# Supplementary material for: Phylostratigraphic Analysis Shows the Earliest Origination of the Abiotic Stress Associated Genes in A. thaliana
Source: MDPI journal article supplement (doi:10.3390/genes10120963), 2019-11-22
Supplement: s1 [file s1]

**Supplementary materials for Mustafin et al. “Phylostratigraphic Analysis Shows the  
Earliest Origination of the Abiotic Stress Associated Genes in *A. thaliana*”**

File content:

|                 |    |
|-----------------|----|
| Table S1.....   | 2  |
| Table S2.....   | 3  |
| Table S3.....   | 3  |
| Table S4 .....  | 4  |
| Table S5.....   | 5  |
| Table S6.....   | 6  |
| Table S7.....   | 7  |
| Table S8.....   | 10 |
| Table S9.....   | 13 |
| Table S10.....  | 16 |
| Table S11.....  | 18 |
| Table S12.....  | 20 |
| Table S13.....  | 23 |
| Figure S1.....  | 26 |
| Figure S2.....  | 27 |
| Figure S3.....  | 28 |
| Figure S4.....  | 29 |
| Figure S5.....  | 30 |
| Figure S6.....  | 31 |
| Figure S7.....  | 32 |
| Figure S8.....  | 33 |
| Figure S9.....  | 34 |
| Figure S10..... | 35 |
| Figure S11..... | 36 |
| Figure S12..... | 37 |
| Figure S13..... | 38 |
| Figure S14..... | 39 |
| Figure S15..... | 40 |
| Figure S16..... | 41 |
| Figure S17..... | 42 |

**Table S1.** The comparison of the PAI distribution of genes in the gene networks of *A. thaliana* stress response with the corresponding distribution of the complete set of *A. thaliana* genes according to the results of the permutation test. First line: types of stress. Second line: the proportion of random samples for which the average PAI<sub>rand</sub> value for a set of genes, the same size as the stress network, exceeds the PAI<sub>stress</sub> value for the corresponding stress network. Third row: fraction of random samples of genes in which the value of the quadratic deviation ChiSq<sub>rand</sub> distribution of ages the distribution for all genes is higher than in the corresponding gene networks (ChiSq<sub>stress</sub>). The fifth and subsequent lines: the fraction of random samples of genes in which the number Ng<sub>rand</sub> of genes of the corresponding phylostratum exceeds the number Ng<sub>stress</sub> (the same phylostratum, taken from network). All values in the cells must be multiplied by 10<sup>-5</sup>. The values with p<0.05 are bold and underlined; the values with p>0.95 are underlined. PAI is calculated at the level of similarity of the sequences of ID=0.6.

| stress                                                                             | cold                | heat                | light               | osmotic             | oxidative           | salt                | water               |
|------------------------------------------------------------------------------------|---------------------|---------------------|---------------------|---------------------|---------------------|---------------------|---------------------|
| $p(\text{PAI}_{\text{stress}} < \text{PAI}_{\text{rand}})$                         | 100000              | 100000              | 100000              | 100000              | 100000              | 100000              | 100000              |
| $p(\text{ChiSq}_{\text{stress}} < \text{ChiSq}_{\text{rand}})$                     | <u><b>223</b></u>   | <u><b>2</b></u>     | <u><b>5</b></u>     | <u><b>122</b></u>   | <u><b>5</b></u>     | <u><b>0*</b></u>    | <u><b>0*</b></u>    |
| $p(\text{Ng}_{\text{stress}} < \text{Ng}_{\text{rand}})$ for specific phylostratum |                     |                     |                     |                     |                     |                     |                     |
| 00_Cellular Organisms                                                              | <u><b>132</b></u>   | <u><b>4</b></u>     | <u><b>3402</b></u>  | <u><b>1227</b></u>  | <u><b>0*</b></u>    | <u><b>1247</b></u>  | 42477               |
| 01_Eukaryota                                                                       | <u><b>2881</b></u>  | <u><b>4</b></u>     | 57925               | <u><b>61</b></u>    | 21089               | <u><b>0*</b></u>    | <u><b>0*</b></u>    |
| 02_Viridiplantae                                                                   | 44198               | 71057               | <u><b>2157</b></u>  | 51748               | 16205               | 49038               | <u><b>38</b></u>    |
| 04_Embryophyta                                                                     | 5889                | 11686               | 5827                | 48195               | <u><b>1919</b></u>  | 8738                | 7123                |
| 05_Tracheophyta                                                                    | 60878               | <u><b>3456</b></u>  | <u><b>8</b></u>     | 25283               | <u><b>3905</b></u>  | 26062               | <u><b>2170</b></u>  |
| 07_Magnoliophyta                                                                   | 6147                | 56463               | <u><b>1713</b></u>  | 44252               | 40108               | 66387               | 63483               |
| 08_eudicotyledons                                                                  | 13366               | 60082               | 25812               | <u><b>96940</b></u> | 67407               | 92191               | 86742               |
| 10_Pentapetalae                                                                    | 57104               | 71741               | 40151               | 22362               | 79727               | 13170               | 31431               |
| 11_rosids                                                                          | 77197               | 69092               | <u><b>95858</b></u> | 41455               | 54024               | 25960               | 90845               |
| 12_malvids                                                                         | 68818               | 57219               | 69122               | <u><b>1452</b></u>  | 13245               | 29992               | 8999                |
| 13_Brassicales                                                                     | <u><b>97137</b></u> | <u><b>99234</b></u> | 53067               | 22273               | 88899               | 82821               | 36253               |
| 14_Brassicaceae                                                                    | 63364               | <u><b>99595</b></u> | 92168               | <u><b>99048</b></u> | <u><b>97716</b></u> | <u><b>99995</b></u> | <u><b>99988</b></u> |
| 15_Camelinaeae                                                                     | <u><b>97687</b></u> | 77137               | <u><b>99950</b></u> | <u><b>98110</b></u> | <u><b>95371</b></u> | <u><b>99998</b></u> | <u><b>99855</b></u> |
| 16_Arabidopsis                                                                     | <u><b>95657</b></u> | 89963               | <u><b>95790</b></u> | 92154               | <u><b>96699</b></u> | <u><b>99425</b></u> | <u><b>98990</b></u> |
| 17_A.thaliana                                                                      | <u><b>99808</b></u> | <u><b>98839</b></u> | <u><b>99791</b></u> | <u><b>99274</b></u> | <u><b>95785</b></u> | <u><b>99742</b></u> | <u><b>99986</b></u> |

\* $p < 10^{-5}$

**Table S2.** The comparison of the PAI distribution of genes in the gene networks of *A. thaliana* stress response with the corresponding distribution of the complete set of *A. thaliana* genes according to the results of the permutation test. First line: types of stress. Second line: the proportion of random samples for which the average PAI<sub>rand</sub> value for a set of genes, the same size as the stress network, exceeds the PAI<sub>stress</sub> value for the corresponding stress network. Third row: fraction of random samples of genes in which the value of the quadratic deviation ChiSq<sub>rand</sub> distribution of ages the distribution for all genes is higher than in the corresponding gene networks (ChiSq<sub>stress</sub>). The fifth and subsequent lines: the fraction of random samples of genes in which the number Ng<sub>rand</sub> of genes of the corresponding phylostratum exceeds the number Ng<sub>stress</sub> (the same phylostratum, taken from network). All values in the cells must be multiplied by 10<sup>-5</sup>. The values with p<0.05 are bold and underlined; the values with p>0.95 are underlined. PAI is calculated at the level of similarity of the sequences of ID=0.7.

| stress                                                                             | cold                | heat                | light               | osmotic             | oxidative           | salt                | water                |
|------------------------------------------------------------------------------------|---------------------|---------------------|---------------------|---------------------|---------------------|---------------------|----------------------|
| $p(\text{PAI}_{\text{stress}} < \text{PAI}_{\text{rand}})$                         | 100000              | 100000              | 98000               | 99999               | 100000              | 100000              | 100000               |
| $p(\text{ChiSq}_{\text{stress}} < \text{ChiSq}_{\text{rand}})$                     | <b><u>128</u></b>   | <b><u>0*</u></b>    | <b><u>6</u></b>     | <b><u>15</u></b>    | <b><u>15</u></b>    | <b><u>0*</u></b>    | <b><u>0*</u></b>     |
| $p(\text{Ng}_{\text{stress}} < \text{Ng}_{\text{rand}})$ for specific phylostratum |                     |                     |                     |                     |                     |                     |                      |
| 00_Cellular Organisms                                                              | <b><u>2402</u></b>  | <b><u>1817</u></b>  | 15755               | <b><u>201</u></b>   | <b><u>402</u></b>   | 32742               | 78546                |
| 01_Eukaryota                                                                       | <b><u>266</u></b>   | <b><u>0*</u></b>    | 7165                | <b><u>40</u></b>    | <b><u>983</u></b>   | <b><u>0*</u></b>    | <b><u>0*</u></b>     |
| 02_Viridiplantae                                                                   | 11414               | <b><u>179</u></b>   | 33139               | 61574               | <b><u>3895</u></b>  | 13032               | 24915                |
| 04_Embryophyta                                                                     | 6658                | 46739               | <b><u>2307</u></b>  | 82832               | <b><u>229</u></b>   | 14991               | <b><u>483</u></b>    |
| 05_Tracheophyta                                                                    | 40530               | 23601               | <b><u>51</u></b>    | 11696               | 45746               | <b><u>52</u></b>    | 12297                |
| 07_Magnoliophyta                                                                   | 17302               | <b><u>4322</u></b>  | <b><u>1542</u></b>  | 15336               | 56599               | 75894               | 15184                |
| 08_eudicotyledons                                                                  | 39648               | 41449               | 10404               | 92622               | <b><u>821</u></b>   | 60611               | 84851                |
| 10_Pentapetalae                                                                    | <b><u>1143</u></b>  | 29632               | <b><u>2846</u></b>  | 37337               | <b><u>1956</u></b>  | 30749               | 18990                |
| 11_rosids                                                                          | 7611                | 55235               | 52327               | 63862               | 85947               | 87331               | 65249                |
| 12_malvids                                                                         | 14913               | 62038               | 74049               | 66203               | 76620               | 17744               | 13169                |
| 13_Brassicales                                                                     | 94785               | <b><u>95288</u></b> | 79677               | <b><u>2525</u></b>  | 63724               | 10530               | 42477                |
| 14_Brassicaceae                                                                    | 69311               | <b><u>99794</u></b> | 32578               | 51116               | 88415               | <b><u>95994</u></b> | 86623                |
| 15_Camelinaeae                                                                     | 81494               | 87892               | <b><u>99391</u></b> | <b><u>99178</u></b> | 78710               | <b><u>99952</u></b> | <b><u>99412</u></b>  |
| 16_Arabidopsis                                                                     | <b><u>99027</u></b> | <b><u>95289</u></b> | <b><u>99874</u></b> | <b><u>99552</u></b> | <b><u>99333</u></b> | <b><u>99996</u></b> | <b><u>99927</u></b>  |
| 17_A.thaliana                                                                      | <b><u>99999</u></b> | <b><u>98713</u></b> | <b><u>99998</u></b> | <b><u>99987</u></b> | <b><u>97809</u></b> | <b><u>99999</u></b> | <b><u>100000</u></b> |

\*p<10<sup>-5</sup>

**Table S3.** Quantile values for DI distributions for *A.thaliana* and stress genes. The quantile values for stress gene sets lower than for *A.thaliana* gene set are shown in bold.

| Gene set/quantile | 10     | 25            | 50            | 75            | 90            | 100           |
|-------------------|--------|---------------|---------------|---------------|---------------|---------------|
| <i>A.thaliana</i> | 0      | 0.1018        | 0.2014        | 0.3562        | 0.5639        | 5.0118        |
| All stresses nr   | 0.0433 | <b>0.0948</b> | <b>0.1639</b> | <b>0.2602</b> | <b>0.4022</b> | <b>1.8019</b> |
| Cold              | 0.0639 | 0.1122        | <b>0.174</b>  | <b>0.279</b>  | <b>0.416</b>  | <b>1.8019</b> |
| Heat              | 0.0422 | <b>0.0829</b> | <b>0.1672</b> | <b>0.2754</b> | <b>0.3975</b> | <b>0.798</b>  |
| Light             | 0.0435 | <b>0.0848</b> | <b>0.1531</b> | <b>0.2591</b> | <b>0.4094</b> | <b>0.7462</b> |
| Osmotic           | 0.0557 | 0.1038        | <b>0.1651</b> | <b>0.2297</b> | <b>0.3266</b> | <b>0.6255</b> |
| Oxidative         | 0.0462 | <b>0.0997</b> | <b>0.1668</b> | <b>0.309</b>  | <b>0.4725</b> | <b>0.8395</b> |
| Salt              | 0.05   | <b>0.0948</b> | <b>0.1551</b> | <b>0.2265</b> | <b>0.3402</b> | <b>0.7283</b> |
| Water             | 0.0539 | <b>0.0997</b> | <b>0.164</b>  | <b>0.2441</b> | <b>0.36</b>   | <b>1.0176</b> |

**Table S4.** The comparison of the PAI distribution of genes in the gene networks of *A. thaliana* stress response with the corresponding distribution of the set of *A. thaliana* genes with GO annotations only according to the results of the permutation test. First line: types of stress. Second line: the proportion of random samples for which the average PAI<sub>rand</sub> value for a set of genes, the same size as the stress network, exceeds the PAI<sub>stress</sub> value for the corresponding stress network. Third row: fraction of random samples of genes in which the value of the quadratic deviation ChiSq<sub>rand</sub> distribution of ages the distribution for all genes is higher than in the corresponding gene networks (ChiSq<sub>stress</sub>). The fifth and subsequent lines: the fraction of random samples of genes in which the difference between the proportions of genes of *i*-th phylostratum dfPAI<sub>i</sub> among stress genes exceeds the corresponding proportion among random sample formed from the whole gene set. All values in the cells must be multiplied by 10<sup>-5</sup>. The values with *p*<0.05 are bold and underlined; the values with *p*>0.95 are underlined. PAI is calculated at the level of similarity of the sequences of ID=0.5.

| Stress                                                                                         | Cold               | Heat               | Light             | Osmotic            | Oxidative        | Salt              | Water             | All stress       |
|------------------------------------------------------------------------------------------------|--------------------|--------------------|-------------------|--------------------|------------------|-------------------|-------------------|------------------|
| $p(\text{PAI}_{\text{stress}} < \text{PAI}_{\text{rand}})$                                     | <u>100000</u>      | <u>100000</u>      | <u>100000</u>     | <u>100000</u>      | <u>100000</u>    | <u>100000</u>     | <u>100000</u>     | <u>100000</u>    |
| $p(\text{ChiSq}_{\text{stress}} < \text{ChiSq}_{\text{rand}})$                                 | <b><u>383</u></b>  | <b><u>331</u></b>  | <b><u>800</u></b> | <b><u>4493</u></b> | <b><u>65</u></b> | <b><u>1</u></b>   | <b><u>5</u></b>   | <b><u>0*</u></b> |
| $p(\text{dfPAI}_{i \text{ stress}} < \text{dfPAI}_{i \text{ rand}})$ for specific phylostratum |                    |                    |                   |                    |                  |                   |                   |                  |
| 00_Cellular Organisms                                                                          | <b><u>52</u></b>   | <b><u>0*</u></b>   | <b><u>27</u></b>  | <b><u>1611</u></b> | <b><u>0*</u></b> | <b><u>0*</u></b>  | <b><u>294</u></b> | <b><u>0*</u></b> |
| 01_Eukaryota                                                                                   | 14473              | 39934              | 39772             | <b><u>2842</u></b> | 79931            | <b><u>403</u></b> | <b><u>78</u></b>  | <b><u>68</u></b> |
| 02_Viridiplantae                                                                               | 16852              | 12233              | 7182              | 33775              | 19632            | 84540             | <b><u>102</u></b> | 3491             |
| 04_Embryophyta                                                                                 | 50791              | <b><u>4378</u></b> | 14719             | 53768              | 13271            | 89596             | 29436             | 32900            |
| 05_Tracheophyta                                                                                | <b><u>2519</u></b> | 67453              | 34339             | 54486              | <u>99491</u>     | 25153             | 42304             | 59527            |
| 07_Magnoliophyta                                                                               | 42072              | <u>97829</u>       | 29295             | 26648              | 52702            | 50569             | 84905             | 75369            |
| 08_eudicotyledons                                                                              | <u>95404</u>       | 64025              | 79964             | 9366               | 62625            | 71922             | 82719             | <u>97286</u>     |
| 10_Pentapetales                                                                                | 68730              | 71710              | 67429             | 30664              | 51379            | 50032             | 59369             | 93257            |
| 11_rosids                                                                                      | 91798              | 79025              | 90986             | 84048              | 80939            | <u>99017</u>      | 71540             | <u>99966</u>     |
| 12_malvids                                                                                     | 14002              | 37435              | 47453             | 40978              | 15228            | 65209             | 62179             | 74895            |
| 13_Brassicales                                                                                 | 89041              | 94694              | 60951             | 88962              | <u>96918</u>     | <u>97851</u>      | <u>98654</u>      | <u>99999</u>     |
| 14_Brassicaceae                                                                                | <u>99833</u>       | 86333              | <u>99795</u>      | <u>99977</u>       | <u>99561</u>     | <u>99996</u>      | <u>100000</u>     | <u>100000</u>    |
| 15_Camelinaeae                                                                                 | 85947              | 70032              | <u>96709</u>      | 75897              | 48976            | <u>99641</u>      | <u>99376</u>      | <u>99985</u>     |
| 16_Arabidopsis                                                                                 | 69073              | 56559              | 68163             | 60183              | 35051            | 84847             | 81810             | 99255            |
| 17_A.thaliana                                                                                  | <u>98228</u>       | 94191              | <u>98080</u>      | <u>95937</u>       | 92420            | <u>98847</u>      | <u>99726</u>      | <u>100000</u>    |

\**p*<10<sup>-5</sup>

**Table S5.** Comparison of the divergence index (DI) distribution of genes in the gene networks of *A. thaliana* stress response with the corresponding distribution of the set of *A. thaliana* genes with GO annotations only according to the results of the permutation test. First line: types of stress. Second line: the proportion of random samples for which the average  $DI_{rand}$  value for a set of genes, the same size as the stress network, exceeds the  $DI_{stress}$  value for the corresponding stress network. Third line: fraction of random samples of genes in which the value of the quadratic deviation  $ChiSq_{rand}$  distribution of DI from such distribution for all genes is higher than in the corresponding gene networks ( $ChiSq_{stress}$ ). The fifth and subsequent lines: fraction of random samples of genes in which the difference between the proportion of genes of *i*-th phylostratum  $dfDI_i$  among stress genes exceeds the corresponding proportion among random sample formed from the whole gene set. All values in the cells must be multiplied by  $10^{-5}$ . Values with  $p < 0.05$  are bold and underlined; values with  $p > 0.95$  are underlined.

| Stress                                                 | cold         | heat         | light        | osmotic      | oxidative    | salt          | water         | All stresses nr |
|--------------------------------------------------------|--------------|--------------|--------------|--------------|--------------|---------------|---------------|-----------------|
| $p(DI_{stress} < DI_{rand})$                           | <u>97074</u> | <u>99787</u> | <u>99996</u> | <u>99993</u> | <u>98604</u> | <u>100000</u> | <u>100000</u> | <u>100000</u>   |
| $p(ChiSq_{stress} < ChiSq_{rand})$                     | 12845        | 48023        | <b>4856</b>  | <b>981</b>   | 56693        | <b>12</b>     | <b>154</b>    | <b>0*</b>       |
| $p(N_{DI\ stress} < N_{DI\ rand})$ for specific DI bin |              |              |              |              |              |               |               |                 |
| [0,0.1]                                                | 88469        | 19711        | <b>3203</b>  | 42161        | 26898        | <b>4897</b>   | 24835         | <b>4861</b>     |
| (0.1,0.2]                                              | <b>132</b>   | <b>3921</b>  | <b>806</b>   | <b>61</b>    | <b>4646</b>  | <b>1</b>      | <b>10</b>     | <b>0*</b>       |
| (0.2,0.3]                                              | 19309        | 42975        | 71119        | <b>4174</b>  | 69421        | 38369         | 13149         | 25209           |
| (0.3,0.4]                                              | 51357        | 41815        | 91179        | <u>96457</u> | 70437        | <u>97499</u>  | <u>96664</u>  | <u>99469</u>    |
| (0.4,0.5]                                              | 69825        | 74331        | 55547        | 91495        | 28092        | <u>96485</u>  | 93985         | <u>98761</u>    |
| (0.5,0.6]                                              | 68516        | 72536        | 67177        | 91395        | 85348        | <u>99532</u>  | <u>99787</u>  | <u>99852</u>    |
| (0.6,0.7]                                              | 94787        | 84728        | <u>99028</u> | 88730        | 21792        | 93593         | 81924         | <u>99935</u>    |
| (0.7,0.8]                                              | 75239        | 57231        | 49665        | 88216        | 54304        | 92786         | 75816         | <u>97855</u>    |
| (0.8,0.9]                                              | 46403        | 67365        | 78796        | 71542        | 49134        | 91682         | 90210         | <u>99506</u>    |
| (0.9,1]                                                | 62165        | 49801        | 61444        | 54063        | 63996        | 78471         | 76039         | <u>99687</u>    |
| (1,+∞)                                                 | 63107        | 78326        | 88040        | 81972        | 89724        | 96673         | 82373         | <u>99969</u>    |

\* $p < 10^{-5}$

**Table S6.** The characteristics of the gene clusters in the stress gene networks ( $\text{deg}_{\text{int}}$ , the average edge number per node for within cluster edges;  $\text{deg}_{\text{ext}}$ , the average edge number per node for edges connecting cluster and non-cluster nodes;  $k_{\text{net}}$ , the average degree of the node for all network).

| Stress type | Cluster          | $\text{deg}_{\text{int}}$ | $\text{deg}_{\text{ext}}$ |
|-------------|------------------|---------------------------|---------------------------|
| Cold        | 1                | 5.04                      | 0.29                      |
|             | 2                | 4.92                      | 0.15                      |
|             | 3                | 4.20                      | 0.60                      |
|             | 4                | 4.06                      | 0.31                      |
|             | 5                | 2.67                      | 0.33                      |
|             | $k_{\text{net}}$ | 1.83                      |                           |
| Heat        | 1                | 4.77                      | 0.02                      |
|             | 2                | 2.83                      | 0.17                      |
|             | 3                | 12.00                     | 0                         |
|             | $k_{\text{net}}$ | 2.88                      |                           |
| Light       | 1                | 6.30                      | 0.26                      |
|             | 2                | 1.75                      | 0.25                      |
|             | 3                | 3.17                      | 0.50                      |
|             | 4                | 4.00                      | 0.27                      |
|             | 5                | 4.00                      | 0.40                      |
|             | 6                | 2.80                      | 0                         |
|             | $k_{\text{net}}$ | 2.05                      |                           |
| Osmotic     | 1                | 1.33                      | 0.17                      |
|             | 2                | 0.75                      | 0                         |
|             | 3                | 4.41                      | 0.03                      |
|             | $k_{\text{net}}$ | 2.90                      |                           |
| Oxidative   | 1                | 3.00                      | 0.17                      |
|             | 2                | 4.00                      | 0.33                      |
|             | 3                | 5.50                      | 0.10                      |
|             | 4                | 2.60                      | 0.13                      |
|             | 5                | 3.71                      | 0                         |
|             | 6                | 3.20                      | 0                         |
|             | $k_{\text{net}}$ | 1.56                      |                           |
| Salt        | 1                | 7.30                      | 0.03                      |
|             | 2                | 4.21                      | 0.14                      |
|             | 3                | 3.00                      | 0.25                      |
|             | 4                | 2.00                      | 0                         |
|             | 5                | 2.67                      | 0                         |
|             | $k_{\text{net}}$ | 1.92                      |                           |
| Water       | 1                | 4.52                      | 0.02                      |
|             | 2                | 3.20                      | 0.20                      |
|             | 3                | 5.63                      | 0.13                      |
|             | 4                | 4.00                      | 0                         |
|             | $k_{\text{net}}$ | 1.88                      |                           |

**Table S7.** Gene ontology terms associated with specific gene clusters in the heat stress associated gene network obtained using DAVID server. The table includes the following information: the cluster number (Cluster); the GO ID and the name of term separated by ~ (Term); the number of genes associated with term (Count); - the proportion (in %) of genes associated with this GO in the cluster (%); the threshold of EASE Score returned by DAVID (PValue); list of gene IDs associated with the GO term (Genes); the number of genes in cluster (List Total); how many have the function name in gene list of interest (Pop Hits); how many genes in the GO dictionary (on the top of table) has that function name in the background genome (Pop Total); the magnitude of enrichment (Fold Enrichment); the Bonferroni correction's of the enrichment's P-values (Bonferroni); the Benjamini correction's of the enrichment's P-values (Benjamini); false discovery rate, the percentages of test which might be false positive (FDR). P-values equal or smaller than 0.05 considered strongly enriched in the annotation categories.

| Cluster            | Term                                                                                                     | Count | %     | PValue   | Genes                                                                                                                                                                                                                                 | List Total | Pop Hits | Pop Total | Fold Enrichment | Bonferroni | Benjamini | FDR      |
|--------------------|----------------------------------------------------------------------------------------------------------|-------|-------|----------|---------------------------------------------------------------------------------------------------------------------------------------------------------------------------------------------------------------------------------------|------------|----------|-----------|-----------------|------------|-----------|----------|
| Biological process |                                                                                                          |       |       |          |                                                                                                                                                                                                                                       |            |          |           |                 |            |           |          |
| 1                  | GO:0034620~cellular response to unfolded protein                                                         | 2     | 8.33  | 2.49E-03 | AT2G26150, AT5G62390                                                                                                                                                                                                                  | 24         | 2        | 18499     | 770.7917        | 1.64E-01   | 2.21E-02  | 2.56E+00 |
| 1                  | GO:0034605~cellular response to heat                                                                     | 3     | 12.50 | 4.72E-04 | AT2G26150, AT5G62390, AT3G08970                                                                                                                                                                                                       | 24         | 26       | 18499     | 88.9375         | 3.34E-02   | 4.84E-03  | 4.90E-01 |
| 1                  | GO:0070370~cellular heat acclimation                                                                     | 3     | 12.50 | 6.61E-05 | AT4G15802, AT3G25230, AT5G48570                                                                                                                                                                                                       | 24         | 10       | 18499     | 231.2375        | 4.75E-03   | 7.93E-04  | 6.88E-02 |
| 1                  | GO:0009644~response to high light intensity                                                              | 4     | 16.67 | 4.22E-05 | AT2G26150, AT4G27670, AT1G74310, AT4G12400                                                                                                                                                                                            | 24         | 55       | 18499     | 56.05758        | 3.04E-03   | 6.08E-04  | 4.39E-02 |
| 1                  | GO:0042542~response to hydrogen peroxide                                                                 | 5     | 20.83 | 5.51E-07 | AT2G26150, AT4G27670, AT1G74310, AT5G05410, AT4G12400                                                                                                                                                                                 | 24         | 54       | 18499     | 71.3696         | 3.97E-05   | 9.92E-06  | 5.73E-04 |
| 1                  | GO:0006457~protein folding                                                                               | 10    | 41.67 | 3.20E-11 | AT5G42020, AT5G56010, AT4G26780, AT5G53400, AT3G17880, AT5G62390, AT1G09080, AT3G08970, AT3G25230, AT5G02500                                                                                                                          | 24         | 288      | 18499     | 26.7636         | 2.31E-09   | 7.69E-10  | 3.33E-08 |
| 1                  | GO:0010286~heat acclimation                                                                              | 7     | 29.17 | 4.89E-12 | AT2G26150, AT4G26780, AT5G53400, AT3G17880, AT4G21320, AT5G05410, AT4G12400                                                                                                                                                           | 24         | 38       | 18499     | 141.9879        | 3.52E-10   | 1.76E-10  | 5.09E-09 |
| 1                  | GO:0009408~response to heat                                                                              | 21    | 87.50 | 2.78E-39 | AT5G56010, AT4G11260, AT4G27670, AT3G25230, AT5G63870, AT4G12400, AT2G26150, AT4G04950, AT5G42020, AT3G09350, AT4G26780, AT5G53400, AT4G21320, AT1G09080, AT1G74310, AT3G08970, AT4G15802, AT5G16820, AT3G10800, AT5G05410, AT5G02500 | 24         | 160      | 18499     | 101.1664        | 2.00E-37   | 2.00E-37  | 2.89E-36 |
| 2                  | GO:0009737~response to abscisic acid                                                                     | 4     | 20.00 | 7.21E-03 | AT5G57050, AT1G66340, AT4G26080, AT2G42540                                                                                                                                                                                            | 20         | 394      | 18499     | 9.390355        | 6.12E-01   | 4.87E-02  | 8.09E+00 |
| 2                  | GO:0043044~ATP-dependent chromatin remodeling                                                            | 2     | 10.00 | 5.13E-03 | AT3G06400, AT2G46020                                                                                                                                                                                                                  | 20         | 5        | 18499     | 369.98          | 4.90E-01   | 3.67E-02  | 5.82E+00 |
| 2                  | GO:0009871~jasmonic acid and ethylene-dependent systemic resistance, ethylene mediated signaling pathway | 2     | 10.00 | 4.10E-03 | AT1G66340, AT5G03280                                                                                                                                                                                                                  | 20         | 4        | 18499     | 462.475         | 4.16E-01   | 3.12E-02  | 4.68E+00 |
| 2                  | GO:0016569~covalent chromatin modification                                                               | 3     | 15.00 | 3.63E-03 | AT3G06400, AT3G06010, AT2G46020                                                                                                                                                                                                       | 20         | 88       | 18499     | 31.53239        | 3.79E-01   | 2.93E-02  | 4.15E+00 |
| 2                  | GO:0042742~defense response to bacterium                                                                 | 4     | 20.00 | 2.67E-03 | AT1G66340, AT1G16540, AT2G38470, AT5G03280                                                                                                                                                                                            | 20         | 276      | 18499     | 13.40507        | 2.95E-01   | 2.31E-02  | 3.07E+00 |
| 2                  | GO:0008219~cell death                                                                                    | 3     | 15.00 | 9.21E-04 | AT5G03280, AT1G64280, AT3G16770                                                                                                                                                                                                       | 20         | 44       | 18499     | 63.06477        | 1.14E-01   | 9.25E-03  | 1.07E+00 |
| 2                  | GO:0010119~regulation of stomatal movement                                                               | 3     | 15.00 | 9.64E-04 | AT1G66340, AT4G26080, AT5G03280                                                                                                                                                                                                       | 20         | 45       | 18499     | 61.66333        | 1.19E-01   | 8.98E-03  | 1.12E+00 |
| 2                  | GO:0009873~ethylene-activated signaling pathway                                                          | 4     | 20.00 | 7.70E-04 | AT1G66340, AT1G54490, AT5G03280, AT3G16770                                                                                                                                                                                            | 20         | 179      | 18499     | 20.66927        | 9.60E-02   | 8.38E-03  | 8.94E-01 |
| 2                  | GO:0010286~heat acclimation                                                                              | 3     | 15.00 | 6.87E-04 | AT1G54490, AT2G42540, AT3G16770                                                                                                                                                                                                       | 20         | 38       | 18499     | 73.02237        | 8.61E-02   | 8.15E-03  | 7.99E-01 |
| 2                  | GO:0001944~vasculature development                                                                       | 3     | 15.00 | 3.20E-04 | AT1G66340, AT1G54490, AT5G03280                                                                                                                                                                                                       | 20         | 26       | 18499     | 106.725         | 4.11E-02   | 4.18E-03  | 3.73E-01 |
| 2                  | GO:0009723~response to ethylene                                                                          | 4     | 20.00 | 2.63E-04 | AT1G66340, AT1G54490, AT5G03280, AT3G16770                                                                                                                                                                                            | 20         | 124      | 18499     | 29.8371         | 3.39E-02   | 3.83E-03  | 3.07E-01 |
| 2                  | GO:0009688~abscisic acid biosynthetic process                                                            | 3     | 15.00 | 1.04E-04 | AT1G16540, AT5G67030, AT1G52340                                                                                                                                                                                                       | 20         | 15       | 18499     | 184.99          | 1.35E-02   | 1.70E-03  | 1.21E-01 |
| 2                  | GO:0070370~cellular heat acclimation                                                                     | 3     | 15.00 | 4.48E-05 | AT2G30250, AT2G38470, AT1G54490                                                                                                                                                                                                       | 20         | 10       | 18499     | 277.485         | 5.85E-03   | 8.37E-04  | 5.22E-02 |
| 2                  | GO:0009409~response to cold                                                                              | 6     | 30.00 | 1.03E-05 | AT5G59820, AT1G16540, AT2G30250, AT4G26080, AT2G38470, AT2G42540                                                                                                                                                                      | 20         | 299      | 18499     | 18.56087        | 1.35E-03   | 2.25E-04  | 1.20E-02 |
| 2                  | GO:0009651~response to salt stress                                                                       | 7     | 35.00 | 6.31E-06 | AT1G66340, AT1G16540, AT2G30250, AT3G06010, AT2G38470, AT5G03280, AT2G42540                                                                                                                                                           | 20         | 484      | 18499     | 13.37738        | 8.27E-04   | 2.07E-04  | 7.36E-03 |
| 2                  | GO:0009414~response to water deprivation                                                                 | 6     | 30.00 | 7.36E-06 | AT5G57050, AT5G67030, AT3G06010, AT2G38470, AT2G42540, AT1G52340                                                                                                                                                                      | 20         | 279      | 18499     | 19.8914         | 9.64E-04   | 1.93E-04  | 8.58E-03 |
| 2                  | GO:0010182~sugar mediated signaling pathway                                                              | 5     | 25.00 | 2.14E-08 | AT1G66340, AT1G16540, AT5G67030, AT5G03280, AT1G52340                                                                                                                                                                                 | 20         | 30       | 18499     | 154.1583        | 2.80E-06   | 9.35E-07  | 2.50E-05 |
| 2                  | GO:0006970~response to osmotic stress                                                                    | 7     | 35.00 | 1.84E-09 | AT5G57050, AT1G16540, AT2G30250, AT5G67030, AT2G38470, AT5G03280, AT2G42540                                                                                                                                                           | 20         | 122      | 18499     | 53.0709         | 2.41E-07   | 1.20E-07  | 2.14E-06 |
| 2                  | GO:0009408~response to heat                                                                              | 14    | 70.00 | 2.39E-23 | AT1G16540, AT5G59820, AT5G47910, AT3G06010, AT5G03280, AT1G64280, AT5G57050, AT1G66340, AT1G79440, AT5G67030, AT1G08550, AT4G26080, AT2G38470, AT1G52340                                                                              | 20         | 160      | 18499     | 80.93313        | 3.13E-21   | 3.13E-21  | 2.78E-20 |

|                    |                                                                                                    |    |        |          |                                                                                                                                                          |    |      |       |          |          |          |          |
|--------------------|----------------------------------------------------------------------------------------------------|----|--------|----------|----------------------------------------------------------------------------------------------------------------------------------------------------------|----|------|-------|----------|----------|----------|----------|
| 3                  | GO:0000002~mitochondrial genome maintenance                                                        | 2  | 33.33  | 8.11E-04 | AT3G10140, AT3G24320                                                                                                                                     | 6  | 3    | 18499 | 2055.444 | 3.66E-02 | 1.85E-02 | 7.64E-01 |
| 3                  | GO:0006281~DNA repair                                                                              | 3  | 50.00  | 1.07E-03 | AT1G03190, AT3G10140, AT3G28030                                                                                                                          | 6  | 194  | 18499 | 47.67784 | 4.81E-02 | 1.63E-02 | 1.01E+00 |
| 3                  | GO:0009408~response to heat                                                                        | 5  | 83.33  | 2.68E-08 | AT1G03190, AT3G10140, AT4G26840, AT3G24320, AT3G28030                                                                                                    | 6  | 160  | 18499 | 96.34896 | 1.23E-06 | 1.23E-06 | 2.53E-05 |
| 4                  | GO:0048528~post-embryonic root development                                                         | 2  | 15.38  | 6.47E-03 | AT1G64520, AT4G38630                                                                                                                                     | 13 | 10   | 18499 | 284.6    | 2.77E-01 | 2.91E-02 | 6.06E+00 |
| 4                  | GO:0009408~response to heat                                                                        | 3  | 23.08  | 4.64E-03 | AT4G29040, AT1G64520, AT4G38630                                                                                                                          | 13 | 160  | 18499 | 26.68125 | 2.07E-01 | 2.30E-02 | 4.38E+00 |
| 4                  | GO:0042176~regulation of protein catabolic process                                                 | 2  | 15.38  | 3.89E-03 | AT1G20200, AT1G75990                                                                                                                                     | 13 | 6    | 18499 | 474.3333 | 1.77E-01 | 2.14E-02 | 3.68E+00 |
| 4                  | GO:0080129~proteasome core complex assembly                                                        | 2  | 15.38  | 1.30E-03 | AT4G29040, AT4G38630                                                                                                                                     | 13 | 2    | 18499 | 1423     | 6.28E-02 | 8.08E-03 | 1.24E+00 |
| 4                  | GO:0043248~proteasome assembly                                                                     | 3  | 23.08  | 5.22E-05 | AT4G29040, AT1G64520, AT4G38630                                                                                                                          | 13 | 17   | 18499 | 251.1176 | 2.61E-03 | 3.73E-04 | 5.02E-02 |
| 4                  | GO:0051788~response to misfolded protein                                                           | 3  | 23.08  | 1.16E-06 | AT4G29040, AT1G64520, AT4G38630                                                                                                                          | 13 | 3    | 18499 | 1423     | 5.78E-05 | 9.64E-06 | 1.11E-03 |
| 4                  | GO:0043161~proteasome-mediated ubiquitin-dependent protein catabolic process                       | 6  | 46.15  | 3.57E-07 | AT4G29040, AT4G24820, AT1G64520, AT5G09900, AT4G38630, AT5G64760                                                                                         | 13 | 256  | 18499 | 33.35156 | 1.79E-05 | 3.57E-06 | 3.44E-04 |
| 4                  | GO:0030433~ER-associated ubiquitin-dependent protein catabolic process                             | 6  | 46.15  | 5.17E-12 | AT5G20000, AT4G29040, AT1G53750, AT1G45000, AT5G19990, AT3G05530                                                                                         | 13 | 29   | 18499 | 294.4138 | 2.59E-10 | 6.47E-11 | 4.98E-09 |
| 4                  | GO:0045899~positive regulation of RNA polymerase II transcriptional preinitiation complex assembly | 6  | 46.15  | 1.10E-14 | AT5G20000, AT4G29040, AT1G53750, AT1G45000, AT5G19990, AT3G05530                                                                                         | 13 | 10   | 18499 | 853.8    | 5.50E-13 | 1.83E-13 | 1.06E-11 |
| 4                  | GO:0006511~ubiquitin-dependent protein catabolic process                                           | 11 | 84.62  | 7.84E-18 | AT4G29040, AT1G53750, AT5G19990, AT1G64520, AT5G09900, AT1G20200, AT4G38630, AT1G75990, AT5G64760, AT3G05530                                             | 13 | 242  | 18499 | 64.68182 | 3.92E-16 | 1.96E-16 | 7.55E-15 |
| 4                  | GO:0030163~protein catabolic process                                                               | 10 | 76.92  | 1.70E-18 | AT5G20000, AT4G29040, AT1G53750, AT4G24820, AT1G45000, AT5G19990, AT1G64520, AT4G38630, AT1G75990, AT5G64760                                             | 13 | 112  | 18499 | 127.0536 | 8.52E-17 | 8.52E-17 | 1.64E-15 |
| Cellular component |                                                                                                    |    |        |          |                                                                                                                                                          |    |      |       |          |          |          |          |
| 1                  | GO:0005788~endoplasmic reticulum lumen                                                             | 3  | 12.50  | 6.11E-04 | AT5G42020, AT1G09080, AT3G08970                                                                                                                          | 24 | 40   | 25147 | 78.58438 | 1.88E-02 | 6.30E-03 | 5.24E-01 |
| 1                  | GO:0005829~cytosol                                                                                 | 10 | 41.67  | 1.13E-04 | AT5G42020, AT5G56010, AT4G04950, AT4G11260, AT5G53400, AT5G62390, AT1G74310, AT4G15802, AT3G25230, AT5G02500                                             | 24 | 2309 | 25147 | 4.537859 | 3.50E-03 | 1.75E-03 | 9.71E-02 |
| 1                  | GO:0005737~cytoplasm                                                                               | 14 | 58.33  | 2.85E-05 | AT2G26150, AT5G56010, AT3G09350, AT4G04950, AT4G11260, AT5G53400, AT3G17880, AT1G74310, AT5G16820, AT3G25230, AT5G63870, AT3G10800, AT5G02500, AT4G12400 | 24 | 4407 | 25147 | 3.328587 | 8.82E-04 | 8.82E-04 | 2.44E-02 |
| 4                  | GO:0005886~plasma membrane                                                                         | 6  | 46.15  | 2.21E-02 | AT1G53750, AT4G24820, AT1G45000, AT5G19990, AT1G20200, AT1G75990                                                                                         | 13 | 3702 | 25147 | 3.135145 | 3.01E-01 | 3.52E-02 | 1.47E+01 |
| 4                  | GO:0016020~membrane                                                                                | 5  | 38.46  | 8.08E-03 | AT4G29040, AT4G24820, AT1G45000, AT4G38630, AT1G75990                                                                                                    | 13 | 1797 | 25147 | 5.382261 | 1.22E-01 | 1.43E-02 | 5.60E+00 |
| 4                  | GO:0005737~cytoplasm                                                                               | 9  | 69.23  | 2.23E-04 | AT5G20000, AT4G29040, AT1G53750, AT1G45000, AT5G19990, AT5G09900, AT4G38630, AT5G64760, AT3G05530                                                        | 13 | 4407 | 25147 | 3.950411 | 3.57E-03 | 4.47E-04 | 1.59E-01 |
| 4                  | GO:0005634~nucleus                                                                                 | 13 | 100.00 | 1.22E-05 | AT5G20000, AT4G29040, AT1G53750, AT4G24820, AT1G45000, AT5G19990, AT1G64520, AT5G09900, AT1G20200, AT4G38630, AT1G75990, AT5G64760, AT3G05530            | 13 | 9796 | 25147 | 2.567068 | 1.95E-04 | 2.78E-05 | 8.64E-03 |
| 4                  | GO:0005829~cytosol                                                                                 | 12 | 92.31  | 4.21E-11 | AT5G20000, AT4G29040, AT1G53750, AT4G24820, AT1G45000, AT5G19990, AT1G64520, AT5G09900, AT1G20200, AT4G38630, AT1G75990, AT3G05530                       | 13 | 2309 | 25147 | 10.0531  | 6.73E-10 | 1.12E-10 | 2.99E-08 |
| 4                  | GO:0008541~proteasome regulatory particle, lid subcomplex                                          | 6  | 46.15  | 4.12E-14 | AT4G24820, AT1G64520, AT5G09900, AT1G20200, AT1G75990, AT5G64760                                                                                         | 13 | 16   | 25147 | 725.3942 | 6.59E-13 | 1.32E-13 | 2.93E-11 |
| 4                  | GO:0031597~cytosolic proteasome complex                                                            | 6  | 46.15  | 4.36E-15 | AT5G20000, AT4G29040, AT1G53750, AT1G45000, AT5G19990, AT3G05530                                                                                         | 13 | 11   | 25147 | 1055.119 | 6.93E-14 | 1.73E-14 | 3.08E-12 |
| 4                  | GO:0008540~proteasome regulatory particle, base subcomplex                                         | 7  | 53.85  | 4.87E-17 | AT5G20000, AT4G29040, AT1G53750, AT1G45000, AT5G19990, AT4G38630, AT3G05530                                                                              | 13 | 18   | 25147 | 752.2607 | 7.80E-16 | 2.60E-16 | 3.46E-14 |
| 4                  | GO:0031595~nuclear proteasome complex                                                              | 8  | 61.54  | 4.97E-22 | AT5G20000, AT4G29040, AT1G53750, AT1G45000, AT5G19990, AT5G09900, AT5G64760, AT3G05530                                                                   | 13 | 12   | 25147 | 1289.59  | 7.95E-21 | 3.98E-21 | 3.53E-19 |
| 4                  | GO:0000502~proteasome complex                                                                      | 13 | 100.00 | 2.47E-32 | AT5G20000, AT4G29040, AT1G53750, AT4G24820, AT1G45000, AT5G19990, AT1G64520, AT5G09900, AT1G20200, AT4G38630, AT1G75990, AT5G64760, AT3G05530            | 13 | 64   | 25147 | 392.9219 | 3.95E-31 | 3.95E-31 | 1.75E-29 |
| Molecular function |                                                                                                    |    |        |          |                                                                                                                                                          |    |      |       |          |          |          |          |
| 1                  | GO:0051082~unfolded protein binding                                                                | 3  | 12.50  | 4.92E-03 | AT5G56010, AT4G26780, AT5G53400                                                                                                                          | 23 | 87   | 18171 | 27.24288 | 1.50E-01 | 5.28E-02 | 4.21E+00 |
| 1                  | GO:0030544~Hsp70 protein binding                                                                   | 2  | 8.33   | 2.42E-03 | AT3G09350, AT3G17880                                                                                                                                     | 23 | 2    | 18171 | 790.0435 | 7.68E-02 | 3.92E-02 | 2.09E+00 |
| 1                  | GO:0005515~protein binding                                                                         | 10 | 41.67  | 2.06E-04 | AT2G26150, AT5G56010, AT4G04950, AT4G11260, AT3G17880, AT5G62390, AT1G74310, AT3G10800, AT5G05410, AT5G02500                                             | 23 | 1901 | 18171 | 4.155936 | 6.77E-03 | 6.77E-03 | 1.80E-01 |
| 2                  | GO:0005515~protein binding                                                                         | 11 | 55.00  | 5.82E-06 | AT5G57050, AT1G66340, AT3G06400, AT5G47910, AT2G30250, AT4G26080, AT2G38470, AT1G54490, AT1G64280, AT2G46020, AT3G16770                                  | 20 | 1901 | 18171 | 5.257259 | 3.03E-04 | 3.03E-04 | 5.66E-03 |
| 4                  | GO:0030234~enzyme regulator activity                                                               | 2  | 15.38  | 6.42E-03 | AT1G20200, AT1G75990                                                                                                                                     | 10 | 13   | 18171 | 279.5538 | 6.24E-02 | 1.07E-02 | 3.79E+00 |



|   |                                                  |    |       |          |                                                                                                                         |    |      |       |          |          |          |          |
|---|--------------------------------------------------|----|-------|----------|-------------------------------------------------------------------------------------------------------------------------|----|------|-------|----------|----------|----------|----------|
| 4 | GO:0005524~ATP binding                           | 6  | 46.15 | 3.01E-03 | AT5G20000, AT4G29040, AT1G53750, AT1G45000, AT5G19990, AT3G05530                                                        | 10 | 2372 | 18171 | 4.596374 | 2.97E-02 | 6.02E-03 | 1.80E+00 |
| 4 | GO:0016787~hydrolase activity                    | 5  | 38.46 | 5.77E-05 | AT5G20000, AT4G29040, AT1G53750, AT1G45000, AT5G19990                                                                   | 10 | 487  | 18171 | 18.65606 | 5.77E-04 | 1.44E-04 | 3.46E-02 |
| 4 | GO:0016887~ATPase activity                       | 6  | 46.15 | 4.75E-08 | AT5G20000, AT4G29040, AT1G53750, AT1G45000, AT5G19990, AT3G05530                                                        | 10 | 241  | 18171 | 45.239   | 4.75E-07 | 1.58E-07 | 2.85E-05 |
| 4 | GO:0017025~TBP-class protein binding             | 6  | 46.15 | 6.14E-13 | AT5G20000, AT4G29040, AT1G53750, AT1G45000, AT5G19990, AT3G05530                                                        | 10 | 27   | 18171 | 403.8    | 6.14E-12 | 3.07E-12 | 3.69E-10 |
| 4 | GO:0036402~proteasome-activating ATPase activity | 6  | 46.15 | 1.92E-15 | AT5G20000, AT4G29040, AT1G53750, AT1G45000, AT5G19990, AT3G05530                                                        | 10 | 10   | 18171 | 1090.26  | 1.89E-14 | 1.89E-14 | 1.13E-12 |
| 1 | GO:0051082~unfolded protein binding              | 3  | 12.50 | 4.92E-03 | AT5G56010, AT4G26780, AT5G53400                                                                                         | 23 | 87   | 18171 | 27.24288 | 1.50E-01 | 5.28E-02 | 4.21E+00 |
| 1 | GO:0030544~Hsp70 protein binding                 | 2  | 8.33  | 2.42E-03 | AT3G09350, AT3G17880                                                                                                    | 23 | 2    | 18171 | 790.0435 | 7.68E-02 | 3.92E-02 | 2.09E+00 |
| 1 | GO:0005515~protein binding                       | 10 | 41.67 | 2.06E-04 | AT2G26150, AT5G56010, AT4G04950, AT4G11260, AT3G17880, AT5G62390, AT1G74310, AT3G10800, AT5G05410, AT5G02500            | 23 | 1901 | 18171 | 4.155936 | 6.77E-03 | 6.77E-03 | 1.80E-01 |
| 2 | GO:0005515~protein binding                       | 11 | 55.00 | 5.82E-06 | AT5G57050, AT1G66340, AT3G06400, AT5G47910, AT2G30250, AT4G26080, AT2G38470, AT1G54490, AT1G64280, AT2G46020, AT3G16770 | 20 | 1901 | 18171 | 5.257259 | 3.03E-04 | 3.03E-04 | 5.66E-03 |
| 4 | GO:0030234~enzyme regulator activity             | 2  | 15.38 | 6.42E-03 | AT1G20200, AT1G75990                                                                                                    | 10 | 13   | 18171 | 279.5538 | 6.24E-02 | 1.07E-02 | 3.79E+00 |
| 4 | GO:0005524~ATP binding                           | 6  | 46.15 | 3.01E-03 | AT5G20000, AT4G29040, AT1G53750, AT1G45000, AT5G19990, AT3G05530                                                        | 10 | 2372 | 18171 | 4.596374 | 2.97E-02 | 6.02E-03 | 1.80E+00 |
| 4 | GO:0016787~hydrolase activity                    | 5  | 38.46 | 5.77E-05 | AT5G20000, AT4G29040, AT1G53750, AT1G45000, AT5G19990                                                                   | 10 | 487  | 18171 | 18.65606 | 5.77E-04 | 1.44E-04 | 3.46E-02 |
| 4 | GO:0016887~ATPase activity                       | 6  | 46.15 | 4.75E-08 | AT5G20000, AT4G29040, AT1G53750, AT1G45000, AT5G19990, AT3G05530                                                        | 10 | 241  | 18171 | 45.239   | 4.75E-07 | 1.58E-07 | 2.85E-05 |
| 4 | GO:0017025~TBP-class protein binding             | 6  | 46.15 | 6.14E-13 | AT5G20000, AT4G29040, AT1G53750, AT1G45000, AT5G19990, AT3G05530                                                        | 10 | 27   | 18171 | 403.8    | 6.14E-12 | 3.07E-12 | 3.69E-10 |
| 4 | GO:0036402~proteasome-activating ATPase activity | 6  | 46.15 | 1.92E-15 | AT5G20000, AT4G29040, AT1G53750, AT1G45000, AT5G19990, AT3G05530                                                        | 10 | 10   | 18171 | 1090.26  | 1.89E-14 | 1.89E-14 | 1.13E-12 |

**Table S8.** Gene ontology terms associated with specific gene clusters in the cold stress associated gene network obtained using DAVID server. The description of the columns as in Table S7.

| Cluster            | Term                                                                     | Count | %      | PValue   | Genes                                                                                             | List Total | Pop Hits | Pop Total | Fold Enrichment | Bonferroni | Benjamini | FDR      |
|--------------------|--------------------------------------------------------------------------|-------|--------|----------|---------------------------------------------------------------------------------------------------|------------|----------|-----------|-----------------|------------|-----------|----------|
| Biological process |                                                                          |       |        |          |                                                                                                   |            |          |           |                 |            |           |          |
| 1                  | GO:0048509~regulation of meristem development                            | 2     | 9.52   | 9.69E-03 | AT1G27320, AT5G35750                                                                              | 21         | 9        | 18499     | 195.7566        | 5.59E-01   | 4.70E-02  | 9.92E+00 |
| 1                  | GO:1902456~regulation of stomatal opening                                | 2     | 9.52   | 8.62E-03 | AT5G57050, AT4G33950                                                                              | 21         | 8        | 18499     | 220.2262        | 5.17E-01   | 4.44E-02  | 8.87E+00 |
| 1                  | GO:0048831~regulation of shoot system development                        | 2     | 9.52   | 8.62E-03 | AT1G27320, AT5G35750                                                                              | 21         | 8        | 18499     | 220.2262        | 5.17E-01   | 4.44E-02  | 8.87E+00 |
| 1                  | GO:2001295~malonyl-CoA biosynthetic process                              | 2     | 9.52   | 5.39E-03 | AT1G36160, AT1G36180                                                                              | 21         | 5        | 18499     | 352.3619        | 3.65E-01   | 3.19E-02  | 5.64E+00 |
| 1                  | GO:0006470~protein dephosphorylation                                     | 3     | 14.29  | 5.46E-03 | AT5G57050, AT1G72770, AT4G26080                                                                   | 21         | 103      | 18499     | 25.65742        | 3.69E-01   | 3.02E-02  | 5.71E+00 |
| 1                  | GO:0080117~secondary growth                                              | 2     | 9.52   | 4.32E-03 | AT1G27320, AT5G35750                                                                              | 21         | 4        | 18499     | 440.4524        | 3.05E-01   | 2.76E-02  | 4.54E+00 |
| 1                  | GO:0010271~regulation of chlorophyll catabolic process                   | 2     | 9.52   | 3.24E-03 | AT1G27320, AT5G35750                                                                              | 21         | 3        | 18499     | 587.2698        | 2.39E-01   | 2.25E-02  | 3.42E+00 |
| 1                  | GO:0006096~glycolytic process                                            | 3     | 14.29  | 2.64E-03 | AT3G55440, AT1G79550, AT2G36530                                                                   | 21         | 71       | 18499     | 37.22133        | 1.99E-01   | 2.00E-02  | 2.80E+00 |
| 1                  | GO:0034757~negative regulation of iron ion transport                     | 2     | 9.52   | 2.16E-03 | AT1G27320, AT5G35750                                                                              | 21         | 2        | 18499     | 880.9048        | 1.66E-01   | 1.80E-02  | 2.30E+00 |
| 1                  | GO:0009408~response to heat                                              | 4     | 19.05  | 6.50E-04 | AT5G57050, AT1G16540, AT1G79550, AT4G26080                                                        | 21         | 160      | 18499     | 22.02262        | 5.31E-02   | 6.05E-03  | 6.95E-01 |
| 1                  | GO:0009631~cold acclimation                                              | 4     | 19.05  | 2.18E-05 | AT1G74960, AT5G54590, AT1G36160, AT5G66400                                                        | 21         | 51       | 18499     | 69.09057        | 1.83E-03   | 2.29E-04  | 2.34E-02 |
| 1                  | GO:0009409~response to cold                                              | 6     | 28.57  | 1.36E-05 | AT1G16540, AT5G54590, AT4G26080, AT1G27320, AT5G65940, AT2G36530                                  | 21         | 299      | 18499     | 17.67702        | 1.14E-03   | 1.63E-04  | 1.45E-02 |
| 1                  | GO:0010029~regulation of seed germination                                | 4     | 19.05  | 1.04E-05 | AT1G27320, AT3G50500, AT5G35750, AT5G66880                                                        | 21         | 40       | 18499     | 88.09048        | 8.74E-04   | 1.46E-04  | 1.12E-02 |
| 1                  | GO:0009651~response to salt stress                                       | 8     | 38.10  | 4.64E-07 | AT1G16540, AT3G55440, AT1G27320, AT4G33950, AT3G50500, AT5G35750, AT5G66880, AT2G36530            | 21         | 484      | 18499     | 14.56041        | 3.89E-05   | 7.79E-06  | 4.98E-04 |
| 1                  | GO:0009414~response to water deprivation                                 | 7     | 33.33  | 3.62E-07 | AT5G57050, AT5G66400, AT1G27320, AT4G33950, AT3G50500, AT5G35750, AT5G66880                       | 21         | 279      | 18499     | 22.10155        | 3.04E-05   | 7.60E-06  | 3.89E-04 |
| 1                  | GO:0009737~response to abscisic acid                                     | 8     | 38.10  | 1.15E-07 | AT5G57050, AT5G66400, AT4G26080, AT4G33950, AT3G50500, AT5G35750, AT5G66880, AT2G36530            | 21         | 394      | 18499     | 17.88639        | 9.66E-06   | 3.22E-06  | 1.23E-04 |
| 1                  | GO:0006970~response to osmotic stress                                    | 7     | 33.33  | 2.61E-09 | AT5G57050, AT1G16540, AT1G27320, AT4G33950, AT3G50500, AT5G35750, AT5G66880                       | 21         | 122      | 18499     | 50.54372        | 2.19E-07   | 1.10E-07  | 2.80E-06 |
| 1                  | GO:0009738~abscisic acid-activated signaling pathway                     | 8     | 38.10  | 8.96E-10 | AT5G57050, AT4G17870, AT1G27770, AT5G46790, AT4G26080, AT4G33950, AT3G50500, AT5G66880            | 21         | 195      | 18499     | 36.13968        | 7.53E-08   | 7.53E-08  | 9.62E-07 |
| 2                  | GO:0016070~RNA metabolic process                                         | 2     | 15.38  | 5.93E-03 | AT3G14080, AT1G19120                                                                              | 12         | 10       | 18499     | 308.3167        | 2.26E-01   | 2.53E-02  | 5.39E+00 |
| 2                  | GO:0006397~mRNA processing                                               | 3     | 23.08  | 4.68E-03 | AT3G14080, AT1G19120, AT4G24770                                                                   | 12         | 176      | 18499     | 26.27699        | 1.83E-01   | 2.22E-02  | 4.27E+00 |
| 2                  | GO:0000290~deadenylation-dependent decapping of nuclear-transcribed mRNA | 2     | 15.38  | 4.16E-03 | AT3G14080, AT1G19120                                                                              | 12         | 7        | 18499     | 440.4524        | 1.64E-01   | 2.21E-02  | 3.80E+00 |
| 2                  | GO:0000244~spliceosomal tri-snRNP complex assembly                       | 2     | 15.38  | 2.97E-03 | AT4G03430, AT1G60170                                                                              | 12         | 5        | 18499     | 616.6333        | 1.20E-01   | 1.81E-02  | 2.73E+00 |
| 2                  | GO:0000398~mRNA splicing, via spliceosome                                | 3     | 23.08  | 2.00E-03 | AT1G06960, AT4G03430, AT1G60170                                                                   | 12         | 114      | 18499     | 40.56798        | 8.24E-02   | 1.42E-02  | 1.84E+00 |
| 2                  | GO:0009845~seed germination                                              | 3     | 23.08  | 9.18E-04 | AT4G03430, AT4G13850, AT1G60170                                                                   | 12         | 77       | 18499     | 60.06169        | 3.87E-02   | 7.87E-03  | 8.51E-01 |
| 2                  | GO:0032508~DNA duplex unwinding                                          | 3     | 23.08  | 7.38E-05 | AT4G38680, AT4G36020, AT2G17870                                                                   | 12         | 22       | 18499     | 210.2159        | 3.17E-03   | 7.93E-04  | 6.86E-02 |
| 2                  | GO:0009414~response to water deprivation                                 | 5     | 38.46  | 1.54E-05 | AT3G14080, AT4G13850, AT1G19120, AT4G38680, AT4G36020                                             | 12         | 279      | 18499     | 27.62694        | 6.61E-04   | 2.20E-04  | 1.43E-02 |
| 2                  | GO:0009409~response to cold                                              | 9     | 69.23  | 6.71E-13 | AT2G33800, AT1G56070, AT4G03430, AT4G13850, AT1G60170, AT4G38680, AT4G24770, AT4G36020, AT2G17870 | 12         | 299      | 18499     | 46.40217        | 2.89E-11   | 1.44E-11  | 6.25E-10 |
| 2                  | GO:0009631~cold acclimation                                              | 8     | 61.54  | 2.58E-16 | AT3G14080, AT1G56070, AT4G13850, AT1G19120, AT4G38680, AT4G24770, AT4G36020, AT2G17870            | 12         | 51       | 18499     | 241.817         | 9.55E-15   | 9.55E-15  | 2.11E-13 |
| 3                  | GO:0009651~response to salt stress                                       | 3     | 60.00  | 3.96E-03 | AT2G21660, AT1G01060, AT2G46830                                                                   | 5          | 484      | 18499     | 22.93264        | 2.21E-01   | 4.08E-02  | 3.94E+00 |
| 3                  | GO:0042752~regulation of circadian rhythm                                | 2     | 40.00  | 5.18E-03 | AT1G22770, AT1G01060                                                                              | 5          | 24       | 18499     | 308.3167        | 2.79E-01   | 4.01E-02  | 5.12E+00 |
| 3                  | GO:2000028~regulation of photoperiodism, flowering                       | 2     | 40.00  | 4.32E-03 | AT1G22770, AT2G18790                                                                              | 5          | 20       | 18499     | 369.98          | 2.39E-01   | 3.82E-02  | 4.29E+00 |
| 3                  | GO:0006355~regulation of transcription, DNA-templated                    | 4     | 80.00  | 5.49E-03 | AT1G22770, AT1G01060, AT2G18790, AT2G46830                                                        | 5          | 2119     | 18499     | 6.984049        | 2.93E-01   | 3.78E-02  | 5.42E+00 |
| 3                  | GO:0048574~long-day photoperiodism, flowering                            | 2     | 40.00  | 2.59E-03 | AT1G01060, AT2G46830                                                                              | 5          | 12       | 18499     | 616.6333        | 1.51E-01   | 3.22E-02  | 2.59E+00 |
| 3                  | GO:0046686~response to cadmium ion                                       | 3     | 60.00  | 2.00E-03 | AT2G21660, AT1G01060, AT2G46830                                                                   | 5          | 342      | 18499     | 32.45439        | 1.18E-01   | 3.10E-02  | 2.00E+00 |
| 3                  | GO:0042754~negative regulation of circadian rhythm                       | 2     | 40.00  | 6.49E-04 | AT1G01060, AT2G46830                                                                              | 5          | 3        | 18499     | 2466.533        | 4.00E-02   | 1.35E-02  | 6.55E-01 |
| 3                  | GO:0007623~circadian rhythm                                              | 4     | 80.00  | 5.57E-07 | AT1G22770, AT2G21660, AT1G01060, AT2G46830                                                        | 5          | 97       | 18499     | 152.5691        | 3.51E-05   | 1.75E-05  | 5.64E-04 |
| 3                  | GO:0009409~response to cold                                              | 5     | 100.00 | 6.69E-08 | AT1G22770, AT2G21660, AT1G01060, AT2G18790, AT2G46830                                             | 5          | 299      | 18499     | 61.86957        | 4.22E-06   | 4.22E-06  | 6.77E-05 |

|                    |                                                          |    |        |          |                                                                                                                                               |    |      |       |          |          |          |          |
|--------------------|----------------------------------------------------------|----|--------|----------|-----------------------------------------------------------------------------------------------------------------------------------------------|----|------|-------|----------|----------|----------|----------|
| 4                  | GO:0035066~positive regulation of histone acetylation    | 2  | 12.50  | 6.47E-03 | AT4G16420, AT3G07740                                                                                                                          | 16 | 8    | 18499 | 289.0469 | 3.00E-01 | 3.19E-02 | 6.18E+00 |
| 4                  | GO:0050832~defense response to fungus                    | 4  | 25.00  | 5.70E-03 | AT1G20440, AT2G22300, AT3G50970, AT2G42530                                                                                                    | 16 | 464  | 18499 | 9.967134 | 2.70E-01 | 3.09E-02 | 5.47E+00 |
| 4                  | GO:0010200~response to chitin                            | 3  | 18.75  | 5.07E-03 | AT5G59820, AT3G23250, AT3G49530                                                                                                               | 16 | 133  | 18499 | 26.07942 | 2.44E-01 | 3.06E-02 | 4.87E+00 |
| 4                  | GO:0010150~leaf senescence                               | 3  | 18.75  | 2.46E-03 | AT2G22300, AT2G42530, AT2G42540                                                                                                               | 16 | 92   | 18499 | 37.70177 | 1.27E-01 | 1.92E-02 | 2.40E+00 |
| 4                  | GO:0006351~transcription, DNA-templated                  | 7  | 43.75  | 2.47E-03 | AT4G16420, AT5G59820, AT4G25480, AT4G25470, AT4G25490, AT3G49530, AT3G07740                                                                   | 16 | 1886 | 18499 | 4.291258 | 1.27E-01 | 1.69E-02 | 2.41E+00 |
| 4                  | GO:0006950~response to stress                            | 3  | 18.75  | 1.40E-03 | AT1G20450, AT1G20440, AT3G50970                                                                                                               | 16 | 69   | 18499 | 50.26902 | 7.39E-02 | 1.27E-02 | 1.36E+00 |
| 4                  | GO:0009737~response to abscisic acid                     | 5  | 31.25  | 2.30E-04 | AT1G20450, AT1G20440, AT3G50970, AT2G42530, AT2G42540                                                                                         | 16 | 394  | 18499 | 14.67243 | 1.26E-02 | 2.52E-03 | 2.26E-01 |
| 4                  | GO:0009415~response to water                             | 3  | 18.75  | 4.03E-05 | AT1G20450, AT1G20440, AT3G50970                                                                                                               | 16 | 12   | 18499 | 289.0469 | 2.21E-03 | 5.54E-04 | 3.96E-02 |
| 4                  | GO:0009414~response to water deprivation                 | 7  | 43.75  | 4.98E-08 | AT1G20450, AT4G25480, AT4G25490, AT1G20440, AT3G50970, AT2G42530, AT3G07740, AT2G42540, AT3G55990                                             | 16 | 279  | 18499 | 29.00829 | 2.74E-06 | 9.13E-07 | 4.90E-05 |
| 4                  | GO:0009409~response to cold                              | 13 | 81.25  | 1.11E-19 | AT1G20450, AT5G59820, AT4G25480, AT4G25470, AT2G39810, AT4G25490, AT1G20440, AT2G22300, AT3G50970, AT2G42530, AT3G07740, AT2G42540, AT3G55990 | 16 | 299  | 18499 | 50.26902 | 6.09E-18 | 3.05E-18 | 1.09E-16 |
| 4                  | GO:0009631~cold acclimation                              | 10 | 62.50  | 2.15E-20 | AT4G16420, AT1G20450, AT5G59820, AT4G25480, AT4G25470, AT4G25490, AT1G20440, AT3G50970, AT2G42530, AT2G42540                                  | 16 | 51   | 18499 | 226.7034 | 1.18E-18 | 1.18E-18 | 2.12E-17 |
| 5                  | GO:0009651~response to salt stress                       | 4  | 66.67  | 1.71E-04 | AT4G01370, AT4G29810, AT2G43790, AT4G08500                                                                                                    | 6  | 484  | 18499 | 25.48072 | 1.00E-02 | 3.36E-03 | 1.71E-01 |
| 5                  | GO:0000165~MAPK cascade                                  | 3  | 50.00  | 1.10E-04 | AT4G01370, AT4G29810, AT4G08500                                                                                                               | 6  | 62   | 18499 | 149.1855 | 6.46E-03 | 3.23E-03 | 1.10E-01 |
| 5                  | GO:0009409~response to cold                              | 6  | 100.00 | 1.07E-09 | AT4G01370, AT4G10030, AT4G29810, AT1G74710, AT2G43790, AT4G08500                                                                              | 6  | 299  | 18499 | 61.86957 | 6.30E-08 | 6.30E-08 | 1.07E-06 |
| Cellular Component |                                                          |    |        |          |                                                                                                                                               |    |      |       |          |          |          |          |
| 1                  | GO:0008287~protein serine/threonine phosphatase complex  | 2  | 9.52   | 3.18E-03 | AT5G57050, AT4G26080                                                                                                                          | 21 | 4    | 25147 | 598.7381 | 7.06E-02 | 1.81E-02 | 2.49E+00 |
| 1                  | GO:0005829~cytosol                                       | 9  | 42.86  | 2.29E-04 | AT3G55440, AT1G79550, AT1G36160, AT1G36180, AT5G66400, AT4G33950, AT3G50500, AT5G66880, AT2G36530                                             | 21 | 2309 | 25147 | 4.667512 | 5.25E-03 | 1.75E-03 | 1.81E-01 |
| 1                  | GO:0005737~cytoplasm                                     | 13 | 61.90  | 2.57E-05 | AT1G16540, AT3G55440, AT4G17870, AT1G79550, AT1G36160, AT1G72770, AT1G36180, AT5G46790, AT4G26080, AT4G33950, AT3G50500, AT5G66880, AT2G36530 | 21 | 4407 | 25147 | 3.532378 | 5.91E-04 | 5.91E-04 | 2.04E-02 |
| 1                  | GO:0005886~plasma membrane                               | 12 | 57.14  | 3.20E-05 | AT3G55440, AT4G17870, AT5G54590, AT1G79550, AT1G36160, AT5G46790, AT4G26080, AT1G27320, AT3G50500, AT5G35750, AT1G16670, AT2G36530            | 21 | 3702 | 25147 | 3.881608 | 7.35E-04 | 3.68E-04 | 2.53E-02 |
| 4                  | GO:0005634~nucleus                                       | 13 | 81.25  | 1.46E-03 | AT4G16420, AT1G20450, AT5G59820, AT4G25480, AT4G25470, AT3G23250, AT2G39810, AT4G25490, AT1G20440, AT2G22300, AT3G07740, AT3G49530, AT3G55990 | 16 | 9796 | 25147 | 2.085743 | 1.74E-02 | 1.74E-02 | 9.38E-01 |
| Molecular Function |                                                          |    |        |          |                                                                                                                                               |    |      |       |          |          |          |          |
| 1                  | GO:0003989~acetyl-CoA carboxylase activity               | 2  | 9.52   | 7.30E-03 | AT1G36160, AT1G36180                                                                                                                          | 20 | 7    | 18171 | 259.5857 | 2.48E-01 | 4.65E-02 | 6.44E+00 |
| 1                  | GO:0004722~protein serine/threonine phosphatase activity | 3  | 14.29  | 1.06E-02 | AT5G57050, AT1G72770, AT4G26080                                                                                                               | 20 | 150  | 18171 | 18.171   | 3.39E-01 | 4.49E-02 | 9.20E+00 |
| 1                  | GO:0005524~ATP binding                                   | 8  | 38.10  | 7.70E-03 | AT5G54590, AT1G79550, AT1G36160, AT1G36180, AT4G33950, AT3G50500, AT1G16670, AT5G66880                                                        | 20 | 2372 | 18171 | 3.06425  | 2.60E-01 | 4.22E-02 | 6.79E+00 |
| 1                  | GO:0004674~protein serine/threonine kinase activity      | 5  | 23.81  | 8.66E-03 | AT5G54590, AT4G33950, AT3G50500, AT1G16670, AT5G66880                                                                                         | 20 | 804  | 18171 | 5.650187 | 2.88E-01 | 4.15E-02 | 7.61E+00 |
| 1                  | GO:0004075~biotin carboxylase activity                   | 2  | 9.52   | 5.22E-03 | AT1G36160, AT1G36180                                                                                                                          | 20 | 5    | 18171 | 363.42   | 1.85E-01 | 4.00E-02 | 4.65E+00 |
| 1                  | GO:0005034~osmosensor activity                           | 2  | 9.52   | 4.18E-03 | AT1G27320, AT5G35750                                                                                                                          | 20 | 4    | 18171 | 454.275  | 1.51E-01 | 4.00E-02 | 3.73E+00 |
| 1                  | GO:0009884~cytokinin receptor activity                   | 2  | 9.52   | 3.13E-03 | AT1G27320, AT5G35750                                                                                                                          | 20 | 3    | 18171 | 605.7    | 1.15E-01 | 4.00E-02 | 2.81E+00 |
| 1                  | GO:0004721~phosphoprotein phosphatase activity           | 3  | 14.29  | 1.77E-03 | AT4G26080, AT1G27320, AT5G35750                                                                                                               | 20 | 60   | 18171 | 45.4275  | 6.67E-02 | 3.39E-02 | 1.60E+00 |
| 1                  | GO:0005515~protein binding                               | 11 | 52.38  | 5.82E-06 | AT5G57050, AT4G17870, AT5G54590, AT1G72770, AT5G46790, AT4G26080, AT1G27320, AT4G33950, AT3G50500, AT5G35750, AT5G66880                       | 20 | 1901 | 18171 | 5.257259 | 2.27E-04 | 2.27E-04 | 5.29E-03 |
| 2                  | GO:0000166~nucleotide binding                            | 4  | 30.77  | 2.96E-03 | AT1G06960, AT3G52150, AT4G13850, AT4G24770                                                                                                    | 12 | 504  | 18171 | 12.01786 | 6.04E-02 | 1.03E-02 | 2.27E+00 |
| 2                  | GO:0000339~RNA cap binding                               | 2  | 15.38  | 3.02E-03 | AT3G14080, AT1G19120                                                                                                                          | 12 | 5    | 18171 | 605.7    | 6.16E-02 | 9.04E-03 | 2.31E+00 |
| 2                  | GO:0003690~double-stranded DNA binding                   | 3  | 23.08  | 8.55E-04 | AT4G13850, AT4G38680, AT4G36020                                                                                                               | 12 | 73   | 18171 | 62.22945 | 1.78E-02 | 3.59E-03 | 6.58E-01 |
| 2                  | GO:0003697~single-stranded DNA binding                   | 3  | 23.08  | 5.79E-04 | AT4G13850, AT4G38680, AT4G36020                                                                                                               | 12 | 60   | 18171 | 75.7125  | 1.21E-02 | 3.03E-03 | 4.46E-01 |
| 2                  | GO:0003729~mRNA binding                                  | 5  | 38.46  | 4.06E-05 | AT1G56070, AT4G38680, AT4G24770, AT4G36020, AT2G17870                                                                                         | 12 | 351  | 18171 | 21.57051 | 8.52E-04 | 2.84E-04 | 3.13E-02 |
| 2                  | GO:0003676~nucleic acid binding                          | 6  | 46.15  | 1.70E-05 | AT3G52150, AT4G13850, AT4G38680, AT4G24770, AT4G36020, AT2G17870                                                                              | 12 | 615  | 18171 | 14.77317 | 3.58E-04 | 1.79E-04 | 1.32E-02 |

|   |                                                                         |   |       |          |                                                                                        |    |      |       |          |          |          |          |
|---|-------------------------------------------------------------------------|---|-------|----------|----------------------------------------------------------------------------------------|----|------|-------|----------|----------|----------|----------|
| 2 | GO:0003723~RNA binding                                                  | 8 | 61.54 | 6.73E-08 | AT1G06960, AT3G52150, AT3G14080, AT4G13850, AT1G19120, AT4G24770, AT4G36020, AT2G17870 | 12 | 769  | 18171 | 15.75293 | 1.41E-06 | 1.41E-06 | 5.20E-05 |
| 4 | GO:0005534~galactose binding                                            | 2 | 12.50 | 1.43E-03 | AT2G42530, AT2G42540                                                                   | 14 | 2    | 18171 | 1297.929 | 2.96E-02 | 1.49E-02 | 1.10E+00 |
| 4 | GO:0003677~DNA binding                                                  | 7 | 43.75 | 1.72E-03 | AT4G16420, AT4G25480, AT4G25470, AT3G23250, AT4G25490, AT3G49530, AT3G07740            | 14 | 2047 | 18171 | 4.438447 | 3.56E-02 | 1.20E-02 | 1.32E+00 |
| 4 | GO:0003700~transcription factor activity, sequence-specific DNA binding | 8 | 50.00 | 6.67E-05 | AT4G16420, AT5G59820, AT4G25480, AT4G25470, AT3G23250, AT4G25490, AT3G49530, AT3G07740 | 14 | 1711 | 18171 | 6.068632 | 1.40E-03 | 1.40E-03 | 5.15E-02 |
| 5 | GO:0005515~protein binding                                              | 4 | 66.67 | 9.72E-03 | AT4G01370, AT4G29810, AT2G43790, AT4G08500                                             | 6  | 1901 | 18171 | 6.372436 | 1.19E-01 | 4.14E-02 | 6.26E+00 |
| 5 | GO:0004707~MAP kinase activity                                          | 2 | 33.33 | 6.31E-03 | AT4G01370, AT2G43790                                                                   | 6  | 23   | 18171 | 263.3478 | 7.90E-02 | 4.03E-02 | 4.11E+00 |
| 5 | GO:0016301~kinase activity                                              | 4 | 66.67 | 1.71E-03 | AT4G01370, AT4G29810, AT2G43790, AT4G08500                                             | 6  | 1039 | 18171 | 11.65929 | 2.20E-02 | 2.20E-02 | 1.13E+00 |

**Table S9.** Gene ontology terms associated with specific gene clusters in the light stress associated gene network obtained using DAVID server. The description of the columns as in Table S7.

| Cluster                   | Term                                                                              | Count | %     | PValue   | Genes                                                                                                                                                                                     | List Total | Pop Hits | Pop Total | Fold Enrichment | Bonferroni | Benjamini | FDR      |
|---------------------------|-----------------------------------------------------------------------------------|-------|-------|----------|-------------------------------------------------------------------------------------------------------------------------------------------------------------------------------------------|------------|----------|-----------|-----------------|------------|-----------|----------|
| <b>Biological Process</b> |                                                                                   |       |       |          |                                                                                                                                                                                           |            |          |           |                 |            |           |          |
| 1                         | GO:1902347~response to strigolactone                                              | 2     | 5.88  | 1.03E-02 | AT4G08920, AT1G04400                                                                                                                                                                      | 33         | 6        | 18499     | 186.8586        | 7.85E-01   | 4.55E-02  | 1.16E+01 |
| 1                         | GO:0031048~chromatin silencing by small RNA                                       | 2     | 5.88  | 1.03E-02 | AT2G37678, AT5G02200                                                                                                                                                                      | 33         | 6        | 18499     | 186.8586        | 7.85E-01   | 4.55E-02  | 1.16E+01 |
| 1                         | GO:0009649~entrainment of circadian clock                                         | 2     | 5.88  | 8.62E-03 | AT2G18790, AT2G40080                                                                                                                                                                      | 33         | 5        | 18499     | 224.2303        | 7.22E-01   | 3.93E-02  | 9.80E+00 |
| 1                         | GO:0051457~maintenance of protein location in nucleus                             | 2     | 5.88  | 5.18E-03 | AT2G37678, AT5G02200                                                                                                                                                                      | 33         | 3        | 18499     | 373.7172        | 5.36E-01   | 2.45E-02  | 6.00E+00 |
| 1                         | GO:0010362~negative regulation of anion channel activity by blue light            | 2     | 5.88  | 3.46E-03 | AT3G45780, AT5G58140                                                                                                                                                                      | 33         | 2        | 18499     | 560.5758        | 4.01E-01   | 1.69E-02  | 4.04E+00 |
| 1                         | GO:1901371~regulation of leaf morphogenesis                                       | 2     | 5.88  | 3.46E-03 | AT4G08920, AT1G04400                                                                                                                                                                      | 33         | 2        | 18499     | 560.5758        | 4.01E-01   | 1.69E-02  | 4.04E+00 |
| 1                         | GO:0072387~flavin adenine dinucleotide metabolic process                          | 2     | 5.88  | 3.46E-03 | AT4G08920, AT1G04400                                                                                                                                                                      | 33         | 2        | 18499     | 560.5758        | 4.01E-01   | 1.69E-02  | 4.04E+00 |
| 1                         | GO:0010029~regulation of seed germination                                         | 3     | 8.82  | 2.17E-03 | AT2G37678, AT2G20180, AT2G18790                                                                                                                                                           | 33         | 40       | 18499     | 42.04318        | 2.75E-01   | 1.10E-02  | 2.56E+00 |
| 1                         | GO:0010118~stomatal movement                                                      | 3     | 8.82  | 1.14E-03 | AT4G08920, AT5G58140, AT1G04400                                                                                                                                                           | 33         | 29       | 18499     | 57.9906         | 1.56E-01   | 6.03E-03  | 1.35E+00 |
| 1                         | GO:0009646~response to absence of light                                           | 3     | 8.82  | 9.18E-04 | AT2G37678, AT4G08920, AT1G04400                                                                                                                                                           | 33         | 26       | 18499     | 64.68182        | 1.27E-01   | 5.02E-03  | 1.09E+00 |
| 1                         | GO:0045893~positive regulation of transcription, DNA-templated                    | 5     | 14.71 | 5.12E-04 | AT5G24120, AT2G37678, AT4G15090, AT5G02200, AT4G25560                                                                                                                                     | 33         | 217      | 18499     | 12.91649        | 7.30E-02   | 2.91E-03  | 6.08E-01 |
| 1                         | GO:0009908~flower development                                                     | 5     | 14.71 | 3.91E-04 | AT1G22770, AT1G68050, AT5G57360, AT4G34530, AT2G40080                                                                                                                                     | 33         | 202      | 18499     | 13.87564        | 5.62E-02   | 2.31E-03  | 4.64E-01 |
| 1                         | GO:0009704~de-etiolation                                                          | 3     | 8.82  | 1.58E-04 | AT5G61270, AT2G43010, AT1G09530                                                                                                                                                           | 33         | 11       | 18499     | 152.8843        | 2.31E-02   | 9.73E-04  | 1.88E-01 |
| 1                         | GO:0000160~phosphorelay signal transduction system                                | 4     | 11.76 | 9.25E-05 | AT1G10470, AT3G45780, AT1G59940, AT5G58140                                                                                                                                                | 33         | 51       | 18499     | 43.96673        | 1.36E-02   | 5.95E-04  | 1.10E-01 |
| 1                         | GO:0009911~positive regulation of flower development                              | 4     | 11.76 | 4.12E-05 | AT1G68050, AT1G26260, AT4G34530, AT1G04400                                                                                                                                                | 33         | 39       | 18499     | 57.49495        | 6.08E-03   | 2.77E-04  | 4.91E-02 |
| 1                         | GO:0009639~response to red or far red light                                       | 4     | 11.76 | 3.23E-05 | AT2G37678, AT1G09530, AT4G15090, AT4G25560                                                                                                                                                | 33         | 36       | 18499     | 62.2862         | 4.77E-03   | 2.28E-04  | 3.85E-02 |
| 1                         | GO:0017006~protein-tetrapyrrole linkage                                           | 3     | 8.82  | 2.89E-05 | AT4G16250, AT2G18790, AT1G09570                                                                                                                                                           | 33         | 5        | 18499     | 336.3455        | 4.27E-03   | 2.14E-04  | 3.44E-02 |
| 1                         | GO:0009584~detection of visible light                                             | 3     | 8.82  | 2.89E-05 | AT4G16250, AT2G18790, AT1G09570                                                                                                                                                           | 33         | 5        | 18499     | 336.3455        | 4.27E-03   | 2.14E-04  | 3.44E-02 |
| 1                         | GO:0009416~response to light stimulus                                             | 6     | 17.65 | 1.66E-05 | AT5G64330, AT1G26945, AT2G37678, AT4G08920, AT5G61270, AT1G04400                                                                                                                          | 33         | 188      | 18499     | 17.89072        | 2.45E-03   | 1.29E-04  | 1.97E-02 |
| 1                         | GO:0010617~circadian regulation of calcium ion oscillation                        | 3     | 8.82  | 8.69E-06 | AT4G08920, AT2G18790, AT1G04400                                                                                                                                                           | 33         | 3        | 18499     | 560.5758        | 1.28E-03   | 7.14E-05  | 1.03E-02 |
| 1                         | GO:2000028~regulation of photoperiodism, flowering                                | 4     | 11.76 | 5.25E-06 | AT1G22770, AT2G46340, AT2G18790, AT1G04400                                                                                                                                                | 33         | 20       | 18499     | 112.1152        | 7.77E-04   | 4.57E-05  | 6.26E-03 |
| 1                         | GO:0046777~protein autophosphorylation                                            | 6     | 17.65 | 3.30E-06 | AT1G10470, AT4G08920, AT3G45780, AT4G28860, AT5G58140, AT1G04400                                                                                                                          | 33         | 135      | 18499     | 24.91448        | 4.89E-04   | 3.05E-05  | 3.93E-03 |
| 1                         | GO:0010244~response to low fluence blue light stimulus by blue low-fluence system | 4     | 11.76 | 3.92E-07 | AT4G08920, AT2G43010, AT2G18790, AT1G04400                                                                                                                                                | 33         | 9        | 18499     | 249.1448        | 5.80E-05   | 3.87E-06  | 4.67E-04 |
| 1                         | GO:0006351~transcription, DNA-templated                                           | 16    | 47.06 | 1.33E-07 | AT1G26945, AT2G37678, AT1G26260, AT2G20180, AT1G02340, AT4G16250, AT2G43010, AT1G09530, AT5G02200, AT1G09570, AT4G34530, AT4G25560, AT1G10470, AT5G61270, AT1G59940, AT2G18790            | 33         | 1886     | 18499     | 4.75568         | 1.96E-05   | 1.40E-06  | 1.58E-04 |
| 1                         | GO:0006355~regulation of transcription, DNA-templated                             | 17    | 50.00 | 8.25E-08 | AT1G26945, AT1G26260, AT2G20180, AT4G16250, AT1G02340, AT2G43010, AT1G09530, AT4G34530, AT1G09570, AT4G25560, AT1G10470, AT5G24120, AT1G22770, AT1G68050, AT5G61270, AT1G59940, AT2G18790 | 33         | 2119     | 18499     | 4.497304        | 1.22E-05   | 9.39E-07  | 9.82E-05 |
| 1                         | GO:0042752~regulation of circadian rhythm                                         | 6     | 17.65 | 4.64E-10 | AT1G22770, AT1G10470, AT5G57360, AT4G08920, AT1G59940, AT1G04400                                                                                                                          | 33         | 24       | 18499     | 140.1439        | 6.86E-08   | 5.72E-09  | 5.52E-07 |
| 1                         | GO:0009640~photomorphogenesis                                                     | 7     | 20.59 | 3.97E-10 | AT4G28880, AT2G37678, AT4G08920, AT4G28860, AT2G46340, AT2G18790, AT1G09570                                                                                                               | 33         | 54       | 18499     | 72.66723        | 5.88E-08   | 5.34E-09  | 4.73E-07 |
| 1                         | GO:0010114~response to red light                                                  | 8     | 23.53 | 6.48E-12 | AT5G24120, AT1G10470, AT2G37678, AT5G57360, AT4G08920, AT1G59940, AT2G46340, AT2G40080                                                                                                    | 33         | 58       | 18499     | 77.32079        | 9.60E-10   | 9.60E-11  | 7.73E-09 |
| 1                         | GO:0007623~circadian rhythm                                                       | 9     | 26.47 | 4.04E-12 | AT1G22770, AT1G10470, AT1G68050, AT5G57360, AT4G08920, AT3G45780, AT1G59940, AT5G58140, AT1G04400                                                                                         | 33         | 97       | 18499     | 52.01218        | 5.98E-10   | 6.64E-11  | 4.81E-09 |
| 1                         | GO:0010017~red or far-red light signaling pathway                                 | 7     | 20.59 | 2.82E-12 | AT1G10470, AT4G16250, AT2G43010, AT1G09530, AT2G46340, AT4G15090, AT2G40080                                                                                                               | 33         | 25       | 18499     | 156.9612        | 4.17E-10   | 5.22E-11  | 3.36E-09 |
| 1                         | GO:0010161~red light signaling pathway                                            | 6     | 17.65 | 1.40E-12 | AT2G20180, AT2G43010, AT1G59940, AT2G18790, AT1G09570, AT5G49230                                                                                                                          | 33         | 9        | 18499     | 373.7172        | 2.07E-10   | 2.96E-11  | 1.67E-09 |
| 1                         | GO:0009638~phototropism                                                           | 7     | 20.59 | 1.99E-13 | AT5G64330, AT4G08920, AT3G45780, AT5G58140, AT2G18790, AT1G09570, AT1G04400                                                                                                               | 33         | 17       | 18499     | 230.8253        | 2.94E-11   | 4.91E-12  | 2.37E-10 |
| 1                         | GO:0018298~protein-chromophore linkage                                            | 9     | 26.47 | 6.36E-15 | AT1G68050, AT5G57360, AT4G08920, AT3G45780, AT4G16250, AT5G58140, AT2G18790, AT1G09570, AT1G04400                                                                                         | 33         | 45       | 18499     | 112.1152        | 9.37E-13   | 1.87E-13  | 7.54E-12 |
| 1                         | GO:0010218~response to far red light                                              | 10    | 29.41 | 7.86E-17 | AT1G22770, AT5G24120, AT2G37678, AT4G08920, AT1G02340, AT2G46340                                                                                                                          | 33         | 49       | 18499     | 114.4032        | 1.64E-14   | 4.11E-15  | 1.33E-13 |

|                    |                                                                                   |    |        |          |                                                                                                                                                                                           |    |      |       |          |          |          |          |
|--------------------|-----------------------------------------------------------------------------------|----|--------|----------|-------------------------------------------------------------------------------------------------------------------------------------------------------------------------------------------|----|------|-------|----------|----------|----------|----------|
|                    |                                                                                   |    |        |          | AT4G15090, AT5G02200, AT2G18790, AT1G09570                                                                                                                                                |    |      |       |          |          |          |          |
| 1                  | GO:0009785~blue light signaling pathway                                           | 9  | 26.47  | 1.34E-18 | AT5G64330, AT4G28880, AT4G08920, AT3G45780, AT1G02340, AT4G28860, AT5G63870, AT1G04400, AT5G49230                                                                                         | 33 | 18   | 18499 | 280.2879 | 1.98E-16 | 6.60E-17 | 1.59E-15 |
| 1                  | GO:0009585~red, far-red light phototransduction                                   | 12 | 35.29  | 2.85E-20 | AT1G22770, AT4G16250, AT1G02340, AT5G61270, AT2G43010, AT1G09530, AT2G46340, AT4G15090, AT2G18790, AT1G09570, AT2G40080, AT4G25560                                                        | 33 | 62   | 18499 | 108.4985 | 4.22E-18 | 2.11E-18 | 3.40E-17 |
| 1                  | GO:0009637~response to blue light                                                 | 13 | 38.24  | 1.34E-23 | AT4G28880, AT1G26260, AT4G08920, AT4G28860, AT5G02200, AT4G34530, AT5G24120, AT1G22770, AT1G68050, AT3G45780, AT5G58140, AT2G46340, AT1G04400                                             | 33 | 52   | 18499 | 140.1439 | 1.98E-21 | 1.98E-21 | 1.59E-20 |
| 2                  | GO:0009637~response to blue light                                                 | 2  | 50.00  | 8.41E-03 | AT2G36910, AT3G28860                                                                                                                                                                      | 4  | 52   | 18499 | 177.875  | 2.75E-01 | 2.12E-02 | 7.35E+00 |
| 2                  | GO:0009640~photomorphogenesis                                                     | 2  | 50.00  | 8.73E-03 | AT2G36910, AT3G28860                                                                                                                                                                      | 4  | 54   | 18499 | 171.287  | 2.83E-01 | 2.06E-02 | 7.62E+00 |
| 2                  | GO:0048527~lateral root development                                               | 2  | 50.00  | 7.60E-03 | AT5G20730, AT3G28860                                                                                                                                                                      | 4  | 47   | 18499 | 196.7979 | 2.52E-01 | 2.05E-02 | 6.66E+00 |
| 2                  | GO:0009639~response to red or far red light                                       | 2  | 50.00  | 5.83E-03 | AT2G36910, AT3G28860                                                                                                                                                                      | 4  | 36   | 18499 | 256.9306 | 1.99E-01 | 1.83E-02 | 5.14E+00 |
| 2                  | GO:0010540~basipetal auxin transport                                              | 2  | 50.00  | 5.18E-03 | AT2G36910, AT3G28860                                                                                                                                                                      | 4  | 32   | 18499 | 289.0469 | 1.79E-01 | 1.78E-02 | 4.59E+00 |
| 2                  | GO:0009630~gravitropism                                                           | 2  | 50.00  | 5.99E-03 | AT5G20730, AT1G70940                                                                                                                                                                      | 4  | 37   | 18499 | 249.9865 | 2.04E-01 | 1.74E-02 | 5.28E+00 |
| 2                  | GO:0048443~stamen development                                                     | 2  | 50.00  | 3.73E-03 | AT2G36910, AT3G28860                                                                                                                                                                      | 4  | 23   | 18499 | 402.1522 | 1.32E-01 | 1.41E-02 | 3.32E+00 |
| 2                  | GO:0010315~auxin efflux                                                           | 2  | 50.00  | 3.24E-03 | AT2G36910, AT1G70940                                                                                                                                                                      | 4  | 20   | 18499 | 462.475  | 1.16E-01 | 1.36E-02 | 2.89E+00 |
| 2                  | GO:0008361~regulation of cell size                                                | 2  | 50.00  | 2.43E-03 | AT2G36910, AT3G28860                                                                                                                                                                      | 4  | 15   | 18499 | 616.6333 | 8.83E-02 | 1.31E-02 | 2.18E+00 |
| 2                  | GO:0010541~acropetal auxin transport                                              | 2  | 50.00  | 2.59E-03 | AT2G36910, AT3G28860                                                                                                                                                                      | 4  | 16   | 18499 | 578.0938 | 9.39E-02 | 1.23E-02 | 2.32E+00 |
| 2                  | GO:0009733~response to auxin                                                      | 3  | 75.00  | 7.27E-04 | AT2G36910, AT5G20730, AT3G28860                                                                                                                                                           | 4  | 290  | 18499 | 47.84224 | 2.73E-02 | 5.51E-03 | 6.55E-01 |
| 2                  | GO:0043481~anthocyanin accumulation in tissues in response to UV light            | 2  | 50.00  | 8.11E-04 | AT2G36910, AT3G28860                                                                                                                                                                      | 4  | 5    | 18499 | 1849.9   | 3.03E-02 | 5.12E-03 | 7.30E-01 |
| 2                  | GO:0055085~transmembrane transport                                                | 3  | 75.00  | 3.89E-04 | AT2G36910, AT3G28860, AT1G70940                                                                                                                                                           | 4  | 212  | 18499 | 65.44458 | 1.47E-02 | 3.69E-03 | 3.51E-01 |
| 2                  | GO:0009926~auxin polar transport                                                  | 3  | 75.00  | 2.69E-05 | AT2G36910, AT3G28860, AT1G70940                                                                                                                                                           | 4  | 56   | 18499 | 247.7545 | 1.02E-03 | 3.41E-04 | 2.44E-02 |
| 2                  | GO:0009958~positive gravitropism                                                  | 3  | 75.00  | 9.25E-06 | AT2G36910, AT3G28860, AT1G70940                                                                                                                                                           | 4  | 33   | 18499 | 420.4318 | 3.51E-04 | 1.76E-04 | 8.36E-03 |
| 2                  | GO:0009734~auxin-activated signaling pathway                                      | 4  | 100.00 | 1.07E-06 | AT2G36910, AT5G20730, AT3G28860, AT1G70940                                                                                                                                                | 4  | 190  | 18499 | 97.36316 | 4.05E-05 | 4.05E-05 | 9.64E-04 |
| 3                  | GO:0072593~reactive oxygen species metabolic process                              | 2  | 33.33  | 4.32E-03 | AT4G34460, AT2G26300                                                                                                                                                                      | 6  | 16   | 18499 | 385.3958 | 1.98E-01 | 2.42E-02 | 4.10E+00 |
| 3                  | GO:0009094~L-phenylalanine biosynthetic process                                   | 2  | 33.33  | 2.43E-03 | AT2G26300, AT1G48270                                                                                                                                                                      | 6  | 9    | 18499 | 685.1481 | 1.17E-01 | 1.76E-02 | 2.33E+00 |
| 3                  | GO:0007186~G-protein coupled receptor signaling pathway                           | 2  | 33.33  | 2.70E-03 | AT2G26300, AT1G48270                                                                                                                                                                      | 6  | 10   | 18499 | 616.6333 | 1.29E-01 | 1.71E-02 | 2.58E+00 |
| 3                  | GO:0006571~tyrosine biosynthetic process                                          | 2  | 33.33  | 1.35E-03 | AT2G26300, AT1G48270                                                                                                                                                                      | 6  | 5    | 18499 | 1233.267 | 6.66E-02 | 1.14E-02 | 1.30E+00 |
| 3                  | GO:0009845~seed germination                                                       | 3  | 50.00  | 1.70E-04 | AT4G34460, AT2G26300, AT1G48270                                                                                                                                                           | 6  | 77   | 18499 | 120.1234 | 8.61E-03 | 1.73E-03 | 1.64E-01 |
| 3                  | GO:0005834~heterotrimeric G-protein complex                                       | 3  | 50.00  | 7.82E-05 | AT4G34460, AT1G53090, AT2G26300                                                                                                                                                           | 6  | 71   | 25147 | 177.0915 | 1.09E-03 | 1.09E-03 | 5.31E-02 |
| 3                  | GO:0009788~negative regulation of abscisic acid-activated signaling pathway       | 3  | 50.00  | 4.31E-05 | AT4G34460, AT2G26300, AT1G48270                                                                                                                                                           | 6  | 39   | 18499 | 237.1667 | 2.20E-03 | 5.50E-04 | 4.17E-02 |
| 3                  | GO:0009785~blue light signaling pathway                                           | 3  | 50.00  | 8.93E-06 | AT2G26300, AT3G59220, AT1G48270                                                                                                                                                           | 6  | 18   | 18499 | 513.8611 | 4.55E-04 | 2.28E-04 | 8.64E-03 |
| 3                  | GO:0009738~abscisic acid-activated signaling pathway                              | 4  | 66.67  | 1.14E-05 | AT4G34460, AT2G26300, AT3G59220, AT1G48270                                                                                                                                                | 6  | 195  | 18499 | 63.24444 | 5.79E-04 | 1.93E-04 | 1.10E-02 |
| 3                  | GO:0010244~response to low fluence blue light stimulus by blue low-fluence system | 3  | 50.00  | 2.10E-06 | AT2G26300, AT3G59220, AT1G48270                                                                                                                                                           | 6  | 9    | 18499 | 1027.722 | 1.07E-04 | 1.07E-04 | 2.03E-03 |
| 4                  | GO:0007049~cell cycle                                                             | 4  | 40.00  | 2.28E-05 | AT1G18040, AT5G27620, AT1G66750, AT4G30820                                                                                                                                                | 10 | 122  | 18499 | 60.65246 | 1.21E-03 | 1.21E-03 | 2.23E-02 |
| 5                  | GO:0009637~response to blue light                                                 | 3  | 60.00  | 4.63E-05 | AT1G42550, AT5G38150, AT1G66840                                                                                                                                                           | 5  | 52   | 18499 | 213.45   | 1.20E-03 | 4.01E-04 | 3.80E-02 |
| 5                  | GO:0009904~chloroplast accumulation movement                                      | 3  | 60.00  | 6.65E-06 | AT5G38150, AT1G75100, AT1G66840                                                                                                                                                           | 5  | 20   | 18499 | 554.97   | 1.73E-04 | 8.65E-05 | 5.46E-03 |
| 5                  | GO:0009903~chloroplast avoidance movement                                         | 4  | 80.00  | 7.67E-09 | AT1G42550, AT5G38150, AT1G75100, AT1G66840                                                                                                                                                | 5  | 24   | 18499 | 616.6333 | 1.99E-07 | 1.99E-07 | 6.29E-06 |
| 6                  | GO:0009231~riboflavin biosynthetic process                                        | 5  | 83.33  | 5.07E-13 | AT2G44050, AT3G47390, AT5G64300, AT5G59750, AT2G22450                                                                                                                                     | 6  | 12   | 18499 | 1284.653 | 6.59E-12 | 6.59E-12 | 3.36E-10 |
| Cellular Component |                                                                                   |    |        |          |                                                                                                                                                                                           |    |      |       |          |          |          |          |
| 1                  | GO:0009898~cytoplasmic side of plasma membrane                                    | 2  | 5.88   | 1.05E-02 | AT3G45780, AT5G58140                                                                                                                                                                      | 34 | 8    | 25147 | 184.9044 | 2.06E-01 | 3.25E-02 | 7.89E+00 |
| 1                  | GO:0005622~intracellular                                                          | 7  | 20.59  | 1.55E-04 | AT1G10470, AT3G45780, AT4G16250, AT1G59940, AT5G58140, AT2G18790, AT1G09570                                                                                                               | 34 | 634  | 25147 | 8.166125 | 3.41E-03 | 5.70E-04 | 1.22E-01 |
| 1                  | GO:0005737~cytoplasm                                                              | 17 | 50.00  | 4.34E-05 | AT4G28880, AT1G26945, AT2G37678, AT5G57360, AT4G08920, AT2G47700, AT4G28860, AT5G02200, AT5G63870, AT1G09570, AT1G22770, AT1G10470, AT1G68050, AT3G45780, AT1G59940, AT5G58140, AT1G04400 | 34 | 4407 | 25147 | 2.853075 | 9.55E-04 | 1.91E-04 | 3.40E-02 |
| 1                  | GO:0016605~PML body                                                               | 3  | 8.82   | 1.00E-05 | AT4G08920, AT2G46340, AT1G04400                                                                                                                                                           | 34 | 4    | 25147 | 554.7132 | 2.20E-04 | 5.50E-05 | 7.83E-03 |

|                    |                                                                         |    |        |          |                                                                                                                                                                                                                                                                                                                                                                |    |      |       |          |          |          |          |
|--------------------|-------------------------------------------------------------------------|----|--------|----------|----------------------------------------------------------------------------------------------------------------------------------------------------------------------------------------------------------------------------------------------------------------------------------------------------------------------------------------------------------------|----|------|-------|----------|----------|----------|----------|
| 1                  | GO:0016607~nuclear speck                                                | 6  | 17.65  | 3.23E-08 | AT5G61270, AT2G46340, AT5G02200, AT2G18790, AT1G09570, AT4G25560                                                                                                                                                                                                                                                                                               | 34 | 70   | 25147 | 63.3958  | 7.10E-07 | 2.37E-07 | 2.53E-05 |
| 1                  | GO:0005634~nucleus                                                      | 32 | 94.12  | 4.05E-11 | AT4G28880, AT1G26945, AT1G26260, AT4G08920, AT2G20180, AT4G16250, AT4G28860, AT2G43010, AT5G63870, AT1G09570, AT1G22770, AT1G68050, AT3G45780, AT1G59940, AT5G58140, AT2G46340, AT2G18790, AT1G04400, AT2G40080, AT5G49230, AT2G37678, AT5G57360, AT1G02340, AT1G09530, AT5G02200, AT4G34530, AT4G25560, AT1G10470, AT5G64330, AT5G61270, AT5G61230, AT4G15090 | 34 | 9796 | 25147 | 2.416064 | 8.90E-10 | 4.45E-10 | 3.17E-08 |
| 1                  | GO:0016604~nuclear body                                                 | 6  | 17.65  | 1.73E-11 | AT2G37678, AT4G08920, AT2G46340, AT2G18790, AT1G09570, AT1G04400                                                                                                                                                                                                                                                                                               | 34 | 17   | 25147 | 261.0415 | 3.81E-10 | 3.81E-10 | 1.36E-08 |
| 5                  | GO:0005623~cell                                                         | 3  | 60.00  | 3.44E-04 | AT1G42550, AT5G38150, AT1G66840                                                                                                                                                                                                                                                                                                                                | 5  | 192  | 25147 | 78.58438 | 3.10E-03 | 3.10E-03 | 1.98E-01 |
| 6                  | GO:0009570~chloroplast stroma                                           | 3  | 50.00  | 6.39E-03 | AT1G79440, AT2G44050, AT5G64300                                                                                                                                                                                                                                                                                                                                | 6  | 653  | 25147 | 19.25498 | 3.77E-02 | 1.91E-02 | 3.02E+00 |
| 6                  | GO:0009507~chloroplast                                                  | 6  | 100.00 | 8.45E-05 | AT1G79440, AT2G44050, AT3G47390, AT5G64300, AT5G59750, AT2G22450                                                                                                                                                                                                                                                                                               | 6  | 3855 | 25147 | 6.523217 | 5.07E-04 | 5.07E-04 | 4.04E-02 |
| Molecular Function |                                                                         |    |        |          |                                                                                                                                                                                                                                                                                                                                                                |    |      |       |          |          |          |          |
| 1                  | GO:0042802~identical protein binding                                    | 3  | 8.82   | 7.11E-03 | AT4G08920, AT3G45780, AT5G58140                                                                                                                                                                                                                                                                                                                                | 33 | 72   | 18171 | 22.94318 | 2.59E-01 | 2.47E-02 | 6.39E+00 |
| 1                  | GO:0031516~far-red light photoreceptor activity                         | 2  | 5.88   | 3.52E-03 | AT2G18790, AT1G09570                                                                                                                                                                                                                                                                                                                                           | 33 | 2    | 18171 | 550.6364 | 1.38E-01 | 1.34E-02 | 3.21E+00 |
| 1                  | GO:0003700~transcription factor activity, sequence-specific DNA binding | 10 | 29.41  | 2.16E-03 | AT5G24120, AT1G26260, AT2G20180, AT1G02340, AT5G61270, AT2G43010, AT1G09530, AT4G15090, AT4G34530, AT4G25560                                                                                                                                                                                                                                                   | 33 | 1711 | 18171 | 3.218214 | 8.68E-02 | 9.04E-03 | 1.98E+00 |
| 1                  | GO:0004871~signal transducer activity                                   | 5  | 14.71  | 1.34E-04 | AT5G64330, AT4G16250, AT2G46340, AT2G18790, AT1G09570                                                                                                                                                                                                                                                                                                          | 33 | 150  | 18171 | 18.35455 | 5.61E-03 | 6.25E-04 | 1.24E-01 |
| 1                  | GO:0008020~G-protein coupled photoreceptor activity                     | 3  | 8.82   | 1.80E-05 | AT4G16250, AT2G18790, AT1G09570                                                                                                                                                                                                                                                                                                                                | 33 | 4    | 18171 | 412.9773 | 7.55E-04 | 9.44E-05 | 1.66E-02 |
| 1                  | GO:0009883~red or far-red light photoreceptor activity                  | 3  | 8.82   | 9.00E-06 | AT4G16250, AT2G18790, AT1G09570                                                                                                                                                                                                                                                                                                                                | 33 | 3    | 18171 | 550.6364 | 3.78E-04 | 5.40E-05 | 8.33E-03 |
| 1                  | GO:0046983~protein dimerization activity                                | 8  | 23.53  | 1.26E-06 | AT1G26945, AT1G26260, AT2G20180, AT1G02340, AT5G61270, AT2G43010, AT1G09530, AT4G34530                                                                                                                                                                                                                                                                         | 33 | 325  | 18171 | 13.55413 | 5.28E-05 | 8.81E-06 | 1.16E-03 |
| 1                  | GO:0000155~phosphorelay sensor kinase activity                          | 5  | 14.71  | 3.01E-08 | AT3G45780, AT4G16250, AT5G58140, AT2G18790, AT1G09570                                                                                                                                                                                                                                                                                                          | 33 | 19   | 18171 | 144.9043 | 1.27E-06 | 2.53E-07 | 2.79E-05 |
| 1                  | GO:0042803~protein homodimerization activity                            | 8  | 23.53  | 2.19E-08 | AT2G37678, AT4G08920, AT4G16250, AT5G02200, AT2G18790, AT1G09570, AT1G04400, AT2G40080                                                                                                                                                                                                                                                                         | 33 | 179  | 18171 | 24.60945 | 9.19E-07 | 2.30E-07 | 2.03E-05 |
| 1                  | GO:0009881~photoreceptor activity                                       | 5  | 14.71  | 3.88E-09 | AT1G68050, AT5G57360, AT4G16250, AT2G18790, AT1G09570                                                                                                                                                                                                                                                                                                          | 33 | 12   | 18171 | 229.4318 | 1.63E-07 | 5.43E-08 | 3.59E-06 |
| 1                  | GO:0009882~blue light photoreceptor activity                            | 5  | 14.71  | 3.95E-11 | AT5G57360, AT4G08920, AT3G45780, AT5G58140, AT1G04400                                                                                                                                                                                                                                                                                                          | 33 | 5    | 18171 | 550.6364 | 1.66E-09 | 8.30E-10 | 3.66E-08 |
| 1                  | GO:0005515~protein binding                                              | 22 | 64.71  | 9.61E-14 | AT4G28880, AT1G26260, AT5G57360, AT4G08920, AT2G20180, AT4G16250, AT1G02340, AT4G28860, AT2G43010, AT1G09530, AT5G02200, AT4G34530, AT1G09570, AT4G25560, AT1G22770, AT1G10470, AT5G64330, AT1G68050, AT3G45780, AT2G46340, AT2G18790, AT1G04400                                                                                                               | 33 | 1901 | 18171 | 6.372436 | 4.03E-12 | 4.03E-12 | 8.89E-11 |
| 2                  | GO:0010329~auxin efflux transmembrane transporter activity              | 3  | 75.00  | 7.90E-06 | AT2G36910, AT3G28860, AT1G70940                                                                                                                                                                                                                                                                                                                                | 4  | 30   | 18171 | 454.275  | 7.11E-05 | 7.11E-05 | 4.54E-03 |
| 3                  | GO:0004871~signal transducer activity                                   | 3  | 50.00  | 6.66E-04 | AT4G34460, AT1G53090, AT2G26300                                                                                                                                                                                                                                                                                                                                | 6  | 150  | 18171 | 60.57    | 9.28E-03 | 4.65E-03 | 4.52E-01 |
| 3                  | GO:0005515~protein binding                                              | 6  | 100.00 | 1.25E-05 | AT4G34460, AT1G53090, AT1G20090, AT2G26300, AT3G59220, AT1G48270                                                                                                                                                                                                                                                                                               | 6  | 1901 | 18171 | 9.558653 | 1.75E-04 | 1.75E-04 | 8.47E-03 |
| 4                  | GO:0008353~RNA polymerase II carboxy-terminal domain kinase activity    | 2  | 20.00  | 5.93E-03 | AT1G18040, AT1G66750                                                                                                                                                                                                                                                                                                                                           | 10 | 12   | 18171 | 302.85   | 1.23E-01 | 4.27E-02 | 4.55E+00 |
| 4                  | GO:0004693~cyclin-dependent protein serine/threonine kinase activity    | 3  | 30.00  | 1.86E-04 | AT1G18040, AT5G27620, AT1G66750                                                                                                                                                                                                                                                                                                                                | 10 | 42   | 18171 | 129.7929 | 4.08E-03 | 2.04E-03 | 1.45E-01 |
| 4                  | GO:0005515~protein binding                                              | 8  | 80.00  | 4.04E-06 | AT1G18040, AT1G03190, AT3G61600, AT5G27620, AT1G66750, AT4G14110, AT1G26830, AT4G30820                                                                                                                                                                                                                                                                         | 10 | 1901 | 18171 | 7.646923 | 8.88E-05 | 8.88E-05 | 3.16E-03 |
| 6                  | GO:0005525~GTP binding                                                  | 3  | 50.00  | 2.49E-03 | AT5G64300, AT5G59750, AT2G22450                                                                                                                                                                                                                                                                                                                                | 6  | 292  | 18171 | 31.11473 | 4.15E-02 | 2.10E-02 | 1.79E+00 |
| 6                  | GO:0008686~3,4-dihydroxy-2-butanone-4-phosphate synthase activity       | 3  | 50.00  | 3.63E-07 | AT5G64300, AT5G59750, AT2G22450                                                                                                                                                                                                                                                                                                                                | 6  | 4    | 18171 | 2271.375 | 6.18E-06 | 6.18E-06 | 2.63E-04 |
| 6                  | GO:0003935~GTP cyclohydrolase II activity                               | 3  | 50.00  | 3.63E-07 | AT5G64300, AT5G59750, AT2G22450                                                                                                                                                                                                                                                                                                                                | 6  | 4    | 18171 | 2271.375 | 6.18E-06 | 6.18E-06 | 2.63E-04 |

**Table S10.** Gene ontology terms associated with specific gene clusters in the osmotic stress associated gene network obtained using DAVID server. The description of the columns as in Table S7.

| Cluster                   | Term                                                                   | Count | %     | PValue   | Genes                                                                                                                                                                                                                                            | List Total | Pop Hits | Pop Total | Fold Enrichment | Bonferroni | Benjamini | FDR      |
|---------------------------|------------------------------------------------------------------------|-------|-------|----------|--------------------------------------------------------------------------------------------------------------------------------------------------------------------------------------------------------------------------------------------------|------------|----------|-----------|-----------------|------------|-----------|----------|
| <b>Biological Process</b> |                                                                        |       |       |          |                                                                                                                                                                                                                                                  |            |          |           |                 |            |           |          |
| 1                         | GO:0009631~cold acclimation                                            | 3     | 10.34 | 2.69E-03 | AT5G15960, AT1G20440, AT2G42540                                                                                                                                                                                                                  | 29         | 51       | 18499     | 37.52333        | 2.17E-01   | 1.62E-02  | 2.89E+00 |
| 1                         | GO:0010119~regulation of stomatal movement                             | 3     | 10.34 | 2.10E-03 | AT2G40220, AT4G26080, AT4G33950                                                                                                                                                                                                                  | 29         | 45       | 18499     | 42.52644        | 1.74E-01   | 1.36E-02  | 2.27E+00 |
| 1                         | GO:0009408~response to heat                                            | 4     | 13.79 | 1.77E-03 | AT5G57050, AT1G16540, AT5G67030, AT4G26080                                                                                                                                                                                                       | 29         | 160      | 18499     | 15.94741        | 1.49E-01   | 1.24E-02  | 1.92E+00 |
| 1                         | GO:0010118~stomatal movement                                           | 3     | 10.34 | 8.75E-04 | AT1G16540, AT4G33950, AT4G17615                                                                                                                                                                                                                  | 29         | 29       | 18499     | 65.9893         | 7.65E-02   | 7.21E-03  | 9.49E-01 |
| 1                         | GO:0010182~sugar mediated signaling pathway                            | 3     | 10.34 | 9.36E-04 | AT1G16540, AT2G40220, AT5G67030                                                                                                                                                                                                                  | 29         | 30       | 18499     | 63.78966        | 8.17E-02   | 7.08E-03  | 1.02E+00 |
| 1                         | GO:0009688~abscisic acid biosynthetic process                          | 3     | 10.34 | 2.29E-04 | AT1G16540, AT5G67030, AT3G14440                                                                                                                                                                                                                  | 29         | 15       | 18499     | 127.5793        | 2.06E-02   | 2.08E-03  | 2.50E-01 |
| 1                         | GO:0009409~response to cold                                            | 7     | 24.14 | 4.73E-06 | AT1G16540, AT5G52310, AT5G15960, AT1G20440, AT4G26080, AT4G17615, AT2G42540                                                                                                                                                                      | 29         | 299      | 18499     | 14.93403        | 4.31E-04   | 4.79E-05  | 5.16E-03 |
| 1                         | GO:0080163~regulation of protein serine/threonine phosphatase activity | 4     | 13.79 | 2.96E-06 | AT4G27920, AT4G17870, AT5G46790, AT2G26040                                                                                                                                                                                                       | 29         | 19       | 18499     | 134.294         | 2.69E-04   | 3.37E-05  | 3.23E-03 |
| 1                         | GO:0006468~protein phosphorylation                                     | 12    | 41.38 | 2.40E-08 | AT5G08590, AT5G57630, AT4G40010, AT2G23030, AT5G63650, AT4G33950, AT1G60940, AT3G50500, AT1G10940, AT3G17510, AT5G66880, AT1G78290                                                                                                               | 29         | 870      | 18499     | 8.798573        | 2.19E-06   | 3.13E-07  | 2.62E-05 |
| 1                         | GO:0009737~response to abscisic acid                                   | 11    | 37.93 | 1.60E-10 | AT5G57050, AT5G52310, AT5G15960, AT1G20440, AT4G26080, AT4G33950, AT3G50500, AT1G10940, AT3G17510, AT5G66880, AT2G42540                                                                                                                          | 29         | 394      | 18499     | 17.80929        | 1.45E-08   | 2.42E-09  | 1.74E-07 |
| 1                         | GO:0009651~response to salt stress                                     | 14    | 48.28 | 6.01E-14 | AT1G16540, AT5G08590, AT5G52310, AT4G40010, AT5G63650, AT4G33950, AT1G60940, AT3G50500, AT4G17615, AT1G10940, AT3G17510, AT5G66880, AT4G01420, AT2G42540                                                                                         | 29         | 484      | 18499     | 18.45155        | 5.47E-12   | 1.09E-12  | 6.55E-11 |
| 1                         | GO:0035556~intracellular signal transduction                           | 12    | 41.38 | 1.72E-15 | AT5G08590, AT5G57630, AT4G40010, AT2G23030, AT5G63650, AT4G33950, AT1G60940, AT3G50500, AT1G10940, AT3G17510, AT5G66880, AT1G78290                                                                                                               | 29         | 189      | 18499     | 40.50137        | 1.52E-13   | 7.57E-14  | 1.82E-12 |
| 1                         | GO:0009738~abscisic acid-activated signaling pathway                   | 12    | 41.38 | 2.43E-15 | AT4G27920, AT5G57050, AT4G17870, AT2G40220, AT1G72770, AT5G46790, AT4G26080, AT4G33950, AT3G50500, AT2G26040, AT4G17615, AT5G66880                                                                                                               | 29         | 195      | 18499     | 39.25517        | 2.22E-13   | 7.41E-14  | 2.66E-12 |
| 1                         | GO:0009414~response to water deprivation                               | 13    | 44.83 | 2.64E-15 | AT5G57050, AT5G52310, AT2G40220, AT5G15960, AT5G67030, AT1G20440, AT3G14440, AT4G33950, AT3G50500, AT4G17615, AT5G66880, AT4G01420, AT2G42540                                                                                                    | 29         | 279      | 18499     | 29.72278        | 2.42E-13   | 6.06E-14  | 2.91E-12 |
| 1                         | GO:0006970~response to osmotic stress                                  | 22    | 75.86 | 2.96E-41 | AT1G16540, AT5G08590, AT5G15960, AT1G20440, AT4G33950, AT1G60940, AT4G17615, AT1G10940, AT5G66880, AT4G01420, AT2G42540, AT5G57050, AT5G52310, AT4G40010, AT2G40220, AT5G67030, AT2G23030, AT5G63650, AT3G14440, AT3G50500, AT3G17510, AT1G78290 | 29         | 122      | 18499     | 115.0305        | 2.70E-39   | 2.70E-39  | 3.23E-38 |
| 2                         | GO:0007165~signal transduction                                         | 3     | 50.00 | 5.62E-03 | AT4G01370, AT3G45640, AT2G43790                                                                                                                                                                                                                  | 6          | 450      | 18499     | 20.55444        | 2.95E-01   | 3.81E-02  | 5.53E+00 |
| 2                         | GO:0010229~inflorescence development                                   | 2     | 33.33 | 4.86E-03 | AT3G45640, AT2G43790                                                                                                                                                                                                                             | 6          | 18       | 18499     | 342.5741        | 2.61E-01   | 3.70E-02  | 4.79E+00 |
| 2                         | GO:0010120~camalexin biosynthetic process                              | 2     | 33.33 | 2.70E-03 | AT3G45640, AT2G43790                                                                                                                                                                                                                             | 6          | 10       | 18499     | 616.6333        | 1.54E-01   | 2.37E-02  | 2.69E+00 |
| 2                         | GO:2000037~regulation of stomatal complex patterning                   | 2     | 33.33 | 1.62E-03 | AT3G45640, AT2G43790                                                                                                                                                                                                                             | 6          | 6        | 18499     | 1027.722        | 9.57E-02   | 1.66E-02  | 1.62E+00 |
| 2                         | GO:2000038~regulation of stomatal complex development                  | 2     | 33.33 | 1.62E-03 | AT3G45640, AT2G43790                                                                                                                                                                                                                             | 6          | 6        | 18499     | 1027.722        | 9.57E-02   | 1.66E-02  | 1.62E+00 |
| 2                         | GO:0009555~pollen development                                          | 3     | 50.00 | 1.06E-03 | AT4G01370, AT3G45640, AT2G43790                                                                                                                                                                                                                  | 6          | 193      | 18499     | 47.92487        | 6.37E-02   | 1.31E-02  | 1.07E+00 |
| 2                         | GO:0080136~priming of cellular response to stress                      | 2     | 33.33 | 5.41E-04 | AT3G45640, AT2G43790                                                                                                                                                                                                                             | 6          | 2        | 18499     | 3083.167        | 3.30E-02   | 8.35E-03  | 5.44E-01 |
| 2                         | GO:0009651~response to salt stress                                     | 4     | 66.67 | 1.71E-04 | AT3G08730, AT4G01370, AT2G43790, AT4G08500                                                                                                                                                                                                       | 6          | 484      | 18499     | 25.48072        | 1.06E-02   | 3.53E-03  | 1.73E-01 |
| 2                         | GO:0009409~response to cold                                            | 5     | 83.33 | 3.30E-07 | AT3G08730, AT4G01370, AT3G45640, AT2G43790, AT4G08500                                                                                                                                                                                            | 6          | 299      | 18499     | 51.55797        | 2.05E-05   | 1.02E-05  | 3.33E-04 |
| 2                         | GO:0006970~response to osmotic stress                                  | 5     | 83.33 | 8.96E-09 | AT3G08730, AT3G45640, AT1G43700, AT2G43790, AT4G08500                                                                                                                                                                                            | 6          | 122      | 18499     | 126.3593        | 5.55E-07   | 5.55E-07  | 9.04E-06 |
| <b>Cellular Component</b> |                                                                        |       |       |          |                                                                                                                                                                                                                                                  |            |          |           |                 |            |           |          |
| 1                         | GO:0005886~plasma membrane                                             | 10    | 34.48 | 1.22E-02 | AT4G27920, AT4G17870, AT5G46790, AT4G26080, AT1G60940, AT3G50500, AT2G26040, AT4G17615, AT3G17510, AT4G01420                                                                                                                                     | 28         | 3702     | 25147     | 2.426005        | 1.69E-01   | 3.62E-02  | 8.20E+00 |
| 1                         | GO:0008287~protein serine/threonine phosphatase complex                | 2     | 6.90  | 4.29E-03 | AT5G57050, AT4G26080                                                                                                                                                                                                                             | 28         | 4        | 25147     | 449.0536        | 6.24E-02   | 1.60E-02  | 2.94E+00 |
| 1                         | GO:0005829~cytosol                                                     | 9     | 31.03 | 2.25E-03 | AT5G57630, AT4G40010, AT2G23030, AT1G20440, AT4G33950, AT1G60940, AT3G50500, AT1G10940, AT5G66880                                                                                                                                                | 28         | 2309     | 25147     | 3.500634        | 3.32E-02   | 1.12E-02  | 1.56E+00 |



|                    |                                                     |    |        |          |                                                                                                                                                                                                                                                  |    |      |       |          |          |          |          |
|--------------------|-----------------------------------------------------|----|--------|----------|--------------------------------------------------------------------------------------------------------------------------------------------------------------------------------------------------------------------------------------------------|----|------|-------|----------|----------|----------|----------|
| 1                  | GO:0005634~nucleus                                  | 22 | 75.86  | 4.60E-05 | AT5G08590, AT1G20440, AT1G72770, AT4G33950, AT2G26040, AT1G60940, AT1G10940, AT4G01420, AT5G66880, AT4G27920, AT5G52310, AT4G17870, AT4G40010, AT5G57630, AT2G40220, AT2G23030, AT5G63650, AT5G46790, AT4G26080, AT3G50500, AT3G17510, AT1G78290 | 28 | 9796 | 25147 | 2.016982 | 6.90E-04 | 3.45E-04 | 3.20E-02 |
| 1                  | GO:0005737~cytoplasm                                | 20 | 68.97  | 2.15E-09 | AT1G16540, AT5G08590, AT1G72770, AT4G33950, AT2G26040, AT4G17615, AT4G01420, AT5G66880, AT4G27920, AT5G52310, AT4G17870, AT4G40010, AT5G57630, AT2G23030, AT5G63650, AT5G46790, AT4G26080, AT3G50500, AT3G17510, AT1G78290                       | 28 | 4407 | 25147 | 4.075821 | 3.23E-08 | 3.23E-08 | 1.50E-06 |
| Molecular Function |                                                     |    |        |          |                                                                                                                                                                                                                                                  |    |      |       |          |          |          |          |
| 1                  | GO:0070300~phosphatidic acid binding                | 2  | 6.90   | 1.23E-02 | AT1G60940, AT1G10940                                                                                                                                                                                                                             | 26 | 9    | 18171 | 155.3077 | 3.52E-01 | 4.25E-02 | 1.04E+01 |
| 1                  | GO:0042803~protein homodimerization activity        | 4  | 13.79  | 1.84E-03 | AT4G27920, AT4G17870, AT5G46790, AT2G26040                                                                                                                                                                                                       | 26 | 179  | 18171 | 15.61753 | 6.25E-02 | 7.15E-03 | 1.62E+00 |
| 1                  | GO:0004672~protein kinase activity                  | 6  | 20.69  | 4.40E-04 | AT5G08590, AT4G33950, AT1G60940, AT3G50500, AT1G10940, AT5G66880                                                                                                                                                                                 | 26 | 482  | 18171 | 8.699808 | 1.53E-02 | 1.93E-03 | 3.89E-01 |
| 1                  | GO:0005524~ATP binding                              | 12 | 41.38  | 1.40E-04 | AT5G08590, AT5G57630, AT4G40010, AT2G23030, AT5G63650, AT4G33950, AT1G60940, AT3G50500, AT1G10940, AT3G17510, AT5G66880, AT1G78290                                                                                                               | 26 | 2372 | 18171 | 3.535673 | 4.90E-03 | 7.01E-04 | 1.24E-01 |
| 1                  | GO:0004872~receptor activity                        | 4  | 13.79  | 2.20E-05 | AT4G27920, AT4G17870, AT5G46790, AT2G26040                                                                                                                                                                                                       | 26 | 40   | 18171 | 69.88846 | 7.69E-04 | 1.28E-04 | 1.95E-02 |
| 1                  | GO:0010427~abscisic acid binding                    | 4  | 13.79  | 2.20E-06 | AT4G27920, AT4G17870, AT5G46790, AT2G26040                                                                                                                                                                                                       | 26 | 19   | 18171 | 147.1336 | 7.69E-05 | 1.92E-05 | 1.95E-03 |
| 1                  | GO:0005515~protein binding                          | 13 | 44.83  | 2.34E-06 | AT4G27920, AT5G57050, AT4G17870, AT5G57630, AT2G40220, AT1G72770, AT5G46790, AT4G26080, AT4G33950, AT3G50500, AT2G26040, AT3G17510, AT5G66880                                                                                                    | 26 | 1901 | 18171 | 4.779327 | 8.20E-05 | 1.64E-05 | 2.08E-03 |
| 1                  | GO:0004864~protein phosphatase inhibitor activity   | 4  | 13.79  | 1.27E-06 | AT4G27920, AT4G17870, AT5G46790, AT2G26040                                                                                                                                                                                                       | 26 | 16   | 18171 | 174.7212 | 4.46E-05 | 1.49E-05 | 1.13E-03 |
| 1                  | GO:0016301~kinase activity                          | 12 | 41.38  | 4.30E-08 | AT5G08590, AT5G57630, AT4G40010, AT2G23030, AT5G63650, AT4G33950, AT1G60940, AT3G50500, AT1G10940, AT3G17510, AT5G66880, AT1G78290                                                                                                               | 26 | 1039 | 18171 | 8.071815 | 1.51E-06 | 7.53E-07 | 3.81E-05 |
| 1                  | GO:0004674~protein serine/threonine kinase activity | 12 | 41.38  | 3.00E-09 | AT5G08590, AT5G57630, AT4G40010, AT2G23030, AT5G63650, AT4G33950, AT1G60940, AT3G50500, AT1G10940, AT3G17510, AT5G66880, AT1G78290                                                                                                               | 26 | 804  | 18171 | 10.43111 | 1.05E-07 | 1.05E-07 | 2.66E-06 |
| 2                  | GO:0005524~ATP binding                              | 5  | 83.33  | 1.30E-03 | AT3G08730, AT4G01370, AT3G45640, AT2G43790, AT4G08500                                                                                                                                                                                            | 6  | 2372 | 18171 | 6.383853 | 1.80E-02 | 3.63E-03 | 8.78E-01 |
| 2                  | GO:0004672~protein kinase activity                  | 4  | 66.67  | 1.78E-04 | AT3G08730, AT4G01370, AT3G45640, AT2G43790                                                                                                                                                                                                       | 6  | 482  | 18171 | 25.13278 | 2.49E-03 | 6.24E-04 | 1.21E-01 |
| 2                  | GO:0016301~kinase activity                          | 5  | 83.33  | 5.07E-05 | AT3G08730, AT4G01370, AT3G45640, AT2G43790, AT4G08500                                                                                                                                                                                            | 6  | 1039 | 18171 | 14.57411 | 7.10E-04 | 2.37E-04 | 3.45E-02 |
| 2                  | GO:0005515~protein binding                          | 6  | 100.00 | 1.25E-05 | AT3G08730, AT4G01370, AT3G45640, AT1G43700, AT2G43790, AT4G08500                                                                                                                                                                                 | 6  | 1901 | 18171 | 9.558653 | 1.75E-04 | 1.75E-04 | 8.47E-03 |
| 2                  | GO:0004707~MAP kinase activity                      | 3  | 50.00  | 1.53E-05 | AT4G01370, AT3G45640, AT2G43790                                                                                                                                                                                                                  | 6  | 23   | 18171 | 395.0217 | 2.14E-04 | 1.07E-04 | 1.04E-02 |

**Table S11.** Gene ontology terms associated with specific gene clusters in the oxidative stress associated gene network obtained using DAVID server. The description of the columns as in Table S7.

| Cluster                   | Term                                                            | Count | %      | PValue   | Genes                                                                                                        | List Total | Pop Hits | Pop Total | Fold Enrichment | Bonferroni | Benjamini | FDR      |
|---------------------------|-----------------------------------------------------------------|-------|--------|----------|--------------------------------------------------------------------------------------------------------------|------------|----------|-----------|-----------------|------------|-----------|----------|
| <b>Biological Process</b> |                                                                 |       |        |          |                                                                                                              |            |          |           |                 |            |           |          |
| 1                         | GO:0009611~response to wounding                                 | 5     | 41.67  | 2.59E-06 | AT5G59820, AT3G45640, AT1G27730, AT1G19180, AT1G32640                                                        | 11         | 199      | 18499     | 42.25445        | 1.74E-04   | 5.79E-05  | 2.66E-03 |
| 1                         | GO:0010200~response to chitin                                   | 5     | 41.67  | 5.19E-07 | AT3G46090, AT5G59820, AT3G45640, AT1G27730, AT1G32640                                                        | 11         | 133      | 18499     | 63.22283        | 3.47E-05   | 1.74E-05  | 5.32E-04 |
| 1                         | GO:0006979~response to oxidative stress                         | 9     | 75.00  | 1.49E-13 | AT3G46090, AT2G40000, AT5G59820, AT3G45640, AT1G27730, AT3G22380, AT1G09970, AT3G06110, AT1G19020            | 11         | 291      | 18499     | 52.01218        | 1.00E-11   | 1.00E-11  | 1.53E-10 |
| 2                         | GO:0006379~mRNA cleavage                                        | 2     | 33.33  | 2.70E-03 | AT5G23880, AT5G51660                                                                                         | 6          | 10       | 18499     | 616.6333        | 4.49E-02   | 2.27E-02  | 1.94E+00 |
| 2                         | GO:0006378~mRNA polyadenylation                                 | 3     | 50.00  | 1.11E-05 | AT5G23880, AT1G30460, AT5G51660                                                                              | 6          | 20       | 18499     | 462.475         | 1.88E-04   | 1.88E-04  | 8.02E-03 |
| 3                         | GO:000302~response to reactive oxygen species                   | 2     | 20.00  | 1.59E-02 | AT4G35000, AT3G09640                                                                                         | 10         | 33       | 18499     | 112.1152        | 4.57E-01   | 3.99E-02  | 1.35E+01 |
| 3                         | GO:0010193~response to ozone                                    | 2     | 20.00  | 1.59E-02 | AT4G25100, AT1G08830                                                                                         | 10         | 33       | 18499     | 112.1152        | 4.57E-01   | 3.99E-02  | 1.35E+01 |
| 3                         | GO:0010039~response to iron ion                                 | 2     | 20.00  | 8.73E-03 | AT2G28190, AT1G08830                                                                                         | 10         | 18       | 18499     | 205.5444        | 2.83E-01   | 2.35E-02  | 7.61E+00 |
| 3                         | GO:0071486~cellular response to high light intensity            | 2     | 20.00  | 3.89E-03 | AT5G18100, AT2G28190                                                                                         | 10         | 8        | 18499     | 462.475         | 1.38E-01   | 1.13E-02  | 3.46E+00 |
| 3                         | GO:0071329~cellular response to sucrose stimulus                | 2     | 20.00  | 3.40E-03 | AT2G28190, AT1G08830                                                                                         | 10         | 7        | 18499     | 528.5429        | 1.21E-01   | 1.07E-02  | 3.03E+00 |
| 3                         | GO:0006801~superoxide metabolic process                         | 2     | 20.00  | 9.73E-04 | AT2G28190, AT1G08830                                                                                         | 10         | 2        | 18499     | 1849.9          | 3.63E-02   | 3.36E-03  | 8.76E-01 |
| 3                         | GO:0042744~hydrogen peroxide catabolic process                  | 3     | 30.00  | 8.06E-04 | AT4G35090, AT4G35000, AT3G09640                                                                              | 10         | 89       | 18499     | 62.35618        | 3.02E-02   | 3.06E-03  | 7.26E-01 |
| 3                         | GO:0071472~cellular response to salt stress                     | 3     | 30.00  | 1.10E-04 | AT5G18100, AT2G28190, AT1G08830                                                                              | 10         | 33       | 18499     | 168.1727        | 4.18E-03   | 4.65E-04  | 9.96E-02 |
| 3                         | GO:0046688~response to copper ion                               | 3     | 30.00  | 4.40E-05 | AT4G25100, AT2G28190, AT1G08830                                                                              | 10         | 21       | 18499     | 264.2714        | 1.67E-03   | 2.09E-04  | 3.97E-02 |
| 3                         | GO:0071493~cellular response to UV-B                            | 3     | 30.00  | 4.41E-06 | AT5G18100, AT2G28190, AT1G08830                                                                              | 10         | 7        | 18499     | 792.8143        | 1.68E-04   | 2.40E-05  | 3.99E-03 |
| 3                         | GO:0034599~cellular response to oxidative stress                | 4     | 40.00  | 3.27E-06 | AT4G35000, AT3G09640, AT2G28190, AT1G08830                                                                   | 10         | 64       | 18499     | 115.6188        | 1.24E-04   | 2.07E-05  | 2.95E-03 |
| 3                         | GO:0071484~cellular response to light intensity                 | 3     | 30.00  | 2.10E-06 | AT5G18100, AT2G28190, AT1G08830                                                                              | 10         | 5        | 18499     | 1109.94         | 7.99E-05   | 1.60E-05  | 1.90E-03 |
| 3                         | GO:0071457~cellular response to ozone                           | 3     | 30.00  | 6.31E-07 | AT5G18100, AT2G28190, AT1G08830                                                                              | 10         | 3        | 18499     | 1849.9          | 2.40E-05   | 6.00E-06  | 5.70E-04 |
| 3                         | GO:0055114~oxidation-reduction process                          | 8     | 80.00  | 3.10E-07 | AT4G35090, AT1G63460, AT4G25100, AT4G35000, AT5G18100, AT3G09640, AT2G28190, AT1G08830                       | 10         | 1330     | 18499     | 11.12722        | 1.18E-05   | 3.92E-06  | 2.80E-04 |
| 3                         | GO:0019430~removal of superoxide radicals                       | 4     | 40.00  | 1.75E-08 | AT4G25100, AT5G18100, AT2G28190, AT1G08830                                                                   | 10         | 12       | 18499     | 616.6333        | 6.64E-07   | 3.32E-07  | 1.58E-05 |
| 3                         | GO:0006979~response to oxidative stress                         | 10    | 100.00 | 5.22E-17 | AT4G35090, AT1G63460, AT4G39640, AT4G25100, AT4G35000, AT5G18100, AT3G09640, AT1G02930, AT2G28190, AT1G08830 | 10         | 291      | 18499     | 63.57045        | 1.98E-15   | 1.98E-15  | 4.71E-14 |
| 4                         | GO:0043086~negative regulation of catalytic activity            | 2     | 25.00  | 2.36E-02 | AT1G03680, AT3G15360                                                                                         | 8          | 63       | 18499     | 73.40873        | 4.23E-01   | 4.47E-02  | 1.72E+01 |
| 4                         | GO:0006464~cellular protein modification process                | 2     | 25.00  | 1.50E-02 | AT5G07460, AT4G25130                                                                                         | 8          | 40       | 18499     | 115.6188        | 2.94E-01   | 3.12E-02  | 1.13E+01 |
| 4                         | GO:0006109~regulation of carbohydrate metabolic process         | 2     | 25.00  | 2.27E-03 | AT1G03680, AT3G15360                                                                                         | 8          | 6        | 18499     | 770.7917        | 5.09E-02   | 5.21E-03  | 1.78E+00 |
| 4                         | GO:0006457~protein folding                                      | 4     | 50.00  | 1.25E-04 | AT1G76080, AT4G03520, AT1G03680, AT3G15360                                                                   | 8          | 288      | 18499     | 32.11632        | 2.87E-03   | 3.19E-04  | 9.89E-02 |
| 4                         | GO:0043085~positive regulation of catalytic activity            | 3     | 37.50  | 1.29E-05 | AT4G03520, AT1G03680, AT3G15360                                                                              | 8          | 15       | 18499     | 462.475         | 2.96E-04   | 4.22E-05  | 1.02E-02 |
| 4                         | GO:0030091~protein repair                                       | 3     | 37.50  | 1.47E-05 | AT5G07460, AT4G04800, AT4G25130                                                                              | 8          | 16       | 18499     | 433.5703        | 3.38E-04   | 4.22E-05  | 1.16E-02 |
| 4                         | GO:0000103~sulfate assimilation                                 | 4     | 50.00  | 6.86E-07 | AT1G76080, AT4G03520, AT1G03680, AT3G15360                                                                   | 8          | 51       | 18499     | 181.3627        | 1.58E-05   | 2.63E-06  | 5.43E-04 |
| 4                         | GO:0006662~glycerol ether metabolic process                     | 4     | 50.00  | 2.78E-07 | AT1G76080, AT4G03520, AT1G03680, AT3G15360                                                                   | 8          | 38       | 18499     | 243.4079        | 6.40E-06   | 1.28E-06  | 2.21E-04 |
| 4                         | GO:0045454~cell redox homeostasis                               | 5     | 62.50  | 1.63E-07 | AT1G76080, AT3G06050, AT4G03520, AT1G03680, AT3G15360                                                        | 8          | 155      | 18499     | 74.59274        | 3.74E-06   | 9.36E-07  | 1.29E-04 |
| 4                         | GO:0006979~response to oxidative stress                         | 6     | 75.00  | 1.91E-08 | AT1G76080, AT5G07460, AT3G06050, AT4G03520, AT1G03680, AT3G15360                                             | 8          | 291      | 18499     | 47.67784        | 4.38E-07   | 1.46E-07  | 1.51E-05 |
| 4                         | GO:0055114~oxidation-reduction process                          | 8     | 100.00 | 9.78E-09 | AT1G76080, AT5G07460, AT3G06050, AT4G04800, AT4G25130, AT4G03520, AT1G03680, AT3G15360                       | 8          | 1330     | 18499     | 13.90902        | 2.25E-07   | 1.13E-07  | 7.76E-06 |
| 4                         | GO:0034599~cellular response to oxidative stress                | 7     | 87.50  | 9.41E-15 | AT1G76080, AT5G07460, AT4G04800, AT4G25130, AT4G03520, AT1G03680, AT3G15360                                  | 8          | 64       | 18499     | 252.916         | 2.17E-13   | 2.17E-13  | 7.48E-12 |
| 5                         | GO:0006120~mitochondrial electron transport, NADH to ubiquinone | 2     | 15.38  | 6.47E-03 | AT5G08530, AT4G02580                                                                                         | 13         | 10       | 18499     | 284.6           | 1.66E-01   | 4.44E-02  | 5.28E+00 |
| 5                         | GO:0006097~glyoxylate cycle                                     | 2     | 15.38  | 6.47E-03 | AT2G05710, AT4G26970                                                                                         | 13         | 10       | 18499     | 284.6           | 1.66E-01   | 4.44E-02  | 5.28E+00 |
| 5                         | GO:0006102~isocitrate metabolic process                         | 2     | 15.38  | 7.11E-03 | AT2G05710, AT4G26970                                                                                         | 13         | 11       | 18499     | 258.7273        | 1.81E-01   | 3.92E-02  | 5.80E+00 |
| 5                         | GO:0006101~citrate metabolic process                            | 2     | 15.38  | 3.24E-03 | AT2G05710, AT4G26970                                                                                         | 13         | 5        | 18499     | 569.2           | 8.68E-02   | 2.98E-02  | 2.68E+00 |
| 5                         | GO:0006099~tricarboxylic acid cycle                             | 4     | 30.77  | 4.80E-06 | AT2G05710, AT2G47510, AT5G55070, AT4G26970                                                                   | 13         | 53       | 18499     | 107.3962        | 1.34E-04   | 6.72E-05  | 4.01E-03 |

|                    |                                                                                               |    |        |          |                                                                                                                         |    |      |       |          |          |          |          |
|--------------------|-----------------------------------------------------------------------------------------------|----|--------|----------|-------------------------------------------------------------------------------------------------------------------------|----|------|-------|----------|----------|----------|----------|
| 5                  | GO:0006979~response to oxidative stress                                                       | 9  | 69.23  | 1.60E-12 | AT5G08670, AT4G02580, AT1G32220, AT2G05710, AT2G47510, AT5G37510, AT5G20140, AT5G55070, AT4G26970                       | 13 | 291  | 18499 | 44.01031 | 4.47E-11 | 4.47E-11 | 1.34E-09 |
| 6                  | GO:0006979~response to oxidative stress                                                       | 5  | 100.00 | 6.00E-08 | AT2G22080, AT2G44240, AT1G50290, AT1G64360, AT2G19310                                                                   | 5  | 291  | 18499 | 63.57045 | 3.60E-07 | 3.60E-07 | 2.87E-05 |
| Cellular Component |                                                                                               |    |        |          |                                                                                                                         |    |      |       |          |          |          |          |
| 2                  | GO:0005847~mRNA cleavage and polyadenylation specificity factor complex                       | 2  | 33.33  | 1.27E-03 | AT5G23880, AT1G30460                                                                                                    | 5  | 8    | 25147 | 1257.35  | 8.87E-03 | 8.87E-03 | 6.54E-01 |
| 3                  | GO:0009514~glyoxysome                                                                         | 2  | 20.00  | 5.00E-03 | AT4G35090, AT4G35000                                                                                                    | 10 | 14   | 25147 | 359.2429 | 1.22E-01 | 4.25E-02 | 4.03E+00 |
| 3                  | GO:0009507~chloroplast                                                                        | 6  | 60.00  | 6.19E-03 | AT4G35090, AT4G25100, AT4G35000, AT5G18100, AT3G09640, AT2G28190                                                        | 10 | 3855 | 25147 | 3.91393  | 1.49E-01 | 3.95E-02 | 4.96E+00 |
| 3                  | GO:0005777~peroxisome                                                                         | 3  | 30.00  | 2.78E-03 | AT4G35090, AT4G35000, AT5G18100                                                                                         | 10 | 226  | 25147 | 33.38097 | 6.97E-02 | 3.55E-02 | 2.25E+00 |
| 3                  | GO:0005829~cytosol                                                                            | 7  | 70.00  | 3.92E-05 | AT4G35090, AT1G63460, AT4G25100, AT4G35000, AT3G09640, AT1G02930, AT1G08830                                             | 10 | 2309 | 25147 | 7.623603 | 1.02E-03 | 1.02E-03 | 3.21E-02 |
| 4                  | GO:0009507~chloroplast                                                                        | 6  | 75.00  | 1.35E-03 | AT1G76080, AT5G07460, AT4G25130, AT4G03520, AT1G03680, AT3G15360                                                        | 8  | 3855 | 25147 | 4.892412 | 2.01E-02 | 5.06E-03 | 9.35E-01 |
| 4                  | GO:0009579~thylakoid                                                                          | 3  | 37.50  | 1.36E-03 | AT4G03520, AT1G03680, AT3G15360                                                                                         | 8  | 206  | 25147 | 45.77731 | 2.03E-02 | 4.09E-03 | 9.45E-01 |
| 4                  | GO:0009941~chloroplast envelope                                                               | 4  | 50.00  | 3.28E-04 | AT1G76080, AT4G25130, AT1G03680, AT3G15360                                                                              | 8  | 543  | 25147 | 23.15562 | 4.92E-03 | 1.64E-03 | 2.28E-01 |
| 4                  | GO:0009570~chloroplast stroma                                                                 | 5  | 62.50  | 1.48E-05 | AT1G76080, AT4G25130, AT4G03520, AT1G03680, AT3G15360                                                                   | 8  | 653  | 25147 | 24.06872 | 2.22E-04 | 1.11E-04 | 1.03E-02 |
| 4                  | GO:0005623~cell                                                                               | 5  | 62.50  | 1.13E-07 | AT1G76080, AT3G06050, AT4G03520, AT1G03680, AT3G15360                                                                   | 8  | 192  | 25147 | 81.85872 | 1.70E-06 | 1.70E-06 | 7.87E-05 |
| 5                  | GO:0009507~chloroplast                                                                        | 7  | 53.85  | 5.18E-03 | AT5G08670, AT5G64940, AT1G32220, AT2G05710, AT5G37510, AT5G20140, AT4G26970                                             | 13 | 3855 | 25147 | 3.512501 | 1.17E-01 | 4.07E-02 | 4.08E+00 |
| 5                  | GO:0005739~mitochondrion                                                                      | 11 | 84.62  | 1.04E-07 | AT5G08670, AT5G08530, AT4G02580, AT1G32220, AT1G79010, AT1G16700, AT2G05710, AT2G47510, AT5G37510, AT5G55070, AT4G26970 | 13 | 3406 | 25147 | 6.247279 | 2.50E-06 | 1.25E-06 | 8.37E-05 |
| 5                  | GO:0005747~mitochondrial respiratory chain complex I                                          | 6  | 46.15  | 4.67E-11 | AT5G08670, AT5G08530, AT4G02580, AT1G79010, AT1G16700, AT5G37510                                                        | 13 | 59   | 25147 | 196.7171 | 1.12E-09 | 1.12E-09 | 3.75E-08 |
| Molecular Function |                                                                                               |    |        |          |                                                                                                                         |    |      |       |          |          |          |          |
| 1                  | GO:0043565~sequence-specific DNA binding                                                      | 4  | 33.33  | 1.60E-03 | AT3G46090, AT5G59820, AT1G27730, AT1G32640                                                                              | 8  | 676  | 18171 | 13.44009 | 2.85E-02 | 2.85E-02 | 1.18E+00 |
| 3                  | GO:0020037~heme binding                                                                       | 3  | 30.00  | 1.47E-02 | AT4G35090, AT4G35000, AT3G09640                                                                                         | 10 | 386  | 18171 | 14.12254 | 2.34E-01 | 4.34E-02 | 1.03E+01 |
| 3                  | GO:0004130~cytochrome-c peroxidase activity                                                   | 2  | 20.00  | 3.96E-03 | AT4G35000, AT3G09640                                                                                                    | 10 | 8    | 18171 | 454.275  | 6.89E-02 | 1.77E-02 | 2.88E+00 |
| 3                  | GO:0016688~L-ascorbate peroxidase activity                                                    | 2  | 20.00  | 4.45E-03 | AT4G35000, AT3G09640                                                                                                    | 10 | 9    | 18171 | 403.8    | 7.71E-02 | 1.59E-02 | 3.23E+00 |
| 3                  | GO:0046872~metal ion binding                                                                  | 6  | 60.00  | 4.99E-04 | AT4G35090, AT4G25100, AT4G35000, AT3G09640, AT2G28190, AT1G08830                                                        | 10 | 1606 | 18171 | 6.788667 | 8.94E-03 | 2.99E-03 | 3.67E-01 |
| 3                  | GO:0005507~copper ion binding                                                                 | 5  | 50.00  | 3.61E-06 | AT4G25100, AT5G18100, AT1G02930, AT2G28190, AT1G08830                                                                   | 10 | 241  | 18171 | 37.69917 | 6.50E-05 | 3.25E-05 | 2.66E-03 |
| 3                  | GO:0004784~superoxide dismutase activity                                                      | 4  | 40.00  | 4.70E-09 | AT4G25100, AT5G18100, AT2G28190, AT1G08830                                                                              | 10 | 8    | 18171 | 908.55   | 8.46E-08 | 8.46E-08 | 3.46E-06 |
| 4                  | GO:0008047~enzyme activator activity                                                          | 3  | 37.50  | 1.73E-05 | AT4G03520, AT1G03680, AT3G15360                                                                                         | 8  | 17   | 18171 | 400.8309 | 2.59E-04 | 4.31E-05 | 1.20E-02 |
| 4                  | GO:0015035~protein disulfide oxidoreductase activity                                          | 4  | 50.00  | 4.19E-06 | AT1G76080, AT4G03520, AT1G03680, AT3G15360                                                                              | 8  | 91   | 18171 | 99.84066 | 6.29E-05 | 1.57E-05 | 2.91E-03 |
| 4                  | GO:0008113~peptide-methionine (S)-S-oxide reductase activity                                  | 3  | 37.50  | 4.57E-06 | AT5G07460, AT4G04800, AT4G25130                                                                                         | 8  | 9    | 18171 | 757.125  | 6.86E-05 | 1.37E-05 | 3.18E-03 |
| 4                  | GO:0016671~oxidoreductase activity, acting on a sulfur group of donors, disulfide as acceptor | 4  | 50.00  | 4.61E-07 | AT1G76080, AT4G03520, AT1G03680, AT3G15360                                                                              | 8  | 44   | 18171 | 206.4886 | 6.91E-06 | 3.45E-06 | 3.20E-04 |
| 4                  | GO:0004791~thioredoxin-disulfide reductase activity                                           | 4  | 50.00  | 6.40E-07 | AT1G76080, AT4G03520, AT1G03680, AT3G15360                                                                              | 8  | 49   | 18171 | 185.4184 | 9.60E-06 | 3.20E-06 | 4.45E-04 |
| 4                  | GO:0047134~protein-disulfide reductase activity                                               | 4  | 50.00  | 1.27E-07 | AT1G76080, AT4G03520, AT1G03680, AT3G15360                                                                              | 8  | 29   | 18171 | 313.2931 | 1.91E-06 | 1.91E-06 | 8.86E-05 |
| 5                  | GO:0005507~copper ion binding                                                                 | 3  | 23.08  | 1.06E-02 | AT5G08670, AT2G05710, AT4G26970                                                                                         | 13 | 241  | 18171 | 17.39962 | 2.00E-01 | 4.37E-02 | 7.89E+00 |
| 5                  | GO:0003994~aconitate hydratase activity                                                       | 2  | 15.38  | 1.98E-03 | AT2G05710, AT4G26970                                                                                                    | 13 | 3    | 18171 | 931.8462 | 4.08E-02 | 1.04E-02 | 1.52E+00 |
| 5                  | GO:0003954~NADH dehydrogenase activity                                                        | 3  | 23.08  | 3.11E-05 | AT5G08530, AT1G32220, AT5G37510                                                                                         | 13 | 13   | 18171 | 322.5621 | 6.52E-04 | 2.17E-04 | 2.40E-02 |
| 5                  | GO:0008137~NADH dehydrogenase (ubiquinone) activity                                           | 5  | 38.46  | 7.12E-09 | AT5G08530, AT4G02580, AT1G79010, AT1G16700, AT5G37510                                                                   | 13 | 37   | 18171 | 188.8877 | 1.49E-07 | 7.47E-08 | 5.49E-06 |
| 5                  | GO:0051539~4 iron, 4 sulfur cluster binding                                                   | 6  | 46.15  | 3.59E-10 | AT5G08530, AT1G79010, AT1G16700, AT2G05710, AT5G37510, AT4G26970                                                        | 13 | 64   | 18171 | 131.0409 | 7.54E-09 | 7.54E-09 | 2.77E-07 |

**Table S12.** Gene ontology terms associated with specific gene clusters in the salt stress associated gene network obtained using DAVID server. The description of the columns as in Table S7.

| Cluster                   | Term                                                                        | Count | %     | PValue   | Genes                                                                                                                                                                                                                                                                                                   | List Total | Pop Hits | Pop Total | Fold Enrichment | Bonferroni | Benjamini | FDR      |
|---------------------------|-----------------------------------------------------------------------------|-------|-------|----------|---------------------------------------------------------------------------------------------------------------------------------------------------------------------------------------------------------------------------------------------------------------------------------------------------------|------------|----------|-----------|-----------------|------------|-----------|----------|
| <b>Biological Process</b> |                                                                             |       |       |          |                                                                                                                                                                                                                                                                                                         |            |          |           |                 |            |           |          |
| 1                         | GO:0010119~regulation of stomatal movement                                  | 3     | 8.82  | 2.91E-03 | AT4G23650, AT4G26080, AT4G33950                                                                                                                                                                                                                                                                         | 34         | 45       | 18499     | 36.273          | 2.51E-01   | 1.91E-02  | 3.18E+00 |
| 1                         | GO:0009789~positive regulation of abscisic acid-activated signaling pathway | 3     | 8.82  | 1.67E-03 | AT3G50500, AT5G66880, AT3G17980                                                                                                                                                                                                                                                                         | 34         | 34       | 18499     | 48.008          | 1.53E-01   | 1.18E-02  | 1.84E+00 |
| 1                         | GO:0006814~sodium ion transport                                             | 3     | 8.82  | 1.39E-03 | AT5G27150, AT2G01980, AT4G10310                                                                                                                                                                                                                                                                         | 34         | 31       | 18499     | 52.654          | 1.29E-01   | 1.05E-02  | 1.53E+00 |
| 1                         | GO:0051453~regulation of intracellular pH                                   | 3     | 8.82  | 1.13E-03 | AT5G27150, AT2G01980, AT3G47950                                                                                                                                                                                                                                                                         | 34         | 28       | 18499     | 58.295          | 1.06E-01   | 1.02E-02  | 1.25E+00 |
| 1                         | GO:0010118~stomatal movement                                                | 3     | 8.82  | 1.22E-03 | AT1G16540, AT4G33950, AT4G17615                                                                                                                                                                                                                                                                         | 34         | 29       | 18499     | 56.285          | 1.13E-01   | 9.99E-03  | 1.34E+00 |
| 1                         | GO:0006470~protein dephosphorylation                                        | 4     | 11.76 | 8.10E-04 | AT5G57050, AT2G33700, AT1G72770, AT4G26080                                                                                                                                                                                                                                                              | 34         | 103      | 18499     | 21.130          | 7.71E-02   | 7.99E-03  | 8.94E-01 |
| 1                         | GO:2000377~regulation of reactive oxygen species metabolic process          | 3     | 8.82  | 6.34E-04 | AT2G01980, AT4G33950, AT1G32230                                                                                                                                                                                                                                                                         | 34         | 21       | 18499     | 77.727          | 6.09E-02   | 6.96E-03  | 7.01E-01 |
| 1                         | GO:0080163~regulation of protein serine/threonine phosphatase activity      | 3     | 8.82  | 5.18E-04 | AT4G17870, AT5G46790, AT2G26040                                                                                                                                                                                                                                                                         | 34         | 19       | 18499     | 85.909          | 5.00E-02   | 6.39E-03  | 5.72E-01 |
| 1                         | GO:0009737~response to abscisic acid                                        | 10    | 29.41 | 2.02E-08 | AT5G57050, AT3G61890, AT3G46930, AT2G33700, AT4G26080, AT4G33950, AT3G50500, AT1G10940, AT3G17510, AT5G66880                                                                                                                                                                                            | 34         | 394      | 18499     | 13.809          | 2.00E-06   | 2.86E-07  | 2.24E-05 |
| 1                         | GO:0006468~protein phosphorylation                                          | 14    | 41.18 | 1.20E-09 | AT5G08590, AT5G35410, AT4G33950, AT1G60940, AT5G26751, AT1G10940, AT5G66880, AT3G46930, AT4G23650, AT4G40010, AT5G57630, AT5G63650, AT3G50500, AT3G17510                                                                                                                                                | 34         | 870      | 18499     | 8.755           | 1.19E-07   | 1.99E-08  | 1.33E-06 |
| 1                         | GO:0009414~response to water deprivation                                    | 12    | 35.29 | 1.09E-12 | AT5G57050, AT2G26650, AT3G61890, AT3G46930, AT2G33700, AT1G15690, AT4G33950, AT3G50500, AT4G17615, AT4G01420, AT5G66880, AT1G32230                                                                                                                                                                      | 34         | 279      | 18499     | 23.402          | 1.08E-10   | 2.15E-11  | 1.21E-09 |
| 1                         | GO:0009738~abscisic acid-activated signaling pathway                        | 12    | 35.29 | 2.13E-14 | AT5G57050, AT4G17870, AT4G23650, AT1G72770, AT5G46790, AT4G26080, AT4G33950, AT3G50500, AT2G26040, AT4G17615, AT5G66880, AT3G17980                                                                                                                                                                      | 34         | 195      | 18499     | 33.482          | 2.11E-12   | 5.28E-13  | 2.36E-11 |
| 1                         | GO:0035556~intracellular signal transduction                                | 12    | 35.29 | 1.50E-14 | AT5G08590, AT5G57630, AT4G40010, AT4G23650, AT5G63650, AT5G35410, AT4G33950, AT1G60940, AT3G50500, AT1G10940, AT3G17510, AT5G66880                                                                                                                                                                      | 34         | 189      | 18499     | 34.545          | 1.48E-12   | 4.95E-13  | 1.66E-11 |
| 1                         | GO:0006970~response to osmotic stress                                       | 17    | 50.00 | 4.88E-27 | AT1G16540, AT5G08590, AT4G33950, AT4G10310, AT1G60940, AT4G17615, AT1G10940, AT5G66880, AT4G01420, AT1G32230, AT5G57050, AT3G46930, AT3G61890, AT4G40010, AT5G63650, AT3G50500, AT3G17510                                                                                                               | 34         | 122      | 18499     | 75.816          | 4.83E-25   | 2.41E-25  | 5.40E-24 |
| 1                         | GO:0009651~response to salt stress                                          | 27    | 79.41 | 1.33E-35 | AT4G10310, AT1G60940, AT5G66880, AT1G32230, AT3G47950, AT2G26650, AT3G46930, AT3G61890, AT2G33700, AT5G63650, AT3G50500, AT3G17510, AT3G17980, AT1G16540, AT5G08590, AT1G06040, AT5G35410, AT4G33950, AT5G26751, AT1G10940, AT4G17615, AT4G01420, AT4G23650, AT4G40010, AT5G27150, AT2G01980, AT1G15690 | 34         | 484      | 18499     | 30.352          | 1.32E-33   | 1.32E-33  | 1.48E-32 |
| 2                         | GO:0070370~cellular heat acclimation                                        | 2     | 14.29 | 5.93E-03 | AT2G30250, AT2G38470                                                                                                                                                                                                                                                                                    | 12         | 10       | 18499     | 308.317         | 3.64E-01   | 4.90E-02  | 6.07E+00 |
| 2                         | GO:0010337~regulation of salicylic acid metabolic process                   | 2     | 14.29 | 4.75E-03 | AT1G28380, AT2G41010                                                                                                                                                                                                                                                                                    | 12         | 8        | 18499     | 385.396         | 3.04E-01   | 4.42E-02  | 4.88E+00 |
| 2                         | GO:0010200~response to chitin                                               | 3     | 21.43 | 2.70E-03 | AT3G23250, AT1G27730, AT2G38470                                                                                                                                                                                                                                                                         | 12         | 133      | 18499     | 34.773          | 1.86E-01   | 2.90E-02  | 2.81E+00 |
| 2                         | GO:0006970~response to osmotic stress                                       | 3     | 21.43 | 2.28E-03 | AT2G30250, AT2G38470, AT2G43790                                                                                                                                                                                                                                                                         | 12         | 122      | 18499     | 37.908          | 1.59E-01   | 2.85E-02  | 2.38E+00 |
| 2                         | GO:0009620~response to fungus                                               | 3     | 21.43 | 8.03E-04 | AT4G01370, AT1G73500, AT2G43790                                                                                                                                                                                                                                                                         | 12         | 72       | 18499     | 64.233          | 5.92E-02   | 1.21E-02  | 8.42E-01 |
| 2                         | GO:0009414~response to water deprivation                                    | 4     | 28.57 | 5.12E-04 | AT1G27730, AT2G38470, AT3G50310, AT2G41010                                                                                                                                                                                                                                                              | 12         | 279      | 18499     | 22.102          | 3.82E-02   | 9.68E-03  | 5.37E-01 |
| 2                         | GO:0010120~camalexin biosynthetic process                                   | 3     | 21.43 | 1.44E-05 | AT2G38470, AT1G73500, AT2G43790                                                                                                                                                                                                                                                                         | 12         | 10       | 18499     | 462.475         | 1.10E-03   | 3.65E-04  | 1.52E-02 |
| 2                         | GO:0009409~response to cold                                                 | 7     | 50.00 | 7.32E-09 | AT4G01370, AT4G29810, AT2G30250, AT1G27730, AT2G38470, AT2G43790, AT3G50310                                                                                                                                                                                                                             | 12         | 299      | 18499     | 36.091          | 5.56E-07   | 2.78E-07  | 7.70E-06 |
| 2                         | GO:0009651~response to salt stress                                          | 12    | 85.71 | 3.52E-18 | AT4G01370, AT1G28380, AT3G23250, AT4G29810, AT3G55270, AT2G30250, AT1G27730, AT2G38470, AT1G73500, AT2G43790, AT3G50310, AT2G41010                                                                                                                                                                      | 12         | 484      | 18499     | 38.221          | 2.67E-16   | 2.67E-16  | 3.70E-15 |
| 3                         | GO:0006950~response to stress                                               | 3     | 37.50 | 2.84E-04 | AT5G56030, AT2G04030, AT4G24190                                                                                                                                                                                                                                                                         | 8          | 69       | 18499     | 100.538         | 1.08E-02   | 2.16E-03  | 2.57E-01 |
| 3                         | GO:0009414~response to water deprivation                                    | 4     | 50.00 | 1.14E-04 | AT5G56030, AT2G04030, AT4G24190, AT3G50310                                                                                                                                                                                                                                                              | 8          | 279      | 18499     | 33.152          | 4.31E-03   | 1.08E-03  | 1.03E-01 |
| 3                         | GO:0006457~protein folding                                                  | 5     | 62.50 | 1.94E-06 | AT3G44110, AT1G59860, AT5G56030, AT2G04030, AT4G24190                                                                                                                                                                                                                                                   | 8          | 288      | 18499     | 40.145          | 7.38E-05   | 2.46E-05  | 1.75E-03 |

|                    |                                                                               |    |        |          |                                                                                                                                                                                                                                                                                   |    |      |       |          |          |          |          |
|--------------------|-------------------------------------------------------------------------------|----|--------|----------|-----------------------------------------------------------------------------------------------------------------------------------------------------------------------------------------------------------------------------------------------------------------------------------|----|------|-------|----------|----------|----------|----------|
| 3                  | GO:0009408~response to heat                                                   | 5  | 62.50  | 1.85E-07 | AT3G09350, AT3G44110, AT1G59860, AT5G56030, AT2G04030                                                                                                                                                                                                                             | 8  | 160  | 18499 | 72.262   | 7.03E-06 | 3.51E-06 | 1.67E-04 |
| 3                  | GO:0009651~response to salt stress                                            | 8  | 100.00 | 8.04E-12 | AT3G09350, AT3G44110, AT1G59860, AT1G53300, AT5G56030, AT2G04030, AT4G24190, AT3G50310                                                                                                                                                                                            | 8  | 484  | 18499 | 38.221   | 3.06E-10 | 3.06E-10 | 7.27E-09 |
| 4                  | GO:0006355~regulation of transcription, DNA-templated                         | 4  | 66.67  | 1.26E-02 | AT1G66350, AT2G01570, AT3G03450, AT1G14920                                                                                                                                                                                                                                        | 6  | 2119 | 18499 | 5.820    | 3.41E-01 | 2.93E-02 | 1.04E+01 |
| 4                  | GO:0010218~response to far red light                                          | 2  | 33.33  | 1.32E-02 | AT2G01570, AT1G14920                                                                                                                                                                                                                                                              | 6  | 49   | 18499 | 125.844  | 3.54E-01 | 2.88E-02 | 1.09E+01 |
| 4                  | GO:0006351~transcription, DNA-templated                                       | 4  | 66.67  | 9.03E-03 | AT1G66350, AT2G01570, AT3G03450, AT1G14920                                                                                                                                                                                                                                        | 6  | 1886 | 18499 | 6.539    | 2.59E-01 | 2.28E-02 | 7.61E+00 |
| 4                  | GO:0009737~response to abscisic acid                                          | 4  | 66.67  | 9.29E-05 | AT1G66350, AT2G01570, AT3G03450, AT1G14920                                                                                                                                                                                                                                        | 6  | 394  | 18499 | 31.301   | 3.06E-03 | 2.55E-04 | 8.10E-02 |
| 4                  | GO:0010029~regulation of seed germination                                     | 3  | 50.00  | 4.54E-05 | AT2G01570, AT3G03450, AT1G14920                                                                                                                                                                                                                                                   | 6  | 40   | 18499 | 231.238  | 1.50E-03 | 1.36E-04 | 3.96E-02 |
| 4                  | GO:0009723~response to ethylene                                               | 4  | 66.67  | 2.91E-06 | AT1G66350, AT2G01570, AT3G03450, AT1G14920                                                                                                                                                                                                                                        | 6  | 124  | 18499 | 99.457   | 9.61E-05 | 9.61E-06 | 2.54E-03 |
| 4                  | GO:0009651~response to salt stress                                            | 5  | 83.33  | 2.27E-06 | AT1G66350, AT2G01570, AT1G60220, AT3G03450, AT1G14920                                                                                                                                                                                                                             | 6  | 484  | 18499 | 31.851   | 7.48E-05 | 8.31E-06 | 1.98E-03 |
| 4                  | GO:0009739~response to gibberellin                                            | 4  | 66.67  | 1.48E-06 | AT1G66350, AT3G05120, AT3G03450, AT1G14920                                                                                                                                                                                                                                        | 6  | 99   | 18499 | 124.572  | 4.87E-05 | 6.09E-06 | 1.29E-03 |
| 4                  | GO:0042538~hyperosmotic salinity response                                     | 4  | 66.67  | 2.76E-07 | AT1G66350, AT2G01570, AT3G03450, AT1G14920                                                                                                                                                                                                                                        | 6  | 57   | 18499 | 216.363  | 9.11E-06 | 1.30E-06 | 2.41E-04 |
| 4                  | GO:0009867~jasmonic acid mediated signaling pathway                           | 4  | 66.67  | 2.09E-07 | AT1G66350, AT2G01570, AT3G03450, AT1G14920                                                                                                                                                                                                                                        | 6  | 52   | 18499 | 237.167  | 6.89E-06 | 1.15E-06 | 1.82E-04 |
| 4                  | GO:0009863~salicylic acid mediated signaling pathway                          | 4  | 66.67  | 2.46E-08 | AT1G66350, AT2G01570, AT3G03450, AT1G14920                                                                                                                                                                                                                                        | 6  | 26   | 18499 | 474.333  | 8.12E-07 | 1.62E-07 | 2.15E-05 |
| 4                  | GO:2000377~regulation of reactive oxygen species metabolic process            | 4  | 66.67  | 1.26E-08 | AT1G66350, AT2G01570, AT3G03450, AT1G14920                                                                                                                                                                                                                                        | 6  | 21   | 18499 | 587.270  | 4.15E-07 | 1.04E-07 | 1.10E-05 |
| 4                  | GO:0010187~negative regulation of seed germination                            | 4  | 66.67  | 1.26E-08 | AT1G66350, AT2G01570, AT3G03450, AT1G14920                                                                                                                                                                                                                                        | 6  | 21   | 18499 | 587.270  | 4.15E-07 | 1.04E-07 | 1.10E-05 |
| 4                  | GO:2000033~regulation of seed dormancy process                                | 4  | 66.67  | 7.96E-10 | AT1G66350, AT2G01570, AT3G03450, AT1G14920                                                                                                                                                                                                                                        | 6  | 9    | 18499 | 1370.296 | 2.63E-08 | 2.63E-08 | 6.95E-07 |
| 4                  | GO:0009740~gibberellic acid mediated signaling pathway                        | 5  | 83.33  | 1.11E-09 | AT1G66350, AT2G01570, AT3G05120, AT3G03450, AT1G14920                                                                                                                                                                                                                             | 6  | 73   | 18499 | 211.176  | 3.67E-08 | 1.84E-08 | 9.71E-07 |
| 4                  | GO:0009938~negative regulation of gibberellic acid mediated signaling pathway | 4  | 66.67  | 1.56E-09 | AT1G66350, AT2G01570, AT3G03450, AT1G14920                                                                                                                                                                                                                                        | 6  | 11   | 18499 | 1121.152 | 5.16E-08 | 1.72E-08 | 1.36E-06 |
| 5                  | GO:0006979~response to oxidative stress                                       | 3  | 60.00  | 1.45E-03 | AT3G47450, AT2G16500, AT4G34710                                                                                                                                                                                                                                                   | 5  | 291  | 18499 | 38.142   | 4.12E-02 | 1.05E-02 | 1.22E+00 |
| 5                  | GO:0008295~spermidine biosynthetic process                                    | 2  | 40.00  | 1.73E-03 | AT2G16500, AT4G34710                                                                                                                                                                                                                                                              | 5  | 8    | 18499 | 924.950  | 4.89E-02 | 9.99E-03 | 1.45E+00 |
| 5                  | GO:0006596~polyamine biosynthetic process                                     | 2  | 40.00  | 1.94E-03 | AT2G16500, AT4G34710                                                                                                                                                                                                                                                              | 5  | 9    | 18499 | 822.178  | 5.49E-02 | 9.36E-03 | 1.63E+00 |
| 5                  | GO:0006527~arginine catabolic process                                         | 2  | 40.00  | 6.49E-04 | AT2G16500, AT4G34710                                                                                                                                                                                                                                                              | 5  | 3    | 18499 | 2466.533 | 1.86E-02 | 9.36E-03 | 5.46E-01 |
| 5                  | GO:0033388~putrescine biosynthetic process from arginine                      | 2  | 40.00  | 8.65E-04 | AT2G16500, AT4G34710                                                                                                                                                                                                                                                              | 5  | 4    | 18499 | 1849.900 | 2.48E-02 | 8.33E-03 | 7.28E-01 |
| 5                  | GO:0009651~response to salt stress                                            | 4  | 80.00  | 6.98E-05 | AT3G47450, AT3G51920, AT2G16500, AT4G34710                                                                                                                                                                                                                                        | 5  | 484  | 18499 | 30.577   | 2.02E-03 | 2.02E-03 | 5.89E-02 |
| Cellular Component |                                                                               |    |        |          |                                                                                                                                                                                                                                                                                   |    |      |       |          |          |          |          |
| 1                  | GO:0009705~plant-type vacuole membrane                                        | 3  | 8.82   | 8.69E-03 | AT5G57630, AT1G15690, AT5G35410                                                                                                                                                                                                                                                   | 34 | 107  | 25147 | 20.737   | 1.89E-01 | 3.43E-02 | 6.76E+00 |
| 1                  | GO:0008287~protein serine/threonine phosphatase complex                       | 2  | 5.88   | 5.24E-03 | AT5G57050, AT4G26080                                                                                                                                                                                                                                                              | 34 | 4    | 25147 | 369.809  | 1.18E-01 | 2.49E-02 | 4.13E+00 |
| 1                  | GO:0005829~cytosol                                                            | 11 | 32.35  | 5.36E-04 | AT5G57630, AT4G40010, AT4G23650, AT1G15690, AT4G33950, AT1G60940, AT3G50500, AT5G26751, AT1G10940, AT5G66880, AT3G17980                                                                                                                                                           | 34 | 2309 | 25147 | 3.524    | 1.28E-02 | 3.21E-03 | 4.29E-01 |
| 1                  | GO:0005634~nucleus                                                            | 25 | 73.53  | 8.60E-05 | AT1G72770, AT2G26040, AT1G60940, AT5G66880, AT1G32230, AT3G61890, AT3G46930, AT2G33700, AT4G26080, AT5G46790, AT5G63650, AT3G50500, AT3G17510, AT3G17980, AT5G08590, AT1G06040, AT5G35410, AT4G33950, AT5G26751, AT1G10940, AT4G01420, AT4G17870, AT4G40010, AT5G57630, AT4G23650 | 34 | 9796 | 25147 | 1.888    | 2.06E-03 | 6.88E-04 | 6.90E-02 |
| 1                  | GO:0005737~cytoplasm                                                          | 18 | 52.94  | 8.95E-06 | AT1G16540, AT5G08590, AT1G72770, AT4G33950, AT2G26040, AT4G17615, AT4G01420, AT5G66880, AT1G32230, AT4G17870, AT2G33700, AT4G40010, AT5G57630, AT5G63650, AT5G46790, AT4G26080, AT3G50500, AT3G17510                                                                              | 34 | 4407 | 25147 | 3.021    | 2.15E-04 | 1.07E-04 | 7.18E-03 |
| 1                  | GO:0005886~plasma membrane                                                    | 18 | 52.94  | 7.53E-07 | AT5G35410, AT4G10310, AT2G26040, AT1G60940, AT4G17615, AT4G01420, AT3G47950, AT2G26650, AT4G17870, AT4G23650, AT5G27150, AT2G01980, AT1G15690, AT5G46790, AT4G26080, AT3G50500, AT3G17510, AT3G17980                                                                              | 34 | 3702 | 25147 | 3.596    | 1.81E-05 | 1.81E-05 | 6.04E-04 |
| 4                  | GO:0005634~nucleus                                                            | 6  | 100.00 | 8.96E-03 | AT1G66350, AT2G01570, AT3G05120, AT1G60220, AT3G03450, AT1G14920                                                                                                                                                                                                                  | 6  | 9796 | 25147 | 2.567    | 2.67E-02 | 2.67E-02 | 2.79E+00 |
| Molecular Function |                                                                               |    |        |          |                                                                                                                                                                                                                                                                                   |    |      |       |          |          |          |          |
| 1                  | GO:0004872~receptor activity                                                  | 3  | 8.82   | 2.39E-03 | AT4G17870, AT5G46790, AT2G26040                                                                                                                                                                                                                                                   | 34 | 40   | 18171 | 40.083   | 1.06E-01 | 1.40E-02 | 2.25E+00 |

|   |                                                                         |    |       |          |                                                                                                                                                                                                      |    |      |       |          |          |          |          |
|---|-------------------------------------------------------------------------|----|-------|----------|------------------------------------------------------------------------------------------------------------------------------------------------------------------------------------------------------|----|------|-------|----------|----------|----------|----------|
| 1 | GO:0004722~protein serine/threonine phosphatase activity                | 4  | 11.76 | 2.51E-03 | AT5G57050, AT2G33700, AT1G72770, AT4G26080                                                                                                                                                           | 34 | 150  | 18171 | 14.252   | 1.11E-01 | 1.30E-02 | 2.36E+00 |
| 1 | GO:0010427~abscisic acid binding                                        | 3  | 8.82  | 5.36E-04 | AT4G17870, AT5G46790, AT2G26040                                                                                                                                                                      | 34 | 19   | 18171 | 84.385   | 2.49E-02 | 3.60E-03 | 5.08E-01 |
| 1 | GO:0004864~protein phosphatase inhibitor activity                       | 3  | 8.82  | 3.78E-04 | AT4G17870, AT5G46790, AT2G26040                                                                                                                                                                      | 34 | 16   | 18171 | 100.208  | 1.76E-02 | 2.96E-03 | 3.58E-01 |
| 1 | GO:0005524~ATP binding                                                  | 15 | 44.12 | 2.88E-05 | AT5G08590, AT5G35410, AT4G33950, AT1G60940, AT5G26751, AT1G10940, AT5G66880, AT3G47950, AT3G46930, AT4G23650, AT4G40010, AT5G57630, AT5G63650, AT3G50500, AT3G17510                                  | 34 | 2372 | 18171 | 3.380    | 1.35E-03 | 2.71E-04 | 2.73E-02 |
| 1 | GO:0004672~protein kinase activity                                      | 9  | 26.47 | 1.79E-06 | AT5G08590, AT4G23650, AT5G35410, AT4G33950, AT1G60940, AT3G50500, AT5G26751, AT1G10940, AT5G66880                                                                                                    | 34 | 482  | 18171 | 9.979    | 8.42E-05 | 2.10E-05 | 1.70E-03 |
| 1 | GO:0016301~kinase activity                                              | 13 | 38.24 | 1.33E-07 | AT5G08590, AT4G23650, AT5G35410, AT1G60940, AT5G66880, AT3G46930, AT4G23650, AT4G40010, AT5G57630, AT5G63650, AT3G50500, AT3G17510                                                                   | 34 | 1039 | 18171 | 6.687    | 6.24E-06 | 2.08E-06 | 1.26E-04 |
| 1 | GO:0005515~protein binding                                              | 18 | 52.94 | 4.54E-09 | AT1G06040, AT1G72770, AT5G35410, AT4G33950, AT2G26040, AT5G66880, AT1G32230, AT5G57050, AT4G17870, AT2G26650, AT5G27150, AT5G57630, AT2G01980, AT5G46790, AT4G26080, AT3G50500, AT3G17510, AT3G17980 | 34 | 1901 | 18171 | 5.060    | 2.13E-07 | 2.13E-07 | 4.31E-06 |
| 1 | GO:0004674~protein serine/threonine kinase activity                     | 13 | 38.24 | 7.80E-09 | AT5G08590, AT5G35410, AT4G33950, AT1G60940, AT5G26751, AT1G10940, AT5G66880, AT4G23650, AT4G40010, AT5G57630, AT5G63650, AT3G50500, AT3G17510                                                        | 34 | 804  | 18171 | 8.641    | 3.67E-07 | 1.83E-07 | 7.41E-06 |
| 2 | GO:0004707~MAP kinase activity                                          | 2  | 14.29 | 1.38E-02 | AT4G01370, AT2G43790                                                                                                                                                                                 | 12 | 23   | 18171 | 131.674  | 2.54E-01 | 4.76E-02 | 1.02E+01 |
| 2 | GO:0044212~transcription regulatory region DNA binding                  | 3  | 21.43 | 1.52E-02 | AT3G23250, AT1G27730, AT2G38470                                                                                                                                                                      | 12 | 319  | 18171 | 14.241   | 2.75E-01 | 4.50E-02 | 1.12E+01 |
| 2 | GO:0004708~MAP kinase kinase activity                                   | 2  | 14.29 | 6.64E-03 | AT4G29810, AT1G73500                                                                                                                                                                                 | 12 | 11   | 18171 | 275.318  | 1.31E-01 | 3.44E-02 | 5.01E+00 |
| 2 | GO:0043565~sequence-specific DNA binding                                | 4  | 28.57 | 6.76E-03 | AT3G23250, AT2G30250, AT1G27730, AT2G38470                                                                                                                                                           | 12 | 676  | 18171 | 8.960    | 1.33E-01 | 2.81E-02 | 5.10E+00 |
| 2 | GO:0016301~kinase activity                                              | 5  | 35.71 | 2.54E-03 | AT4G01370, AT4G29810, AT1G73500, AT2G43790, AT3G50310                                                                                                                                                | 12 | 1039 | 18171 | 7.287    | 5.19E-02 | 2.63E-02 | 1.94E+00 |
| 2 | GO:0005515~protein binding                                              | 6  | 42.86 | 3.35E-03 | AT4G01370, AT4G29810, AT2G30250, AT2G38470, AT2G43790, AT2G41010                                                                                                                                     | 12 | 1901 | 18171 | 4.779    | 6.81E-02 | 2.32E-02 | 2.56E+00 |
| 2 | GO:0004702~receptor signaling protein serine/threonine kinase activity  | 3  | 21.43 | 4.35E-04 | AT4G29810, AT1G73500, AT3G50310                                                                                                                                                                      | 12 | 52   | 18171 | 87.361   | 9.09E-03 | 9.09E-03 | 3.35E-01 |
| 3 | GO:0005524~ATP binding                                                  | 5  | 62.50 | 3.49E-03 | AT3G44110, AT5G56030, AT2G04030, AT4G24190, AT3G50310                                                                                                                                                | 7  | 2372 | 18171 | 5.472    | 3.43E-02 | 1.73E-02 | 2.08E+00 |
| 3 | GO:0051082~unfolded protein binding                                     | 4  | 50.00 | 2.10E-06 | AT3G44110, AT5G56030, AT2G04030, AT4G24190                                                                                                                                                           | 7  | 87   | 18171 | 119.350  | 2.10E-05 | 2.10E-05 | 1.26E-03 |
| 4 | GO:0005515~protein binding                                              | 4  | 66.67 | 9.72E-03 | AT2G01570, AT3G05120, AT3G03450, AT1G14920                                                                                                                                                           | 6  | 1901 | 18171 | 6.372    | 8.41E-02 | 2.17E-02 | 5.46E+00 |
| 4 | GO:0003700~transcription factor activity, sequence-specific DNA binding | 4  | 66.67 | 7.20E-03 | AT1G66350, AT2G01570, AT3G03450, AT1G14920                                                                                                                                                           | 6  | 1711 | 18171 | 7.080    | 6.30E-02 | 2.15E-02 | 4.08E+00 |
| 4 | GO:0043565~sequence-specific DNA binding                                | 4  | 66.67 | 4.85E-04 | AT1G66350, AT2G01570, AT3G03450, AT1G14920                                                                                                                                                           | 6  | 676  | 18171 | 17.920   | 4.35E-03 | 2.18E-03 | 2.79E-01 |
| 4 | GO:0000989~transcription factor activity, transcription factor binding  | 4  | 66.67 | 2.86E-09 | AT1G66350, AT2G01570, AT3G03450, AT1G14920                                                                                                                                                           | 6  | 13   | 18171 | 931.846  | 2.57E-08 | 2.57E-08 | 1.64E-06 |
| 5 | GO:0008792~arginine decarboxylase activity                              | 2  | 40.00 | 4.40E-04 | AT2G16500, AT4G34710                                                                                                                                                                                 | 5  | 2    | 18171 | 3634.200 | 5.71E-03 | 5.71E-03 | 2.91E-01 |

**Table S13.** Gene ontology terms associated with specific gene clusters in the water stress associated gene network obtained using DAVID server. The description of the columns as in Table S7.

| Cluster                   | Term                                                                                        | Count | %     | PValue   | Genes                                                                                                                                                                                                                                                                                                                                                                                                                                                                        | List Total | Pop Hits | Pop Total | Fold Enrichment | Bonferroni | Benjamini | FDR      |
|---------------------------|---------------------------------------------------------------------------------------------|-------|-------|----------|------------------------------------------------------------------------------------------------------------------------------------------------------------------------------------------------------------------------------------------------------------------------------------------------------------------------------------------------------------------------------------------------------------------------------------------------------------------------------|------------|----------|-----------|-----------------|------------|-----------|----------|
| <b>Biological Process</b> |                                                                                             |       |       |          |                                                                                                                                                                                                                                                                                                                                                                                                                                                                              |            |          |           |                 |            |           |          |
| 1                         | GO:0045893~positive regulation of transcription, DNA-templated                              | 5     | 9.09  | 3.68E-03 | AT2G40220, AT4G27410, AT1G69600, AT5G05410, AT1G45249                                                                                                                                                                                                                                                                                                                                                                                                                        | 55         | 217      | 18499     | 7.749895        | 4.89E-01   | 3.66E-02  | 4.45E+00 |
| 1                         | GO:0006470~protein dephosphorylation                                                        | 4     | 7.27  | 3.38E-03 | AT3G16800, AT5G27930, AT1G72770, AT4G26080                                                                                                                                                                                                                                                                                                                                                                                                                                   | 55         | 103      | 18499     | 13.06196        | 4.60E-01   | 3.56E-02  | 4.10E+00 |
| 1                         | GO:0080163~regulation of protein serine/threonine phosphatase activity                      | 3     | 5.45  | 1.39E-03 | AT4G27920, AT4G17870, AT2G26040                                                                                                                                                                                                                                                                                                                                                                                                                                              | 55         | 19       | 18499     | 53.10718        | 2.23E-01   | 1.56E-02  | 1.70E+00 |
| 1                         | GO:0006950~response to stress                                                               | 4     | 7.27  | 1.08E-03 | AT1G20450, AT1G20440, AT2G04030, AT4G24190                                                                                                                                                                                                                                                                                                                                                                                                                                   | 55         | 69       | 18499     | 19.49829        | 1.78E-01   | 1.30E-02  | 1.32E+00 |
| 1                         | GO:0009688~abscisic acid biosynthetic process                                               | 3     | 5.45  | 8.57E-04 | AT1G30100, AT3G14440, AT1G52340                                                                                                                                                                                                                                                                                                                                                                                                                                              | 55         | 15       | 18499     | 67.26909        | 1.44E-01   | 1.11E-02  | 1.05E+00 |
| 1                         | GO:0042538~hyperosmotic salinity response                                                   | 4     | 7.27  | 6.15E-04 | AT2G39800, AT3G14080, AT3G14440, AT1G19120                                                                                                                                                                                                                                                                                                                                                                                                                                   | 55         | 57       | 18499     | 23.60319        | 1.06E-01   | 8.58E-03  | 7.57E-01 |
| 1                         | GO:0042542~response to hydrogen peroxide                                                    | 4     | 7.27  | 5.25E-04 | AT2G43350, AT4G26070, AT5G05410, AT1G32230                                                                                                                                                                                                                                                                                                                                                                                                                                   | 55         | 54       | 18499     | 24.91448        | 9.11E-02   | 7.93E-03  | 6.46E-01 |
| 1                         | GO:0010119~regulation of stomatal movement                                                  | 4     | 7.27  | 3.06E-04 | AT2G18960, AT2G40220, AT4G26080, AT4G33950                                                                                                                                                                                                                                                                                                                                                                                                                                   | 55         | 45       | 18499     | 29.89737        | 5.42E-02   | 5.05E-03  | 3.77E-01 |
| 1                         | GO:0010107~potassium ion import                                                             | 3     | 5.45  | 8.32E-05 | AT2G26650, AT1G30270, AT4G17615                                                                                                                                                                                                                                                                                                                                                                                                                                              | 55         | 5        | 18499     | 201.8073        | 1.50E-02   | 1.51E-03  | 1.03E-01 |
| 1                         | GO:0009788~negative regulation of abscisic acid-activated signaling pathway                 | 5     | 9.09  | 4.94E-06 | AT2G39550, AT1G08720, AT4G26080, AT5G40280, AT3G59380                                                                                                                                                                                                                                                                                                                                                                                                                        | 55         | 39       | 18499     | 43.12121        | 8.99E-04   | 1.00E-04  | 6.10E-03 |
| 1                         | GO:0009409~response to cold                                                                 | 9     | 16.36 | 2.31E-06 | AT1G20450, AT4G25480, AT1G78080, AT1G20440, AT4G26080, AT4G24190, AT3G50310, AT4G17615, AT2G42540                                                                                                                                                                                                                                                                                                                                                                            | 55         | 299      | 18499     | 10.12411        | 4.21E-04   | 5.27E-05  | 2.86E-03 |
| 1                         | GO:0010118~stomatal movement                                                                | 5     | 9.09  | 1.46E-06 | AT1G30270, AT1G12480, AT4G24020, AT4G33950, AT4G17615                                                                                                                                                                                                                                                                                                                                                                                                                        | 55         | 29       | 18499     | 57.9906         | 2.65E-04   | 3.79E-05  | 1.80E-03 |
| 1                         | GO:0009631~cold acclimation                                                                 | 6     | 10.91 | 3.72E-07 | AT1G20450, AT4G25480, AT3G14080, AT1G20440, AT1G19120, AT2G42540                                                                                                                                                                                                                                                                                                                                                                                                             | 55         | 51       | 18499     | 39.57005        | 6.77E-05   | 1.13E-05  | 4.59E-04 |
| 1                         | GO:0009737~response to abscisic acid                                                        | 13    | 23.64 | 1.13E-09 | AT1G20450, AT2G18960, AT2G39800, AT2G39550, AT1G12480, AT1G20440, AT4G26080, AT4G27410, AT4G33950, AT5G40280, AT3G50500, AT2G42540, AT1G45249                                                                                                                                                                                                                                                                                                                                | 55         | 394      | 18499     | 11.09769        | 2.06E-07   | 4.11E-08  | 1.39E-06 |
| 1                         | GO:0006970~response to osmotic stress                                                       | 10    | 18.18 | 7.25E-11 | AT2G40220, AT1G78080, AT1G20440, AT3G14440, AT4G33950, AT3G50500, AT4G17615, AT4G01420, AT2G42540, AT1G32230                                                                                                                                                                                                                                                                                                                                                                 | 55         | 122      | 18499     | 27.5693         | 1.32E-08   | 3.30E-09  | 8.95E-08 |
| 1                         | GO:0009651~response to salt stress                                                          | 16    | 29.09 | 5.04E-12 | AT1G74920, AT2G39800, AT1G78080, AT2G04030, AT4G33950, AT4G17615, AT4G01420, AT2G42540, AT1G32230, AT1G45249, AT2G26650, AT1G15690, AT4G24190, AT3G50310, AT3G50500, AT1G10370                                                                                                                                                                                                                                                                                               | 55         | 484      | 18499     | 11.11886        | 9.18E-10   | 3.06E-10  | 6.22E-09 |
| 1                         | GO:0009738~abscisic acid-activated signaling pathway                                        | 13    | 23.64 | 3.12E-13 | AT2G43350, AT1G72770, AT4G33950, AT2G26040, AT4G17615, AT1G45249, AT4G27920, AT4G17870, AT2G40220, AT1G12480, AT1G08720, AT4G26080, AT3G50500                                                                                                                                                                                                                                                                                                                                | 55         | 195      | 18499     | 22.42303        | 5.68E-11   | 2.84E-11  | 3.85E-10 |
| 1                         | GO:0009414~response to water deprivation                                                    | 42    | 76.36 | 9.21E-65 | AT1G74920, AT1G20450, AT3G14080, AT1G11755, AT3G15500, AT4G26070, AT4G24020, AT2G04030, AT1G52890, AT1G45249, AT1G32230, AT2G26650, AT4G25480, AT1G30100, AT4G27410, AT5G40280, AT3G50500, AT3G50310, AT3G59380, AT2G18960, AT2G30580, AT2G39800, AT1G30270, AT1G78080, AT2G39550, AT1G20440, AT4G33950, AT4G17615, AT4G01420, AT2G42540, AT1G06770, AT1G15690, AT2G40220, AT3G30775, AT1G08720, AT3G14440, AT1G12110, AT1G69600, AT1G19120, AT4G24190, AT5G05410, AT1G52340 | 55         | 279      | 18499     | 50.63265        | 1.68E-62   | 1.68E-62  | 1.14E-61 |
| 2                         | GO:0002679~respiratory burst involved in defense response                                   | 2     | 20.00 | 2.43E-03 | AT3G52450, AT2G35930                                                                                                                                                                                                                                                                                                                                                                                                                                                         | 10         | 5        | 18499     | 739.96          | 7.94E-02   | 1.17E-02  | 2.12E+00 |
| 2                         | GO:0000209~protein polyubiquitination                                                       | 3     | 30.00 | 1.34E-03 | AT5G59550, AT3G46620, AT3G56580                                                                                                                                                                                                                                                                                                                                                                                                                                              | 10         | 115      | 18499     | 48.25826        | 4.46E-02   | 7.57E-03  | 1.17E+00 |
| 2                         | GO:0043161~proteasome-mediated ubiquitin-dependent protein catabolic process                | 4     | 40.00 | 2.07E-04 | AT5G59550, AT3G46620, AT3G56580, AT3G13672                                                                                                                                                                                                                                                                                                                                                                                                                                   | 10         | 256      | 18499     | 28.90469        | 7.01E-03   | 1.41E-03  | 1.82E-01 |
| 2                         | GO:0042787~protein ubiquitination involved in ubiquitin-dependent protein catabolic process | 4     | 40.00 | 6.93E-05 | AT5G59550, AT3G46620, AT3G56580, AT3G13672                                                                                                                                                                                                                                                                                                                                                                                                                                   | 10         | 177      | 18499     | 41.80565        | 2.35E-03   | 5.89E-04  | 6.10E-02 |
| 2                         | GO:0009414~response to water deprivation                                                    | 6     | 60.00 | 9.03E-08 | AT5G59550, AT3G46620, AT3G52450, AT2G35930, AT1G27730, AT3G56580                                                                                                                                                                                                                                                                                                                                                                                                             | 10         | 279      | 18499     | 39.7828         | 3.07E-06   | 1.02E-06  | 7.94E-05 |
| 2                         | GO:0051865~protein autoubiquitination                                                       | 4     | 40.00 | 2.89E-08 | AT5G59550, AT3G46620, AT3G52450, AT2G35930                                                                                                                                                                                                                                                                                                                                                                                                                                   | 10         | 14       | 18499     | 528.5429        | 9.83E-07   | 4.91E-07  | 2.54E-05 |
| 2                         | GO:0010200~response to chitin                                                               | 6     | 60.00 | 2.19E-09 | AT5G59550, AT3G23250, AT3G46620, AT3G52450, AT2G35930, AT1G27730                                                                                                                                                                                                                                                                                                                                                                                                             | 10         | 133      | 18499     | 83.45414        | 7.46E-08   | 7.46E-08  | 1.93E-06 |
| 3                         | GO:0051301~cell division                                                                    | 4     | 50.00 | 5.46E-05 | AT1G18040, AT5G60410, AT5G27620, AT1G66750                                                                                                                                                                                                                                                                                                                                                                                                                                   | 8          | 218      | 18499     | 42.4289         | 2.72E-03   | 1.36E-03  | 5.25E-02 |
| 3                         | GO:0007049~cell cycle                                                                       | 4     | 50.00 | 9.61E-06 | AT1G18040, AT5G27620, AT1G66750, AT4G30820                                                                                                                                                                                                                                                                                                                                                                                                                                   | 8          | 122      | 18499     | 75.81557        | 4.80E-04   | 4.80E-04  | 9.25E-03 |
| 4                         | GO:0080170~hydrogen peroxide transmembrane transport                                        | 2     | 20.00 | 2.43E-03 | AT3G53420, AT2G36830                                                                                                                                                                                                                                                                                                                                                                                                                                                         | 10         | 5        | 18499     | 739.96          | 3.35E-02   | 4.86E-03  | 1.64E+00 |

|                    |                                                   |    |        |          |                                                                                                                                                                                                                                                                                                                                                                                      |    |      |       |          |          |          |          |
|--------------------|---------------------------------------------------|----|--------|----------|--------------------------------------------------------------------------------------------------------------------------------------------------------------------------------------------------------------------------------------------------------------------------------------------------------------------------------------------------------------------------------------|----|------|-------|----------|----------|----------|----------|
| 4                  | GO:0015840~urea transport                         | 2  | 20.00  | 1.94E-03 | AT3G16240, AT2G36830                                                                                                                                                                                                                                                                                                                                                                 | 10 | 4    | 18499 | 924.95   | 2.69E-02 | 4.53E-03 | 1.31E+00 |
| 4                  | GO:0009414~response to water deprivation          | 6  | 60.00  | 9.03E-08 | AT3G53420, AT2G37180, AT3G61430, AT1G01620, AT2G45960, AT4G00430                                                                                                                                                                                                                                                                                                                     | 10 | 279  | 18499 | 39.7828  | 1.26E-06 | 2.53E-07 | 6.13E-05 |
| 4                  | GO:0006810~transport                              | 10 | 100.00 | 2.73E-16 | AT3G53420, AT2G37180, AT3G54820, AT3G16240, AT3G61430, AT2G36830, AT4G35100, AT1G01620, AT2G45960, AT4G00430                                                                                                                                                                                                                                                                         | 10 | 349  | 18499 | 53.00573 | 3.11E-15 | 7.77E-16 | 1.55E-13 |
| 4                  | GO:0006833~water transport                        | 8  | 80.00  | 8.08E-23 | AT3G53420, AT3G54820, AT3G16240, AT3G61430, AT2G36830, AT1G01620, AT2G45960, AT4G00430                                                                                                                                                                                                                                                                                               | 10 | 11   | 18499 | 1345.382 | 1.13E-21 | 5.66E-22 | 5.49E-20 |
| 4                  | GO:0034220~ion transmembrane transport            | 9  | 90.00  | 8.23E-23 | AT3G53420, AT2G37180, AT3G54820, AT3G61430, AT2G36830, AT4G35100, AT1G01620, AT2G45960, AT4G00430                                                                                                                                                                                                                                                                                    | 10 | 28   | 18499 | 594.6107 | 1.15E-21 | 3.84E-22 | 5.59E-20 |
| 4                  | GO:0009992~cellular water homeostasis             | 10 | 100.00 | 1.78E-25 | AT3G53420, AT2G37180, AT3G54820, AT3G16240, AT3G61430, AT2G36830, AT4G35100, AT1G01620, AT2G45960, AT4G00430                                                                                                                                                                                                                                                                         | 10 | 37   | 18499 | 499.973  | 2.50E-24 | 2.50E-24 | 1.21E-22 |
| Cellular Component |                                                   |    |        |          |                                                                                                                                                                                                                                                                                                                                                                                      |    |      |       |          |          |          |          |
| 1                  | GO:0005737~cytoplasm                              | 20 | 36.36  | 1.10E-03 | AT1G20450, AT3G16800, AT5G27930, AT2G43350, AT1G30270, AT2G39800, AT1G72770, AT4G26070, AT4G33950, AT2G26040, AT4G17615, AT4G01420, AT1G32230, AT4G27920, AT1G06770, AT4G17870, AT4G26080, AT3G50310, AT3G50500, AT1G10370                                                                                                                                                           | 54 | 4407 | 25147 | 2.113389 | 4.30E-02 | 2.17E-02 | 1.00E+00 |
| 1                  | GO:0005634~nucleus                                | 34 | 61.82  | 4.97E-04 | AT1G20450, AT3G14080, AT1G72770, AT3G15500, AT4G24020, AT2G26040, AT1G52890, AT1G45249, AT1G32230, AT1G18390, AT4G25480, AT4G26080, AT4G27410, AT3G50500, AT3G59380, AT2G18960, AT3G16800, AT2G30580, AT1G30270, AT1G78080, AT2G39550, AT1G20440, AT4G33950, AT4G01420, AT4G27920, AT1G06770, AT4G17870, AT2G40220, AT3G53600, AT1G08720, AT1G69600, AT1G19120, AT4G24190, AT5G05410 | 54 | 9796 | 25147 | 1.616302 | 1.97E-02 | 1.97E-02 | 4.54E-01 |
| 2                  | GO:0000145~exocyst                                | 2  | 20.00  | 1.11E-02 | AT5G58430, AT1G07000                                                                                                                                                                                                                                                                                                                                                                 | 9  | 35   | 25147 | 159.6635 | 7.50E-02 | 2.57E-02 | 5.58E+00 |
| 2                  | GO:0070062~extracellular exosome                  | 2  | 20.00  | 1.59E-03 | AT5G58430, AT1G07000                                                                                                                                                                                                                                                                                                                                                                 | 9  | 5    | 25147 | 1117.644 | 1.11E-02 | 5.55E-03 | 8.17E-01 |
| 2                  | GO:0005829~cytosol                                | 6  | 60.00  | 2.87E-04 | AT5G59550, AT5G58430, AT1G07000, AT3G46620, AT3G52450, AT2G35930                                                                                                                                                                                                                                                                                                                     | 9  | 2309 | 25147 | 7.260575 | 2.01E-03 | 2.01E-03 | 1.48E-01 |
| 3                  | GO:0005634~nucleus                                | 8  | 100.00 | 1.36E-03 | AT1G18040, AT1G03190, AT5G60410, AT3G19600, AT5G27620, AT1G66750, AT5G64960, AT4G30820                                                                                                                                                                                                                                                                                               | 8  | 9796 | 25147 | 2.567068 | 1.22E-02 | 1.22E-02 | 7.80E-01 |
| 4                  | GO:0009941~chloroplast envelope                   | 3  | 30.00  | 1.52E-02 | AT3G16240, AT3G61430, AT2G36830                                                                                                                                                                                                                                                                                                                                                      | 10 | 543  | 25147 | 13.89337 | 2.52E-01 | 3.56E-02 | 1.08E+01 |
| 4                  | GO:0000326~protein storage vacuole                | 2  | 20.00  | 5.71E-03 | AT3G16240, AT2G36830                                                                                                                                                                                                                                                                                                                                                                 | 10 | 16   | 25147 | 314.3375 | 1.03E-01 | 1.54E-02 | 4.20E+00 |
| 4                  | GO:0042807~central vacuole                        | 2  | 20.00  | 3.57E-03 | AT3G16240, AT2G36830                                                                                                                                                                                                                                                                                                                                                                 | 10 | 10   | 25147 | 502.94   | 6.58E-02 | 1.13E-02 | 2.65E+00 |
| 4                  | GO:0005886~plasma membrane                        | 9  | 90.00  | 1.71E-06 | AT3G53420, AT2G37180, AT3G54820, AT3G16240, AT3G61430, AT4G35100, AT1G01620, AT2G45960, AT4G00430                                                                                                                                                                                                                                                                                    | 10 | 3702 | 25147 | 6.113533 | 3.26E-05 | 6.52E-06 | 1.29E-03 |
| 4                  | GO:0016020~membrane                               | 10 | 100.00 | 4.77E-11 | AT3G53420, AT2G37180, AT3G54820, AT3G16240, AT3G61430, AT4G35100, AT1G01620, AT2G45960, AT4G00430                                                                                                                                                                                                                                                                                    | 10 | 1797 | 25147 | 13.99388 | 9.06E-10 | 3.02E-10 | 3.57E-08 |
| 4                  | GO:0009506~plasmodesma                            | 9  | 90.00  | 5.63E-11 | AT3G53420, AT2G37180, AT3G54820, AT3G16240, AT3G61430, AT4G35100, AT1G01620, AT2G45960, AT4G00430                                                                                                                                                                                                                                                                                    | 10 | 1008 | 25147 | 22.45268 | 1.07E-09 | 2.68E-10 | 4.22E-08 |
| 4                  | GO:0005773~vacuole                                | 10 | 100.00 | 3.62E-15 | AT3G53420, AT2G37180, AT3G54820, AT3G16240, AT3G61430, AT2G36830, AT4G35100, AT1G01620, AT2G45960, AT4G00430                                                                                                                                                                                                                                                                         | 10 | 629  | 25147 | 39.97933 | 6.96E-14 | 3.49E-14 | 2.74E-12 |
| 4                  | GO:0005887~integral component of plasma membrane  | 10 | 100.00 | 1.96E-18 | AT3G53420, AT2G37180, AT3G54820, AT3G16240, AT3G61430, AT2G36830, AT4G35100, AT1G01620, AT2G45960, AT4G00430                                                                                                                                                                                                                                                                         | 10 | 275  | 25147 | 91.44364 | 3.73E-17 | 3.73E-17 | 1.47E-15 |
| Molecular Function |                                                   |    |        |          |                                                                                                                                                                                                                                                                                                                                                                                      |    |      |       |          |          |          |          |
| 1                  | GO:0004864~protein phosphatase inhibitor activity | 3  | 5.45   | 9.76E-04 | AT4G27920, AT4G17870, AT2G26040                                                                                                                                                                                                                                                                                                                                                      | 54 | 16   | 18171 | 63.09375 | 7.15E-02 | 3.64E-02 | 1.02E+00 |
| 1                  | GO:0010427~abscisic acid binding                  | 3  | 5.45   | 1.38E-03 | AT4G27920, AT4G17870, AT2G26040                                                                                                                                                                                                                                                                                                                                                      | 54 | 19   | 18171 | 53.13158 | 9.98E-02 | 3.44E-02 | 1.45E+00 |
| 1                  | GO:0042803~protein homodimerization activity      | 5  | 9.09   | 1.83E-03 | AT4G27920, AT4G17870, AT1G69600, AT2G04030, AT2G26040                                                                                                                                                                                                                                                                                                                                | 54 | 179  | 18171 | 9.399441 | 1.30E-01 | 3.42E-02 | 1.91E+00 |
| 1                  | GO:0005515~protein binding                        | 26 | 47.27  | 1.30E-11 | AT3G14080, AT3G15500, AT1G72770, AT4G26070, AT2G04030, AT2G26040, AT1G52890, AT1G32230, AT1G45249, AT2G26650, AT4G26080, AT5G40280, AT3G50500, AT3G59380, AT2G18960, AT2G30580, AT1G30270, AT1G78080, AT4G33950, AT4G27920, AT4G17870, AT2G40220, AT1G08720, AT1G69600, AT1G19120, AT5G05410                                                                                         | 54 | 1901 | 18171 | 4.602315 | 9.87E-10 | 9.87E-10 | 1.37E-08 |
| 2                  | GO:0008270~zinc ion binding                       | 5  | 50.00  | 9.97E-04 | AT5G59550, AT3G46620, AT1G27730, AT3G56580, AT3G13672                                                                                                                                                                                                                                                                                                                                | 8  | 1393 | 18171 | 8.152818 | 1.09E-02 | 2.74E-03 | 6.19E-01 |
| 2                  | GO:0061630~ubiquitin protein ligase activity      | 4  | 40.00  | 9.38E-05 | AT5G59550, AT3G46620, AT3G56580, AT3G13672                                                                                                                                                                                                                                                                                                                                           | 8  | 257  | 18171 | 35.35214 | 1.03E-03 | 3.44E-04 | 5.84E-02 |
| 2                  | GO:0004842~ubiquitin-protein transferase activity | 6  | 60.00  | 2.40E-07 | AT5G59550, AT3G46620, AT3G52450, AT2G35930, AT3G56580, AT3G13672                                                                                                                                                                                                                                                                                                                     | 8  | 475  | 18171 | 28.69105 | 2.64E-06 | 1.32E-06 | 1.50E-04 |



|   |                                                                      |    |        |          |                                                                                                              |    |      |       |          |          |          |          |
|---|----------------------------------------------------------------------|----|--------|----------|--------------------------------------------------------------------------------------------------------------|----|------|-------|----------|----------|----------|----------|
| 2 | GO:0016874~ligase activity                                           | 6  | 60.00  | 1.18E-08 | AT5G59550, AT3G46620, AT3G52450, AT2G35930, AT3G56580, AT3G13672                                             | 8  | 260  | 18171 | 52.41635 | 1.30E-07 | 1.30E-07 | 7.38E-06 |
| 3 | GO:0004672~protein kinase activity                                   | 3  | 37.50  | 1.35E-02 | AT1G18040, AT5G27620, AT5G64960                                                                              | 8  | 482  | 18171 | 14.13719 | 1.95E-01 | 4.26E-02 | 9.20E+00 |
| 3 | GO:0016301~kinase activity                                           | 4  | 50.00  | 5.48E-03 | AT1G18040, AT1G66750, AT5G64960, AT4G30820                                                                   | 8  | 1039 | 18171 | 8.744466 | 8.42E-02 | 2.18E-02 | 3.83E+00 |
| 3 | GO:0005515~protein binding                                           | 7  | 87.50  | 8.30E-06 | AT1G18040, AT1G03190, AT5G60410, AT5G27620, AT1G66750, AT5G64960, AT4G30820                                  | 8  | 1901 | 18171 | 8.363822 | 1.33E-04 | 6.64E-05 | 5.89E-03 |
| 3 | GO:0008353~RNA polymerase II carboxy-terminal domain kinase activity | 3  | 37.50  | 8.38E-06 | AT1G18040, AT1G66750, AT5G64960                                                                              | 8  | 12   | 18171 | 567.8438 | 1.34E-04 | 4.47E-05 | 5.95E-03 |
| 3 | GO:0004693~cyclin-dependent protein serine/threonine kinase activity | 4  | 50.00  | 3.99E-07 | AT1G18040, AT5G27620, AT1G66750, AT5G64960                                                                   | 8  | 42   | 18171 | 216.3214 | 6.39E-06 | 6.39E-06 | 2.84E-04 |
| 4 | GO:0015204~urea transmembrane transporter activity                   | 2  | 20.00  | 2.97E-03 | AT3G16240, AT2G36830                                                                                         | 10 | 6    | 18171 | 605.7    | 2.35E-02 | 5.93E-03 | 1.61E+00 |
| 4 | GO:0005215~transporter activity                                      | 6  | 60.00  | 2.80E-07 | AT3G53420, AT3G61430, AT4G35100, AT1G01620, AT2G45960, AT4G00430                                             | 10 | 344  | 18171 | 31.6936  | 2.24E-06 | 7.46E-07 | 1.53E-04 |
| 4 | GO:0015250~water channel activity                                    | 10 | 100.00 | 3.57E-25 | AT3G53420, AT2G37180, AT3G54820, AT3G16240, AT3G61430, AT2G36830, AT4G35100, AT1G01620, AT2G45960, AT4G00430 | 10 | 39   | 18171 | 465.9231 | 2.85E-24 | 1.43E-24 | 1.95E-22 |
| 4 | GO:0015254~glycerol channel activity                                 | 10 | 100.00 | 1.58E-25 | AT3G53420, AT2G37180, AT3G54820, AT3G16240, AT3G61430, AT2G36830, AT4G35100, AT1G01620, AT2G45960, AT4G00430 | 10 | 36   | 18171 | 504.75   | 1.27E-24 | 1.27E-24 | 8.68E-23 |

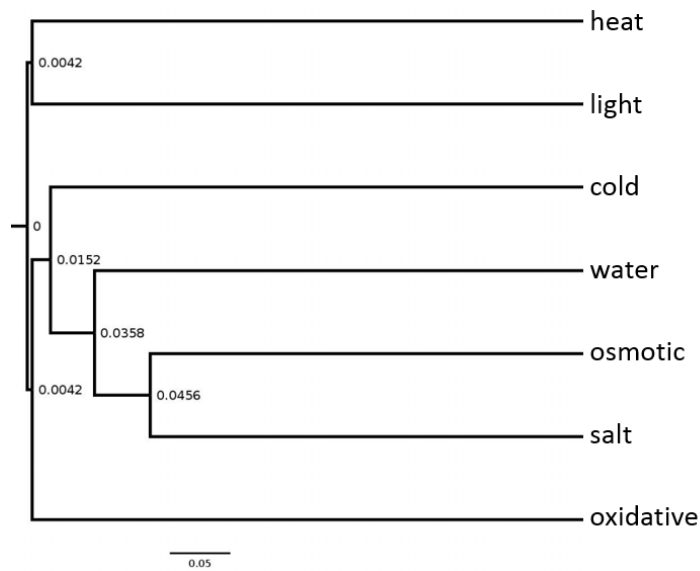

**Figure S1.** The similarity between sets of genes associated with different types of stress is shown in the form of a tree constructed by UPGMA using distances calculated on the basis of the Ochiai coefficients. The distance scale is shown in the lower left corner. The length of the branches is indicated next to them [Ochiai, A. (1957). Zoogeographic studies on the soleoid fishes found in Japan and its neighbouring regions. Bulletin of Japanese Society of Scientific Fisheries, 22, 526-530.]

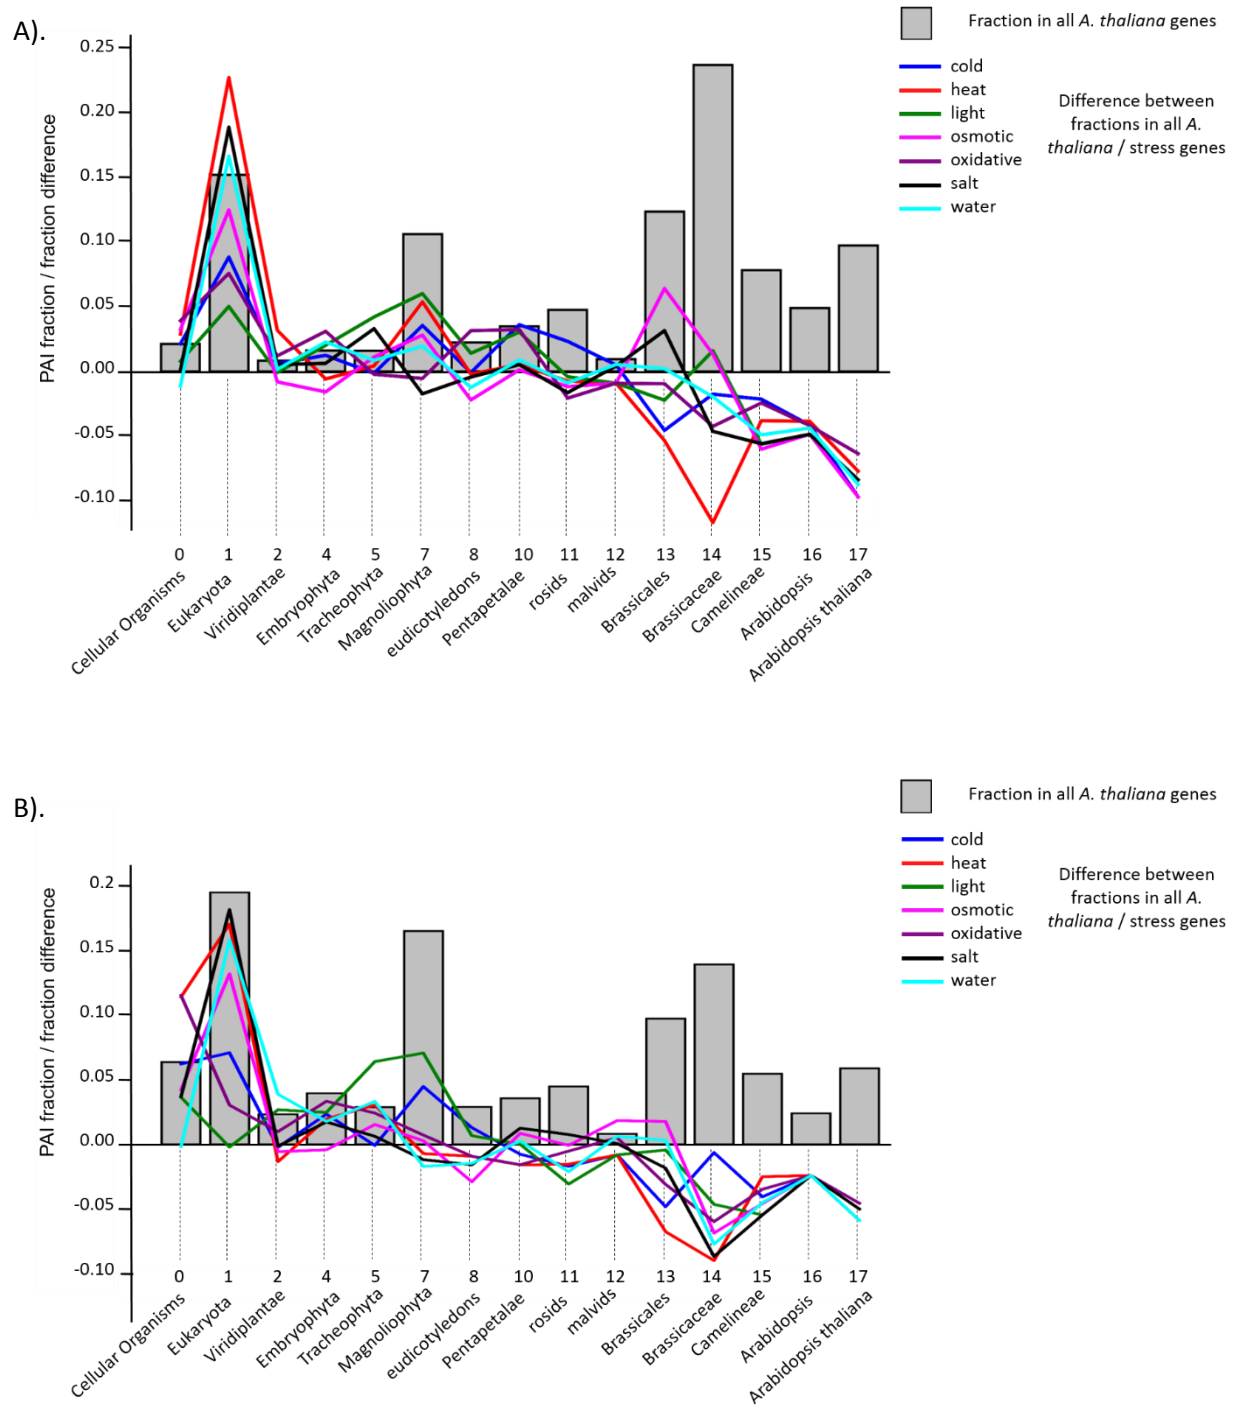

**Figure S2.** The distribution of frequencies of *A. thaliana* protein-coding genes (y-axis) by PAI (X-axis) is shown by grey bars. Solid lines indicate the values of the difference between the frequencies of occurrence of PAI values in stress dataset and all *A. thaliana* genes (dfPAI). Correspondence of the line color and stress type is shown in the box in the upper right corner. (A) distributions and frequency differences obtained by Orthoscape in the identification of homologues with sequence identity of 0.7; (B) distributions and frequency differences obtained by Orthoscape in the identification of homologues with sequence identity of 0.6;

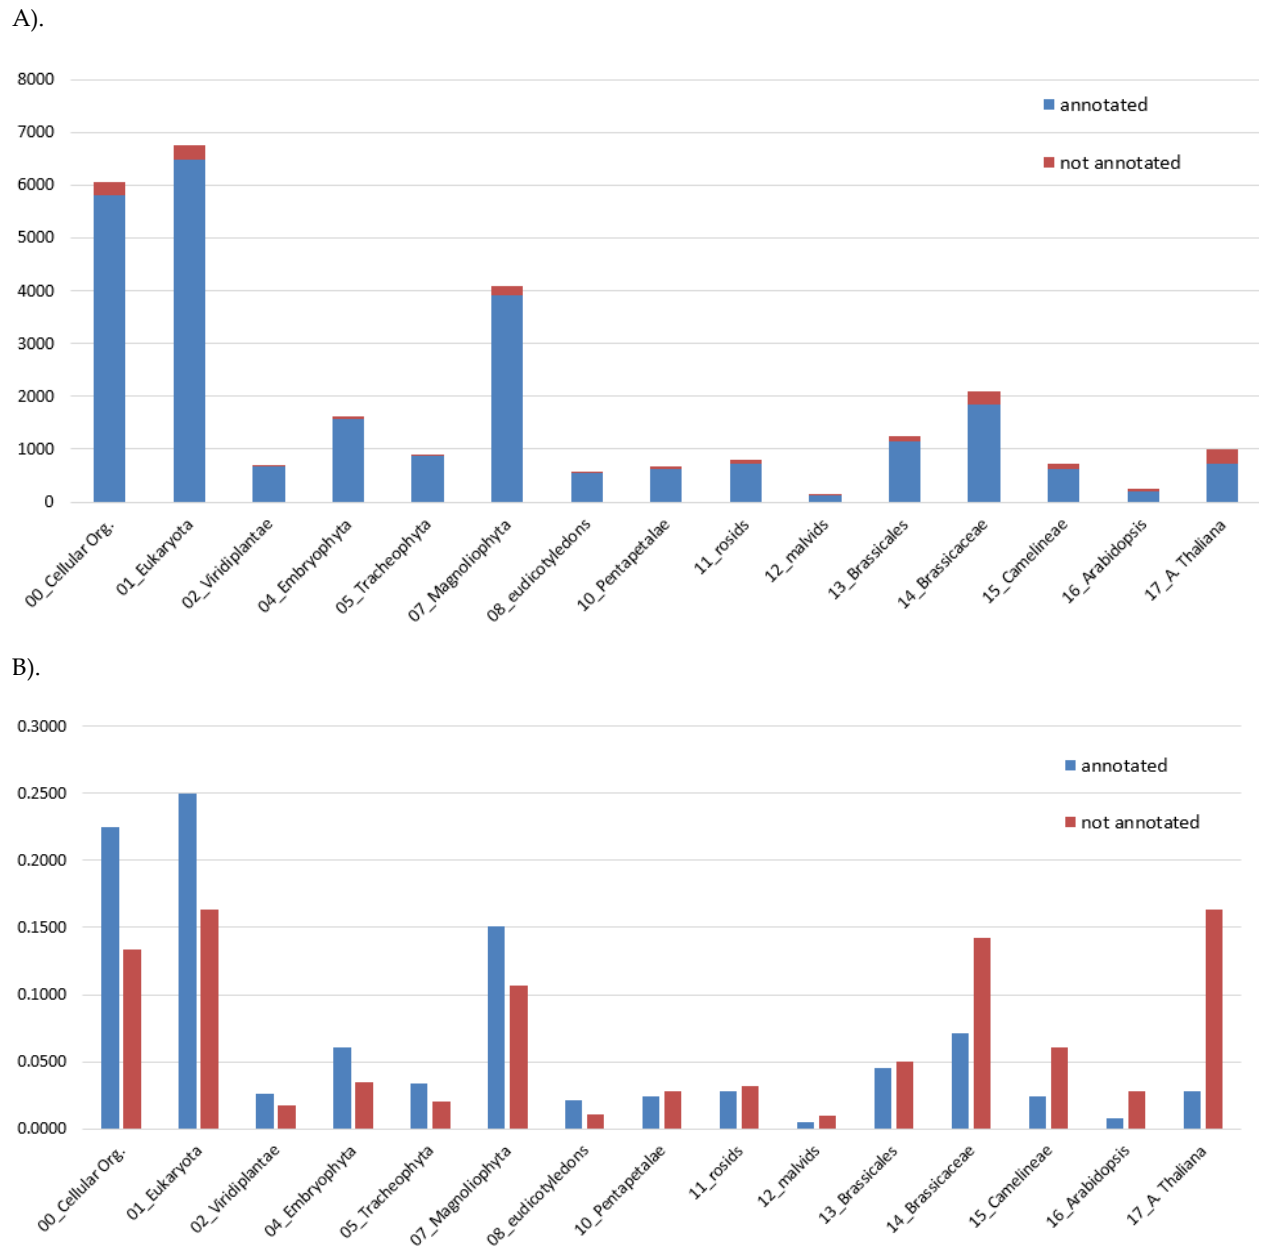

**Figure S3.** The PAI distribution for *A.thaliana* gene sets with and without GO annotation. A) Stacked column chart for gene numbers of GO annotated (blue bars) and non-annotated (red bars) gene numbers. B) The PAI frequency of occurrence distribution for GO annotated (blue bars) and non-annotated (red bars) genes.

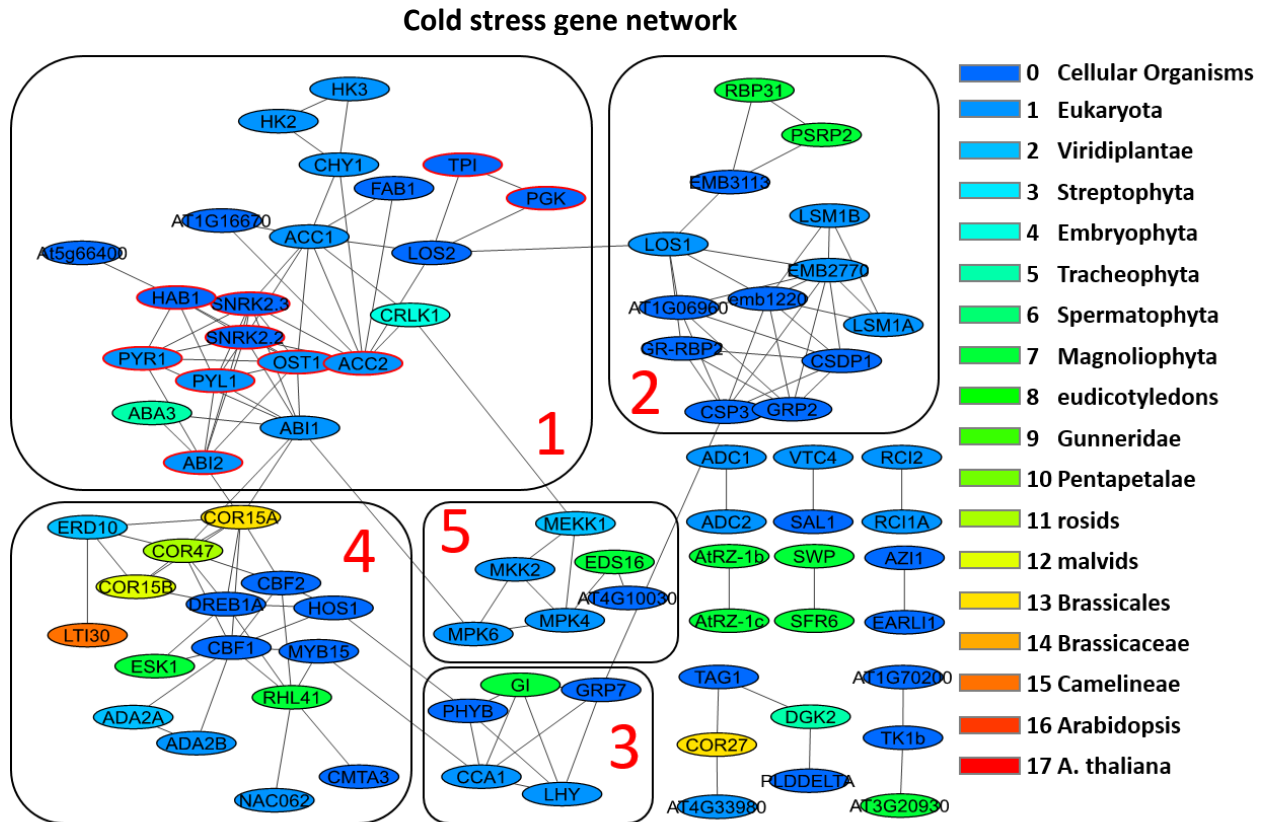

**Figure S4.** Gene network reconstructed for cold stress associated genes using STRING tool. Node color correspond to the PAI index of the gene is shown in the right panel. Nodes that added to the gene set by STRING procedure of network reconstruction outlined by red color. Clusters of genes shown by rectangles and numbered.

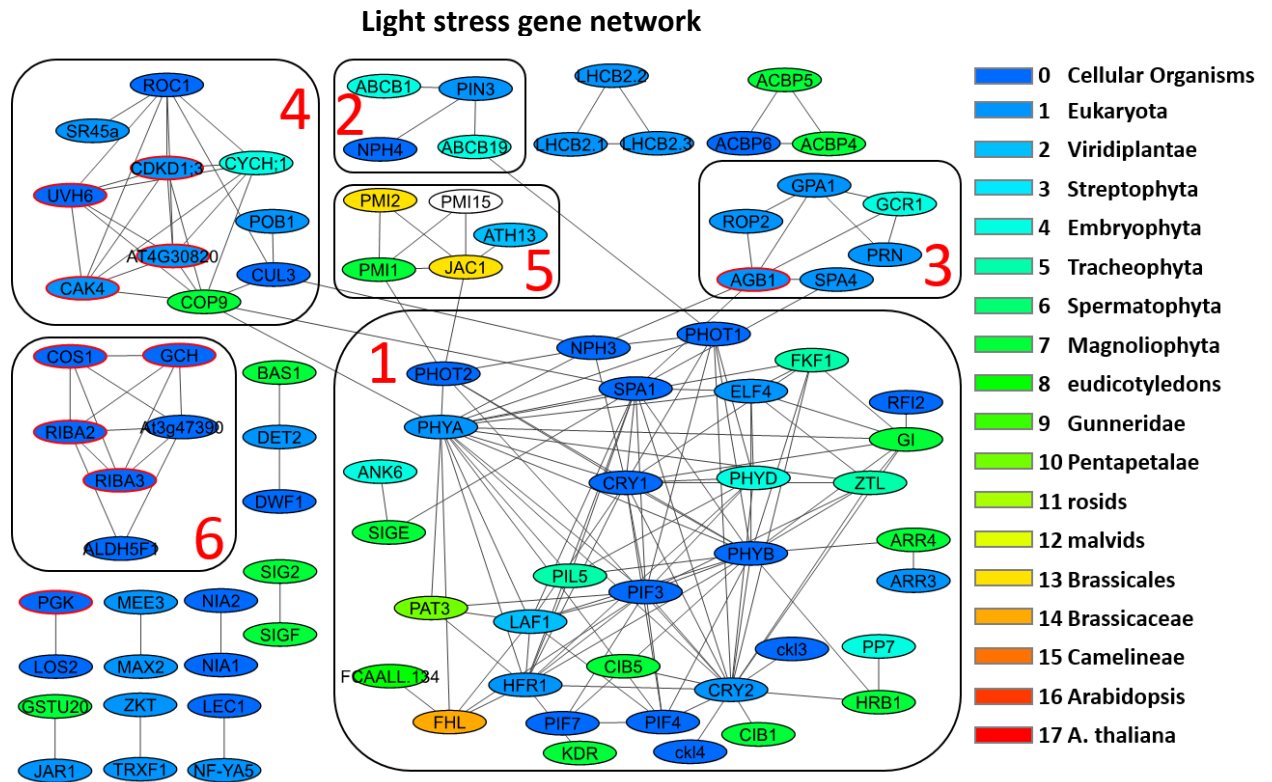

**Figure S5.** Gene network reconstructed for light stress associated genes using STRING tool. Node color correspond to the PAI index of the gene is shown in the right panel. Nodes that added to the gene set by STRING procedure of network reconstruction outlined by red color. Clusters of genes shown by rectangles and numbered. There are no data found for PMI15 gene.

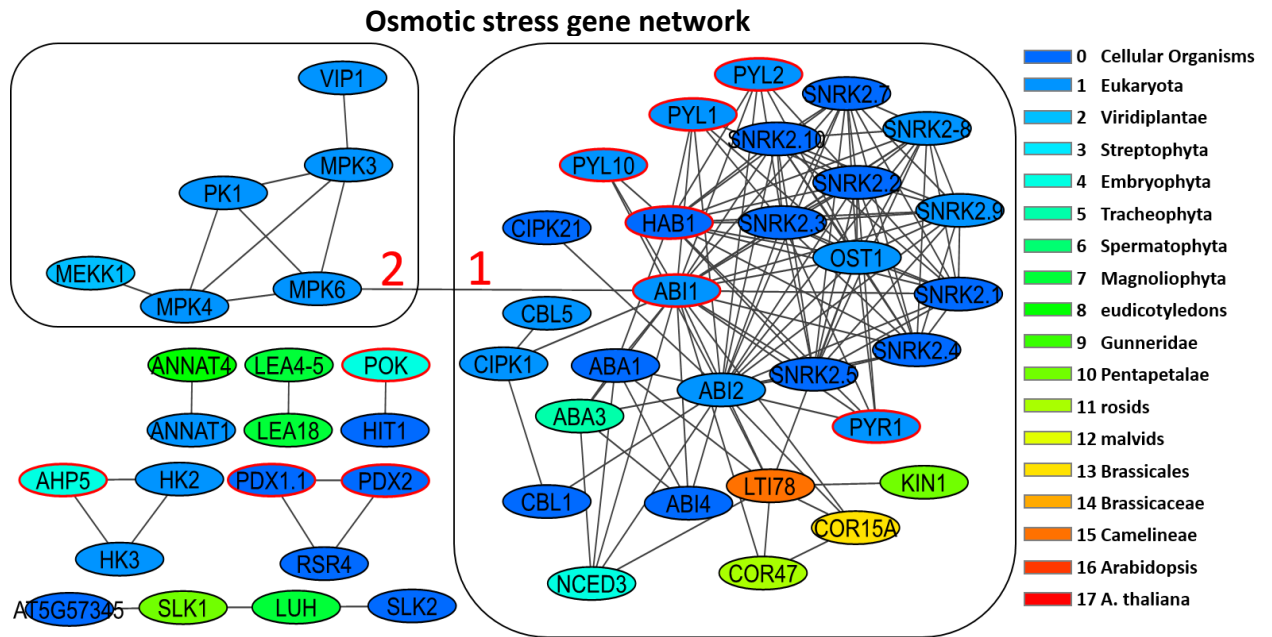

**Figure S6.** Gene network reconstructed for osmotic stress associated genes using STRING tool. Node color correspond to the PAI index of the gene is shown in the right panel. Nodes that added to the gene set by STRING procedure of network reconstruction outlined by red color. Clusters of genes shown by rectangles and numbered.

## Oxidative stress gene network

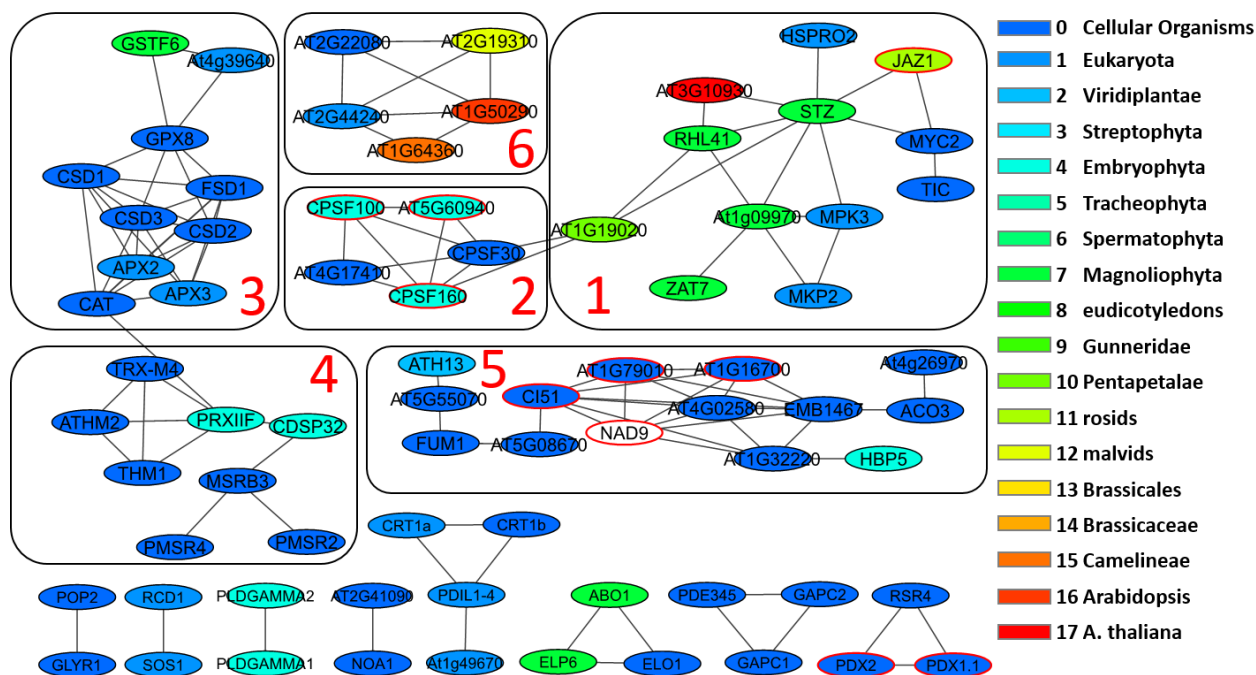

**Figure S7.** Gene network reconstructed for oxidative stress associated genes using STRING tool. Node color correspond to the PAI index of the gene is shown in the right panel. Nodes that added to the gene set by STRING procedure of network reconstruction outlined by red color. Clusters of genes shown by rectangles and numbered. There are no data found for NAD9 gene.



### Salt stress gene network

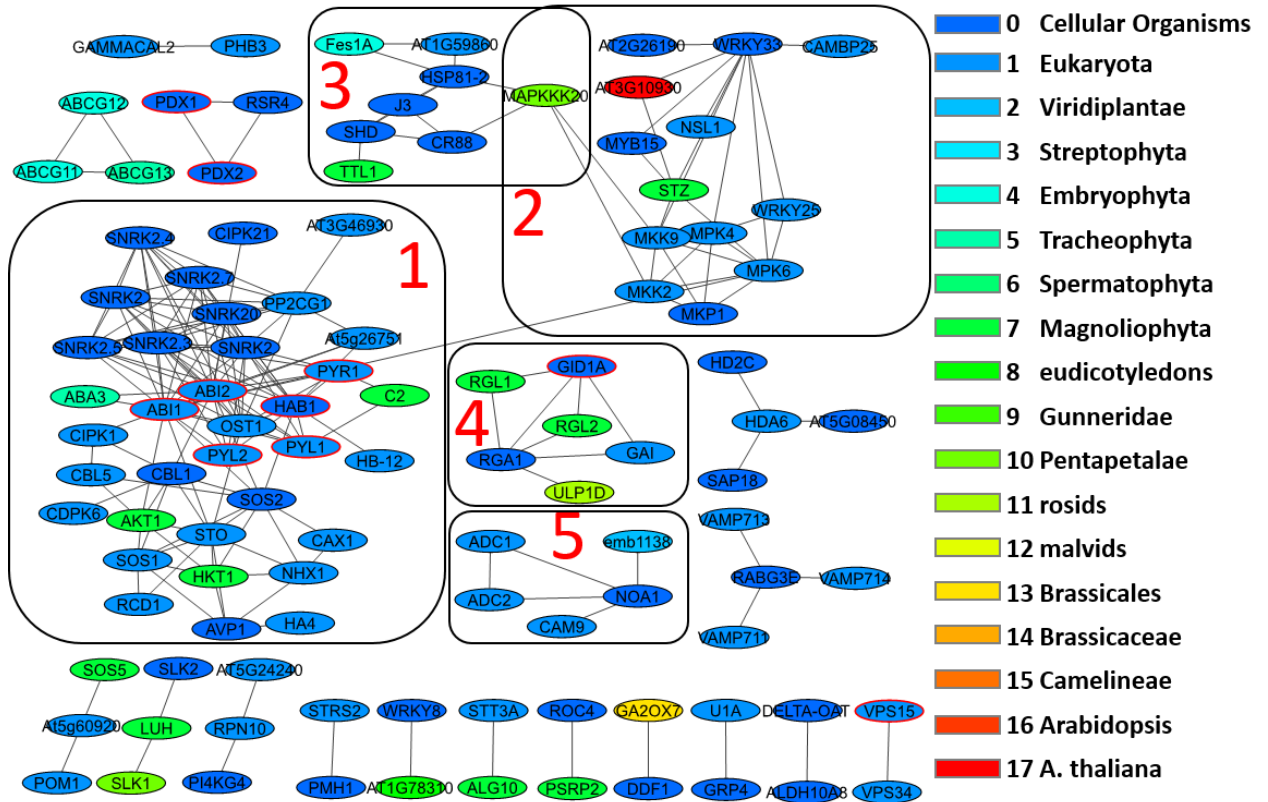

**Figure S8.** Gene network reconstructed for salt stress associated genes using STRING tool. Node color correspond to the PAI index of the gene is shown in the right panel. Nodes that added to the gene set by STRING procedure of network reconstruction outlined by red color. Clusters of genes shown by rectangles and numbered.

### Water stress gene network

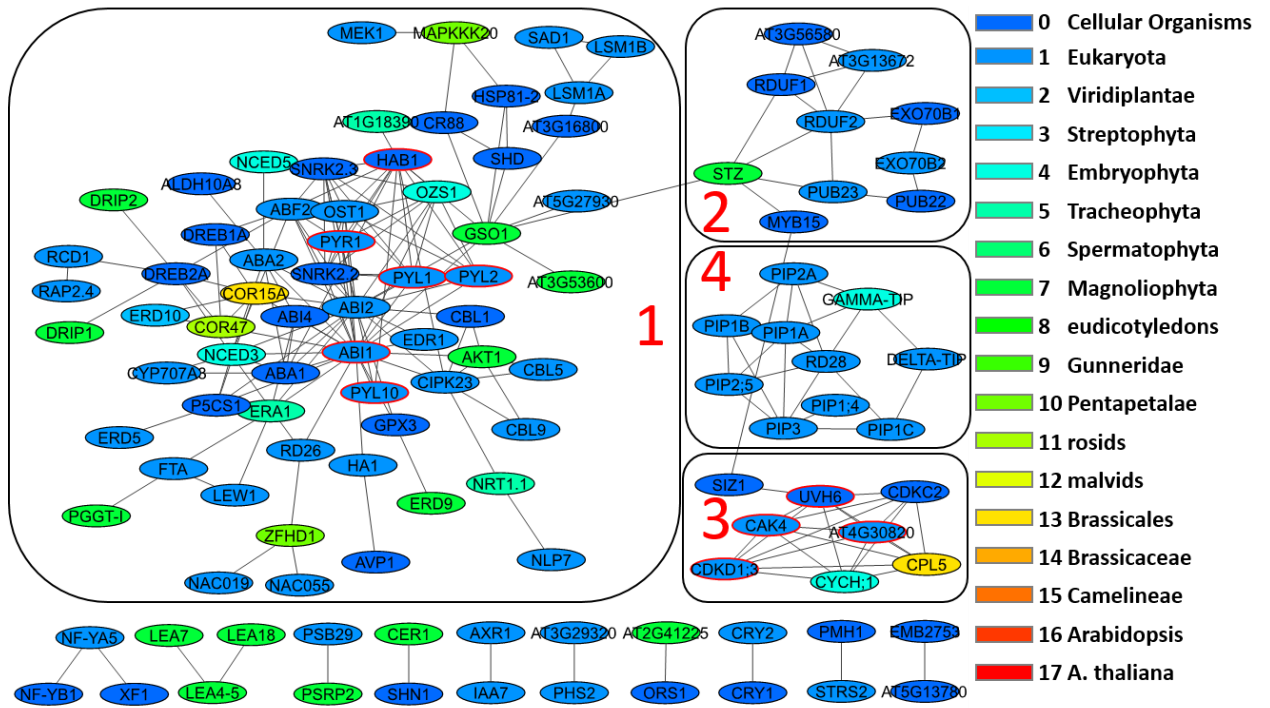

**Figure S9.** Gene network reconstructed for water stress associated genes using STRING tool. Node color correspond to the PAI index of the gene is shown in the right panel. Nodes that added to the gene set by STRING procedure of network reconstruction outlined by red color. Clusters of genes shown by rectangles and numbered.

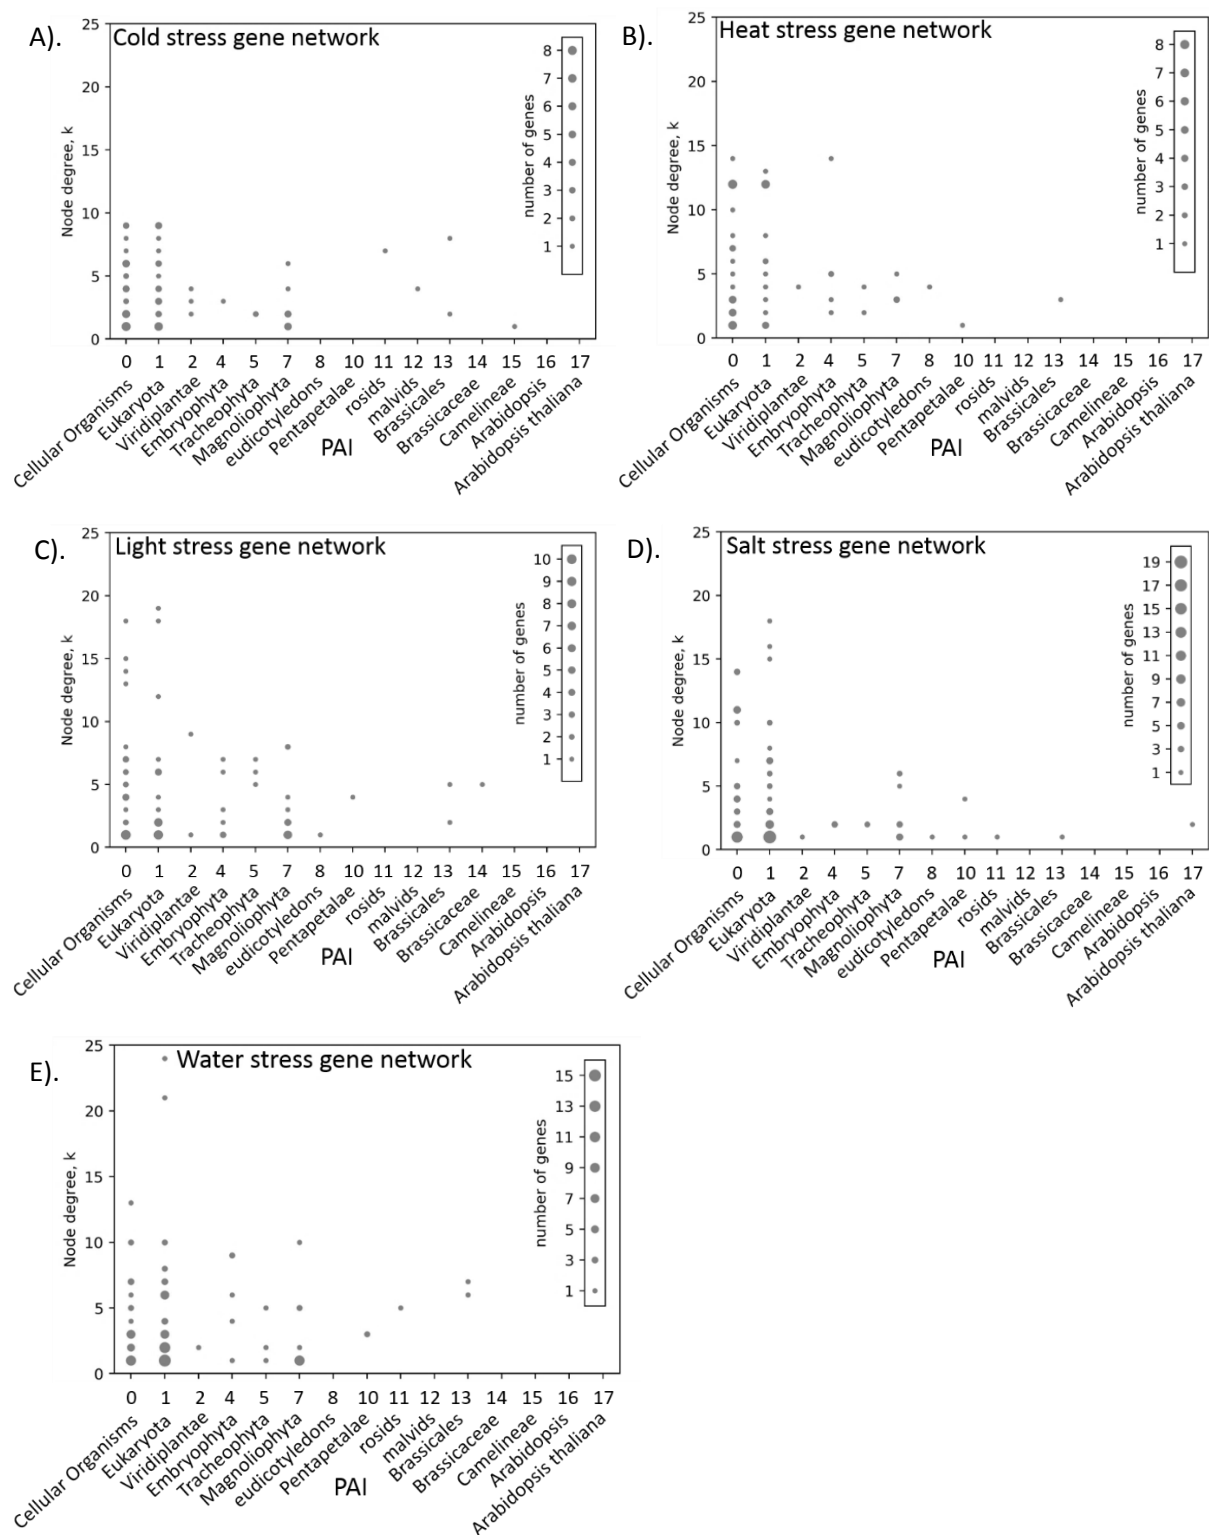

**Figure S10.** The PAI versus  $k$  scatterplots for cold (A), heat (B), light (C), salt (D), and water (E) stress gene networks. The X-axis represents the PAI, the Y-axis shows node degree  $k$ . Genes are indicated by circles. The size of the circle reflects the number of genes having these values  $k$  and PAI.

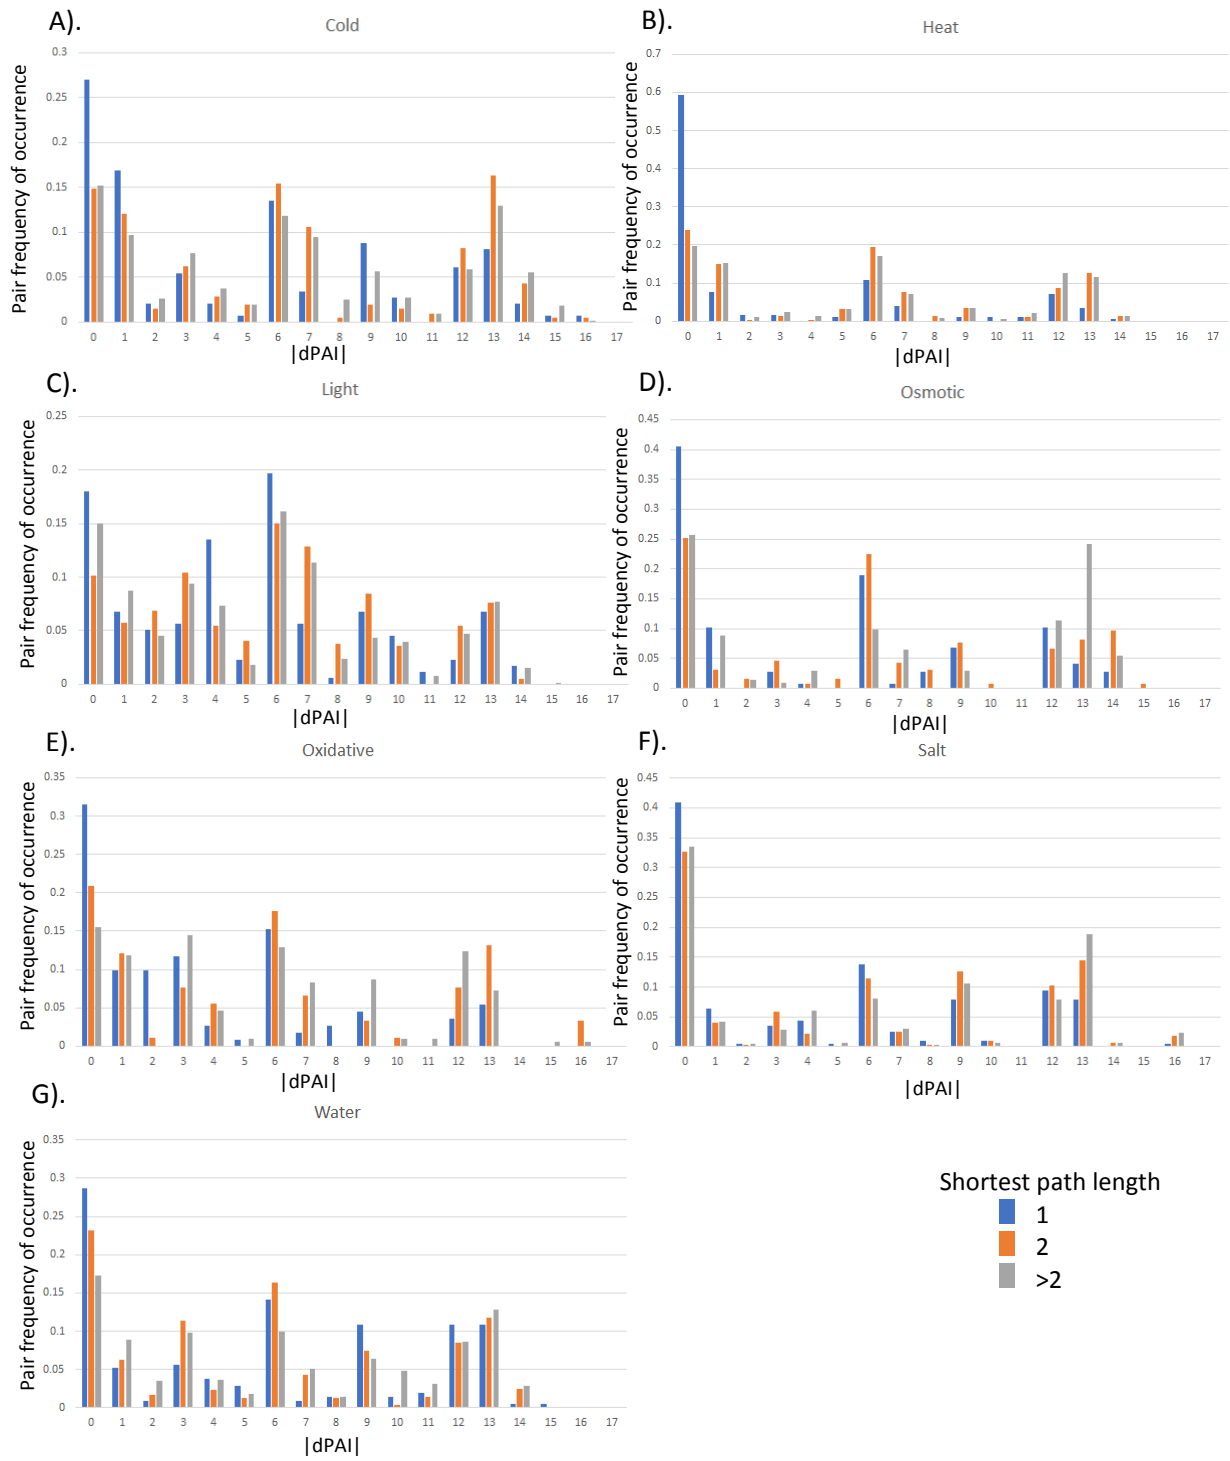

**Figure S11.** Distribution of  $|dPAI|$ , the absolute difference between the values of PAI in the node pairs of gene networks, separated by the different distances of the shortest path for different types of stress. The colors of the histograms for the different lengths of the shortest path between the graph vertices shown in the lower right panel of the figure.

## A). Biological process

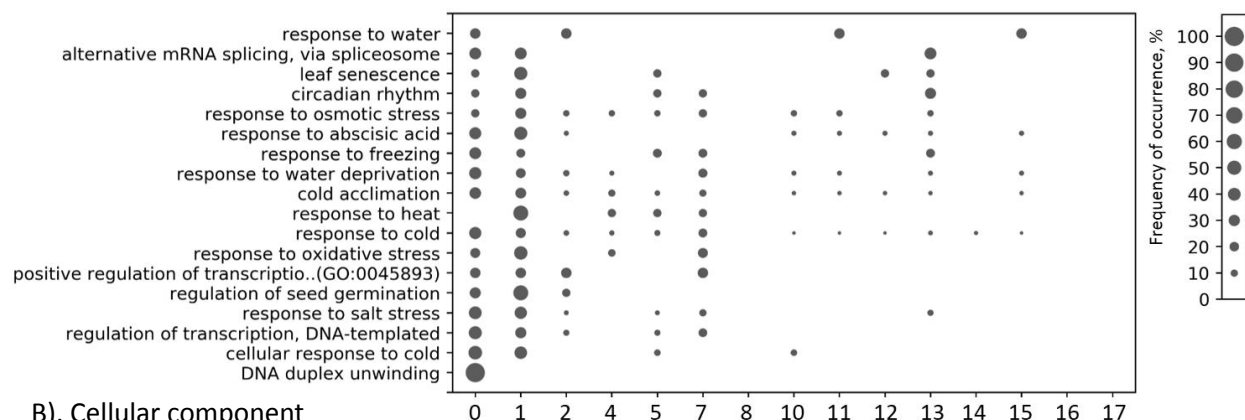

## B). Cellular component

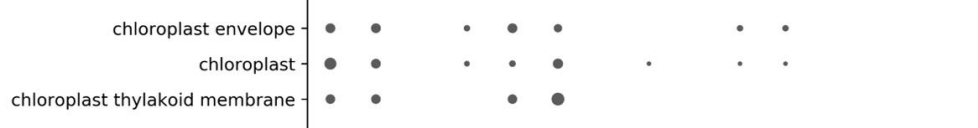

## B). Molecular function

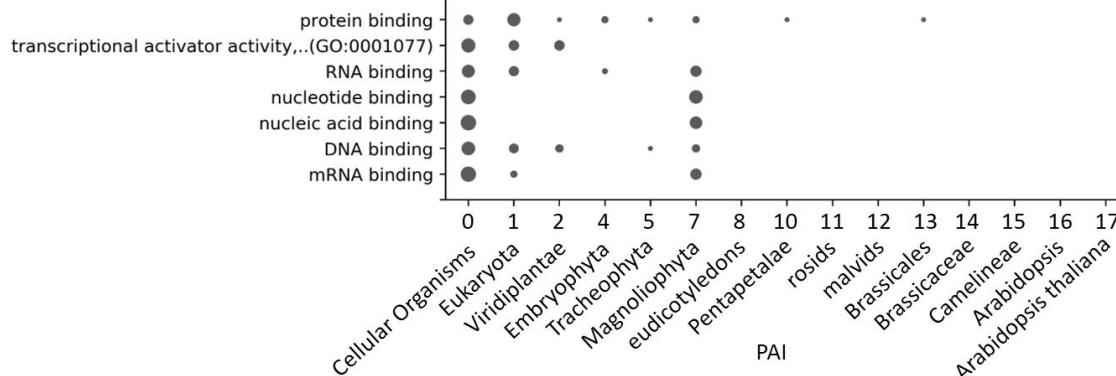

**Figure S12.** Distribution of genes associated with cold stress response and annotated with different GO terms by PAI values: (A) "biological process" GO terms; (B) "cellular component" GO terms; (C) "molecular function" GO terms.

## A). Biological process

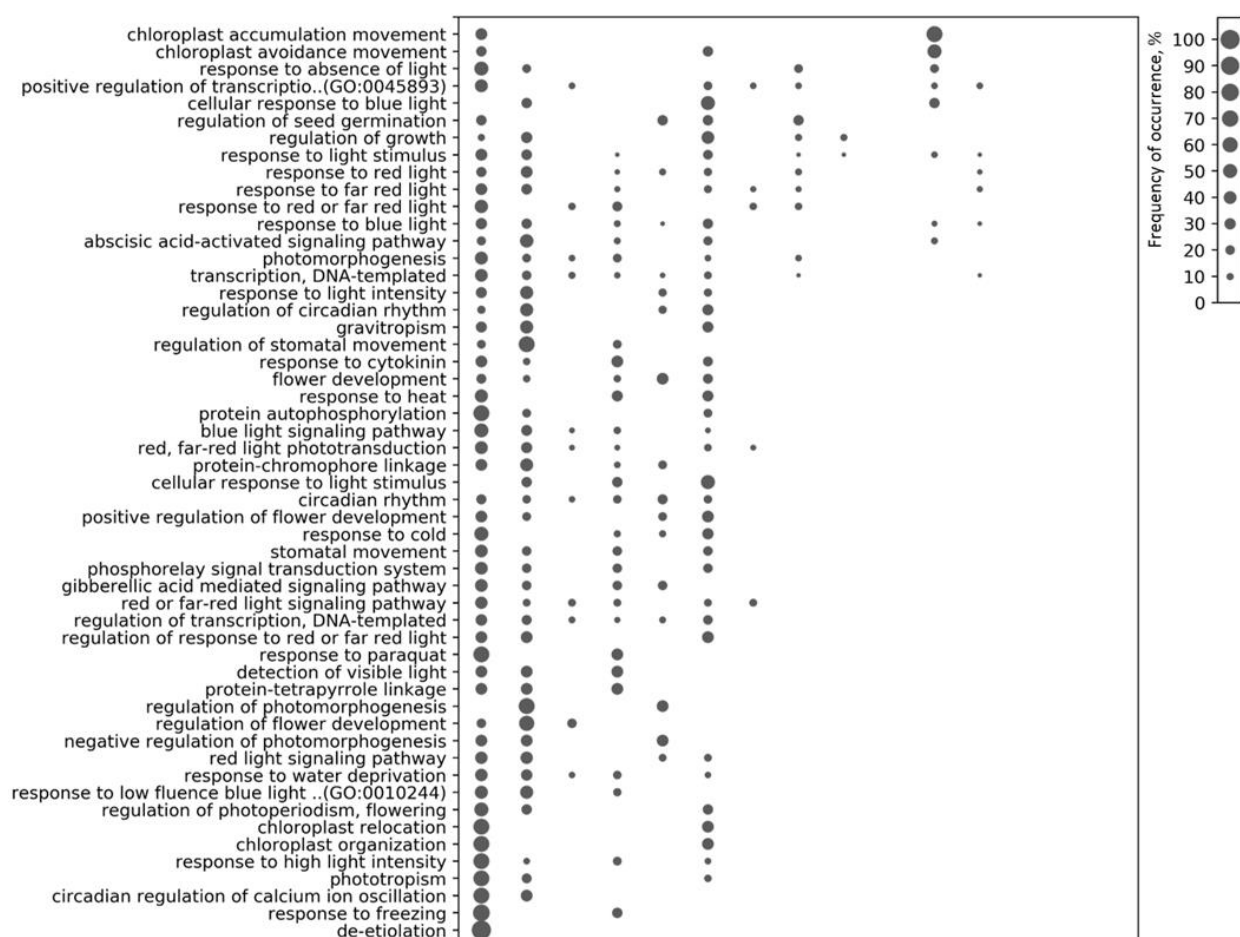

## B). Cellular component

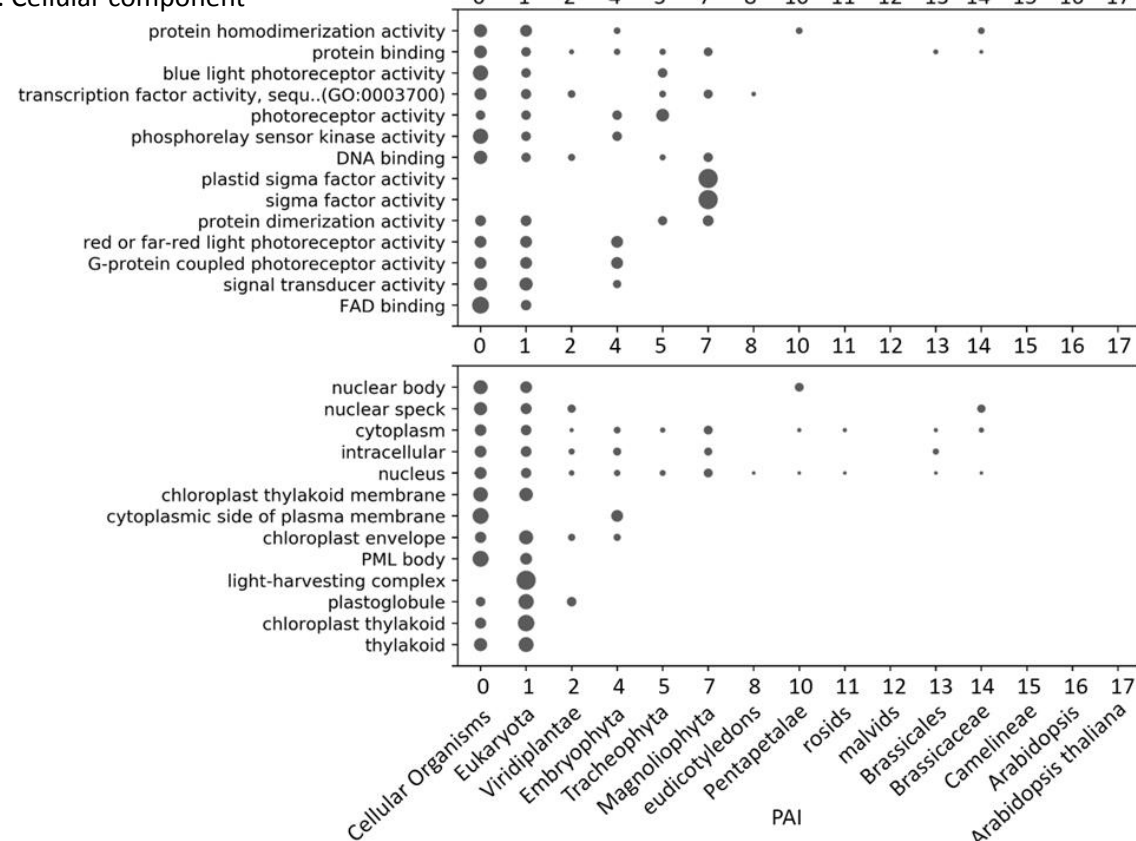

**Figure S13.** Distribution of genes associated with light stress response and annotated with different GO terms by PAI values: (A) "biological process" GO terms; (B) "cellular component" GO terms; (C) "molecular function" GO terms.

## A). Biological process

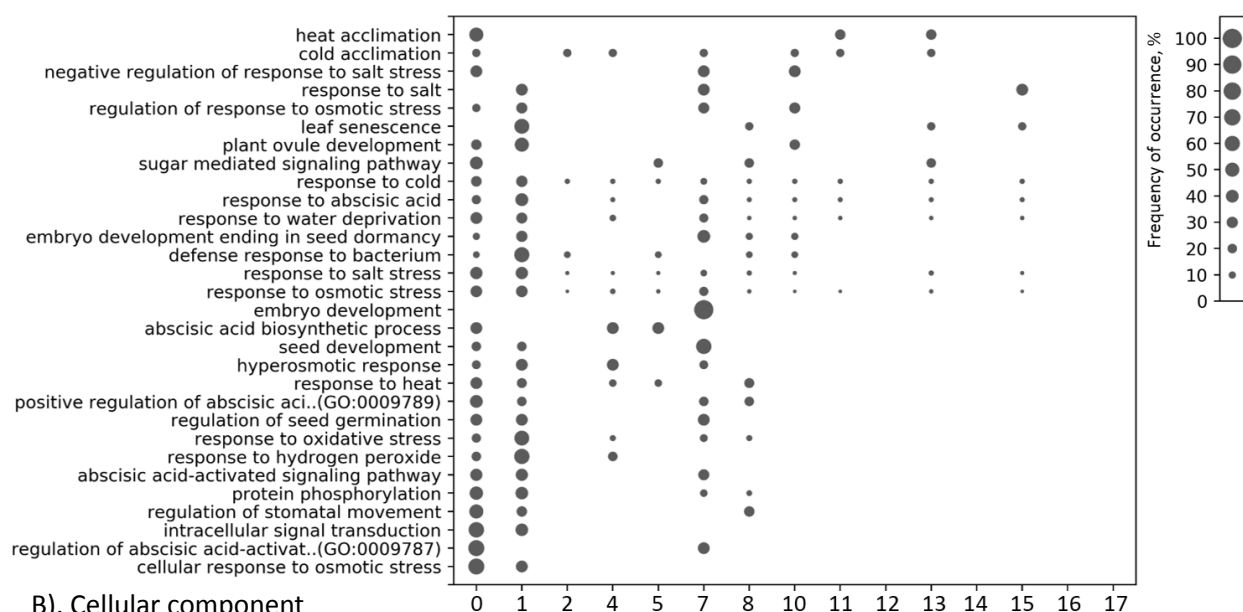

## B). Cellular component

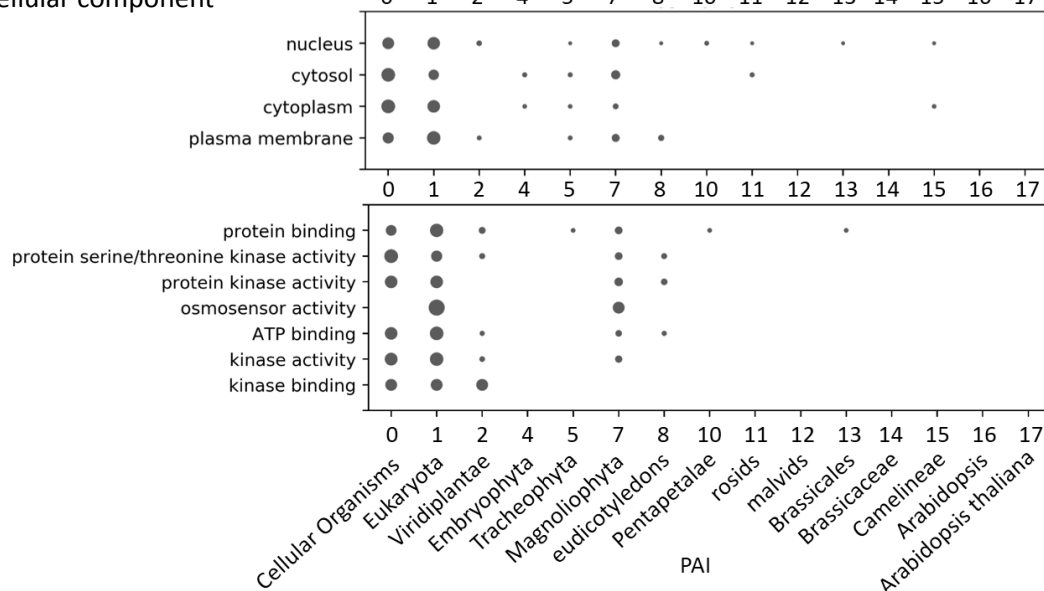

**Figure S14.** Distribution of genes associated with osmotic stress response and annotated with different GO terms by PAI values: (A) “biological process” GO terms; (B) “cellular component” GO terms; (C) “molecular function” GO terms.

## A). Biological process

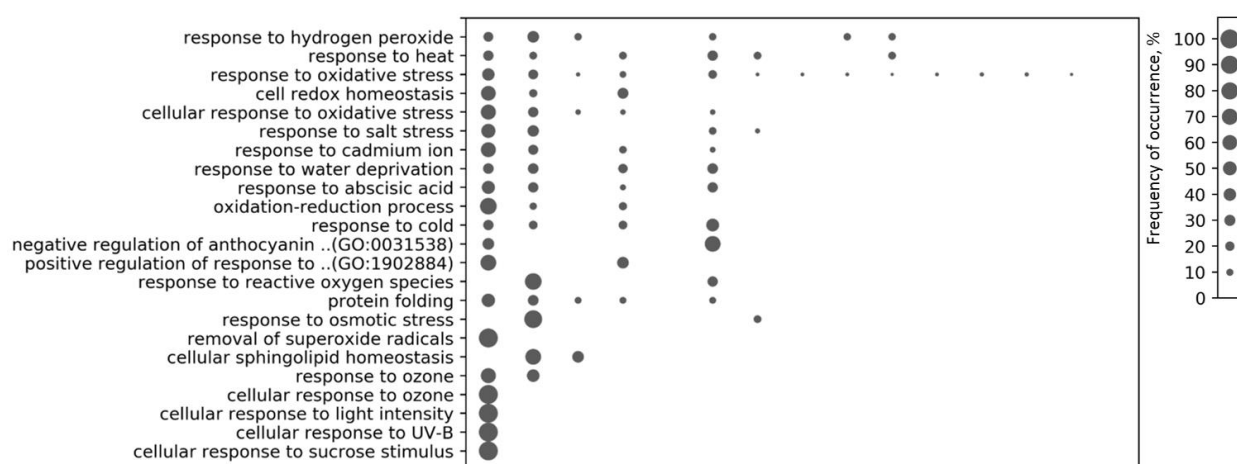

## B). Cellular component

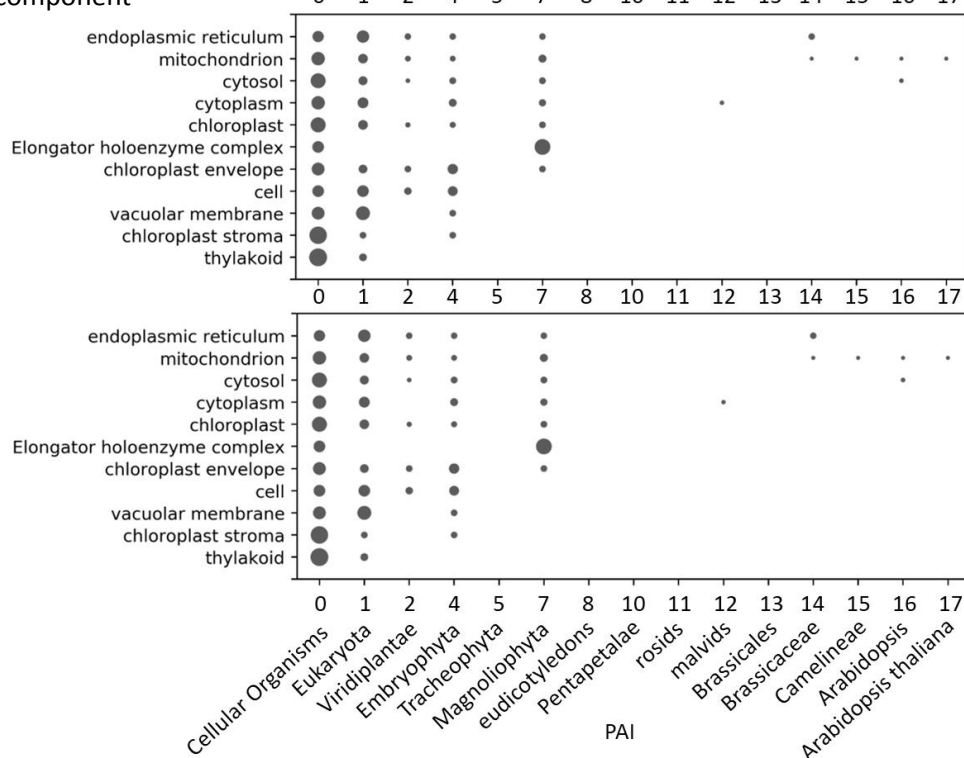

**Figure S15.** Distribution of genes associated with oxidative stress response and annotated with different GO terms by PAI values: (A) “biological process” GO terms; (B) “cellular component” GO terms; (C) “molecular function” GO terms.



## A). Biological process

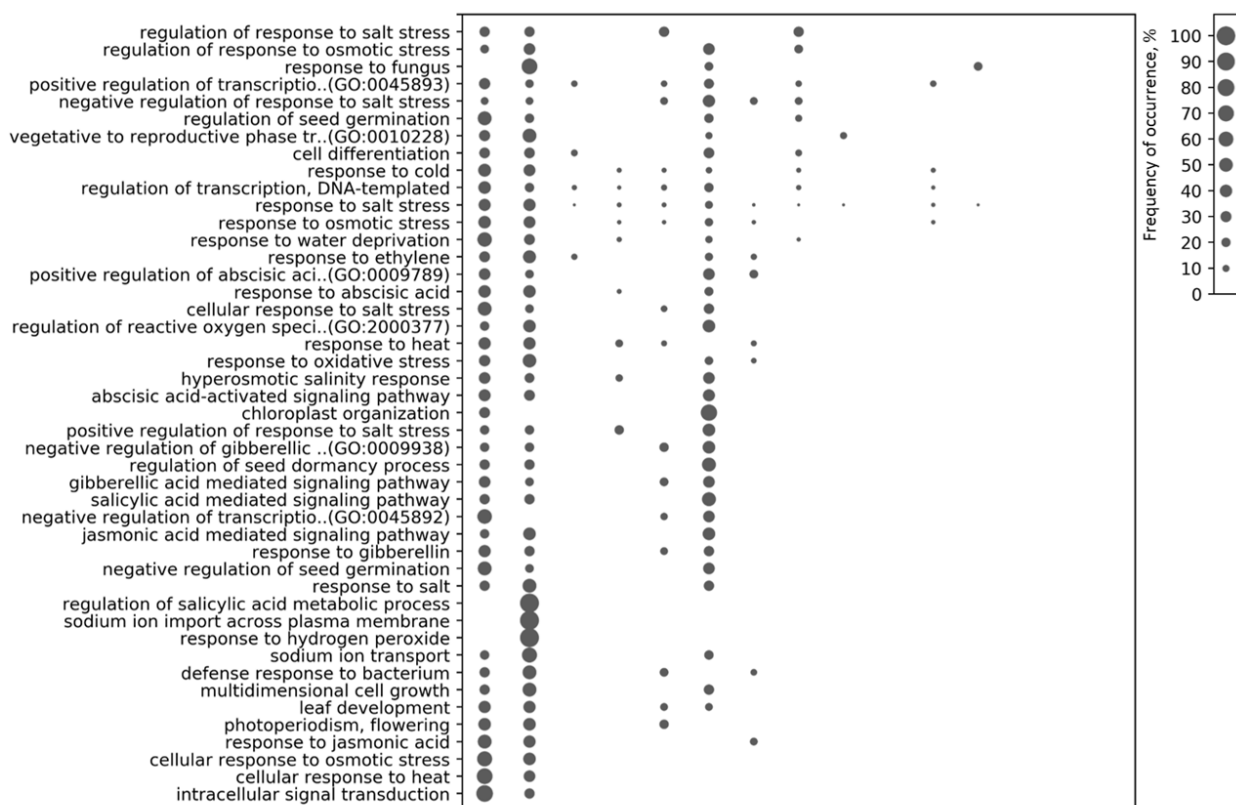

## B). Cellular component

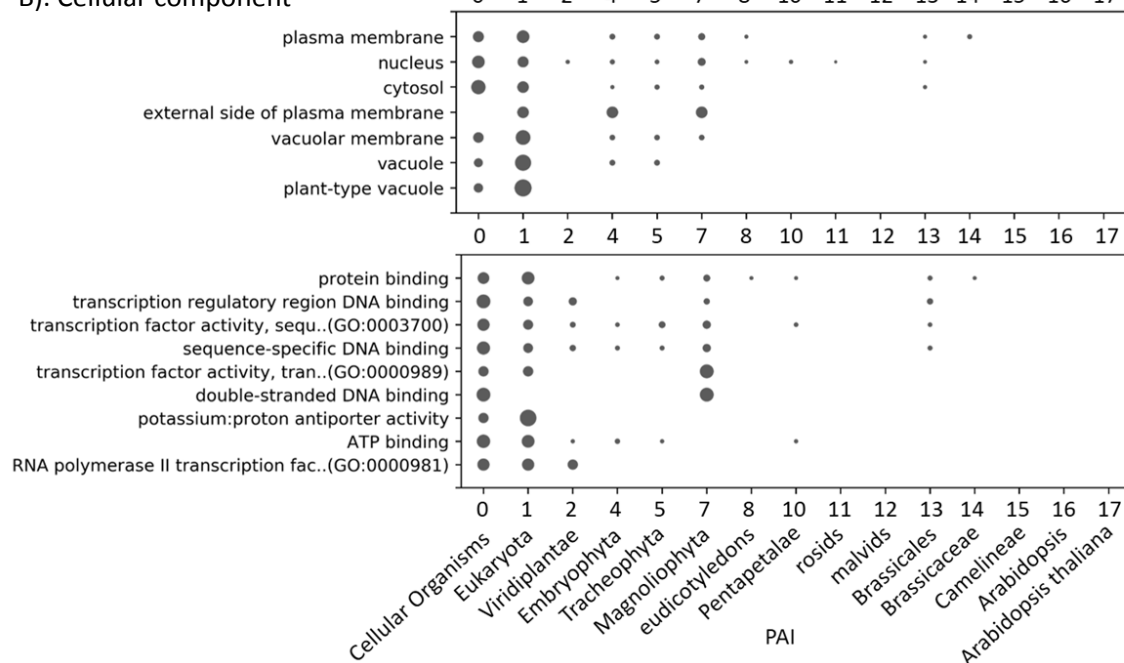

**Figure S16.** Distribution of genes associated with salt stress response and annotated with different GO terms by PAI values: (A) “biological process” GO terms; (B) “cellular component” GO terms; (C) “molecular function” GO terms.

## A). Biological process

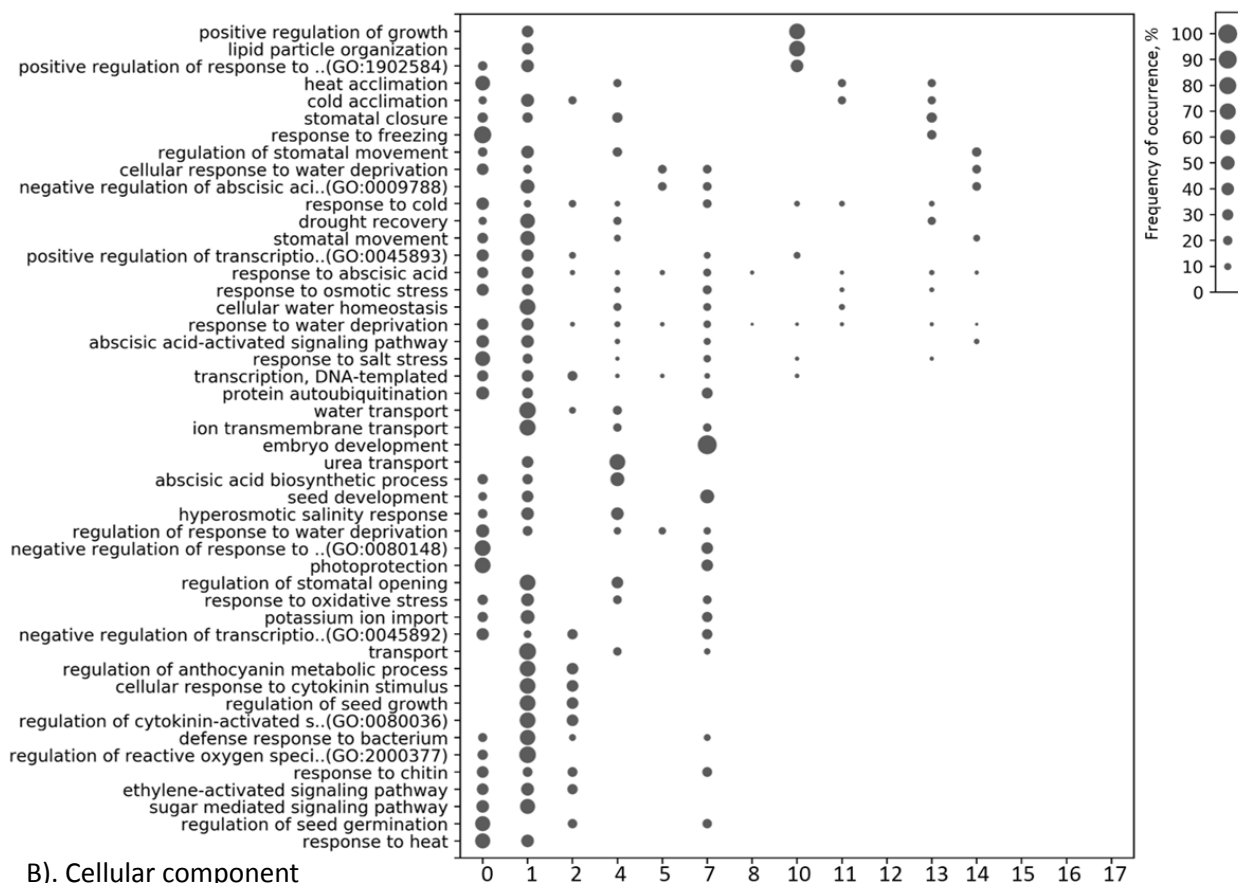

## B). Cellular component

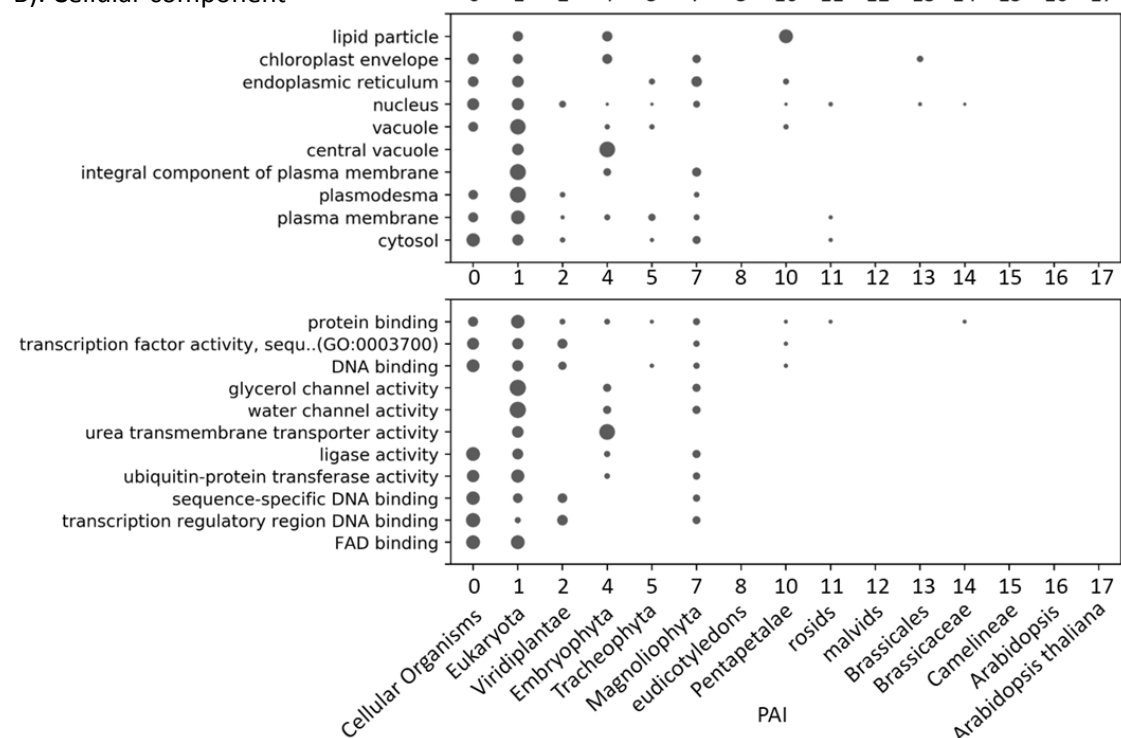

**Figure S17.** Distribution of genes associated with water stress response and annotated with different GO terms by PAI values: (A) “biological process” GO terms; (B) “cellular component” GO terms; (C) “molecular function” GO terms.
