# Supplementary material for: Phylostratigraphic Analysis Shows the Earliest Origination of the Abiotic Stress Associated Genes in A. thaliana
Source: MDPI journal article supplement (doi:10.3390/genes10120963), 2019-11-22
Supplement: s1 [file s1]

# Supplementary materials for Mustafin et al. "Phylostratigraphic Analysis Shows the Earliest Origination of the Abiotic Stress Associated Genes in *A. thaliana*"

Gene ontology terms associated with stress-associated genes obtained using DAVID server.

Columns explanation:

**Stress** – the name of the stress genes associated with.

**Term** – the ID and the name of term (separated by ~).

**Count** – the number of genes associated with term.

**%** - the proportion (in %) of genes associated with this GO compared to total number genes in cluster.

**PValue** - The threshold of EASE Score, a modified Fisher Exact P-Value, for gene-enrichment analysis. It ranges from 0 to 1. Fisher Exact P-Value = 0 represents perfect enrichment. Usually P-Value is equal or smaller than 0.05 to be considered strongly enriched in the annotation categories.

**Genes** – the list of genes associated with GO term.

**List Total** – the number of genes in stress dataset.

**Pop Hits** – how many have the function name in gene list of interest.

**Pop Total** – how many genes in GO dictionary (on the top of table) has that function name in the background genome.

**Fold Enrichment** – measure the magnitude of enrichment. Fold enrichment along with EASE score could rank the enriched terms in a more comprehensive way.

**Bonferroni** – one of the correction's of the enrichment's P-values to control family-wide false discovery rate.

**Benjamini** – one of the correction's of the enrichment's P-values to control family-wide false discovery rate.

**FDR** (False discovery rate) - represents the percentages of test which might be false positive.

| Stress             | Term                                                           | Count | %     | PValue   | Genes                                                                                                                                                                                                                                                                                                                                               | List Total | Pop Hits | Pop Total | Fold Enrichment | Bonferroni | Benjamini | FDR      |
|--------------------|----------------------------------------------------------------|-------|-------|----------|-----------------------------------------------------------------------------------------------------------------------------------------------------------------------------------------------------------------------------------------------------------------------------------------------------------------------------------------------------|------------|----------|-----------|-----------------|------------|-----------|----------|
| Biological process |                                                                |       |       |          |                                                                                                                                                                                                                                                                                                                                                     |            |          |           |                 |            |           |          |
| cold               | GO:0006979~response to oxidative stress                        | 9     | 6.25  | 1.78E-03 | AT5G59820, AT5G20230, AT2G47180, AT3G12490, AT2G43790, AT1G56600, AT2G16500, AT4G34710, AT2G40880                                                                                                                                                                                                                                                   | 142        | 291      | 18499     | 4.029113        | 4.73E-01   | 3.50E-02  | 2.41E+00 |
| cold               | GO:0045893~positive regulation of transcription, DNA-templated | 8     | 5.56  | 1.39E-03 | AT5G09410, AT3G04740, AT4G25490, AT5G64220, AT1G28520, AT1G46768, AT3G55990, AT2G46830                                                                                                                                                                                                                                                              | 142        | 217      | 18499     | 4.802752        | 3.95E-01   | 3.09E-02  | 1.89E+00 |
| cold               | GO:0009408~response to heat                                    | 7     | 4.86  | 1.42E-03 | AT5G59820, AT1G16540, AT3G53110, AT2G47180, AT4G26080, AT1G21760, AT1G28520                                                                                                                                                                                                                                                                         | 142        | 160      | 18499     | 5.699516        | 4.02E-01   | 2.98E-02  | 1.94E+00 |
| cold               | GO:000380~alternative mRNA splicing, via spliceosome           | 3     | 2.08  | 8.48E-04 | AT1G54380, AT4G24500, AT2G21660                                                                                                                                                                                                                                                                                                                     | 142        | 6        | 18499     | 65.13732        | 2.64E-01   | 2.02E-02  | 1.16E+00 |
| cold               | GO:0006355~regulation of transcription, DNA-templated          | 31    | 21.53 | 5.63E-04 | AT5G59820, AT2G22300, AT4G36020, AT3G02790, AT1G22770, AT5G62470, AT5G65050, AT4G25480, AT5G10450, AT4G36930, AT5G64220, AT4G38680, AT2G18790, AT2G46830, AT3G61950, AT5G09410, AT4G31120, AT2G46810, AT2G40970, AT4G31690, AT2G46590, AT1G01060, AT2G36530, AT2G17870, AT3G23250, AT4G25470, AT3G49530, AT4G04920, AT1G11760, AT4G16150, AT1G46768 | 142        | 2119     | 18499     | 1.905858        | 1.84E-01   | 1.55E-02  | 7.70E-01 |
| cold               | GO:0032508~DNA duplex unwinding                                | 4     | 2.78  | 6.00E-04 | AT2G21660, AT4G38680, AT4G36020, AT2G17870                                                                                                                                                                                                                                                                                                          | 142        | 22       | 18499     | 23.6863         | 1.95E-01   | 1.54E-02  | 8.22E-01 |
| cold               | GO:0009415~response to water                                   | 4     | 2.78  | 9.07E-05 | AT1G20450, AT1G20440, AT5G66400, AT3G50970                                                                                                                                                                                                                                                                                                          | 142        | 12       | 18499     | 43.42488        | 3.22E-02   | 2.97E-03  | 1.25E-01 |
| cold               | GO:0007623~circadian rhythm                                    | 7     | 4.86  | 9.86E-05 | AT1G22770, AT4G24500, AT4G36930, AT2G21660, AT1G01060, AT2G42540, AT2G46830                                                                                                                                                                                                                                                                         | 142        | 97       | 18499     | 9.401263        | 3.50E-02   | 2.96E-03  | 1.35E-01 |
| cold               | GO:0010150~leaf senescence                                     | 7     | 4.86  | 7.34E-05 | AT2G22300, AT1G27320, AT2G43790, AT2G42530, AT5G35750, AT1G11760, AT2G42540                                                                                                                                                                                                                                                                         | 142        | 92       | 18499     | 9.912201        | 2.61E-02   | 2.65E-03  | 1.01E-01 |
| cold               | GO:0010029~regulation of seed germination                      | 7     | 4.86  | 5.46E-07 | AT1G20450, AT5G15090, AT2G19450, AT5G53470, AT1G27320, AT5G35750, AT2G18790                                                                                                                                                                                                                                                                         | 142        | 40       | 18499     | 22.79806        | 1.97E-04   | 2.19E-05  | 7.51E-04 |
| cold               | GO:0050826~response to freezing                                | 6     | 4.17  | 4.42E-07 | AT5G63980, AT5G09410, AT5G38480, AT3G06510, AT2G42540, AT3G55990                                                                                                                                                                                                                                                                                    | 142        | 21       | 18499     | 37.22133        | 1.60E-04   | 1.99E-05  | 6.07E-04 |
| cold               | GO:0006970~response to osmotic stress                          | 14    | 9.72  | 9.04E-12 | AT1G16540, AT5G67590, AT2G21660, AT5G15960, AT1G20440, AT4G13850, AT1G27320, AT2G43790, AT5G35750,                                                                                                                                                                                                                                                  | 142        | 122      | 18499     | 14.94955        | 3.26E-09   | 4.66E-10  | 1.24E-08 |

|      |                                                      |    |       |           |                                                                                                                                                                                                                                                                                                                                                                                                                                                                                                                                                                                                                                                                                                                                                                                                                                                                                                                                                                                                                                                                                                |     |     |       |          |           |           |           |
|------|------------------------------------------------------|----|-------|-----------|------------------------------------------------------------------------------------------------------------------------------------------------------------------------------------------------------------------------------------------------------------------------------------------------------------------------------------------------------------------------------------------------------------------------------------------------------------------------------------------------------------------------------------------------------------------------------------------------------------------------------------------------------------------------------------------------------------------------------------------------------------------------------------------------------------------------------------------------------------------------------------------------------------------------------------------------------------------------------------------------------------------------------------------------------------------------------------------------|-----|-----|-------|----------|-----------|-----------|-----------|
|      |                                                      |    |       |           | AT4G04920, AT4G34710, AT4G08500, AT2G42540, AT5G06760                                                                                                                                                                                                                                                                                                                                                                                                                                                                                                                                                                                                                                                                                                                                                                                                                                                                                                                                                                                                                                          |     |     |       |          |           |           |           |
| cold | GO:0009737~response to abscisic acid                 | 26 | 18.06 | 2.60E-16  | AT1G20450, AT3G53110, AT5G15960, AT2G47180, AT2G19450, AT1G56600, AT2G42530, AT3G05890, AT5G62470, AT4G26080, AT5G53470, AT4G38680, AT3G50970, AT2G46830, AT1G20440, AT5G66400, AT1G01060, AT1G29395, AT4G34710, AT2G42540, AT2G36530, AT4G12480, AT4G01370, AT3G05880, AT2G43790, AT5G35750                                                                                                                                                                                                                                                                                                                                                                                                                                                                                                                                                                                                                                                                                                                                                                                                   | 142 | 394 | 18499 | 8.596804 | 8.02E-14  | 1.33E-14  | 3.00E-13  |
| cold | GO:0009651~response to salt stress                   | 30 | 20.83 | 3.72E-18  | AT2G47180, AT2G19450, AT4G13850, AT1G27320, AT2G16500, AT1G56600, AT4G36020, AT5G63980, AT5G62470, AT3G05890, AT2G21660, AT4G29810, AT5G50950, AT2G46830, AT1G16540, AT4G24500, AT2G38170, AT5G04280, AT1G01060, AT4G34710, AT2G42540, AT2G36530, AT4G12480, AT4G01370, AT1G60650, AT3G23250, AT2G43790, AT5G35750, AT4G08500, AT3G55990                                                                                                                                                                                                                                                                                                                                                                                                                                                                                                                                                                                                                                                                                                                                                       | 142 | 484 | 18499 | 8.074875 | 1.34E-15  | 2.69E-16  | 5.11E-15  |
| cold | GO:0070417~cellular response to cold                 | 13 | 9.03  | 2.95E-18  | AT1G54380, AT4G12470, AT5G20230, AT3G61580, AT2G46210, AT5G62390, AT1G20823, AT1G60170, AT1G27320, AT1G29395, AT5G35750, AT3G49530, AT1G29390                                                                                                                                                                                                                                                                                                                                                                                                                                                                                                                                                                                                                                                                                                                                                                                                                                                                                                                                                  | 142 | 31  | 18499 | 54.6313  | 1.06E-15  | 2.66E-16  | 4.05E-15  |
| cold | GO:0009414~response to water deprivation             | 28 | 19.44 | 2.60E-22  | AT1G20450, AT3G14080, AT5G15960, AT2G47180, AT4G13850, AT1G27320, AT1G56600, AT1G28520, AT4G36020, AT2G40880, AT5G63980, AT5G62470, AT4G25480, AT2G21660, AT4G38680, AT3G50970, AT5G04280, AT1G20440, AT5G66400, AT2G42540, AT5G06760, AT1G60650, AT4G25490, AT3G12490, AT1G19120, AT5G35750, AT3G55990, AT1G46768                                                                                                                                                                                                                                                                                                                                                                                                                                                                                                                                                                                                                                                                                                                                                                             | 142 | 279 | 18499 | 13.07416 | 9.40E-20  | 3.13E-20  | 3.58E-19  |
| cold | GO:0009631~cold acclimation                          | 41 | 28.47 | 1.94E-77  | AT1G20450, AT5G59820, AT3G14080, AT5G54590, AT5G15960, AT4G13850, AT2G42530, AT1G28520, AT4G36020, AT3G53460, AT4G12470, AT1G74960, AT4G25480, AT5G38480, AT4G29810, AT1G56070, AT1G77490, AT4G38680, AT3G50970, AT3G26420, AT4G16420, AT3G55580, AT2G38170, AT3G04740, AT1G10760, AT1G20440, AT5G66400, AT1G29395, AT2G42540, AT1G29390, AT2G17870, AT5G67590, AT4G25470, AT4G04800, AT4G25490, AT1G36160, AT1G19120, AT4G24770, AT4G04920, AT1G11760, AT4G08500                                                                                                                                                                                                                                                                                                                                                                                                                                                                                                                                                                                                                              | 142 | 51  | 18499 | 104.7306 | 7.01E-75  | 3.50E-75  | 2.67E-74  |
| cold | GO:0009409~response to cold                          | 96 | 66.67 | 8.18E-141 | AT1G20450, AT5G63770, AT3G02870, AT3G08920, AT4G10030, AT5G15960, AT2G22300, AT4G13850, AT3G21300, AT1G60170, AT3G07740, AT4G36020, AT5G65940, AT2G40880, AT1G22770, AT5G63980, AT3G11170, AT4G25480, AT4G36930, AT5G52440, AT1G56070, AT4G03430, AT5G53470, AT4G38680, AT3G50970, AT2G18790, AT1G16540, AT2G40970, AT4G24500, AT2G46590, AT4G31690, AT3G22370, AT2G36530, AT2G17870, AT1G60650, AT5G15090, AT4G25490, AT5G42900, AT3G12490, AT1G21760, AT2G43790, AT1G33410, AT4G24770, AT4G08500, AT2G01918, AT1G46768, AT5G59820, AT2G39810, AT5G54590, AT3G53110, AT2G33800, AT4G28210, AT2G47180, AT1G01860, AT4G35790, AT2G19450, AT2G20990, AT1G27320, AT1G70200, AT2G42530, AT2G16500, AT1G56600, AT2G46090, AT3G53460, AT2G37230, AT1G05140, AT3G05890, AT5G17890, AT2G21660, AT4G29810, AT5G38480, AT5G67320, AT4G26080, AT1G74710, AT5G64220, AT3G26420, AT5G52370, AT2G46830, AT5G09410, AT1G17610, AT5G04280, AT1G20440, AT5G23070, AT1G01060, AT3G06510, AT4G34710, AT2G42540, AT5G06760, AT4G12480, AT4G01370, AT4G25470, AT3G05880, AT4G19330, AT3G22690, AT3G20930, AT3G55990 | 142 | 299 | 18499 | 41.82731 | 2.95E-138 | 2.95E-138 | 1.12E-137 |
| heat | GO:0043248~proteasome assembly                       | 3  | 2.94  | 3.38E-03  | AT4G29040, AT1G64520, AT4G38630                                                                                                                                                                                                                                                                                                                                                                                                                                                                                                                                                                                                                                                                                                                                                                                                                                                                                                                                                                                                                                                                | 96  | 17  | 18499 | 34.00551 | 6.87E-01  | 4.37E-02  | 4.51E+00  |
| heat | GO:0072593~reactive oxygen species metabolic process | 3  | 2.94  | 2.99E-03  | AT4G04950, AT1G79440, AT5G47910                                                                                                                                                                                                                                                                                                                                                                                                                                                                                                                                                                                                                                                                                                                                                                                                                                                                                                                                                                                                                                                                | 96  | 16  | 18499 | 36.13086 | 6.43E-01  | 4.03E-02  | 4.00E+00  |
| heat | GO:0009688~abscisic acid biosynthetic process        | 3  | 2.94  | 2.62E-03  | AT1G16540, AT5G67030, AT1G52340                                                                                                                                                                                                                                                                                                                                                                                                                                                                                                                                                                                                                                                                                                                                                                                                                                                                                                                                                                                                                                                                | 96  | 15  | 18499 | 38.53958 | 5.95E-01  | 3.85E-02  | 3.52E+00  |
| heat | GO:0050832~defense response to fungus                | 9  | 8.82  | 2.67E-03  | AT4G11260, AT2G26330, AT4G23100, AT5G42980, AT5G47910, AT2G38470, AT5G03280, AT1G64280, AT5G02500                                                                                                                                                                                                                                                                                                                                                                                                                                                                                                                                                                                                                                                                                                                                                                                                                                                                                                                                                                                              | 96  | 464 | 18499 | 3.737675 | 6.01E-01  | 3.76E-02  | 3.58E+00  |
| heat | GO:0009873~ethylene-activated signaling pathway      | 6  | 5.88  | 2.30E-03  | AT1G66340, AT2G20880, AT1G54490, AT5G03280, AT1G05850, AT3G16770                                                                                                                                                                                                                                                                                                                                                                                                                                                                                                                                                                                                                                                                                                                                                                                                                                                                                                                                                                                                                               | 96  | 179 | 18499 | 6.459148 | 5.48E-01  | 3.54E-02  | 3.10E+00  |
| heat | GO:0008219~cell death                                | 4  | 3.92  | 1.49E-03  | AT5G43940, AT5G03280, AT1G64280, AT3G16770                                                                                                                                                                                                                                                                                                                                                                                                                                                                                                                                                                                                                                                                                                                                                                                                                                                                                                                                                                                                                                                     | 96  | 44  | 18499 | 17.51799 | 4.02E-01  | 2.42E-02  | 2.02E+00  |
| heat | GO:0061077~chaperone-mediated protein folding        | 4  | 3.92  | 5.84E-04  | AT3G53990, AT3G25230, AT5G48570, AT2G42540                                                                                                                                                                                                                                                                                                                                                                                                                                                                                                                                                                                                                                                                                                                                                                                                                                                                                                                                                                                                                                                     | 96  | 32  | 18499 | 24.08724 | 1.82E-01  | 1.00E-02  | 7.94E-01  |

|       |                                                                |    |       |           |                                                                                                                                                                                                                                                                                                                                                                                                                                                                                                                                                                                                                                                                                                                                           |     |     |       |          |           |           |           |
|-------|----------------------------------------------------------------|----|-------|-----------|-------------------------------------------------------------------------------------------------------------------------------------------------------------------------------------------------------------------------------------------------------------------------------------------------------------------------------------------------------------------------------------------------------------------------------------------------------------------------------------------------------------------------------------------------------------------------------------------------------------------------------------------------------------------------------------------------------------------------------------------|-----|-----|-------|----------|-----------|-----------|-----------|
| heat  | GO:0051259~protein oligomerization                             | 3  | 2.94  | 3.86E-04  | AT3G17880, AT5G42980, AT2G42540                                                                                                                                                                                                                                                                                                                                                                                                                                                                                                                                                                                                                                                                                                           | 96  | 6   | 18499 | 96.34896 | 1.24E-01  | 6.97E-03  | 5.26E-01  |
| heat  | GO:0001944~vasculature development                             | 4  | 3.92  | 3.13E-04  | AT1G66340, AT2G26330, AT1G54490, AT5G03280                                                                                                                                                                                                                                                                                                                                                                                                                                                                                                                                                                                                                                                                                                | 96  | 26  | 18499 | 29.64583 | 1.02E-01  | 5.97E-03  | 4.26E-01  |
| heat  | GO:0050826~response to freezing                                | 4  | 3.92  | 1.63E-04  | AT5G60410, AT5G58070, AT1G12610, AT2G42540                                                                                                                                                                                                                                                                                                                                                                                                                                                                                                                                                                                                                                                                                                | 96  | 21  | 18499 | 36.70437 | 5.46E-02  | 3.30E-03  | 2.22E-01  |
| heat  | GO:0042742~defense response to bacterium                       | 9  | 8.82  | 8.79E-05  | AT1G66340, AT1G16540, AT2G26330, AT4G23100, AT4G26850, AT2G39770, AT2G38470, AT5G03280, AT5G02500                                                                                                                                                                                                                                                                                                                                                                                                                                                                                                                                                                                                                                         | 96  | 276 | 18499 | 6.283628 | 2.98E-02  | 1.89E-03  | 1.20E-01  |
| heat  | GO:0051788~response to misfolded protein                       | 3  | 2.94  | 7.80E-05  | AT4G29040, AT1G64520, AT4G38630                                                                                                                                                                                                                                                                                                                                                                                                                                                                                                                                                                                                                                                                                                           | 96  | 3   | 18499 | 192.6979 | 2.65E-02  | 1.79E-03  | 1.06E-01  |
| heat  | GO:0052544~defense response by callose deposition in cell wall | 4  | 3.92  | 7.00E-05  | AT1G66340, AT4G23100, AT4G26850, AT5G03280                                                                                                                                                                                                                                                                                                                                                                                                                                                                                                                                                                                                                                                                                                | 96  | 16  | 18499 | 48.17448 | 2.38E-02  | 1.72E-03  | 9.54E-02  |
| heat  | GO:0006402~mRNA catabolic process                              | 4  | 3.92  | 7.00E-05  | AT5G21160, AT5G61780, AT1G54490, AT5G07350                                                                                                                                                                                                                                                                                                                                                                                                                                                                                                                                                                                                                                                                                                | 96  | 16  | 18499 | 48.17448 | 2.38E-02  | 1.72E-03  | 9.54E-02  |
| heat  | GO:0010182~sugar mediated signaling pathway                    | 5  | 4.90  | 1.61E-05  | AT1G66340, AT1G16540, AT5G67030, AT5G03280, AT1G52340                                                                                                                                                                                                                                                                                                                                                                                                                                                                                                                                                                                                                                                                                     | 96  | 30  | 18499 | 32.11632 | 5.54E-03  | 4.27E-04  | 2.20E-02  |
| heat  | GO:0042542~response to hydrogen peroxide                       | 6  | 5.88  | 8.32E-06  | AT2G26150, AT4G27670, AT5G42980, AT1G74310, AT5G05410, AT4G12400                                                                                                                                                                                                                                                                                                                                                                                                                                                                                                                                                                                                                                                                          | 96  | 54  | 18499 | 21.41088 | 2.86E-03  | 2.39E-04  | 1.14E-02  |
| heat  | GO:0009735~response to cytokinin                               | 9  | 8.82  | 4.59E-06  | AT5G42020, AT5G53400, AT5G42980, AT5G58070, AT1G64520, AT4G38630, AT3G25230, AT1G05850, AT3G16770                                                                                                                                                                                                                                                                                                                                                                                                                                                                                                                                                                                                                                         | 96  | 183 | 18499 | 9.476947 | 1.58E-03  | 1.44E-04  | 6.27E-03  |
| heat  | GO:0009409~response to cold                                    | 12 | 11.76 | 3.83E-07  | AT5G59820, AT1G16540, AT3G53110, AT3G53990, AT5G58070, AT2G30250, AT4G26080, AT2G38470, AT1G21760, AT2G03440, AT2G42540, AT5G02500                                                                                                                                                                                                                                                                                                                                                                                                                                                                                                                                                                                                        | 96  | 299 | 18499 | 7.733696 | 1.32E-04  | 1.32E-05  | 5.23E-04  |
| heat  | GO:0006457~protein folding                                     | 12 | 11.76 | 2.64E-07  | AT5G56010, AT5G42020, AT4G26780, AT5G53400, AT5G62390, AT3G17880, AT1G09080, AT5G42980, AT3G08970, AT3G25230, AT1G56260, AT5G02500                                                                                                                                                                                                                                                                                                                                                                                                                                                                                                                                                                                                        | 96  | 288 | 18499 | 8.02908  | 9.07E-05  | 1.01E-05  | 3.60E-04  |
| heat  | GO:0009651~response to salt stress                             | 16 | 15.69 | 2.40E-08  | AT1G16540, AT2G20880, AT1G12610, AT2G30250, AT3G06010, AT2G03440, AT5G03280, AT2G42540, AT3G09350, AT1G66340, AT5G61780, AT2G39770, AT2G38470, AT5G07350, AT4G38630, AT1G05850                                                                                                                                                                                                                                                                                                                                                                                                                                                                                                                                                            | 96  | 484 | 18499 | 6.370179 | 8.27E-06  | 1.03E-06  | 3.28E-05  |
| heat  | GO:0009644~response to high light intensity                    | 8  | 7.84  | 1.25E-08  | AT2G26150, AT4G27670, AT5G58070, AT1G74310, AT3G47860, AT5G53170, AT2G42540, AT4G12400                                                                                                                                                                                                                                                                                                                                                                                                                                                                                                                                                                                                                                                    | 96  | 55  | 18499 | 28.02879 | 4.30E-06  | 7.16E-07  | 1.70E-05  |
| heat  | GO:0006970~response to osmotic stress                          | 10 | 9.80  | 1.28E-08  | AT5G57050, AT1G16540, AT1G50500, AT2G30250, AT5G67030, AT2G38470, AT5G53060, AT5G03280, AT3G25230, AT2G42540                                                                                                                                                                                                                                                                                                                                                                                                                                                                                                                                                                                                                              | 96  | 122 | 18499 | 15.79491 | 4.40E-06  | 6.28E-07  | 1.74E-05  |
| heat  | GO:0009414~response to water deprivation                       | 14 | 13.73 | 1.83E-09  | AT1G12610, AT3G06010, AT1G28520, AT2G42540, AT5G57050, AT5G60410, AT5G44650, AT5G58070, AT5G67030, AT3G47860, AT2G38470, AT1G05850, AT5G05410, AT1G52340                                                                                                                                                                                                                                                                                                                                                                                                                                                                                                                                                                                  | 96  | 279 | 18499 | 9.66943  | 6.30E-07  | 1.26E-07  | 2.50E-06  |
| heat  | GO:0034605~cellular response to heat                           | 10 | 9.80  | 4.86E-15  | AT2G26150, AT5G62390, AT2G30250, AT4G19020, AT5G61780, AT3G08970, AT2G38470, AT5G07350, AT5G27660, AT5G07100                                                                                                                                                                                                                                                                                                                                                                                                                                                                                                                                                                                                                              | 96  | 26  | 18499 | 74.11458 | 1.68E-12  | 4.20E-13  | 6.66E-12  |
| heat  | GO:0070370~cellular heat acclimation                           | 10 | 9.80  | 1.68E-20  | AT5G21160, AT2G26330, AT2G30250, AT2G38470, AT4G15802, AT2G21320, AT1G54490, AT3G25230, AT5G48570, AT5G07100                                                                                                                                                                                                                                                                                                                                                                                                                                                                                                                                                                                                                              | 96  | 10  | 18499 | 192.6979 | 5.77E-18  | 1.92E-18  | 2.29E-17  |
| heat  | GO:0010286~heat acclimation                                    | 24 | 23.53 | 1.79E-44  | AT4G26840, AT3G02885, AT5G43940, AT1G54490, AT1G79350, AT2G42540, AT4G12400, AT5G21160, AT2G26150, AT4G26780, AT5G60410, AT1G50500, AT5G53400, AT3G17880, AT5G44650, AT4G21320, AT5G58070, AT5G42980, AT3G47220, AT5G53060, AT5G05410, AT5G10010, AT2G41140, AT3G16770                                                                                                                                                                                                                                                                                                                                                                                                                                                                    | 96  | 38  | 18499 | 121.7039 | 6.16E-42  | 3.08E-42  | 2.44E-41  |
| heat  | GO:0009408~response to heat                                    | 65 | 63.73 | 3.57E-114 | AT4G27670, AT4G11260, AT4G29770, AT5G47910, AT4G26850, AT5G63870, AT1G64280, AT4G04950, AT3G09350, AT1G66340, AT1G03190, AT3G10140, AT3G53990, AT5G42980, AT3G08970, AT1G09090, AT5G16820, AT1G16540, AT3G02885, AT1G12610, AT4G26780, AT5G57050, AT1G79440, AT1G50500, AT4G21320, AT5G58070, AT1G08550, AT4G15802, AT1G21760, AT4G38630, AT5G05410, AT1G71790, AT1G52340, AT5G59820, AT3G24320, AT3G53110, AT3G28030, AT1G64520, AT2G03440, AT1G28520, AT3G25230, AT5G03280, AT4G12400, AT2G26150, AT4G29040, AT4G26080, AT3G47860, AT2G38470, AT1G05850, AT5G53170, AT5G02500, AT5G56010, AT4G26840, AT5G17020, AT3G06010, AT5G42020, AT4G23100, AT5G53400, AT1G09080, AT1G74310, AT5G05630, AT5G67030, AT2G39770, AT3G10800, AT1G56260 | 96  | 160 | 18499 | 78.28353 | 1.23E-111 | 1.23E-111 | 4.87E-111 |
| light | GO:0046777~protein autophosphorylation                         | 6  | 4.23  | 3.56E-03  | AT1G10470, AT4G08920, AT3G45780, AT4G28860, AT5G58140, AT1G04400                                                                                                                                                                                                                                                                                                                                                                                                                                                                                                                                                                                                                                                                          | 140 | 135 | 18499 | 5.872698 | 7.70E-01  | 2.96E-02  | 4.88E+00  |
| light | GO:0010029~regulation of seed germination                      | 4  | 2.82  | 3.35E-03  | AT2G37678, AT2G20180, AT1G42550, AT2G18790                                                                                                                                                                                                                                                                                                                                                                                                                                                                                                                                                                                                                                                                                                | 140 | 40  | 18499 | 13.21357 | 7.49E-01  | 2.84E-02  | 4.59E+00  |
| light | GO:0010099~regulation of photomorphogenesis                    | 3  | 2.11  | 2.95E-03  | AT2G21150, AT2G20180, AT2G24790                                                                                                                                                                                                                                                                                                                                                                                                                                                                                                                                                                                                                                                                                                           | 140 | 11  | 18499 | 36.03701 | 7.04E-01  | 2.56E-02  | 4.05E+00  |
| light | GO:0010100~negative regulation of photomorphogenesis           | 3  | 2.11  | 2.95E-03  | AT2G20180, AT2G21320, AT2G46340                                                                                                                                                                                                                                                                                                                                                                                                                                                                                                                                                                                                                                                                                                           | 140 | 11  | 18499 | 36.03701 | 7.04E-01  | 2.56E-02  | 4.05E+00  |
| light | GO:0009658~chloroplast organization                            | 6  | 4.23  | 2.54E-03  | AT5G24120, AT3G47390, AT4G22260, AT1G08540, AT2G46340, AT5G55280                                                                                                                                                                                                                                                                                                                                                                                                                                                                                                                                                                                                                                                                          | 140 | 125 | 18499 | 6.342514 | 6.50E-01  | 2.25E-02  | 3.50E+00  |

|       |                                                                |    |       |          |                                                                                                                                                                                                                                                                                                                                                                                                                                                        |     |      |       |          |          |          |          |
|-------|----------------------------------------------------------------|----|-------|----------|--------------------------------------------------------------------------------------------------------------------------------------------------------------------------------------------------------------------------------------------------------------------------------------------------------------------------------------------------------------------------------------------------------------------------------------------------------|-----|------|-------|----------|----------|----------|----------|
| light | GO:0009909~regulation of flower development                    | 5  | 3.52  | 2.34E-03 | AT3G21150, AT2G24790, AT1G25540, AT1G04400, AT2G40080                                                                                                                                                                                                                                                                                                                                                                                                  | 140 | 74   | 18499 | 8.928089 | 6.19E-01 | 2.12E-02 | 3.23E+00 |
| light | GO:0009740~gibberellic acid mediated signaling pathway         | 5  | 3.52  | 2.22E-03 | AT5G39760, AT2G26300, AT2G20180, AT1G48270, AT1G09530                                                                                                                                                                                                                                                                                                                                                                                                  | 140 | 73   | 18499 | 9.050391 | 6.01E-01 | 2.06E-02 | 3.07E+00 |
| light | GO:0009408~response to heat                                    | 7  | 4.93  | 1.32E-03 | AT5G59820, AT4G27670, AT1G79440, AT5G58070, AT3G47860, AT5G58140, AT5G63870                                                                                                                                                                                                                                                                                                                                                                            | 140 | 160  | 18499 | 5.780938 | 4.21E-01 | 1.26E-02 | 1.84E+00 |
| light | GO:0009902~chloroplast relocation                              | 3  | 2.11  | 8.24E-04 | AT1G42550, AT5G58140, AT5G55280                                                                                                                                                                                                                                                                                                                                                                                                                        | 140 | 6    | 18499 | 66.06786 | 2.88E-01 | 8.06E-03 | 1.15E+00 |
| light | GO:000160~phosphorelay signal transduction system              | 5  | 3.52  | 5.80E-04 | AT1G10470, AT3G45780, AT3G48100, AT1G59940, AT5G58140                                                                                                                                                                                                                                                                                                                                                                                                  | 140 | 51   | 18499 | 12.95448 | 2.13E-01 | 5.81E-03 | 8.10E-01 |
| light | GO:0017006~protein-tetrapyrrole linkage                        | 3  | 2.11  | 5.52E-04 | AT4G16250, AT2G18790, AT1G09570                                                                                                                                                                                                                                                                                                                                                                                                                        | 140 | 5    | 18499 | 79.28143 | 2.04E-01 | 5.67E-03 | 7.71E-01 |
| light | GO:0009584~detection of visible light                          | 3  | 2.11  | 5.52E-04 | AT4G16250, AT2G18790, AT1G09570                                                                                                                                                                                                                                                                                                                                                                                                                        | 140 | 5    | 18499 | 79.28143 | 2.04E-01 | 5.67E-03 | 7.71E-01 |
| light | GO:0050826~response to freezing                                | 4  | 2.82  | 5.00E-04 | AT5G63980, AT1G31812, AT5G58070, AT5G58140                                                                                                                                                                                                                                                                                                                                                                                                             | 140 | 21   | 18499 | 25.16871 | 1.86E-01 | 5.27E-03 | 6.98E-01 |
| light | GO:0009904~chloroplast accumulation movement                   | 4  | 2.82  | 4.31E-04 | AT3G45780, AT5G38150, AT1G75100, AT1G66840                                                                                                                                                                                                                                                                                                                                                                                                             | 140 | 20   | 18499 | 26.42714 | 1.63E-01 | 4.79E-03 | 6.02E-01 |
| light | GO:2000028~regulation of photoperiodism, flowering             | 4  | 2.82  | 4.31E-04 | AT1G22770, AT2G46340, AT2G18790, AT1G04400                                                                                                                                                                                                                                                                                                                                                                                                             | 140 | 20   | 18499 | 26.42714 | 1.63E-01 | 4.79E-03 | 6.02E-01 |
| light | GO:0009409~response to cold                                    | 10 | 7.04  | 4.37E-04 | AT1G22770, AT5G63980, AT5G59820, AT1G31812, AT2G46590, AT4G36930, AT5G58070, AT3G22690, AT2G18790, AT2G36530                                                                                                                                                                                                                                                                                                                                           | 140 | 299  | 18499 | 4.419255 | 1.65E-01 | 4.73E-03 | 6.10E-01 |
| light | GO:1901562~response to paraquat                                | 3  | 2.11  | 3.33E-04 | AT5G58070, AT3G47860, AT5G58140                                                                                                                                                                                                                                                                                                                                                                                                                        | 140 | 4    | 18499 | 99.10179 | 1.28E-01 | 3.80E-03 | 4.65E-01 |
| light | GO:0010617~circadian regulation of calcium ion oscillation     | 3  | 2.11  | 1.67E-04 | AT4G08920, AT2G18790, AT1G04400                                                                                                                                                                                                                                                                                                                                                                                                                        | 140 | 3    | 18499 | 132.1357 | 6.66E-02 | 1.97E-03 | 2.34E-01 |
| light | GO:2000030~regulation of response to red or far red light      | 3  | 2.11  | 1.67E-04 | AT2G46370, AT1G78370, AT4G04770                                                                                                                                                                                                                                                                                                                                                                                                                        | 140 | 3    | 18499 | 132.1357 | 6.66E-02 | 1.97E-03 | 2.34E-01 |
| light | GO:0071482~cellular response to light stimulus                 | 4  | 2.82  | 1.42E-04 | AT3G08550, AT1G08540, AT2G30170, AT2G36990                                                                                                                                                                                                                                                                                                                                                                                                             | 140 | 14   | 18499 | 37.75306 | 5.69E-02 | 1.77E-03 | 1.99E-01 |
| light | GO:0009908~flower development                                  | 9  | 6.34  | 1.46E-04 | AT1G22770, AT1G68050, AT5G57360, AT4G36930, AT1G48270, AT3G54610, AT1G25540, AT4G34530, AT2G40080                                                                                                                                                                                                                                                                                                                                                      | 140 | 202  | 18499 | 5.887235 | 5.84E-02 | 1.77E-03 | 2.04E-01 |
| light | GO:0009735~response to cytokinin                               | 9  | 6.34  | 7.36E-05 | AT1G10470, AT3G62030, AT4G38740, AT5G58070, AT3G48100, AT1G59940, AT1G48270, AT1G78370, AT5G58140                                                                                                                                                                                                                                                                                                                                                      | 140 | 183  | 18499 | 6.498478 | 2.99E-02 | 9.47E-04 | 1.03E-01 |
| light | GO:0009704~de-etiolation                                       | 4  | 2.82  | 6.55E-05 | AT4G38740, AT5G61270, AT2G43010, AT1G09530                                                                                                                                                                                                                                                                                                                                                                                                             | 140 | 11   | 18499 | 48.04935 | 2.66E-02 | 8.71E-04 | 9.18E-02 |
| light | GO:0010118~stomatal movement                                   | 5  | 3.52  | 6.27E-05 | AT4G18290, AT4G08920, AT5G58140, AT1G04400, AT2G17260                                                                                                                                                                                                                                                                                                                                                                                                  | 140 | 29   | 18499 | 22.78202 | 2.55E-02 | 8.60E-04 | 8.77E-02 |
| light | GO:0009903~chloroplast avoidance movement                      | 5  | 3.52  | 2.89E-05 | AT3G45780, AT1G42550, AT5G38150, AT1G75100, AT1G66840                                                                                                                                                                                                                                                                                                                                                                                                  | 140 | 24   | 18499 | 27.52827 | 1.18E-02 | 4.10E-04 | 4.04E-02 |
| light | GO:0010119~regulation of stomatal movement                     | 6  | 4.23  | 2.14E-05 | AT2G46370, AT1G20090, AT2G26300, AT3G45780, AT5G27620, AT4G40100                                                                                                                                                                                                                                                                                                                                                                                       | 140 | 45   | 18499 | 17.6181  | 8.77E-03 | 3.15E-04 | 2.99E-02 |
| light | GO:0009911~positive regulation of flower development           | 6  | 4.23  | 1.04E-05 | AT1G68050, AT1G26260, AT1G26830, AT1G25540, AT4G34530, AT1G04400                                                                                                                                                                                                                                                                                                                                                                                       | 140 | 39   | 18499 | 20.32857 | 4.29E-03 | 1.59E-04 | 1.46E-02 |
| light | GO:0071483~cellular response to blue light                     | 4  | 2.82  | 8.17E-06 | AT5G24120, AT2G21320, AT1G75100, AT2G36990                                                                                                                                                                                                                                                                                                                                                                                                             | 140 | 6    | 18499 | 88.09048 | 3.36E-03 | 1.29E-04 | 1.14E-02 |
| light | GO:0009738~abscisic acid-activated signaling pathway           | 11 | 7.75  | 2.21E-06 | AT5G63980, AT3G08550, AT1G21970, AT2G26300, AT1G70800, AT1G02340, AT1G42550, AT3G04110, AT3G59220, AT1G48270, AT1G54160                                                                                                                                                                                                                                                                                                                                | 140 | 195  | 18499 | 7.45381  | 9.08E-04 | 3.64E-05 | 3.09E-03 |
| light | GO:0009646~response to absence of light                        | 6  | 4.23  | 1.29E-06 | AT2G37678, AT1G31812, AT4G08920, AT3G47340, AT5G43470, AT1G04400                                                                                                                                                                                                                                                                                                                                                                                       | 140 | 26   | 18499 | 30.49286 | 5.32E-04 | 2.31E-05 | 1.81E-03 |
| light | GO:0009414~response to water deprivation                       | 13 | 9.15  | 1.33E-06 | AT4G08920, AT1G11755, AT5G27620, AT2G42620, AT5G63980, AT5G58070, AT3G47860, AT2G05620, AT5G58140, AT5G07690, AT1G54160, AT1G04400, AT5G49230                                                                                                                                                                                                                                                                                                          | 140 | 279  | 18499 | 6.156861 | 5.48E-04 | 2.28E-05 | 1.86E-03 |
| light | GO:0045893~positive regulation of transcription, DNA-templated | 12 | 8.45  | 7.55E-07 | AT5G24120, AT2G37678, AT1G21970, AT4G27430, AT5G20730, AT3G54610, AT4G40060, AT2G36990, AT1G25540, AT4G15090, AT5G02200, AT4G25560                                                                                                                                                                                                                                                                                                                     | 140 | 217  | 18499 | 7.307044 | 3.11E-04 | 1.41E-05 | 1.06E-03 |
| light | GO:0009630~gravitropism                                        | 7  | 4.93  | 3.10E-07 | AT1G70800, AT5G20730, AT1G05630, AT1G70940, AT2G18790, AT1G09570, AT2G21650                                                                                                                                                                                                                                                                                                                                                                            | 140 | 37   | 18499 | 24.99865 | 1.28E-04 | 6.08E-06 | 4.34E-04 |
| light | GO:0040008~regulation of growth                                | 10 | 7.04  | 6.84E-08 | AT1G26945, AT1G26260, AT3G08550, AT4G31500, AT5G20730, AT1G10120, AT1G17060, AT2G26710, AT1G78370, AT4G28556                                                                                                                                                                                                                                                                                                                                           | 140 | 101  | 18499 | 13.08274 | 2.82E-05 | 1.41E-06 | 9.58E-05 |
| light | GO:0042752~regulation of circadian rhythm                      | 7  | 4.93  | 1.94E-08 | AT2G21150, AT1G22770, AT1G10470, AT5G57360, AT4G08920, AT1G59940, AT1G04400                                                                                                                                                                                                                                                                                                                                                                            | 140 | 24   | 18499 | 38.53958 | 8.01E-06 | 4.22E-07 | 2.72E-05 |
| light | GO:0006351~transcription, DNA-templated                        | 40 | 28.17 | 2.66E-09 | AT1G26945, AT5G59820, AT1G26260, AT1G21970, AT2G20180, AT4G16250, AT3G21150, AT2G36890, AT5G27620, AT1G10120, AT2G43010, AT2G21320, AT4G01120, AT1G09570, AT2G21650, AT3G61850, AT4G36930, AT5G48560, AT1G59940, AT4G40060, AT3G54610, AT5G07690, AT2G18790, AT2G37678, AT2G46590, AT1G02340, AT1G09530, AT1G25540, AT5G02200, AT4G34530, AT2G36530, AT4G25560, AT1G10470, AT5G39760, AT5G61270, AT5G20730, AT3G48100, AT4G28610, AT4G17490, AT1G54160 | 140 | 1886 | 18499 | 2.802454 | 1.10E-06 | 6.09E-08 | 3.73E-06 |
| light | GO:0006355~regulation of transcription, DNA-templated          | 44 | 30.99 | 5.34E-10 | AT5G59820, AT1G26945, AT1G26260, AT2G20180, AT4G16250, AT3G21150, AT2G36890, AT5G43630, AT5G27620, AT1G10120, AT2G43010, AT2G21320, AT2G36990, AT4G01120, AT3G02790, AT1G09570, AT2G21650, AT1G22770,                                                                                                                                                                                                                                                  | 140 | 2119 | 18499 | 2.743734 | 2.20E-07 | 1.29E-08 | 7.48E-07 |

|         |                                                                                   |    |       |          |                                                                                                                                                                                                                                                                                                                                                                                                                                  |     |     |       |          |          |          |          |
|---------|-----------------------------------------------------------------------------------|----|-------|----------|----------------------------------------------------------------------------------------------------------------------------------------------------------------------------------------------------------------------------------------------------------------------------------------------------------------------------------------------------------------------------------------------------------------------------------|-----|-----|-------|----------|----------|----------|----------|
|         |                                                                                   |    |       |          | AT5G24120, AT1G68050, AT3G61850, AT4G36930, AT5G48560, AT1G59940, AT4G40060, AT1G10170, AT5G07690, AT2G18790, AT2G46590, AT1G02340, AT1G08540, AT1G09530, AT4G34530, AT2G36530, AT4G25560, AT1G10470, AT5G39760, AT5G28490, AT5G61270, AT5G20730, AT3G48100, AT4G28610, AT4G17490, AT1G54160                                                                                                                                     |     |     |       |          |          |          |          |
| light   | GO:0010017~red or far-red light signaling pathway                                 | 8  | 5.63  | 4.99E-10 | AT1G10470, AT3G21150, AT4G16250, AT2G43010, AT1G09530, AT4G15090, AT2G46340, AT2G40080                                                                                                                                                                                                                                                                                                                                           | 140 | 25  | 18499 | 42.28343 | 2.05E-07 | 1.28E-08 | 6.99E-07 |
| light   | GO:0009639~response to red or far red light                                       | 9  | 6.34  | 2.10E-10 | AT2G36910, AT2G37678, AT3G61850, AT5G58960, AT1G09530, AT1G26830, AT3G28860, AT4G15090, AT4G25560                                                                                                                                                                                                                                                                                                                                | 140 | 36  | 18499 | 33.03393 | 8.66E-08 | 5.77E-09 | 2.94E-07 |
| light   | GO:0009642~response to light intensity                                            | 7  | 4.93  | 7.23E-11 | AT1G10522, AT5G16400, AT3G62030, AT4G37270, AT1G02340, AT1G10170, AT3G02730                                                                                                                                                                                                                                                                                                                                                      | 140 | 11  | 18499 | 84.08636 | 2.98E-08 | 2.13E-09 | 1.01E-07 |
| light   | GO:0010244~response to low fluence blue light stimulus by blue low-fluence system | 7  | 4.93  | 1.33E-11 | AT4G08920, AT2G26300, AT3G59220, AT2G43010, AT1G48270, AT2G18790, AT1G04400                                                                                                                                                                                                                                                                                                                                                      | 140 | 9   | 18499 | 102.7722 | 5.49E-09 | 4.22E-10 | 1.86E-08 |
| light   | GO:0007623~circadian rhythm                                                       | 13 | 9.15  | 8.28E-12 | AT4G18290, AT5G57360, AT4G08920, AT1G10470, AT1G22770, AT1G68050, AT3G45780, AT4G36930, AT3G48100, AT1G59940, AT4G28610, AT5G58140, AT1G04400                                                                                                                                                                                                                                                                                    | 140 | 97  | 18499 | 17.70891 | 3.41E-09 | 2.84E-10 | 1.16E-08 |
| light   | GO:0009644~response to high light intensity                                       | 12 | 8.45  | 2.60E-13 | AT4G18290, AT4G27670, AT3G47390, AT4G08920, AT4G22260, AT5G58070, AT3G47860, AT2G05620, AT1G07350, AT4G17490, AT5G58140, AT2G42080                                                                                                                                                                                                                                                                                               | 140 | 55  | 18499 | 28.82961 | 1.07E-10 | 9.76E-12 | 3.65E-10 |
| light   | GO:0009638~phototropism                                                           | 9  | 6.34  | 1.90E-13 | AT5G64330, AT4G08920, AT3G45780, AT1G70800, AT5G20730, AT5G58140, AT2G18790, AT1G09570, AT1G04400                                                                                                                                                                                                                                                                                                                                | 140 | 17  | 18499 | 69.9542  | 7.84E-11 | 8.71E-12 | 2.67E-10 |
| light   | GO:0009640~photomorphogenesis                                                     | 12 | 8.45  | 2.10E-13 | AT2G46370, AT4G28880, AT2G36910, AT2G37678, AT4G08920, AT3G21150, AT4G28860, AT4G14110, AT3G28860, AT2G46340, AT2G18790, AT1G09570                                                                                                                                                                                                                                                                                               | 140 | 54  | 18499 | 29.36349 | 8.64E-11 | 8.64E-12 | 2.94E-10 |
| light   | GO:0010161~red light signaling pathway                                            | 8  | 5.63  | 4.13E-14 | AT2G39840, AT2G20180, AT2G24790, AT2G43010, AT1G59940, AT2G18790, AT1G09570, AT5G49230                                                                                                                                                                                                                                                                                                                                           | 140 | 9   | 18499 | 117.454  | 1.70E-11 | 2.13E-12 | 5.79E-11 |
| light   | GO:0018298~protein-chromophore linkage                                            | 12 | 8.45  | 2.35E-14 | AT1G68050, AT2G05100, AT5G57360, AT4G08920, AT3G45780, AT2G05070, AT4G16250, AT3G27690, AT5G58140, AT2G18790, AT1G09570, AT1G04400                                                                                                                                                                                                                                                                                               | 140 | 45  | 18499 | 35.23619 | 9.70E-12 | 1.39E-12 | 3.30E-11 |
| light   | GO:0010218~response to far red light                                              | 15 | 10.56 | 4.97E-19 | AT2G37678, AT4G08920, AT1G02340, AT3G27690, AT1G25540, AT5G02200, AT1G09570, AT5G24120, AT1G22770, AT2G05100, AT5G28490, AT3G28860, AT2G46340, AT4G15090, AT2G18790                                                                                                                                                                                                                                                              | 140 | 49  | 18499 | 40.44971 | 2.05E-16 | 3.41E-17 | 6.96E-16 |
| light   | GO:0009585~red, far-red light phototransduction                                   | 17 | 11.97 | 8.51E-21 | AT1G53090, AT1G02340, AT4G16250, AT2G43010, AT1G09530, AT4G14110, AT1G25540, AT1G09570, AT4G25560, AT2G46370, AT1G22770, AT4G38740, AT5G61270, AT2G46340, AT4G15090, AT2G18790, AT2G40080                                                                                                                                                                                                                                        | 140 | 62  | 18499 | 36.23076 | 3.51E-18 | 7.02E-19 | 1.19E-17 |
| light   | GO:0010114~response to red light                                                  | 21 | 14.79 | 1.14E-28 | AT2G21150, AT2G37678, AT3G61600, AT5G57360, AT4G08920, AT1G08540, AT3G27690, AT1G25540, AT2G21650, AT1G10470, AT5G24120, AT5G17880, AT2G05100, AT4G31500, AT5G28490, AT4G36930, AT3G48100, AT1G59940, AT2G46260, AT2G46340, AT2G40080                                                                                                                                                                                            | 140 | 58  | 18499 | 47.84224 | 4.71E-26 | 1.18E-26 | 1.60E-25 |
| light   | GO:0009785~blue light signaling pathway                                           | 18 | 12.68 | 5.04E-36 | AT4G28880, AT1G21970, AT4G08920, AT3G21150, AT1G02340, AT2G36890, AT4G28860, AT1G48270, AT5G63870, AT5G64330, AT3G45780, AT2G26300, AT4G38740, AT5G20730, AT3G59220, AT1G54160, AT1G04400, AT5G49230                                                                                                                                                                                                                             | 140 | 18  | 18499 | 132.1357 | 2.08E-33 | 6.92E-34 | 7.06E-33 |
| light   | GO:0009416~response to light stimulus                                             | 38 | 26.76 | 1.33E-42 | AT1G26945, AT5G59820, AT4G08920, AT1G55480, AT1G17060, AT4G14110, AT2G42620, AT5G63980, AT1G20090, AT3G05420, AT4G27430, AT4G38740, AT2G05070, AT1G42550, AT3G04110, AT2G26710, AT1G77760, AT3G54610, AT1G37130, AT4G28556, AT2G38050, AT1G04400, AT2G17260, AT2G37678, AT3G08550, AT2G46590, AT5G27630, AT1G70940, AT2G36530, AT5G64330, AT3G19820, AT5G17880, AT1G79440, AT5G28490, AT5G61270, AT5G58070, AT5G08560, AT5G43470 | 140 | 188 | 18499 | 26.70828 | 5.46E-40 | 2.73E-40 | 1.86E-39 |
| light   | GO:0009637~response to blue light                                                 | 34 | 23.94 | 9.03E-59 | AT2G21150, AT4G28880, AT1G26260, AT4G08920, AT4G28860, AT3G27690, AT1G10120, AT5G27620, AT1G05630, AT5G55280, AT4G01120, AT5G24120, AT1G22770, AT1G68050, AT2G36910, AT3G45780, AT1G42550, AT5G48560, AT4G40060, AT5G58140, AT2G46340, AT1G66840, AT1G04400, AT1G53090, AT1G70800, AT1G08540, AT4G40100, AT5G02200, AT4G34530, AT2G05100, AT5G28490, AT5G38150, AT3G28860, AT5G43470                                             | 140 | 52  | 18499 | 86.39643 | 3.72E-56 | 3.72E-56 | 1.26E-55 |
| osmotic | GO:0009688~abscisic acid biosynthetic process                                     | 3  | 2.63  | 3.62E-03 | AT1G16540, AT5G67030, AT3G14440                                                                                                                                                                                                                                                                                                                                                                                                  | 113 | 15  | 18499 | 32.74159 | 7.58E-01 | 4.78E-02 | 4.92E+00 |
| osmotic | GO:0010119~regulation of stomatal movement                                        | 4  | 3.51  | 2.55E-03 | AT2G40220, AT2G21660, AT4G33950, AT5G03280                                                                                                                                                                                                                                                                                                                                                                                       | 113 | 45  | 18499 | 14.55182 | 6.31E-01 | 3.50E-02 | 3.48E+00 |

|         |                                                                             |    |       |          |                                                                                                                                                                                                                                                                                                                                           |     |     |       |          |          |          |          |
|---------|-----------------------------------------------------------------------------|----|-------|----------|-------------------------------------------------------------------------------------------------------------------------------------------------------------------------------------------------------------------------------------------------------------------------------------------------------------------------------------------|-----|-----|-------|----------|----------|----------|----------|
| osmotic | GO:0048481~plant ovule development                                          | 4  | 3.51  | 2.55E-03 | AT3G45640, AT5G62090, AT2G43790, AT4G25520                                                                                                                                                                                                                                                                                                | 113 | 45  | 18499 | 14.55182 | 6.31E-01 | 3.50E-02 | 3.48E+00 |
| osmotic | GO:0009793~embryo development ending in seed dormancy                       | 10 | 8.77  | 1.90E-03 | AT1G32560, AT2G32700, AT2G35300, AT5G13170, AT5G45800, AT5G62090, AT4G25520, AT2G35510, AT5G06760, AT1G32230                                                                                                                                                                                                                              | 113 | 459 | 18499 | 3.566622 | 5.24E-01 | 2.71E-02 | 2.61E+00 |
| osmotic | GO:0010286~heat acclimation                                                 | 4  | 3.51  | 1.56E-03 | AT1G50500, AT1G20440, AT5G53060, AT2G42540                                                                                                                                                                                                                                                                                                | 113 | 38  | 18499 | 17.23242 | 4.57E-01 | 2.42E-02 | 2.15E+00 |
| osmotic | GO:0009787~regulation of abscisic acid-activated signaling pathway          | 3  | 2.63  | 1.58E-03 | AT4G16830, AT2G22660, AT1G42550                                                                                                                                                                                                                                                                                                           | 113 | 10  | 18499 | 49.11239 | 4.62E-01 | 2.36E-02 | 2.18E+00 |
| osmotic | GO:1902074~response to salt                                                 | 3  | 2.63  | 1.27E-03 | AT2G32700, AT5G52310, AT1G65690                                                                                                                                                                                                                                                                                                           | 113 | 9   | 18499 | 54.56932 | 3.92E-01 | 2.05E-02 | 1.75E+00 |
| osmotic | GO:1901001~negative regulation of response to salt stress                   | 3  | 2.63  | 9.93E-04 | AT2G32700, AT5G62090, AT4G25520                                                                                                                                                                                                                                                                                                           | 113 | 8   | 18499 | 61.39049 | 3.22E-01 | 1.68E-02 | 1.37E+00 |
| osmotic | GO:0048316~seed development                                                 | 5  | 4.39  | 7.70E-04 | AT1G32560, AT2G35300, AT2G40220, AT4G34710, AT5G06760                                                                                                                                                                                                                                                                                     | 113 | 68  | 18499 | 12.03735 | 2.60E-01 | 1.36E-02 | 1.06E+00 |
| osmotic | GO:0042542~response to hydrogen peroxide                                    | 5  | 4.39  | 3.19E-04 | AT5G12030, AT1G77120, AT2G47900, AT2G43790, AT1G32230                                                                                                                                                                                                                                                                                     | 113 | 54  | 18499 | 15.15814 | 1.17E-01 | 5.92E-03 | 4.42E-01 |
| osmotic | GO:0009790~embryo development                                               | 3  | 2.63  | 1.09E-04 | AT1G32560, AT2G35300, AT5G06760                                                                                                                                                                                                                                                                                                           | 113 | 3   | 18499 | 163.708  | 4.16E-02 | 2.12E-03 | 1.51E-01 |
| osmotic | GO:0009789~positive regulation of abscisic acid-activated signaling pathway | 5  | 4.39  | 5.13E-05 | AT1G53300, AT5G03280, AT3G50500, AT5G66880, AT1G15100                                                                                                                                                                                                                                                                                     | 113 | 34  | 18499 | 24.0747  | 1.99E-02 | 1.06E-03 | 7.13E-02 |
| osmotic | GO:0010182~sugar mediated signaling pathway                                 | 5  | 4.39  | 3.09E-05 | AT1G16540, AT2G40220, AT5G67030, AT5G03280, AT5G49450                                                                                                                                                                                                                                                                                     | 113 | 30  | 18499 | 27.28466 | 1.20E-02 | 6.71E-04 | 4.29E-02 |
| osmotic | GO:0010150~leaf senescence                                                  | 7  | 6.14  | 2.01E-05 | AT5G52310, AT5G13170, AT1G27320, AT2G43790, AT5G03280, AT5G35750, AT2G42540                                                                                                                                                                                                                                                               | 113 | 92  | 18499 | 12.45604 | 7.83E-03 | 4.62E-04 | 2.79E-02 |
| osmotic | GO:0006468~protein phosphorylation                                          | 18 | 15.79 | 1.85E-05 | AT3G08730, AT5G08590, AT4G33950, AT1G60940, AT1G10940, AT5G66880, AT4G01370, AT3G46930, AT1G72180, AT2G43850, AT4G40010, AT5G57630, AT5G45800, AT2G23030, AT5G63650, AT3G50500, AT3G17510, AT1G78290                                                                                                                                      | 113 | 870 | 18499 | 3.387061 | 7.20E-03 | 4.51E-04 | 2.57E-02 |
| osmotic | GO:0009408~response to heat                                                 | 9  | 7.89  | 5.83E-06 | AT5G57050, AT1G16540, AT1G50500, AT5G12030, AT2G38750, AT5G67030, AT5G03280, AT3G25230, AT1G35720                                                                                                                                                                                                                                         | 113 | 160 | 18499 | 9.208573 | 2.28E-03 | 1.52E-04 | 8.11E-03 |
| osmotic | GO:0010029~regulation of seed germination                                   | 6  | 5.26  | 4.13E-06 | AT1G42550, AT3G63060, AT1G27320, AT3G50500, AT5G35750, AT5G66880                                                                                                                                                                                                                                                                          | 113 | 40  | 18499 | 24.55619 | 1.61E-03 | 1.15E-04 | 5.74E-03 |
| osmotic | GO:0042742~defense response to bacterium                                    | 12 | 10.53 | 9.25E-07 | AT4G39090, AT3G54560, AT1G16540, AT3G46930, AT3G56400, AT5G24660, AT1G27320, AT4G33950, AT2G43790, AT5G03280, AT4G18780, AT2G41560                                                                                                                                                                                                        | 113 | 276 | 18499 | 7.117738 | 3.62E-04 | 2.78E-05 | 1.29E-03 |
| osmotic | GO:0009631~cold acclimation                                                 | 7  | 6.14  | 6.21E-07 | AT5G67590, AT5G15960, AT1G20440, AT4G13850, AT4G04920, AT4G08500, AT2G42540                                                                                                                                                                                                                                                               | 113 | 51  | 18499 | 22.46972 | 2.43E-04 | 2.02E-05 | 8.63E-04 |
| osmotic | GO:0006972~hyperosmotic response                                            | 6  | 5.26  | 3.34E-09 | AT4G38240, AT4G01370, AT5G12030, AT3G12490, AT5G19660, AT2G40880                                                                                                                                                                                                                                                                          | 113 | 11  | 18499 | 89.29525 | 1.30E-06 | 1.19E-07 | 4.64E-06 |
| osmotic | GO:0035556~intracellular signal transduction                                | 13 | 11.40 | 1.65E-09 | AT3G08730, AT5G08590, AT4G33950, AT1G60940, AT1G10940, AT5G66880, AT5G57630, AT4G40010, AT2G23030, AT5G63650, AT3G50500, AT3G17510, AT1G78290                                                                                                                                                                                             | 113 | 189 | 18499 | 11.26034 | 6.46E-07 | 6.46E-08 | 2.30E-06 |
| osmotic | GO:0006979~response to oxidative stress                                     | 16 | 14.04 | 2.49E-10 | AT2G22660, AT4G37900, AT5G03280, AT4G34710, AT2G40880, AT1G32230, AT2G32700, AT3G46930, AT3G45640, AT5G01410, AT3G12490, AT2G43790, AT1G35910, AT2G35510, AT2G31870, AT1G35720                                                                                                                                                            | 113 | 291 | 18499 | 9.001125 | 9.74E-08 | 1.08E-08 | 3.46E-07 |
| osmotic | GO:0009738~abscisic acid-activated signaling pathway                        | 14 | 12.28 | 1.81E-10 | AT2G17820, AT2G22660, AT2G01150, AT1G53300, AT3G63060, AT4G33950, AT4G17615, AT5G66880, AT5G57050, AT2G40220, AT3G45640, AT1G42550, AT3G50500, AT1G15100                                                                                                                                                                                  | 113 | 195 | 18499 | 11.75339 | 7.08E-08 | 8.85E-09 | 2.52E-07 |
| osmotic | GO:0047484~regulation of response to osmotic stress                         | 7  | 6.14  | 3.00E-13 | AT2G32700, AT5G19690, AT5G24660, AT5G62090, AT1G29060, AT4G25520, AT1G15100                                                                                                                                                                                                                                                               | 113 | 7   | 18499 | 163.708  | 1.17E-10 | 1.67E-11 | 4.17E-10 |
| osmotic | GO:0071470~cellular response to osmotic stress                              | 9  | 7.89  | 6.23E-17 | AT5G58580, AT4G16830, AT2G22660, AT5G57630, AT5G62460, AT5G13170, AT4G37900, AT2G47900, AT5G57345                                                                                                                                                                                                                                         | 113 | 10  | 18499 | 147.3372 | 4.34E-14 | 7.22E-15 | 1.55E-13 |
| osmotic | GO:0009409~response to cold                                                 | 23 | 20.18 | 5.37E-18 | AT3G08730, AT1G16540, AT5G15960, AT1G20440, AT4G13850, AT1G27320, AT4G17615, AT4G34710, AT2G42540, AT2G40880, AT3G59770, AT5G06760, AT4G01370, AT5G52310, AT2G38750, AT2G21660, AT3G45640, AT3G23830, AT1G77120, AT3G12490, AT2G43790, AT4G08500, AT1G35720                                                                               | 113 | 299 | 18499 | 12.59292 | 2.10E-15 | 4.20E-16 | 7.47E-15 |
| osmotic | GO:0009737~response to abscisic acid                                        | 27 | 23.68 | 5.38E-20 | AT5G15960, AT5G66880, AT5G52310, AT3G46930, AT1G65690, AT2G38750, AT1G64670, AT1G77120, AT3G50500, AT3G17510, AT1G55870, AT4G16830, AT1G20440, AT1G53300, AT3G63060, AT4G33950, AT1G10940, AT4G34710, AT2G42540, AT5G57050, AT4G01370, AT2G40190, AT2G43790, AT5G08560, AT4G14605, AT5G35750, AT1G35720                                   | 113 | 394 | 18499 | 11.21857 | 2.10E-17 | 5.26E-18 | 7.48E-17 |
| osmotic | GO:0009414~response to water deprivation                                    | 39 | 34.21 | 1.93E-41 | AT5G15960, AT4G13850, AT1G27320, AT4G18780, AT5G66880, AT2G40880, AT1G32230, AT1G32560, AT5G52310, AT1G02730, AT1G69310, AT3G46930, AT2G38750, AT2G21660, AT1G77120, AT3G50500, AT2G31870, AT2G17820, AT2G37180, AT1G20440, AT3G63060, AT3G12630, AT4G33950, AT4G17615, AT4G01420, AT2G42540, AT5G06760, AT4G39090, AT5G57050, AT2G32700, | 113 | 279 | 18499 | 22.88391 | 7.54E-39 | 2.51E-39 | 2.68E-38 |

|           |                                                                 |    |       |           |                                                                                                                                                                                                                                                                                                                                                                                                                                                                                                                                                                                                                                                                                                                                                                                                                                                                                                                           |     |      |       |          |           |           |           |
|-----------|-----------------------------------------------------------------|----|-------|-----------|---------------------------------------------------------------------------------------------------------------------------------------------------------------------------------------------------------------------------------------------------------------------------------------------------------------------------------------------------------------------------------------------------------------------------------------------------------------------------------------------------------------------------------------------------------------------------------------------------------------------------------------------------------------------------------------------------------------------------------------------------------------------------------------------------------------------------------------------------------------------------------------------------------------------------|-----|------|-------|----------|-----------|-----------|-----------|
|           |                                                                 |    |       |           | AT2G35300, AT3G23830, AT2G40220, AT5G67030, AT3G14440, AT3G12490, AT3G56580, AT5G35750, AT1G35720                                                                                                                                                                                                                                                                                                                                                                                                                                                                                                                                                                                                                                                                                                                                                                                                                         |     |      |       |          |           |           |           |
| osmotic   | GO:0009651~response to salt stress                              | 49 | 42.98 | 2.89E-46  | AT4G13850, AT1G60940, AT5G52310, AT2G38750, AT1G77120, AT3G50500, AT1G16540, AT4G16830, AT5G08590, AT2G47900, AT2G18250, AT1G10940, AT4G17615, AT4G39090, AT3G23830, AT2G43790, AT4G08500, AT1G35720, AT1G27320, AT5G03280, AT5G49450, AT5G66880, AT1G32230, AT1G02730, AT1G69310, AT3G46930, AT2G21660, AT5G01410, AT5G63650, AT3G17510, AT1G55870, AT3G08730, AT1G53300, AT5G24660, AT3G63060, AT4G33950, AT4G34710, AT4G01420, AT2G42540, AT2G41560, AT4G01370, AT3G20250, AT4G40010, AT5G19690, AT4G14605, AT5G35750, AT1G35910, AT2G35510, AT1G15100                                                                                                                                                                                                                                                                                                                                                                 | 113 | 484  | 18499 | 16.57374 | 1.13E-43  | 5.65E-44  | 4.02E-43  |
| osmotic   | GO:0006970~response to osmotic stress                           | 81 | 71.05 | 3.45E-162 | AT1G55180, AT5G15960, AT4G13850, AT4G18780, AT1G60940, AT5G52310, AT2G38750, AT1G64670, AT1G77120, AT1G42550, AT3G58620, AT5G01270, AT3G50500, AT1G78290, AT4G16830, AT1G16540, AT2G37180, AT5G08590, AT4G04340, AT2G18250, AT4G17615, AT1G10940, AT4G39090, AT5G57050, AT1G50500, AT2G43850, AT5G67590, AT2G35300, AT2G40220, AT2G40190, AT3G23830, AT1G58200, AT2G43790, AT4G04920, AT4G08500, AT1G35720, AT1G43700, AT1G27320, AT5G49450, AT3G25230, AT5G03280, AT5G66880, AT3G59770, AT1G32230, AT1G32560, AT3G46930, AT1G69310, AT1G02730, AT1G65690, AT3G45640, AT2G21660, AT2G23030, AT5G63650, AT3G17510, AT1G55870, AT2G31870, AT5G35550, AT3G08730, AT2G17820, AT2G22660, AT1G20440, AT1G53300, AT3G63060, AT3G12630, AT4G33950, AT2G42580, AT4G34710, AT4G01420, AT2G42540, AT2G41560, AT5G06760, AT4G40010, AT3G20250, AT5G67030, AT3G14440, AT4G14605, AT5G53060, AT5G08560, AT5G35750, AT1G35910, AT2G35510 | 113 | 122  | 18499 | 108.6914 | 1.35E-159 | 1.35E-159 | 4.80E-159 |
| oxidative | GO:000302~response to reactive oxygen species                   | 4  | 2.65  | 2.34E-03  | AT4G35000, AT2G01980, AT3G09640, AT4G02380                                                                                                                                                                                                                                                                                                                                                                                                                                                                                                                                                                                                                                                                                                                                                                                                                                                                                | 150 | 33   | 18499 | 14.94869 | 5.74E-01  | 4.18E-02  | 3.17E+00  |
| oxidative | GO:0045454~cell redox homeostasis                               | 7  | 4.64  | 1.61E-03  | AT1G76080, AT4G35090, AT5G60640, AT3G06050, AT4G03520, AT1G03680, AT3G15360                                                                                                                                                                                                                                                                                                                                                                                                                                                                                                                                                                                                                                                                                                                                                                                                                                               | 150 | 155  | 18499 | 5.569591 | 4.45E-01  | 3.05E-02  | 2.20E+00  |
| oxidative | GO:0071329~cellular response to sucrose stimulus                | 3  | 1.99  | 1.32E-03  | AT3G11220, AT2G28190, AT1G08830                                                                                                                                                                                                                                                                                                                                                                                                                                                                                                                                                                                                                                                                                                                                                                                                                                                                                           | 150 | 7    | 18499 | 52.85429 | 3.81E-01  | 2.63E-02  | 1.80E+00  |
| oxidative | GO:0071493~cellular response to UV-B                            | 3  | 1.99  | 1.32E-03  | AT5G18100, AT2G28190, AT1G08830                                                                                                                                                                                                                                                                                                                                                                                                                                                                                                                                                                                                                                                                                                                                                                                                                                                                                           | 150 | 7    | 18499 | 52.85429 | 3.81E-01  | 2.63E-02  | 1.80E+00  |
| oxidative | GO:0071484~cellular response to light intensity                 | 3  | 1.99  | 6.34E-04  | AT5G18100, AT2G28190, AT1G08830                                                                                                                                                                                                                                                                                                                                                                                                                                                                                                                                                                                                                                                                                                                                                                                                                                                                                           | 150 | 5    | 18499 | 73.996   | 2.06E-01  | 1.35E-02  | 8.69E-01  |
| oxidative | GO:0031538~negative regulation of anthocyanin metabolic process | 3  | 1.99  | 3.83E-04  | AT3G11220, AT5G13680, AT4G10090                                                                                                                                                                                                                                                                                                                                                                                                                                                                                                                                                                                                                                                                                                                                                                                                                                                                                           | 150 | 4    | 18499 | 92.495   | 1.30E-01  | 8.67E-03  | 5.25E-01  |
| oxidative | GO:1902884~positive regulation of response to oxidative stress  | 3  | 1.99  | 3.83E-04  | AT5G58070, AT3G06930, AT4G17410                                                                                                                                                                                                                                                                                                                                                                                                                                                                                                                                                                                                                                                                                                                                                                                                                                                                                           | 150 | 4    | 18499 | 92.495   | 1.30E-01  | 8.67E-03  | 5.25E-01  |
| oxidative | GO:0009408~response to heat                                     | 8  | 5.30  | 3.18E-04  | AT5G59820, AT3G53990, AT5G58070, AT3G47860, AT3G04120, AT5G03280, AT2G19310, AT1G35720                                                                                                                                                                                                                                                                                                                                                                                                                                                                                                                                                                                                                                                                                                                                                                                                                                    | 150 | 160  | 18499 | 6.166333 | 1.09E-01  | 7.68E-03  | 4.36E-01  |
| oxidative | GO:0090156~cellular sphingolipid homeostasis                    | 3  | 1.99  | 1.92E-04  | AT5G42000, AT1G01230, AT1G07380                                                                                                                                                                                                                                                                                                                                                                                                                                                                                                                                                                                                                                                                                                                                                                                                                                                                                           | 150 | 3    | 18499 | 123.3267 | 6.76E-02  | 4.99E-03  | 2.64E-01  |
| oxidative | GO:0071457~cellular response to ozone                           | 3  | 1.99  | 1.92E-04  | AT5G18100, AT2G28190, AT1G08830                                                                                                                                                                                                                                                                                                                                                                                                                                                                                                                                                                                                                                                                                                                                                                                                                                                                                           | 150 | 3    | 18499 | 123.3267 | 6.76E-02  | 4.99E-03  | 2.64E-01  |
| oxidative | GO:0010193~response to ozone                                    | 5  | 3.31  | 1.38E-04  | AT4G25100, AT3G47450, AT1G08830, AT3G06110, AT1G32230                                                                                                                                                                                                                                                                                                                                                                                                                                                                                                                                                                                                                                                                                                                                                                                                                                                                     | 150 | 33   | 18499 | 18.68586 | 4.90E-02  | 3.85E-03  | 1.90E-01  |
| oxidative | GO:0006457~protein folding                                      | 11 | 7.28  | 1.17E-04  | AT1G76080, AT3G62030, AT5G60640, AT1G09210, AT5G42000, AT1G56340, AT4G17070, AT1G01230, AT4G03520, AT1G03680, AT3G15360                                                                                                                                                                                                                                                                                                                                                                                                                                                                                                                                                                                                                                                                                                                                                                                                   | 150 | 288  | 18499 | 4.710394 | 4.15E-02  | 3.53E-03  | 1.60E-01  |
| oxidative | GO:0019430~removal of superoxide radicals                       | 4  | 2.65  | 1.07E-04  | AT4G25100, AT5G18100, AT2G28190, AT1G08830                                                                                                                                                                                                                                                                                                                                                                                                                                                                                                                                                                                                                                                                                                                                                                                                                                                                                | 150 | 12   | 18499 | 41.10889 | 3.81E-02  | 3.53E-03  | 1.47E-01  |
| oxidative | GO:0006970~response to osmotic stress                           | 8  | 5.30  | 5.90E-05  | AT3G46930, AT3G45640, AT5G03280, AT1G35910, AT2G35510, AT1G35720, AT2G31870, AT1G32230                                                                                                                                                                                                                                                                                                                                                                                                                                                                                                                                                                                                                                                                                                                                                                                                                                    | 150 | 122  | 18499 | 8.086995 | 2.13E-02  | 2.15E-03  | 8.12E-02  |
| oxidative | GO:0009409~response to cold                                     | 12 | 7.95  | 3.13E-05  | AT5G63980, AT4G35090, AT5G59820, AT3G53990, AT3G45640, AT5G58070, AT1G27730, AT3G12490, AT4G02380, AT1G03680, AT1G35720, AT2G40880                                                                                                                                                                                                                                                                                                                                                                                                                                                                                                                                                                                                                                                                                                                                                                                        | 150 | 299  | 18499 | 4.949565 | 1.13E-02  | 1.27E-03  | 4.31E-02  |
| oxidative | GO:0055114~oxidation-reduction process                          | 28 | 18.54 | 7.17E-06  | AT4G25100, AT1G75280, AT1G08830, AT1G03680, AT1G76080, AT4G35090, AT3G06050, AT1G31170, AT4G35000, AT5G18100, AT3G09640, AT3G47450, AT3G11050, AT2G28190, AT5G25620, AT5G07460, AT1G63460, AT5G20230, AT2G39800, AT5G16990, AT4G25130, AT4G03520, AT5G16970, AT3G15360, AT2G14170, AT1G13440, AT4G04800, AT3G04120                                                                                                                                                                                                                                                                                                                                                                                                                                                                                                                                                                                                        | 150 | 1330 | 18499 | 2.596351 | 2.61E-03  | 3.26E-04  | 9.87E-03  |
| oxidative | GO:0009737~response to abscisic acid                            | 16 | 10.60 | 7.05E-07  | AT3G62030, AT3G01420, AT2G39800, AT5G39610, AT3G22380, AT2G05710, AT5G13680, AT3G16890, AT3G46930,                                                                                                                                                                                                                                                                                                                                                                                                                                                                                                                                                                                                                                                                                                                                                                                                                        | 150 | 394  | 18499 | 5.00819  | 2.57E-04  | 3.67E-05  | 9.70E-04  |

|           |                                                           |     |       |           |                                                                                                                                                                                                                                                                                                                                                                                                                                                                                                                                                                                                                                                                                                                                                                                                                                                                                                                                                                                                                                                                                                                                                                                                                                                                                                                                                                                                                                                                                      |     |     |       |          |           |           |           |
|-----------|-----------------------------------------------------------|-----|-------|-----------|--------------------------------------------------------------------------------------------------------------------------------------------------------------------------------------------------------------------------------------------------------------------------------------------------------------------------------------------------------------------------------------------------------------------------------------------------------------------------------------------------------------------------------------------------------------------------------------------------------------------------------------------------------------------------------------------------------------------------------------------------------------------------------------------------------------------------------------------------------------------------------------------------------------------------------------------------------------------------------------------------------------------------------------------------------------------------------------------------------------------------------------------------------------------------------------------------------------------------------------------------------------------------------------------------------------------------------------------------------------------------------------------------------------------------------------------------------------------------------------|-----|-----|-------|----------|-----------|-----------|-----------|
|           |                                                           |     |       |           | AT3G11220, AT3G47860, AT1G27730, AT4G02380, AT3G11050, AT1G32640, AT1G35720                                                                                                                                                                                                                                                                                                                                                                                                                                                                                                                                                                                                                                                                                                                                                                                                                                                                                                                                                                                                                                                                                                                                                                                                                                                                                                                                                                                                          |     |     |       |          |           |           |           |
| oxidative | GO:0009414~response to water deprivation                  | 15  | 9.93  | 6.00E-08  | AT1G76080, AT5G63980, AT3G46930, AT2G39800, AT5G58070, AT1G27730, AT3G47860, AT1G02930, AT3G12490, AT3G22380, AT4G02380, AT2G40880, AT1G35720, AT2G31870, AT1G32230                                                                                                                                                                                                                                                                                                                                                                                                                                                                                                                                                                                                                                                                                                                                                                                                                                                                                                                                                                                                                                                                                                                                                                                                                                                                                                                  | 150 | 279 | 18499 | 6.630466 | 2.18E-05  | 3.64E-06  | 8.25E-05  |
| oxidative | GO:0046686~response to cadmium ion                        | 17  | 11.26 | 1.74E-08  | AT2G01140, AT4G25100, AT1G56340, AT1G52760, AT1G02930, AT2G05710, AT5G56550, AT3G22200, AT1G75280, AT5G16970, AT4G26970, AT1G13440, AT3G06050, AT3G04120, AT5G59880, AT3G14990, AT1G35720                                                                                                                                                                                                                                                                                                                                                                                                                                                                                                                                                                                                                                                                                                                                                                                                                                                                                                                                                                                                                                                                                                                                                                                                                                                                                            | 150 | 342 | 18499 | 6.130273 | 6.32E-06  | 1.26E-06  | 2.39E-05  |
| oxidative | GO:0042542~response to hydrogen peroxide                  | 9   | 5.96  | 1.12E-08  | AT2G01980, AT1G52760, AT5G39610, AT3G04120, AT4G02380, AT4G03240, AT2G19310, AT1G16420, AT1G32230                                                                                                                                                                                                                                                                                                                                                                                                                                                                                                                                                                                                                                                                                                                                                                                                                                                                                                                                                                                                                                                                                                                                                                                                                                                                                                                                                                                    | 150 | 54  | 18499 | 20.55444 | 4.06E-06  | 1.01E-06  | 1.53E-05  |
| oxidative | GO:0009651~response to salt stress                        | 25  | 16.56 | 9.52E-13  | AT3G62030, AT1G09210, AT2G39800, AT1G56340, AT5G39610, AT4G25130, AT1G02930, AT2G05710, AT5G03280, AT3G22200, AT1G08830, AT1G32230, AT3G16890, AT5G63980, AT3G46930, AT1G49300, AT2G01980, AT5G01410, AT1G27730, AT3G47450, AT2G47510, AT3G04120, AT1G35910, AT2G35510, AT1G35720                                                                                                                                                                                                                                                                                                                                                                                                                                                                                                                                                                                                                                                                                                                                                                                                                                                                                                                                                                                                                                                                                                                                                                                                    | 150 | 484 | 18499 | 6.370179 | 3.47E-10  | 1.16E-10  | 1.31E-09  |
| oxidative | GO:0034599~cellular response to oxidative stress          | 20  | 13.25 | 3.17E-25  | AT3G07700, AT2G41090, AT5G07460, AT4G25130, AT1G07380, AT4G03520, AT5G57345, AT4G00290, AT1G03680, AT1G08830, AT3G15360, AT1G76080, AT1G66330, AT1G31170, AT5G64940, AT4G35000, AT4G04800, AT3G09640, AT2G28190, AT3G06110                                                                                                                                                                                                                                                                                                                                                                                                                                                                                                                                                                                                                                                                                                                                                                                                                                                                                                                                                                                                                                                                                                                                                                                                                                                           | 150 | 64  | 18499 | 38.53958 | 1.15E-22  | 5.76E-23  | 4.36E-22  |
| oxidative | GO:0006979~response to oxidative stress                   | 130 | 86.09 | 2.03E-223 | AT4G12000, AT3G20340, AT1G72060, AT2G21195, AT5G50350, AT2G19310, AT1G30460, AT1G03680, AT1G69190, AT3G46090, AT4G35090, AT3G11220, AT4G35000, AT3G53990, AT4G17070, AT1G27730, AT4G11850, AT2G28190, AT4G03240, AT5G59080, AT2G01140, AT1G63460, AT1G80130, AT4G39640, AT5G41150, AT5G16990, AT3G55460, AT4G03520, AT5G13680, AT2G21640, AT1G21520, AT2G14170, AT2G01980, AT1G52200, AT3G01420, AT3G10020, AT3G16670, AT5G03280, AT5G56550, AT3G22200, AT1G09970, AT1G08830, AT1G75280, AT4G26970, AT1G76080, AT3G46930, AT1G31170, AT1G49300, AT5G01410, AT1G14870, AT3G47860, AT4G11830, AT2G31870, AT5G07460, AT2G40000, AT2G39800, AT2G05710, AT1G64360, AT5G16970, AT3G15360, AT1G09000, AT3G60980, AT1G73120, AT1G13340, AT5G37510, AT3G23910, AT1G11210, AT1G35910, AT3G06110, AT1G50170, AT4G25100, AT5G60640, AT3G53030, AT3G22380, AT1G78410, AT2G24150, AT1G49670, AT2G40880, AT2G22080, AT3G16890, AT5G08670, AT5G27830, AT3G06050, AT2G04795, AT4G08940, AT5G18100, AT3G09640, AT2G47510, AT4G02380, AT5G59880, AT1G52500, AT5G47650, AT4G02580, AT1G32220, AT3G25530, AT1G52760, AT5G39610, AT3G12490, AT3G51610, AT1G19020, AT1G35720, AT5G59820, AT3G62030, AT2G44240, AT1G56340, AT4G11010, AT2G15560, AT1G50290, AT2G19810, AT5G20140, AT1G32230, AT5G19875, AT3G45640, AT5G09830, AT3G47450, AT3G14430, AT3G11050, AT5G43750, AT5G18040, AT5G20230, AT1G09210, AT1G02930, AT1G27330, AT1G16420, AT1G13440, AT3G08670, AT3G04120, AT5G55070, AT4G10090, AT2G35510 | 150 | 291 | 18499 | 55.09439 | 7.39E-221 | 7.39E-221 | 2.79E-220 |
| salt      | GO:0042542~response to hydrogen peroxide                  | 5   | 2.16  | 4.06E-03  | AT2G01980, AT2G47180, AT2G47900, AT2G43790, AT1G32230                                                                                                                                                                                                                                                                                                                                                                                                                                                                                                                                                                                                                                                                                                                                                                                                                                                                                                                                                                                                                                                                                                                                                                                                                                                                                                                                                                                                                                | 224 | 54  | 18499 | 7.646743 | 8.90E-01  | 5.00E-02  | 5.75E+00  |
| salt      | GO:0009658~chloroplast organization                       | 7   | 3.03  | 4.10E-03  | AT5G24120, AT5G55580, AT1G43160, AT3G18870, AT3G57180, AT4G14605, AT2G34620                                                                                                                                                                                                                                                                                                                                                                                                                                                                                                                                                                                                                                                                                                                                                                                                                                                                                                                                                                                                                                                                                                                                                                                                                                                                                                                                                                                                          | 224 | 125 | 18499 | 4.62475  | 8.92E-01  | 4.93E-02  | 5.80E+00  |
| salt      | GO:0098719~sodium ion import across plasma membrane       | 3   | 1.30  | 3.86E-03  | AT5G27150, AT2G01980, AT3G06370                                                                                                                                                                                                                                                                                                                                                                                                                                                                                                                                                                                                                                                                                                                                                                                                                                                                                                                                                                                                                                                                                                                                                                                                                                                                                                                                                                                                                                                      | 224 | 8   | 18499 | 30.96931 | 8.77E-01  | 4.87E-02  | 5.48E+00  |
| salt      | GO:0010337~regulation of salicylic acid metabolic process | 3   | 1.30  | 3.86E-03  | AT1G28380, AT1G05850, AT2G41010                                                                                                                                                                                                                                                                                                                                                                                                                                                                                                                                                                                                                                                                                                                                                                                                                                                                                                                                                                                                                                                                                                                                                                                                                                                                                                                                                                                                                                                      | 224 | 8   | 18499 | 30.96931 | 8.77E-01  | 4.87E-02  | 5.48E+00  |
| salt      | GO:0009863~salicylic acid mediated signaling pathway      | 4   | 1.73  | 3.66E-03  | AT1G66350, AT2G01570, AT3G03450, AT1G14920                                                                                                                                                                                                                                                                                                                                                                                                                                                                                                                                                                                                                                                                                                                                                                                                                                                                                                                                                                                                                                                                                                                                                                                                                                                                                                                                                                                                                                           | 224 | 26  | 18499 | 12.70536 | 8.63E-01  | 4.73E-02  | 5.20E+00  |
| salt      | GO:0009867~jasmonic acid mediated signaling pathway       | 5   | 2.16  | 3.54E-03  | AT1G66350, AT2G01570, AT3G03450, AT1G14920, AT1G32230                                                                                                                                                                                                                                                                                                                                                                                                                                                                                                                                                                                                                                                                                                                                                                                                                                                                                                                                                                                                                                                                                                                                                                                                                                                                                                                                                                                                                                | 224 | 52  | 18499 | 7.940848 | 8.54E-01  | 4.69E-02  | 5.03E+00  |
| salt      | GO:0030154~cell differentiation                           | 11  | 4.76  | 3.26E-03  | AT2G32700, AT4G37260, AT1G66350, AT5G67300, AT3G23250, AT5G62090, AT3G03450, AT2G47460, AT4G25520, AT1G17950, AT1G66230                                                                                                                                                                                                                                                                                                                                                                                                                                                                                                                                                                                                                                                                                                                                                                                                                                                                                                                                                                                                                                                                                                                                                                                                                                                                                                                                                              | 224 | 296 | 18499 | 3.069031 | 8.30E-01  | 4.44E-02  | 4.65E+00  |
| salt      | GO:0009753~response to jasmonic acid                      | 8   | 3.46  | 2.87E-03  | AT4G37260, AT5G67300, AT3G23250, AT1G43160, AT2G39770, AT5G13330, AT5G03280, AT4G34710                                                                                                                                                                                                                                                                                                                                                                                                                                                                                                                                                                                                                                                                                                                                                                                                                                                                                                                                                                                                                                                                                                                                                                                                                                                                                                                                                                                               | 224 | 156 | 18499 | 4.235119 | 7.89E-01  | 4.02E-02  | 4.10E+00  |



|      |                                                                               |    |       |          |                                                                                                                                                                                                                                                                                                                                                                                                                                                                                                               |     |      |       |          |          |          |          |
|------|-------------------------------------------------------------------------------|----|-------|----------|---------------------------------------------------------------------------------------------------------------------------------------------------------------------------------------------------------------------------------------------------------------------------------------------------------------------------------------------------------------------------------------------------------------------------------------------------------------------------------------------------------------|-----|------|-------|----------|----------|----------|----------|
| salt | GO:0009740~gibberellic acid mediated signaling pathway                        | 6  | 2.60  | 1.88E-03 | AT2G27300, AT5G614920, AT1G66350, AT2G01570, AT3G03450, AT1G14920                                                                                                                                                                                                                                                                                                                                                                                                                                             | 224 | 73   | 18499 | 6.787794 | 6.39E-01 | 2.72E-02 | 2.70E+00 |
| salt | GO:0009620~response to fungus                                                 | 6  | 2.60  | 1.77E-03 | AT4G01370, AT2G32700, AT3G05360, AT2G47900, AT1G73500, AT2G43790                                                                                                                                                                                                                                                                                                                                                                                                                                              | 224 | 72   | 18499 | 6.882068 | 6.17E-01 | 2.63E-02 | 2.54E+00 |
| salt | GO:0009825~multidimensional cell growth                                       | 4  | 1.73  | 1.69E-03 | AT1G03060, AT5G60920, AT3G46550, AT1G05850                                                                                                                                                                                                                                                                                                                                                                                                                                                                    | 224 | 20   | 18499 | 16.51696 | 6.01E-01 | 2.59E-02 | 2.44E+00 |
| salt | GO:0048573~photoperiodism, flowering                                          | 5  | 2.16  | 1.47E-03 | AT5G63980, AT2G27300, AT3G44110, AT1G06040, AT2G35510                                                                                                                                                                                                                                                                                                                                                                                                                                                         | 224 | 41   | 18499 | 10.07132 | 5.49E-01 | 2.31E-02 | 2.12E+00 |
| salt | GO:0048366~leaf development                                                   | 8  | 3.46  | 8.06E-04 | AT4G24560, AT5G27150, AT1G15690, AT3G47450, AT4G33950, AT5G56030, AT4G38630, AT5G02410                                                                                                                                                                                                                                                                                                                                                                                                                        | 224 | 125  | 18499 | 5.285429 | 3.54E-01 | 1.32E-02 | 1.17E+00 |
| salt | GO:0042742~defense response to bacterium                                      | 12 | 5.19  | 5.46E-04 | AT5G46350, AT1G16540, AT3G62030, AT3G46930, AT5G67300, AT2G39770, AT2G38470, AT4G33950, AT2G43790, AT5G03280, AT1G10170, AT2G41560                                                                                                                                                                                                                                                                                                                                                                            | 224 | 276  | 18499 | 3.590644 | 2.56E-01 | 9.21E-03 | 7.92E-01 |
| salt | GO:0006814~sodium ion transport                                               | 5  | 2.16  | 5.01E-04 | AT5G27150, AT2G01980, AT4G10310, AT3G06370, AT3G19490                                                                                                                                                                                                                                                                                                                                                                                                                                                         | 224 | 31   | 18499 | 13.32013 | 2.38E-01 | 8.72E-03 | 7.27E-01 |
| salt | GO:0045892~negative regulation of transcription, DNA-templated                | 9  | 3.90  | 2.23E-04 | AT3G61050, AT5G63980, AT5G03740, AT2G32700, AT4G26630, AT5G05660, AT4G06634, AT1G27730, AT4G21670                                                                                                                                                                                                                                                                                                                                                                                                             | 224 | 134  | 18499 | 5.546742 | 1.14E-01 | 4.02E-03 | 3.24E-01 |
| salt | GO:0006355~regulation of transcription, DNA-templated                         | 45 | 19.48 | 2.12E-04 | AT3G57180, AT3G06930, AT1G16060, AT5G49450, AT1G14920, AT1G17950, AT5G24120, AT3G61890, AT1G69310, AT1G43160, AT3G18870, AT5G67300, AT5G04760, AT2G45640, AT5G62090, AT2G38470, AT2G47460, AT4G25520, AT1G10170, AT1G14350, AT2G26430, AT5G46350, AT2G01570, AT5G05660, AT5G63110, AT1G06040, AT1G12610, AT2G30250, AT5G13330, AT2G47900, AT3G06590, AT2G34620, AT1G66230, AT2G27300, AT5G55580, AT2G32700, AT4G37260, AT1G66350, AT2G01430, AT3G23250, AT3G51960, AT2G38340, AT5G08520, AT4G14605, AT3G03450 | 224 | 2119 | 18499 | 1.753807 | 1.08E-01 | 3.95E-03 | 3.08E-01 |
| salt | GO:0009739~response to gibberellin                                            | 8  | 3.46  | 1.96E-04 | AT2G27300, AT5G14920, AT1G66350, AT5G67300, AT3G50500, AT3G03450, AT1G14920, AT5G66880                                                                                                                                                                                                                                                                                                                                                                                                                        | 224 | 99   | 18499 | 6.673521 | 1.01E-01 | 3.78E-03 | 2.85E-01 |
| salt | GO:2000033~regulation of seed dormancy process                                | 4  | 1.73  | 1.38E-04 | AT1G66350, AT2G01570, AT3G03450, AT1G14920                                                                                                                                                                                                                                                                                                                                                                                                                                                                    | 224 | 9    | 18499 | 36.70437 | 7.19E-02 | 2.76E-03 | 2.00E-01 |
| salt | GO:0009789~positive regulation of abscisic acid-activated signaling pathway   | 6  | 2.60  | 5.09E-05 | AT1G53300, AT5G03280, AT3G50500, AT5G66880, AT3G17980, AT1G15100                                                                                                                                                                                                                                                                                                                                                                                                                                              | 224 | 34   | 18499 | 14.57379 | 2.72E-02 | 1.06E-03 | 7.41E-02 |
| salt | GO:0035556~intracellular signal transduction                                  | 12 | 5.19  | 1.91E-05 | AT5G08590, AT5G57630, AT4G40010, AT4G23650, AT5G63650, AT5G35410, AT4G33950, AT1G60940, AT3G50500, AT1G10940, AT3G17510, AT5G66880                                                                                                                                                                                                                                                                                                                                                                            | 224 | 189  | 18499 | 5.243481 | 1.03E-02 | 4.14E-04 | 2.78E-02 |
| salt | GO:0034605~cellular response to heat                                          | 6  | 2.60  | 1.30E-05 | AT1G43160, AT2G38340, AT2G30250, AT5G61780, AT2G38470, AT5G07350                                                                                                                                                                                                                                                                                                                                                                                                                                              | 224 | 26   | 18499 | 19.05804 | 7.03E-03 | 3.07E-04 | 1.90E-02 |
| salt | GO:0045893~positive regulation of transcription, DNA-templated                | 13 | 5.63  | 1.33E-05 | AT2G37678, AT5G05660, AT4G06634, AT5G13330, AT5G49450, AT5G24120, AT2G32700, AT3G61890, AT3G05700, AT2G38340, AT1G43160, AT1G73500, AT2G47460                                                                                                                                                                                                                                                                                                                                                                 | 224 | 217  | 18499 | 4.947478 | 7.21E-03 | 3.01E-04 | 1.94E-02 |
| salt | GO:1901000~regulation of response to salt stress                              | 4  | 1.73  | 6.85E-06 | AT5G58580, AT2G37678, AT4G24560, AT4G14300                                                                                                                                                                                                                                                                                                                                                                                                                                                                    | 224 | 4    | 18499 | 82.58482 | 3.71E-03 | 1.69E-04 | 9.98E-03 |
| salt | GO:0009938~negative regulation of gibberellic acid mediated signaling pathway | 5  | 2.16  | 6.35E-06 | AT2G27300, AT1G66350, AT2G01570, AT3G03450, AT1G14920                                                                                                                                                                                                                                                                                                                                                                                                                                                         | 224 | 11   | 18499 | 37.53856 | 3.43E-03 | 1.64E-04 | 9.24E-03 |
| salt | GO:0010228~vegetative to reproductive phase transition of meristem            | 10 | 4.33  | 3.97E-06 | AT3G48680, AT3G51780, AT5G63110, AT1G06040, AT1G10570, AT1G60220, AT4G14300, AT5G63510, AT3G06930, AT3G63060                                                                                                                                                                                                                                                                                                                                                                                                  | 224 | 102  | 18499 | 8.096551 | 2.15E-03 | 1.19E-04 | 5.78E-03 |
| salt | GO:0071470~cellular response to osmotic stress                                | 5  | 2.16  | 4.08E-06 | AT5G58580, AT4G16830, AT5G57630, AT5G62460, AT2G47900                                                                                                                                                                                                                                                                                                                                                                                                                                                         | 224 | 10   | 18499 | 41.29241 | 2.21E-03 | 1.16E-04 | 5.94E-03 |
| salt | GO:0010187~negative regulation of seed germination                            | 6  | 2.60  | 4.23E-06 | AT1G66350, AT2G01570, AT1G16060, AT5G56030, AT3G03450, AT1G14920                                                                                                                                                                                                                                                                                                                                                                                                                                              | 224 | 21   | 18499 | 23.59566 | 2.29E-03 | 1.15E-04 | 6.16E-03 |
| salt | GO:1902074~response to salt                                                   | 5  | 2.16  | 2.47E-06 | AT2G32700, AT1G65690, AT5G08450, AT5G24240, AT2G34208                                                                                                                                                                                                                                                                                                                                                                                                                                                         | 224 | 9    | 18499 | 45.88046 | 1.34E-03 | 7.88E-05 | 3.60E-03 |
| salt | GO:1901002~positive regulation of response to salt stress                     | 5  | 2.16  | 6.99E-07 | AT5G46350, AT5G58070, AT1G29060, AT5G26751, AT3G17980                                                                                                                                                                                                                                                                                                                                                                                                                                                         | 224 | 7    | 18499 | 58.98916 | 3.79E-04 | 2.53E-05 | 1.02E-03 |
| salt | GO:0009738~abscisic acid-activated signaling pathway                          | 14 | 6.06  | 7.29E-07 | AT5G63980, AT4G23650, AT5G67300, AT2G38340, AT1G53300, AT3G63060, AT4G33950, AT3G46550, AT3G50500, AT4G17615, AT4G21670, AT5G66880, AT3G17980, AT1G15100                                                                                                                                                                                                                                                                                                                                                      | 224 | 195  | 18499 | 5.929167 | 3.95E-04 | 2.47E-05 | 1.06E-03 |
| salt | GO:0042538~hyperosmotic salinity response                                     | 9  | 3.90  | 3.91E-07 | AT1G66350, AT2G01570, AT5G46180, AT3G51960, AT5G01410, AT5G58070, AT3G03450, AT5G26751, AT1G14920                                                                                                                                                                                                                                                                                                                                                                                                             | 224 | 57   | 18499 | 13.03971 | 2.12E-04 | 1.51E-05 | 5.70E-04 |
| salt | GO:0006979~response to oxidative stress                                       | 19 | 8.23  | 1.63E-08 | AT3G62030, AT2G47180, AT2G16500, AT1G56600, AT5G03280, AT3G22200, AT4G34710, AT1G32230, AT3G16890, AT2G32700, AT3G46930, AT1G49300, AT2G01980, AT5G01410, AT1G27730, AT3G47450, AT2G43790, AT1G35910, AT2G35510                                                                                                                                                                                                                                                                                               | 224 | 291  | 18499 | 5.392136 | 8.86E-06 | 6.81E-07 | 2.38E-05 |
| salt | GO:0047484~regulation of response to osmotic stress                           | 6  | 2.60  | 5.01E-09 | AT2G32700, AT5G19690, AT5G62090, AT1G29060, AT4G25520, AT1G15100                                                                                                                                                                                                                                                                                                                                                                                                                                              | 224 | 7    | 18499 | 70.78699 | 2.72E-06 | 2.26E-07 | 7.30E-06 |
| salt | GO:0009723~response to ethylene                                               | 14 | 6.06  | 3.38E-09 | AT2G01570, AT4G24800, AT5G13330, AT5G40770, AT5G03280, AT1G14920, AT1G32230, AT4G37260, AT1G66350, AT3G23250, AT5G67300, AT2G43790, AT2G47460, AT3G03450                                                                                                                                                                                                                                                                                                                                                      | 224 | 124  | 18499 | 9.324093 | 1.83E-06 | 1.66E-07 | 4.92E-06 |
| salt | GO:0010029~regulation of seed germination                                     | 10 | 4.33  | 9.04E-10 | AT2G37678, AT2G01570, AT2G19450, AT3G63060, AT3G50500, AT3G03450,                                                                                                                                                                                                                                                                                                                                                                                                                                             | 224 | 40   | 18499 | 20.64621 | 4.90E-07 | 5.45E-08 | 1.32E-06 |

|      |                                                                    |     |       |           |                                                                                                                                                                                                                                                                                                                                                                                                                                                                                                                                                                                                                                                                                                                      |     |     |       |          |           |           |           |
|------|--------------------------------------------------------------------|-----|-------|-----------|----------------------------------------------------------------------------------------------------------------------------------------------------------------------------------------------------------------------------------------------------------------------------------------------------------------------------------------------------------------------------------------------------------------------------------------------------------------------------------------------------------------------------------------------------------------------------------------------------------------------------------------------------------------------------------------------------------------------|-----|-----|-------|----------|-----------|-----------|-----------|
|      |                                                                    |     |       |           | AT4G38630, AT1G14920, AT3G54770, AT5G66880                                                                                                                                                                                                                                                                                                                                                                                                                                                                                                                                                                                                                                                                           |     |     |       |          |           |           |           |
| salt | GO:0009408~response to heat                                        | 16  | 6.93  | 9.84E-10  | AT1G16540, AT3G44110, AT1G12610, AT2G47180, AT3G06010, AT2G04030, AT5G56030, AT5G03280, AT3G09350, AT1G59860, AT3G51780, AT5G58070, AT2G39770, AT2G38470, AT4G38630, AT1G05850                                                                                                                                                                                                                                                                                                                                                                                                                                                                                                                                       | 224 | 160 | 18499 | 8.258482 | 5.34E-07  | 5.34E-08  | 1.43E-06  |
| salt | GO:2000377~regulation of reactive oxygen species metabolic process | 10  | 4.33  | 1.19E-12  | AT2G32010, AT5G14920, AT1G66350, AT2G01570, AT2G01980, AT2G01900, AT4G33950, AT3G03450, AT1G14920, AT1G32230                                                                                                                                                                                                                                                                                                                                                                                                                                                                                                                                                                                                         | 224 | 21  | 18499 | 39.32611 | 6.43E-10  | 8.03E-11  | 1.73E-09  |
| salt | GO:1901001~negative regulation of response to salt stress          | 8   | 3.46  | 2.67E-13  | AT2G32700, AT3G51960, AT4G33730, AT5G62090, AT1G30580, AT4G25520, AT1G78310, AT3G49810                                                                                                                                                                                                                                                                                                                                                                                                                                                                                                                                                                                                                               | 224 | 8   | 18499 | 82.58482 | 1.45E-10  | 2.06E-11  | 3.88E-10  |
| salt | GO:0071472~cellular response to salt stress                        | 12  | 5.19  | 9.36E-14  | AT1G53210, AT1G03060, AT4G16830, AT2G27300, AT2G32010, AT5G57630, AT5G62460, AT3G45680, AT2G01900, AT3G49810, AT2G03680, AT1G67580                                                                                                                                                                                                                                                                                                                                                                                                                                                                                                                                                                                   | 224 | 33  | 18499 | 30.03084 | 5.07E-11  | 8.45E-12  | 1.36E-10  |
| salt | GO:0009409~response to cold                                        | 26  | 11.26 | 2.78E-14  | AT2G47180, AT2G19450, AT4G13850, AT1G56600, AT2G16500, AT5G63980, AT1G43160, AT3G22310, AT4G29810, AT1G27730, AT2G38470, AT3G50310, AT1G16540, AT5G08620, AT4G24500, AT2G30250, AT4G17615, AT4G34710, AT4G12480, AT4G01370, AT3G51780, AT3G51960, AT3G23830, AT5G58070, AT2G43790, AT4G24190                                                                                                                                                                                                                                                                                                                                                                                                                         | 224 | 299 | 18499 | 7.181289 | 1.50E-11  | 3.01E-12  | 4.04E-11  |
| salt | GO:0009414~response to water deprivation                           | 47  | 20.35 | 4.55E-39  | AT1G74920, AT2G47180, AT1G16060, AT4G13850, AT2G04030, AT2G45960, AT1G56600, AT5G66880, AT1G32230, AT3G61050, AT5G63980, AT5G03740, AT3G61890, AT3G46930, AT2G26650, AT1G02730, AT1G69310, AT3G05700, AT2G33700, AT1G43160, AT5G67300, AT3G22310, AT2G34208, AT1G27730, AT2G38470, AT3G50500, AT3G50310, AT1G05850, AT5G08620, AT1G12610, AT5G13330, AT3G06010, AT3G63060, AT4G33950, AT5G56030, AT3G51920, AT4G17615, AT3G54770, AT4G01420, AT2G32700, AT5G25370, AT1G15690, AT3G23830, AT2G38340, AT5G58070, AT4G24190, AT2G41010                                                                                                                                                                                  | 224 | 279 | 18499 | 13.91214 | 2.47E-36  | 6.16E-37  | 6.62E-36  |
| salt | GO:0009737~response to abscisic acid                               | 57  | 24.68 | 4.59E-44  | AT1G61210, AT4G32150, AT1G16060, AT3G16890, AT1G03060, AT5G03740, AT3G05700, AT5G14920, AT1G43160, AT5G67300, AT2G34208, AT1G27730, AT3G50500, AT5G46350, AT4G16830, AT5G13330, AT3G51920, AT1G10940, AT2G43790, AT4G38630, AT3G03450, AT4G27710, AT3G62030, AT5G08450, AT2G47180, AT2G19450, AT5G63510, AT3G48330, AT1G51500, AT1G56600, AT1G14920, AT1G17950, AT5G66880, AT3G48680, AT1G17840, AT1G65690, AT3G46930, AT3G61890, AT2G33700, AT5G24240, AT2G45640, AT3G17510, AT1G55870, AT2G01570, AT5G63110, AT1G53300, AT3G63060, AT4G33950, AT4G34710, AT3G54770, AT4G12480, AT4G01370, AT4G37260, AT5G25370, AT1G66350, AT1G56570, AT4G14605                                                                    | 224 | 394 | 18499 | 11.94755 | 2.49E-41  | 8.28E-42  | 6.68E-41  |
| salt | GO:0006970~response to osmotic stress                              | 40  | 17.32 | 2.37E-45  | AT4G13850, AT4G10310, AT5G03280, AT1G60940, AT5G49450, AT5G66880, AT1G32230, AT1G65690, AT3G61890, AT1G02730, AT1G69310, AT3G46930, AT1G59860, AT1G43160, AT5G63650, AT2G38470, AT3G50500, AT3G17510, AT1G55870, AT4G16830, AT1G16540, AT5G08590, AT2G30250, AT1G53300, AT3G63060, AT4G33950, AT2G18250, AT4G34710, AT1G10940, AT4G17615, AT4G01420, AT2G41560, AT4G40010, AT3G20250, AT3G23830, AT3G51960, AT4G14605, AT2G43790, AT1G35910, AT2G35510                                                                                                                                                                                                                                                               | 224 | 122 | 18499 | 27.07699 | 1.29E-42  | 6.43E-43  | 3.46E-42  |
| salt | GO:0009651~response to salt stress                                 | 173 | 74.89 | 3.80E-237 | AT1G74920, AT1G61210, AT4G24800, AT4G32150, AT1G16060, AT1G51460, AT3G46550, AT3G12360, AT1G60940, AT5G63980, AT3G61050, AT1G43160, AT1G27730, AT1G73500, AT3G50500, AT2G47460, AT3G50310, AT1G10170, AT3G19490, AT3G17980, AT2G26430, AT4G16830, AT5G60920, AT1G04120, AT1G73660, AT4G24500, AT3G55270, AT2G18250, AT4G17615, AT1G10940, AT5G22360, AT2G01980, AT3G51960, AT1G60490, AT2G43790, AT3G03450, AT4G38630, AT2G15390, AT3G06370, AT3G48850, AT1G10570, AT3G57180, AT2G19450, AT3G48330, AT4G10310, AT5G03280, AT2G16500, AT1G51500, AT1G14920, AT3G22200, AT5G66880, AT5G14040, AT5G11150, AT1G17840, AT1G13930, AT3G46930, AT1G49300, AT3G61890, AT1G59860, AT5G01410, AT1G05850, AT3G17510, AT1G55870, | 224 | 484 | 18499 | 29.51895 | 2.06E-234 | 2.06E-234 | 5.53E-234 |

|       |                                                                    |    |       |          |                                                                                                                                                                                                                                                                                                                                                                                                                                                                                                                                                                                                                                                                                                                                                                                                                                                                                                                                                                                                                                                                                                                                                                                                                                                          |     |      |       |          |          |          |          |
|-------|--------------------------------------------------------------------|----|-------|----------|----------------------------------------------------------------------------------------------------------------------------------------------------------------------------------------------------------------------------------------------------------------------------------------------------------------------------------------------------------------------------------------------------------------------------------------------------------------------------------------------------------------------------------------------------------------------------------------------------------------------------------------------------------------------------------------------------------------------------------------------------------------------------------------------------------------------------------------------------------------------------------------------------------------------------------------------------------------------------------------------------------------------------------------------------------------------------------------------------------------------------------------------------------------------------------------------------------------------------------------------------------|-----|------|-------|----------|----------|----------|----------|
|       |                                                                    |    |       |          | AT2G43430, AT3G27460, AT5G05660, AT2G30250, AT1G53300, AT3G63060, AT1G31470, AT4G33950, AT5G26751, AT1G10880, AT2G27300, AT5G55580, AT4G01370, AT4G40010, AT3G20250, AT1G66350, AT3G51780, AT1G15690, AT1G56570, AT1G16850, AT1G60220, AT2G39770, AT4G14605, AT4G24190, AT2G17270, AT1G35910, AT1G10370, AT1G15100, AT4G13850, AT2G04030, AT5G40770, AT1G50960, AT3G47950, AT5G37370, AT3G09350, AT3G16890, AT1G28380, AT5G03740, AT4G26630, AT3G05700, AT5G14920, AT5G67300, AT1G24460, AT4G22330, AT5G02410, AT1G16540, AT2G47580, AT5G08590, AT2G38170, AT1G06040, AT1G12610, AT5G13330, AT2G47900, AT3G51920, AT5G56030, AT4G21670, AT1G14080, AT5G27150, AT3G23250, AT3G23830, AT1G27760, AT1G30580, AT5G07350, AT2G16005, AT4G27710, AT3G44110, AT3G62030, AT5G35080, AT2G47180, AT5G63510, AT2G45960, AT5G49450, AT1G56600, AT1G32230, AT2G46500, AT3G48680, AT5G44440, AT2G26650, AT1G69310, AT1G02730, AT2G33700, AT3G22310, AT4G29810, AT5G40550, AT5G63650, AT3G47450, AT2G45640, AT2G38470, AT3G23940, AT5G02020, AT5G08620, AT4G24560, AT2G01570, AT5G46180, AT5G63110, AT3G06010, AT5G35410, AT4G34710, AT3G54770, AT4G01420, AT2G41560, AT1G64460, AT4G12480, AT5G25370, AT4G23650, AT5G19690, AT2G38340, AT5G61780, AT2G35510, AT2G41010 |     |      |       |          |          |          |          |
| water | GO:0080036~regulation of cytokinin-activated signaling pathway     | 3  | 1.42  | 4.26E-03 | AT4G31920, AT3G16857, AT2G25180                                                                                                                                                                                                                                                                                                                                                                                                                                                                                                                                                                                                                                                                                                                                                                                                                                                                                                                                                                                                                                                                                                                                                                                                                          | 208 | 9    | 18499 | 29.64583 | 8.82E-01 | 4.96E-02 | 5.96E+00 |
| water | GO:0034389~lipid particle organization                             | 3  | 1.42  | 4.26E-03 | AT1G67360, AT3G05500, AT2G47780                                                                                                                                                                                                                                                                                                                                                                                                                                                                                                                                                                                                                                                                                                                                                                                                                                                                                                                                                                                                                                                                                                                                                                                                                          | 208 | 9    | 18499 | 29.64583 | 8.82E-01 | 4.96E-02 | 5.96E+00 |
| water | GO:0042538~hyperosmotic salinity response                          | 5  | 2.37  | 3.79E-03 | AT2G39800, AT3G14080, AT5G44650, AT3G14440, AT1G19120                                                                                                                                                                                                                                                                                                                                                                                                                                                                                                                                                                                                                                                                                                                                                                                                                                                                                                                                                                                                                                                                                                                                                                                                    | 208 | 57   | 18499 | 7.801535 | 8.50E-01 | 4.53E-02 | 5.32E+00 |
| water | GO:1902456~regulation of stomatal opening                          | 3  | 1.42  | 3.34E-03 | AT5G57050, AT1G12480, AT4G33950                                                                                                                                                                                                                                                                                                                                                                                                                                                                                                                                                                                                                                                                                                                                                                                                                                                                                                                                                                                                                                                                                                                                                                                                                          | 208 | 8    | 18499 | 33.35156 | 8.13E-01 | 4.10E-02 | 4.70E+00 |
| water | GO:0080113~regulation of seed growth                               | 3  | 1.42  | 3.34E-03 | AT4G31920, AT3G16857, AT2G25180                                                                                                                                                                                                                                                                                                                                                                                                                                                                                                                                                                                                                                                                                                                                                                                                                                                                                                                                                                                                                                                                                                                                                                                                                          | 208 | 8    | 18499 | 33.35156 | 8.13E-01 | 4.10E-02 | 4.70E+00 |
| water | GO:0045927~positive regulation of growth                           | 3  | 1.42  | 2.52E-03 | AT1G67360, AT3G05500, AT2G47780                                                                                                                                                                                                                                                                                                                                                                                                                                                                                                                                                                                                                                                                                                                                                                                                                                                                                                                                                                                                                                                                                                                                                                                                                          | 208 | 7    | 18499 | 38.11607 | 7.18E-01 | 3.19E-02 | 3.57E+00 |
| water | GO:0010117~photoprotection                                         | 3  | 1.42  | 2.52E-03 | AT4G08920, AT1G27730, AT2G05620                                                                                                                                                                                                                                                                                                                                                                                                                                                                                                                                                                                                                                                                                                                                                                                                                                                                                                                                                                                                                                                                                                                                                                                                                          | 208 | 7    | 18499 | 38.11607 | 7.18E-01 | 3.19E-02 | 3.57E+00 |
| water | GO:0071368~cellular response to cytokinin stimulus                 | 3  | 1.42  | 2.52E-03 | AT4G31920, AT3G16857, AT2G25180                                                                                                                                                                                                                                                                                                                                                                                                                                                                                                                                                                                                                                                                                                                                                                                                                                                                                                                                                                                                                                                                                                                                                                                                                          | 208 | 7    | 18499 | 38.11607 | 7.18E-01 | 3.19E-02 | 3.57E+00 |
| water | GO:0006351~transcription, DNA-templated                            | 36 | 17.06 | 1.90E-03 | AT4G31920, AT1G22810, AT1G15360, AT3G15500, AT5G27620, AT1G16060, AT4G24020, AT1G28520, AT1G52890, AT1G45249, AT1G18390, AT5G03740, AT1G69310, AT2G46400, AT1G33240, AT3G16857, AT4G25480, AT2G25180, AT3G10500, AT1G27730, AT3G23050, AT4G27410, AT5G07690, AT3G11020, AT3G20310, AT1G78080, AT3G56400, AT1G12610, AT2G38880, AT2G40750, AT1G36060, AT2G40220, AT1G69600, AT1G54160, AT5G05410, AT1G46768                                                                                                                                                                                                                                                                                                                                                                                                                                                                                                                                                                                                                                                                                                                                                                                                                                               | 208 | 1886 | 18499 | 1.697641 | 6.15E-01 | 2.48E-02 | 2.71E+00 |
| water | GO:2000377~regulation of reactive oxygen species metabolic process | 4  | 1.90  | 1.58E-03 | AT4G08920, AT3G10500, AT4G33950, AT1G32230                                                                                                                                                                                                                                                                                                                                                                                                                                                                                                                                                                                                                                                                                                                                                                                                                                                                                                                                                                                                                                                                                                                                                                                                               | 208 | 21   | 18499 | 16.94048 | 5.48E-01 | 2.18E-02 | 2.26E+00 |
| water | GO:0010119~regulation of stomatal movement                         | 5  | 2.37  | 1.58E-03 | AT2G18960, AT2G40220, AT2G31470, AT5G27620, AT4G33950                                                                                                                                                                                                                                                                                                                                                                                                                                                                                                                                                                                                                                                                                                                                                                                                                                                                                                                                                                                                                                                                                                                                                                                                    | 208 | 45   | 18499 | 9.881944 | 5.48E-01 | 2.12E-02 | 2.26E+00 |
| water | GO:0042742~defense response to bacterium                           | 11 | 5.21  | 1.13E-03 | AT4G39090, AT3G46930, AT1G33560, AT3G30775, AT3G56400, AT4G26070, AT1G02205, AT5G11270, AT3G16640, AT4G33950, AT4G18780                                                                                                                                                                                                                                                                                                                                                                                                                                                                                                                                                                                                                                                                                                                                                                                                                                                                                                                                                                                                                                                                                                                                  | 208 | 276  | 18499 | 3.544611 | 4.34E-01 | 1.61E-02 | 1.62E+00 |
| water | GO:0010029~regulation of seed germination                          | 5  | 2.37  | 1.02E-03 | AT1G20450, AT3G63060, AT3G50500, AT3G54770, AT5G66880                                                                                                                                                                                                                                                                                                                                                                                                                                                                                                                                                                                                                                                                                                                                                                                                                                                                                                                                                                                                                                                                                                                                                                                                    | 208 | 40   | 18499 | 11.11719 | 3.99E-01 | 1.49E-02 | 1.45E+00 |
| water | GO:0048316~seed development                                        | 6  | 2.84  | 9.84E-04 | AT1G32560, AT5G05860, AT2G35300, AT2G40220, AT1G54160, AT5G06760                                                                                                                                                                                                                                                                                                                                                                                                                                                                                                                                                                                                                                                                                                                                                                                                                                                                                                                                                                                                                                                                                                                                                                                         | 208 | 68   | 18499 | 7.847426 | 3.89E-01 | 1.48E-02 | 1.41E+00 |
| water | GO:0045892~negative regulation of transcription, DNA-templated     | 8  | 3.79  | 7.86E-04 | AT3G61050, AT5G663980, AT5G03740, AT1G33240, AT3G20310, AT3G56400, AT1G27730, AT1G54160                                                                                                                                                                                                                                                                                                                                                                                                                                                                                                                                                                                                                                                                                                                                                                                                                                                                                                                                                                                                                                                                                                                                                                  | 208 | 134  | 18499 | 5.309701 | 3.25E-01 | 1.22E-02 | 1.13E+00 |
| water | GO:0015840~urea transport                                          | 3  | 1.42  | 7.37E-04 | AT3G16240, AT2G36830, AT4G01470                                                                                                                                                                                                                                                                                                                                                                                                                                                                                                                                                                                                                                                                                                                                                                                                                                                                                                                                                                                                                                                                                                                                                                                                                          | 208 | 4    | 18499 | 66.70313 | 3.09E-01 | 1.18E-02 | 1.06E+00 |
| water | GO:0009688~abscisic acid biosynthetic process                      | 4  | 1.90  | 5.69E-04 | AT1G30100, AT5G67030, AT3G14440, AT1G52340                                                                                                                                                                                                                                                                                                                                                                                                                                                                                                                                                                                                                                                                                                                                                                                                                                                                                                                                                                                                                                                                                                                                                                                                               | 208 | 15   | 18499 | 23.71667 | 2.48E-01 | 9.78E-03 | 8.16E-01 |
| water | GO:0006810~transport                                               | 13 | 6.16  | 5.89E-04 | AT2G37170, AT2G37180, AT3G54820, AT3G16240, AT4G35100, AT2G45960, AT4G00430, AT3G53420, AT3G61430, AT2G36830, AT3G04090, AT1G01620, AT4G01470                                                                                                                                                                                                                                                                                                                                                                                                                                                                                                                                                                                                                                                                                                                                                                                                                                                                                                                                                                                                                                                                                                            | 208 | 349  | 18499 | 3.312858 | 2.55E-01 | 9.78E-03 | 8.44E-01 |
| water | GO:0006979~response to oxidative stress                            | 12 | 5.69  | 4.55E-04 | AT3G62770, AT1G76080, AT3G46930, AT2G39800, AT3G30775, AT2G37040, AT1G27730, AT3G12490, AT3G22380, AT2G31870, AT2G40880, AT1G32230                                                                                                                                                                                                                                                                                                                                                                                                                                                                                                                                                                                                                                                                                                                                                                                                                                                                                                                                                                                                                                                                                                                       | 208 | 291  | 18499 | 3.667526 | 2.04E-01 | 8.41E-03 | 6.54E-01 |
| water | GO:0090332~stomatal closure                                        | 4  | 1.90  | 4.59E-04 | AT5G64010, AT1G12480, AT5G56030, AT2G31870                                                                                                                                                                                                                                                                                                                                                                                                                                                                                                                                                                                                                                                                                                                                                                                                                                                                                                                                                                                                                                                                                                                                                                                                               | 208 | 14   | 18499 | 25.41071 | 2.05E-01 | 8.18E-03 | 6.59E-01 |

|       |                                                                             |    |       |          |                                                                                                                                                                                                                                                                                                                                                                                                                                                                                         |     |     |       |          |          |          |          |
|-------|-----------------------------------------------------------------------------|----|-------|----------|-----------------------------------------------------------------------------------------------------------------------------------------------------------------------------------------------------------------------------------------------------------------------------------------------------------------------------------------------------------------------------------------------------------------------------------------------------------------------------------------|-----|-----|-------|----------|----------|----------|----------|
| water | GO:0031537~regulation of anthocyanin metabolic process                      | 3  | 1.42  | 3.71E-04 | AT4G31920, AT3G16857, AT2G25180                                                                                                                                                                                                                                                                                                                                                                                                                                                         | 208 | 3   | 18499 | 88.9375  | 1.70E-01 | 7.13E-03 | 5.33E-01 |
| water | GO:0009790~embryo development                                               | 3  | 1.42  | 3.71E-04 | AT1G32560, AT2G35300, AT5G06760                                                                                                                                                                                                                                                                                                                                                                                                                                                         | 208 | 3   | 18499 | 88.9375  | 1.70E-01 | 7.13E-03 | 5.33E-01 |
| water | GO:0080148~negative regulation of response to water deprivation             | 3  | 1.42  | 3.71E-04 | AT3G01650, AT5G14420, AT1G10370                                                                                                                                                                                                                                                                                                                                                                                                                                                         | 208 | 3   | 18499 | 88.9375  | 1.70E-01 | 7.13E-03 | 5.33E-01 |
| water | GO:0010182~sugar mediated signaling pathway                                 | 5  | 2.37  | 3.32E-04 | AT2G40220, AT3G26090, AT5G67030, AT1G52340, AT2G20890                                                                                                                                                                                                                                                                                                                                                                                                                                   | 208 | 30  | 18499 | 14.82292 | 1.53E-01 | 6.64E-03 | 4.77E-01 |
| water | GO:0045893~positive regulation of transcription, DNA-templated              | 11 | 5.21  | 1.72E-04 | AT5G09410, AT3G11020, AT3G05700, AT2G40220, AT3G10500, AT4G27410, AT1G69600, AT1G28520, AT5G05410, AT1G46768, AT1G45249                                                                                                                                                                                                                                                                                                                                                                 | 208 | 217 | 18499 | 4.508353 | 8.26E-02 | 3.58E-03 | 2.47E-01 |
| water | GO:0010200~response to chitin                                               | 9  | 4.27  | 1.27E-04 | AT5G59550, AT2G46400, AT3G23250, AT3G53600, AT3G46620, AT3G56400, AT3G52450, AT2G35930, AT1G27730                                                                                                                                                                                                                                                                                                                                                                                       | 208 | 133 | 18499 | 6.018327 | 6.18E-02 | 2.77E-03 | 1.83E-01 |
| water | GO:0050826~response to freezing                                             | 5  | 2.37  | 7.85E-05 | AT5G63980, AT5G09410, AT5G60410, AT1G12610, AT2G42540                                                                                                                                                                                                                                                                                                                                                                                                                                   | 208 | 21  | 18499 | 21.1756  | 3.86E-02 | 1.87E-03 | 1.13E-01 |
| water | GO:0009408~response to heat                                                 | 10 | 4.74  | 8.12E-05 | AT5G57050, AT1G12610, AT5G67030, AT3G06010, AT5G56030, AT2G04030, AT1G28520, AT1G05850, AT5G05410, AT1G52340                                                                                                                                                                                                                                                                                                                                                                            | 208 | 160 | 18499 | 5.558594 | 3.99E-02 | 1.85E-03 | 1.17E-01 |
| water | GO:0009788~negative regulation of abscisic acid-activated signaling pathway | 6  | 2.84  | 7.06E-05 | AT5G57050, AT2G39550, AT2G31470, AT1G08720, AT5G40280, AT3G59380                                                                                                                                                                                                                                                                                                                                                                                                                        | 208 | 39  | 18499 | 13.68269 | 3.48E-02 | 1.77E-03 | 1.02E-01 |
| water | GO:0009631~cold acclimation                                                 | 7  | 3.32  | 2.16E-05 | AT1G20450, AT4G25480, AT3G14080, AT1G20440, AT1G19120, AT1G28520, AT2G42540                                                                                                                                                                                                                                                                                                                                                                                                             | 208 | 51  | 18499 | 12.20711 | 1.08E-02 | 5.70E-04 | 3.11E-02 |
| water | GO:0010107~potassium ion import                                             | 4  | 1.90  | 1.36E-05 | AT5G47100, AT2G26650, AT1G30270, AT4G17615                                                                                                                                                                                                                                                                                                                                                                                                                                              | 208 | 5   | 18499 | 71.15    | 6.78E-03 | 3.78E-04 | 1.96E-02 |
| water | GO:0042631~cellular response to water deprivation                           | 6  | 2.84  | 1.10E-05 | AT1G18390, AT1G33240, AT5G05860, AT2G43350, AT2G31470, AT3G28270                                                                                                                                                                                                                                                                                                                                                                                                                        | 208 | 27  | 18499 | 19.76389 | 5.52E-03 | 3.25E-04 | 1.59E-02 |
| water | GO:0009873~ethylene-activated signaling pathway                             | 12 | 5.69  | 5.66E-06 | AT1G36060, AT1G22810, AT3G20310, AT2G40220, AT1G78080, AT1G15360, AT1G08720, AT1G16060, AT4G18780, AT1G05850, AT1G46768, AT1G32230                                                                                                                                                                                                                                                                                                                                                      | 208 | 179 | 18499 | 5.962291 | 2.83E-03 | 1.77E-04 | 8.15E-03 |
| water | GO:0010286~heat acclimation                                                 | 7  | 3.32  | 3.74E-06 | AT3G11020, AT5G60410, AT5G44650, AT1G20440, AT5G56030, AT5G05410, AT2G42540                                                                                                                                                                                                                                                                                                                                                                                                             | 208 | 38  | 18499 | 16.38322 | 1.87E-03 | 1.25E-04 | 5.39E-03 |
| water | GO:1902584~positive regulation of response to water deprivation             | 5  | 2.37  | 1.03E-06 | AT5G58787, AT1G67360, AT2G42620, AT3G05500, AT2G47780                                                                                                                                                                                                                                                                                                                                                                                                                                   | 208 | 8   | 18499 | 55.58594 | 5.16E-04 | 3.68E-05 | 1.48E-03 |
| water | GO:0009409~response to cold                                                 | 18 | 8.53  | 4.73E-08 | AT1G20450, AT5G08620, AT5G09410, AT1G78080, AT1G20440, AT4G17615, AT2G42540, AT2G40880, AT5G06760, AT5G63980, AT4G25480, AT3G22310, AT5G52440, AT1G27730, AT3G12490, AT4G24190, AT3G50310, AT1G46768                                                                                                                                                                                                                                                                                    | 208 | 299 | 18499 | 5.354097 | 2.37E-05 | 1.82E-06 | 6.81E-05 |
| water | GO:0051865~protein autoubiquitination                                       | 7  | 3.32  | 5.09E-09 | AT1G06770, AT5G59550, AT2G30580, AT3G46620, AT3G52450, AT2G35930, AT3G12630                                                                                                                                                                                                                                                                                                                                                                                                             | 208 | 14  | 18499 | 44.46875 | 2.55E-06 | 2.12E-07 | 7.33E-06 |
| water | GO:0009819~drought recovery                                                 | 7  | 3.32  | 1.27E-11 | AT3G20250, AT3G10500, AT2G37040, AT1G70670, AT3G16640, AT1G07240, AT2G42540                                                                                                                                                                                                                                                                                                                                                                                                             | 208 | 7   | 18499 | 88.9375  | 6.34E-09 | 5.77E-10 | 1.82E-08 |
| water | GO:0009738~abscisic acid-activated signaling pathway                        | 20 | 9.48  | 7.06E-13 | AT3G29320, AT2G17820, AT2G43350, AT2G31470, AT5G11270, AT3G63060, AT4G33950, AT4G17615, AT5G66880, AT1G45249, AT5G59550, AT5G63980, AT5G57050, AT5G47100, AT2G40220, AT1G12480, AT3G46620, AT1G08720, AT3G50500, AT1G54160                                                                                                                                                                                                                                                              | 208 | 195 | 18499 | 9.121795 | 3.54E-10 | 3.54E-11 | 1.02E-09 |
| water | GO:0010118~stomatal movement                                                | 11 | 5.21  | 4.12E-13 | AT5G47100, AT4G08920, AT1G30270, AT2G31470, AT1G12480, AT5G11270, AT4G24020, AT2G47800, AT4G33950, AT4G17615, AT1G04400                                                                                                                                                                                                                                                                                                                                                                 | 208 | 29  | 18499 | 33.73491 | 2.06E-10 | 2.29E-11 | 5.93E-10 |
| water | GO:2000070~regulation of response to water deprivation                      | 9  | 4.27  | 3.44E-14 | AT5G52050, AT5G60410, AT2G41225, AT5G52440, AT4G14300, AT5G27620, AT2G41230, AT4G05590, AT2G20890                                                                                                                                                                                                                                                                                                                                                                                       | 208 | 11  | 18499 | 72.76705 | 1.72E-11 | 2.16E-12 | 4.96E-11 |
| water | GO:0034220~ion transmembrane transport                                      | 13 | 6.16  | 7.17E-17 | AT2G37170, AT2G37180, AT3G54820, AT4G35100, AT2G45960, AT5G18290, AT4G00430, AT3G61430, AT2G36830, AT3G04090, AT1G01620, AT4G01470                                                                                                                                                                                                                                                                                                                                                      | 208 | 28  | 18499 | 41.29241 | 5.56E-14 | 7.99E-15 | 1.55E-13 |
| water | GO:0009992~cellular water homeostasis                                       | 15 | 7.11  | 1.48E-18 | AT2G37170, AT2G37180, AT3G54820, AT3G16240, AT4G35100, AT2G45960, AT5G18290, AT4G00430, AT3G53420, AT1G21270, AT3G61430, AT2G36830, AT3G04090, AT1G01620, AT4G01470                                                                                                                                                                                                                                                                                                                     | 208 | 37  | 18499 | 36.05574 | 7.43E-16 | 1.24E-16 | 2.14E-15 |
| water | GO:0006833~water transport                                                  | 11 | 5.21  | 2.69E-19 | AT2G37170, AT3G53420, AT3G54820, AT3G16240, AT3G61430, AT2G36830, AT1G01620, AT2G45960, AT3G24715, AT4G01470, AT4G00430                                                                                                                                                                                                                                                                                                                                                                 | 208 | 11  | 18499 | 88.9375  | 1.35E-16 | 2.70E-17 | 3.88E-16 |
| water | GO:0009651~response to salt stress                                          | 43 | 20.38 | 1.60E-25 | AT1G74920, AT3G62770, AT1G16060, AT2G04030, AT2G45960, AT5G66880, AT1G45249, AT1G32230, AT3G61050, AT5G63980, AT5G03740, AT5G62470, AT3G46930, AT2G26650, AT1G02730, AT1G69310, AT3G05700, AT3G22310, AT1G27730, AT3G50500, AT3G50310, AT1G05850, AT5G08620, AT2G39800, AT1G78080, AT1G12610, AT3G06010, AT3G63060, AT4G33950, AT5G56030, AT3G51920, AT4G17615, AT3G54770, AT4G01420, AT2G42540, AT4G39090, AT5G25370, AT3G20250, AT1G15690, AT3G23250, AT3G47600, AT4G24190, AT1G10370 | 208 | 484 | 18499 | 7.901472 | 8.04E-23 | 2.01E-23 | 2.31E-22 |
| water | GO:0006970~response to osmotic stress                                       | 28 | 13.27 | 1.24E-27 | AT3G62770, AT4G18780, AT5G66880, AT1G32230, AT1G32560, AT1G02730,                                                                                                                                                                                                                                                                                                                                                                                                                       | 208 | 122 | 18499 | 20.41189 | 6.23E-25 | 2.08E-25 | 1.79E-24 |

|                    |                                           |     |       |           |                                                                                                                                                                                                                                                                                                                                                                                                                                                                                                                                                                                                                                                                                                                                                                                                                                                                                                                                                                                                                                                                                                                                                                                                                                                                                                                                                                                                                                                                                                                                                                                                                          |     |      |       |          |           |           |           |  |
|--------------------|-------------------------------------------|-----|-------|-----------|--------------------------------------------------------------------------------------------------------------------------------------------------------------------------------------------------------------------------------------------------------------------------------------------------------------------------------------------------------------------------------------------------------------------------------------------------------------------------------------------------------------------------------------------------------------------------------------------------------------------------------------------------------------------------------------------------------------------------------------------------------------------------------------------------------------------------------------------------------------------------------------------------------------------------------------------------------------------------------------------------------------------------------------------------------------------------------------------------------------------------------------------------------------------------------------------------------------------------------------------------------------------------------------------------------------------------------------------------------------------------------------------------------------------------------------------------------------------------------------------------------------------------------------------------------------------------------------------------------------------------|-----|------|-------|----------|-----------|-----------|-----------|--|
|                    |                                           |     |       |           | AT1G69310, AT3G46930, AT3G50500, AT2G31870, AT2G17820, AT2G37180, AT1G78080, AT1G20440, AT3G12630, AT3G63060, AT4G33950, AT4G17615, AT4G01420, AT2G42540, AT5G06760, AT4G39090, AT5G57050, AT2G35300, AT3G20250, AT2G40220, AT5G67030, AT3G14440                                                                                                                                                                                                                                                                                                                                                                                                                                                                                                                                                                                                                                                                                                                                                                                                                                                                                                                                                                                                                                                                                                                                                                                                                                                                                                                                                                         |     |      |       |          |           |           |           |  |
| water              | GO:0009737~response to abscisic acid      | 45  | 21.33 | 2.30E-31  | AT1G20450, AT2G37170, AT5G48870, AT2G31470, AT3G26090, AT4G35100, AT5G11270, AT1G16060, AT3G22380, AT5G66880, AT1G17950, AT1G45249, AT5G59550, AT3G53420, AT5G03740, AT5G62470, AT3G46930, AT3G19600, AT3G05700, AT3G46620, AT5G08490, AT1G27730, AT4G27410, AT5G40280, AT3G18490, AT3G50500, AT2G18960, AT2G39800, AT3G20310, AT2G39550, AT1G20440, AT1G70670, AT3G63060, AT4G33950, AT3G51920, AT3G54770, AT2G42540, AT4G23450, AT5G57050, AT5G52050, AT5G25370, AT1G13740, AT1G12480, AT3G47600, AT1G80710                                                                                                                                                                                                                                                                                                                                                                                                                                                                                                                                                                                                                                                                                                                                                                                                                                                                                                                                                                                                                                                                                                            | 208 | 394  | 18499 | 10.15784 | 1.15E-28  | 5.77E-29  | 3.32E-28  |  |
| water              | GO:0009414~response to water deprivation  | 142 | 67.30 | 2.16E-221 | AT1G74920, AT1G20450, AT2G37170, AT4G31920, AT1G15360, AT3G52450, AT1G11755, AT1G16060, AT1G52890, AT1G45249, AT5G63980, AT3G61050, AT5G47100, AT4G25480, AT3G16857, AT5G45340, AT1G27730, AT3G18490, AT3G50310, AT3G50500, AT5G07690, AT1G04400, AT4G24275, AT3G29320, AT2G37180, AT3G11020, AT2G30580, AT1G78080, AT2G39550, AT5G13780, AT4G17615, AT4G39090, AT1G06770, AT3G61430, AT3G30775, AT1G52340, AT4G34890, AT4G08920, AT2G31470, AT1G28520, AT5G66880, AT1G76080, AT3G45140, AT3G46930, AT5G08490, AT1G01620, AT5G40280, AT1G05850, AT3G59380, AT2G31870, AT2G33230, AT5G64010, AT2G17820, AT3G20310, AT2G39800, AT1G20440, AT3G63060, AT2G38880, AT4G33950, AT1G47128, AT5G08120, AT5G60410, AT1G15690, AT5G67030, AT1G69600, AT3G56580, AT4G24190, AT1G58440, AT3G14080, AT5G27620, AT5G11270, AT3G22380, AT2G04030, AT4G18780, AT2G40880, AT4G00430, AT5G06530, AT5G03740, AT5G13750, AT5G62470, AT3G05700, AT1G33240, AT2G25180, AT3G46620, AT3G23050, AT2G18960, AT2G29130, AT1G12610, AT2G35930, AT2G47800, AT5G56030, AT3G51920, AT5G57050, AT2G35300, AT1G13740, AT2G40220, AT1G08720, AT3G12490, AT1G19120, AT1G80710, AT1G80410, AT5G05410, AT1G46768, AT3G62770, AT5G48870, AT3G26090, AT1G33560, AT3G15500, AT4G26070, AT4G24020, AT2G45960, AT2G42620, AT1G32230, AT5G59550, AT3G53420, AT1G32560, AT1G69310, AT1G02730, AT2G26650, AT3G19600, AT5G44650, AT3G22310, AT1G30100, AT4G27410, AT1G05180, AT3G46970, AT5G08620, AT1G30270, AT4G34100, AT3G06010, AT1G02205, AT3G12630, AT3G54770, AT4G01420, AT2G42540, AT4G23450, AT5G06760, AT5G25370, AT3G14440, AT1G12110, AT2G05620, AT1G54160 | 208 | 279  | 18499 | 45.26568 | 1.08E-218 | 1.08E-218 | 3.12E-218 |  |
| Cellular component |                                           |     |       |           |                                                                                                                                                                                                                                                                                                                                                                                                                                                                                                                                                                                                                                                                                                                                                                                                                                                                                                                                                                                                                                                                                                                                                                                                                                                                                                                                                                                                                                                                                                                                                                                                                          |     |      |       |          |           |           |           |  |
| cold               | GO:0009535~chloroplast thylakoid membrane | 10  | 6.94  | 4.26E-04  | AT3G52150, AT5G52440, AT2G33800, AT1G77490, AT1G29395, AT4G24770, AT1G29390, AT2G37230, AT2G01918, AT4G39730                                                                                                                                                                                                                                                                                                                                                                                                                                                                                                                                                                                                                                                                                                                                                                                                                                                                                                                                                                                                                                                                                                                                                                                                                                                                                                                                                                                                                                                                                                             | 139 | 407  | 25147 | 4.445053 | 3.60E-02  | 1.22E-02  | 4.59E-01  |  |
| cold               | GO:0009507~chloroplast                    | 38  | 26.39 | 3.54E-04  | AT3G08920, AT3G52150, AT2G33800, AT4G28210, AT1G01860, AT1G70200, AT2G42530, AT3G53460, AT1G05140, AT5G63980, AT3G11170, AT1G74960, AT5G62390, AT5G10450, AT5G52440, AT2G21660, AT5G38480, AT1G56070, AT5G50950, AT1G74710, AT1G77490, AT5G65430, AT5G52370, AT2G38170, AT1G10760, AT1G20823, AT5G23070, AT1G29395, AT3G06510, AT2G42540, AT2G36530, AT5G15090, AT4G24770, AT3G22690, AT3G20930, AT3G55160, AT4G39730, AT2G01918                                                                                                                                                                                                                                                                                                                                                                                                                                                                                                                                                                                                                                                                                                                                                                                                                                                                                                                                                                                                                                                                                                                                                                                         | 139 | 3855 | 25147 | 1.783325 | 3.00E-02  | 1.51E-02  | 3.82E-01  |  |
| cold               | GO:0009941~chloroplast envelope           | 14  | 9.72  | 9.71E-06  | AT3G08920, AT3G52150, AT4G31690, AT1G10760, AT2G19450, AT1G29395, AT3G06510, AT2G42530, AT2G42540, AT1G29390, AT3G11170, AT5G15090, AT5G52440, AT4G24770                                                                                                                                                                                                                                                                                                                                                                                                                                                                                                                                                                                                                                                                                                                                                                                                                                                                                                                                                                                                                                                                                                                                                                                                                                                                                                                                                                                                                                                                 | 139 | 543  | 25147 | 4.664441 | 8.35E-04  | 8.35E-04  | 1.05E-02  |  |
| heat               | GO:0005635~nuclear envelope               | 4   | 3.92  | 3.35E-03  | AT3G53110, AT5G61780, AT5G07350, AT3G10800                                                                                                                                                                                                                                                                                                                                                                                                                                                                                                                                                                                                                                                                                                                                                                                                                                                                                                                                                                                                                                                                                                                                                                                                                                                                                                                                                                                                                                                                                                                                                                               | 101 | 75   | 25147 | 13.27894 | 2.30E-01  | 4.27E-02  | 3.49E+00  |  |

|       |                                                |    |       |          |                                                                                                                                                                                                                                                                                                                                                                                                                                                                                                                                                                                                                                                                                                                                                       |     |      |       |          |          |          |          |
|-------|------------------------------------------------|----|-------|----------|-------------------------------------------------------------------------------------------------------------------------------------------------------------------------------------------------------------------------------------------------------------------------------------------------------------------------------------------------------------------------------------------------------------------------------------------------------------------------------------------------------------------------------------------------------------------------------------------------------------------------------------------------------------------------------------------------------------------------------------------------------|-----|------|-------|----------|----------|----------|----------|
| heat  |                                                |    |       |          | AT4G11260, AT4G29770, AT5G47910, AT4G26850, AT2G16575, AT1G64280, AT5G63870, AT5G07100, AT5G21160, AT3G09350, AT3G06400, AT1G03190, AT5G16820, AT2G20880, AT1G12610, AT1G79350, AT4G21320, AT3G47220, AT4G15802, AT1G21760, AT4G38630, AT5G05410, AT5G59820, AT3G53110, AT3G24320, AT1G64520, AT3G28030, AT1G17780, AT1G54490, AT2G21320, AT5G03280, AT1G28520, AT3G25230, AT4G12400, AT2G26150, AT4G29040, AT1G73130, AT2G17690, AT4G26080, AT2G38470, AT5G02500, AT3G16770, AT4G26840, AT2G30250, AT5G17020, AT3G06010, AT2G46020, AT5G42020, AT5G60410, AT1G74310, AT4G19020, AT2G39770, AT5G53060, AT5G48570, AT3G10800                                                                                                                           | 101 | 9796 | 25147 | 1.397908 | 1.17E-01 | 2.45E-02 | 1.67E+00 |
|       | GO:0005634~nucleus                             | 55 | 53.92 | 1.59E-03 |                                                                                                                                                                                                                                                                                                                                                                                                                                                                                                                                                                                                                                                                                                                                                       |     |      |       |          |          |          |          |
| heat  | GO:0000932~cytoplasmic mRNA processing body    | 4  | 3.92  | 1.11E-03 | AT5G21160, AT5G61780, AT1G54490, AT5G07350                                                                                                                                                                                                                                                                                                                                                                                                                                                                                                                                                                                                                                                                                                            | 101 | 51   | 25147 | 19.52786 | 8.27E-02 | 2.14E-02 | 1.16E+00 |
| heat  | GO:0010494~cytoplasmic stress granule          | 4  | 3.92  | 7.70E-05 | AT5G21160, AT5G61780, AT1G54490, AT5G07350                                                                                                                                                                                                                                                                                                                                                                                                                                                                                                                                                                                                                                                                                                            | 101 | 21   | 25147 | 47.4248  | 5.99E-03 | 2.00E-03 | 8.15E-02 |
| heat  |                                                |    |       |          | AT4G11260, AT3G53110, AT4G29770, AT4G26850, AT5G43940, AT1G28520, AT3G25230, AT5G63870, AT1G64280, AT4G12400, AT5G21160, AT2G26150, AT3G09350, AT4G04950, AT4G29040, AT3G17880, AT3G53990, AT2G17690, AT5G42980, AT4G26080, AT5G16820, AT5G02500, AT3G16770, AT5G56010, AT1G16540, AT4G26840, AT2G20880, AT5G17020, AT5G53400, AT5G58070, AT1G74310, AT2G39770, AT5G61780, AT5G07350, AT1G21760, AT4G38630, AT5G10010, AT3G10800, AT1G71790                                                                                                                                                                                                                                                                                                           | 101 | 4407 | 25147 | 2.203365 | 7.36E-05 | 3.68E-05 | 9.98E-04 |
|       | GO:0005737~cytoplasm                           | 39 | 38.24 | 9.43E-07 |                                                                                                                                                                                                                                                                                                                                                                                                                                                                                                                                                                                                                                                                                                                                                       |     |      |       |          |          |          |          |
| heat  |                                                |    |       |          | AT4G11260, AT3G53110, AT1G64520, AT5G43940, AT1G54490, AT3G25230, AT5G21160, AT4G04950, AT3G06400, AT4G29040, AT5G62390, AT5G42980, AT5G02500, AT5G56010, AT4G26840, AT5G17020, AT1G79350, AT2G46020, AT5G42020, AT1G50500, AT5G53400, AT5G58070, AT1G74310, AT5G61780, AT2G39770, AT4G15802, AT5G07350, AT4G38630, AT1G52340                                                                                                                                                                                                                                                                                                                                                                                                                         | 101 | 2309 | 25147 | 3.127079 | 4.26E-06 | 4.26E-06 | 5.78E-05 |
|       | GO:0005829~cytosol                             | 29 | 28.43 | 5.46E-08 |                                                                                                                                                                                                                                                                                                                                                                                                                                                                                                                                                                                                                                                                                                                                                       |     |      |       |          |          |          |          |
| light | GO:0030076~light-harvesting complex            | 3  | 2.11  | 5.40E-03 | AT2G05100, AT2G05070, AT3G27690                                                                                                                                                                                                                                                                                                                                                                                                                                                                                                                                                                                                                                                                                                                       | 140 | 20   | 25147 | 26.94321 | 3.37E-01 | 3.37E-02 | 5.54E+00 |
| light |                                                |    |       |          | AT2G05100, AT3G62030, AT4G37270, AT5G64940, AT2G05070, AT5G58070, AT3G27690, AT1G55480, AT4G13670, AT5G58140                                                                                                                                                                                                                                                                                                                                                                                                                                                                                                                                                                                                                                          | 140 | 543  | 25147 | 3.307945 | 2.21E-01 | 2.25E-02 | 3.40E+00 |
|       | GO:0009941~chloroplast envelope                | 10 | 7.04  | 3.29E-03 |                                                                                                                                                                                                                                                                                                                                                                                                                                                                                                                                                                                                                                                                                                                                                       |     |      |       |          |          |          |          |
| light | GO:0009534~chloroplast thylakoid               | 7  | 4.93  | 1.02E-03 | AT5G16400, AT2G05070, AT1G55480, AT4G13670, AT2G05620, AT1G03600, AT3G02730                                                                                                                                                                                                                                                                                                                                                                                                                                                                                                                                                                                                                                                                           | 140 | 206  | 25147 | 6.103641 | 7.48E-02 | 7.75E-03 | 1.07E+00 |
| light |                                                |    |       |          | AT2G05100, AT3G62030, AT4G22260, AT2G05070, AT3G27690, AT1G55480, AT1G03600                                                                                                                                                                                                                                                                                                                                                                                                                                                                                                                                                                                                                                                                           | 140 | 206  | 25147 | 6.103641 | 7.48E-02 | 7.75E-03 | 1.07E+00 |
|       | GO:0009579~thylakoid                           | 7  | 4.93  | 1.02E-03 |                                                                                                                                                                                                                                                                                                                                                                                                                                                                                                                                                                                                                                                                                                                                                       |     |      |       |          |          |          |          |
| light | GO:0010287~plastoglobule                       | 5  | 3.52  | 8.02E-04 | AT2G05100, AT4G31390, AT2G05070, AT3G27690, AT1G79600                                                                                                                                                                                                                                                                                                                                                                                                                                                                                                                                                                                                                                                                                                 | 140 | 75   | 25147 | 11.97476 | 5.91E-02 | 7.59E-03 | 8.40E-01 |
| light | GO:0009898~cytoplasmic side of plasma membrane | 3  | 2.11  | 8.31E-04 | AT3G45780, AT5G58070, AT5G58140                                                                                                                                                                                                                                                                                                                                                                                                                                                                                                                                                                                                                                                                                                                       | 140 | 8    | 25147 | 67.35804 | 6.12E-02 | 7.00E-03 | 8.71E-01 |
| light | GO:0016605~PML body                            | 3  | 2.11  | 1.81E-04 | AT4G08920, AT2G46340, AT1G04400                                                                                                                                                                                                                                                                                                                                                                                                                                                                                                                                                                                                                                                                                                                       | 140 | 4    | 25147 | 134.7161 | 1.36E-02 | 1.96E-03 | 1.90E-01 |
| light |                                                |    |       |          | AT2G05100, AT3G62030, AT4G22260, AT2G05070, AT3G27690, AT3G47860, AT1G55480, AT4G13670, AT2G05620, AT1G03600, AT5G55280                                                                                                                                                                                                                                                                                                                                                                                                                                                                                                                                                                                                                               | 140 | 407  | 25147 | 4.854633 | 6.98E-03 | 1.17E-03 | 9.70E-02 |
|       | GO:0009535~chloroplast thylakoid membrane      | 11 | 7.75  | 9.22E-05 |                                                                                                                                                                                                                                                                                                                                                                                                                                                                                                                                                                                                                                                                                                                                                       |     |      |       |          |          |          |          |
| light |                                                |    |       |          | AT3G21150, AT4G16250, AT1G09570, AT1G10470, AT5G63980, AT1G20090, AT3G45780, AT2G24790, AT1G42550, AT3G04110, AT3G48100, AT1G59940, AT5G58140, AT4G17490, AT2G18790                                                                                                                                                                                                                                                                                                                                                                                                                                                                                                                                                                                   | 140 | 634  | 25147 | 4.249718 | 8.94E-04 | 1.79E-04 | 1.24E-02 |
|       | GO:0005622~intracellular                       | 15 | 10.56 | 1.18E-05 |                                                                                                                                                                                                                                                                                                                                                                                                                                                                                                                                                                                                                                                                                                                                                       |     |      |       |          |          |          |          |
| light |                                                |    |       |          | AT5G61270, AT1G07350, AT2G46340, AT5G02200, AT2G18790, AT1G09570, AT4G25560                                                                                                                                                                                                                                                                                                                                                                                                                                                                                                                                                                                                                                                                           | 140 | 70   | 25147 | 17.96214 | 1.91E-04 | 6.36E-05 | 2.64E-03 |
|       | GO:0016607~nuclear speck                       | 7  | 4.93  | 2.51E-06 |                                                                                                                                                                                                                                                                                                                                                                                                                                                                                                                                                                                                                                                                                                                                                       |     |      |       |          |          |          |          |
| light |                                                |    |       |          | AT2G21150, AT4G18290, AT1G26260, AT1G21970, AT3G21150, AT4G16250, AT2G36890, AT5G43630, AT4G28860, AT1G05630, AT1G10120, AT5G27620, AT4G14110, AT2G36990, AT5G63870, AT1G09570, AT2G21650, AT1G22770, AT5G63980, AT1G68050, AT1G20090, AT4G27430, AT4G36930, AT3G59220, AT5G48560, AT1G59940, AT2G46260, AT5G58140, AT1G10170, AT5G07690, AT2G18790, AT1G04400, AT5G49230, AT2G37678, AT1G53090, AT5G57360, AT2G46590, AT1G09530, AT1G25540, AT4G34530, AT2G36530, AT4G25560, AT5G64330, AT5G28490, AT5G20730, AT4G28610, AT4G15090, AT5G59820, AT1G26945, AT4G28880, AT2G20180, AT4G08920, AT2G43010, AT2G21320, AT2G42620, AT3G02790, AT4G01120, AT3G05420, AT3G45780, AT3G61850, AT2G24790, AT4G40060, AT1G78370, AT3G54610, AT1G26830, AT2G46340, | 140 | 9796 | 25147 | 1.521905 | 1.01E-04 | 5.03E-05 | 1.39E-03 |
|       | GO:0005634~nucleus                             | 83 | 58.45 | 1.32E-06 |                                                                                                                                                                                                                                                                                                                                                                                                                                                                                                                                                                                                                                                                                                                                                       |     |      |       |          |          |          |          |

|           |                                  |    |       |          |                                                                                                                                                                                                                                                                                                                                                                                                                                                                                                                                                                                                                                                                                                                     |     |      |       |          |          |          |          |
|-----------|----------------------------------|----|-------|----------|---------------------------------------------------------------------------------------------------------------------------------------------------------------------------------------------------------------------------------------------------------------------------------------------------------------------------------------------------------------------------------------------------------------------------------------------------------------------------------------------------------------------------------------------------------------------------------------------------------------------------------------------------------------------------------------------------------------------|-----|------|-------|----------|----------|----------|----------|
|           |                                  |    |       |          | AT4G28556, AT2G40080, AT3G44450, AT2G39840, AT3G61600, AT1G70800, AT1G02340, AT5G02200, AT2G46370, AT1G10470, AT3G19820, AT5G39760, AT5G61270, AT3G48100, AT5G61230, AT4G17490, AT1G54160                                                                                                                                                                                                                                                                                                                                                                                                                                                                                                                           |     |      |       |          |          |          |          |
| light     | GO:0005737~cytoplasm             | 48 | 33.80 | 2.63E-06 | AT4G28880, AT1G26945, AT4G08920, AT3G21150, AT4G28860, AT5G27620, AT1G05630, AT4G14110, AT1G75100, AT5G55280, AT5G63870, AT4G01120, AT3G02790, AT1G09570, AT1G22770, AT1G68050, AT5G63980, AT1G20090, AT3G05420, AT2G26300, AT3G45780, AT4G38740, AT1G59940, AT2G46260, AT1G78370, AT5G58140, AT4G28556, AT2G38050, AT1G04400, AT2G37678, AT2G39840, AT3G61600, AT3G08550, AT5G57360, AT1G31812, AT2G47700, AT5G27630, AT4G40100, AT5G02200, AT2G36530, AT2G46370, AT5G17880, AT1G10470, AT5G58070, AT5G38150, AT3G48100, AT5G08560, AT3G47340                                                                                                                                                                      | 140 | 4407 | 25147 | 1.956394 | 2.00E-04 | 5.00E-05 | 2.77E-03 |
| light     | GO:0016604~nuclear body          | 6  | 4.23  | 2.82E-08 | AT2G37678, AT4G08920, AT2G46340, AT2G18790, AT1G09570, AT1G04400                                                                                                                                                                                                                                                                                                                                                                                                                                                                                                                                                                                                                                                    | 140 | 17   | 25147 | 63.3958  | 2.14E-06 | 2.14E-06 | 2.96E-05 |
| osmotic   | GO:0005886~plasma membrane       | 31 | 27.19 | 5.41E-04 | AT1G55180, AT1G27320, AT5G03280, AT1G60940, AT4G18780, AT1G65690, AT1G72180, AT5G01410, AT1G42550, AT5G45800, AT1G77120, AT3G50500, AT3G17510, AT2G17820, AT2G37180, AT2G22660, AT5G13170, AT4G04340, AT2G47900, AT4G17615, AT4G01420, AT5G58580, AT1G50500, AT5G62460, AT2G43850, AT5G19690, AT1G58200, AT5G35750, AT4G08500, AT1G15100, AT1G35720                                                                                                                                                                                                                                                                                                                                                                 | 112 | 3702 | 25147 | 1.880154 | 3.24E-02 | 8.21E-03 | 5.42E-01 |
| osmotic   | GO:0005634~nucleus               | 63 | 55.26 | 2.23E-04 | AT1G01510, AT2G01150, AT1G60940, AT5G52310, AT4G11230, AT3G58620, AT5G62090, AT3G50500, AT5G01270, AT4G25520, AT1G78290, AT4G16830, AT5G08590, AT3G56400, AT2G47900, AT2G40750, AT2G18250, AT1G10940, AT4G39090, AT2G32700, AT5G57630, AT2G40220, AT2G43790, AT4G04920, AT4G08500, AT1G35720, AT3G33520, AT1G43700, AT5G03280, AT3G25230, AT5G49450, AT5G66880, AT3G59770, AT1G32230, AT3G46930, AT1G69310, AT3G45640, AT2G21660, AT2G23030, AT5G63650, AT3G17510, AT1G55870, AT2G31870, AT3G24860, AT5G35550, AT3G54560, AT3G08730, AT2G22660, AT1G20440, AT5G24660, AT1G53300, AT3G63060, AT3G12630, AT4G33950, AT2G42580, AT4G34710, AT4G01420, AT5G58580, AT4G01370, AT4G40010, AT5G53060, AT2G35510, AT1G15100 | 112 | 9796 | 25147 | 1.443976 | 1.35E-02 | 6.77E-03 | 2.24E-01 |
| osmotic   | GO:0005737~cytoplasm             | 36 | 31.58 | 2.29E-04 | AT3G33520, AT2G01150, AT5G12030, AT4G37900, AT3G25230, AT5G66880, AT3G59770, AT1G32230, AT5G52310, AT5G01410, AT2G21660, AT3G45640, AT1G64670, AT2G23030, AT1G77120, AT5G63650, AT3G50500, AT5G01270, AT3G17510, AT1G78290, AT3G08730, AT4G16830, AT1G16540, AT5G08590, AT2G22660, AT4G33950, AT4G17615, AT4G01420, AT4G01370, AT5G62460, AT4G40010, AT5G57630, AT3G20250, AT5G08560, AT1G35910, AT1G15100                                                                                                                                                                                                                                                                                                          | 112 | 4407 | 25147 | 1.834119 | 1.39E-02 | 4.64E-03 | 2.30E-01 |
| osmotic   | GO:0005829~cytosol               | 28 | 24.56 | 1.99E-06 | AT1G01510, AT5G12030, AT1G43700, AT1G60940, AT3G25230, AT5G66880, AT1G32560, AT1G65690, AT5G01410, AT2G21660, AT1G42550, AT2G23030, AT1G77120, AT3G50500, AT1G20440, AT2G47900, AT4G33950, AT2G18250, AT1G10940, AT5G06760, AT4G01370, AT1G50500, AT2G35300, AT5G57630, AT3G20250, AT4G40010, AT3G12490, AT1G35720                                                                                                                                                                                                                                                                                                                                                                                                  | 112 | 2309 | 25147 | 2.722715 | 1.22E-04 | 1.22E-04 | 2.00E-03 |
| oxidative | GO:0005737~cytoplasm             | 39 | 25.83 | 7.16E-03 | AT2G41090, AT4G25100, AT3G06930, AT5G20140, AT3G22200, AT1G49670, AT2G19310, AT1G30460, AT1G75280, AT1G08830, AT1G32230, AT5G63980, AT3G11220, AT4G17070, AT5G01410, AT3G53990, AT3G45640, AT5G09830, AT1G14870, AT3G09640, AT4G11850, AT5G28030, AT3G11050, AT5G59880, AT5G25620, AT2G40000, AT2G39800, AT5G16990, AT1G02930, AT5G16970, AT1G09000, AT2G14170, AT1G13440, AT1G13340, AT5G58070, AT3G04120, AT1G35910, AT4G10090, AT3G06110                                                                                                                                                                                                                                                                         | 148 | 4407 | 25147 | 1.503647 | 3.82E-01 | 4.28E-02 | 7.11E+00 |
| oxidative | GO:0009570~chloroplast stroma    | 12 | 7.95  | 1.63E-03 | AT1G76080, AT5G63980, AT2G01140, AT3G62030, AT4G25100, AT4G25130, AT2G05710, AT4G03520, AT2G28190, AT1G03680, AT3G15360, AT1G35720                                                                                                                                                                                                                                                                                                                                                                                                                                                                                                                                                                                  | 148 | 653  | 25147 | 3.122429 | 1.03E-01 | 1.09E-02 | 1.66E+00 |
| oxidative | GO:0005783~endoplasmic reticulum | 13 | 8.61  | 8.97E-04 | AT1G21520, AT5G60640, AT1G09210, AT5G42000, AT1G56340, AT5G58070, AT4G04800, AT1G52760, AT1G01230,                                                                                                                                                                                                                                                                                                                                                                                                                                                                                                                                                                                                                  | 148 | 703  | 25147 | 3.142046 | 5.83E-02 | 6.66E-03 | 9.16E-01 |

|           |                                             |    |       |          |                                                                                                                                                                                                                                                                                                                                                                                                                                                                                                                                                                                            |     |      |       |          |          |          |          |
|-----------|---------------------------------------------|----|-------|----------|--------------------------------------------------------------------------------------------------------------------------------------------------------------------------------------------------------------------------------------------------------------------------------------------------------------------------------------------------------------------------------------------------------------------------------------------------------------------------------------------------------------------------------------------------------------------------------------------|-----|------|-------|----------|----------|----------|----------|
|           |                                             |    |       |          | AT3G12490, AT1G27330, AT1G07380, AT5G57345                                                                                                                                                                                                                                                                                                                                                                                                                                                                                                                                                 |     |      |       |          |          |          |          |
| oxidative | GO:0033588~Elongator holoenzyme complex     | 3  | 1.99  | 6.99E-04 | AT3G11220, AT5G13680, AT4G10090                                                                                                                                                                                                                                                                                                                                                                                                                                                                                                                                                            | 148 | 7    | 25147 | 72.8195  | 4.58E-02 | 5.84E-03 | 7.15E-01 |
| oxidative | GO:0005774~vacuolar membrane                | 12 | 7.95  | 3.25E-04 | AT5G08670, AT1G49300, AT5G60640, AT4G35000, AT1G56340, AT5G58070, AT2G05710, AT1G07380, AT3G04120, AT3G22200, AT1G35720, AT3G14990                                                                                                                                                                                                                                                                                                                                                                                                                                                         | 148 | 536  | 25147 | 3.804004 | 2.15E-02 | 3.62E-03 | 3.33E-01 |
| oxidative | GO:0009941~chloroplast envelope             | 12 | 7.95  | 3.62E-04 | AT1G76080, AT3G62030, AT4G25100, AT5G64940, AT4G35000, AT2G01980, AT5G58070, AT4G25130, AT5G20140, AT4G00290, AT1G03680, AT3G15360                                                                                                                                                                                                                                                                                                                                                                                                                                                         | 148 | 543  | 25147 | 3.754965 | 2.40E-02 | 3.46E-03 | 3.71E-01 |
| oxidative | GO:0009579~thylakoid                        | 8  | 5.30  | 2.16E-04 | AT3G62030, AT4G25100, AT1G32220, AT4G03520, AT2G28190, AT1G03680, AT3G15360, AT1G35720                                                                                                                                                                                                                                                                                                                                                                                                                                                                                                     | 148 | 206  | 25147 | 6.598531 | 1.44E-02 | 2.89E-03 | 2.22E-01 |
| oxidative | GO:0005623~cell                             | 9  | 5.96  | 1.80E-05 | AT1G76080, AT5G60640, AT3G06050, AT5G42000, AT1G01230, AT1G07380, AT4G03520, AT1G03680, AT3G15360                                                                                                                                                                                                                                                                                                                                                                                                                                                                                          | 148 | 192  | 25147 | 7.964633 | 1.21E-03 | 3.02E-04 | 1.85E-02 |
| oxidative | GO:0009507~chloroplast                      | 47 | 31.13 | 8.52E-07 | AT1G50170, AT3G62030, AT5G60640, AT4G25100, AT1G56340, AT4G11010, AT5G20140, AT1G03680, AT4G26970, AT5G08670, AT1G76080, AT4G35090, AT5G63980, AT1G31170, AT4G35000, AT4G08940, AT5G18100, AT3G09640, AT3G47860, AT3G47450, AT4G02380, AT3G11050, AT2G28190, AT4G11830, AT5G59880, AT4G03240, AT5G43750, AT3G07700, AT5G07460, AT2G01140, AT1G09210, AT2G39800, AT1G32220, AT1G52760, AT4G25130, AT2G05710, AT4G03520, AT4G00290, AT3G15360, AT1G66330, AT1G13440, AT5G64940, AT5G37510, AT3G04120, AT1G35910, AT3G14990, AT1G35720                                                        | 148 | 3855 | 25147 | 2.071562 | 5.71E-05 | 2.85E-05 | 8.74E-04 |
| oxidative | GO:0005829~cytosol                          | 34 | 22.52 | 1.09E-06 | AT4G25100, AT1G56340, AT4G11010, AT3G06930, AT1G50290, AT3G22200, AT1G08830, AT4G26970, AT1G69190, AT5G08670, AT4G35090, AT5G63980, AT5G01410, AT4G35000, AT5G09830, AT3G09640, AT2G47510, AT5G59880, AT5G47650, AT5G07460, AT1G63460, AT3G25530, AT5G16990, AT1G02930, AT2G05710, AT4G03520, AT5G13680, AT5G16970, AT1G13440, AT5G58070, AT3G12490, AT3G04120, AT1G35720, AT3G14990                                                                                                                                                                                                       | 148 | 2309 | 25147 | 2.501955 | 7.33E-05 | 2.44E-05 | 1.12E-03 |
| oxidative | GO:0005739~mitochondrion                    | 52 | 34.44 | 5.99E-11 | AT5G60640, AT4G25100, AT2G21195, AT1G49670, AT2G24150, AT1G69190, AT5G08670, AT3G16890, AT4G35090, AT5G63980, AT3G06050, AT4G35000, AT2G47510, AT4G02380, AT4G03240, AT5G59880, AT2G01140, AT4G02580, AT3G25530, AT1G32220, AT1G01230, AT2G21640, AT2G14170, AT5G58070, AT1G35720, AT3G10930, AT3G62030, AT1G56340, AT5G42000, AT4G11010, AT1G50290, AT3G22200, AT4G26970, AT1G31170, AT5G19875, AT3G47450, AT3G14430, AT5G18040, AT2G40000, AT1G09210, AT2G39800, AT4G25130, AT1G27330, AT1G02930, AT2G05710, AT4G00290, AT3G60980, AT1G13440, AT5G37510, AT3G04120, AT5G55070, AT3G14990 | 148 | 3406 | 25147 | 2.594079 | 4.02E-09 | 4.02E-09 | 6.15E-08 |
| salt      | GO:0005886~plasma membrane                  | 51 | 22.08 | 2.18E-03 | AT4G32150, AT1G51460, AT3G12360, AT5G40770, AT3G46550, AT1G60940, AT3G47950, AT3G61050, AT2G32010, AT5G14920, AT3G50500, AT3G17980, AT5G60920, AT1G04120, AT4G24500, AT3G05360, AT2G47900, AT3G51920, AT4G17615, AT5G27150, AT2G01980, AT5G58070, AT5G07350, AT3G06370, AT3G44110, AT2G45960, AT4G10310, AT5G59010, AT1G51500, AT5G03280, AT1G17840, AT1G13930, AT1G65690, AT1G49300, AT2G26650, AT5G01410, AT4G29810, AT2G33080, AT3G17510, AT3G45680, AT5G35410, AT4G01420, AT2G27300, AT5G58580, AT4G23650, AT5G62460, AT1G15690, AT5G19690, AT4G24190, AT1G15100, AT4G39730            | 229 | 3702 | 25147 | 1.51281  | 1.89E-01 | 2.95E-02 | 2.38E+00 |
| salt      | GO:0000325~plant-type vacuole               | 5  | 2.16  | 4.66E-04 | AT1G53210, AT1G04120, AT5G27150, AT1G15690, AT2G41560                                                                                                                                                                                                                                                                                                                                                                                                                                                                                                                                      | 229 | 40   | 25147 | 13.72653 | 4.37E-02 | 8.90E-03 | 5.12E-01 |
| salt      | GO:0009897~external side of plasma membrane | 3  | 1.30  | 4.85E-04 | AT5G60920, AT1G17840, AT3G46550                                                                                                                                                                                                                                                                                                                                                                                                                                                                                                                                                            | 229 | 4    | 25147 | 82.35917 | 4.55E-02 | 7.74E-03 | 5.33E-01 |
| salt      | GO:0005773~vacuole                          | 17 | 7.36  | 2.18E-04 | AT1G53210, AT1G04120, AT2G38170, AT4G32150, AT2G45960, AT5G40770, AT2G41560, AT1G64460, AT5G11150, AT5G22360, AT4G23650, AT5G27150, AT3G20250, AT1G15690, AT5G58070, AT4G24190, AT4G39730                                                                                                                                                                                                                                                                                                                                                                                                  | 229 | 629  | 25147 | 2.967898 | 2.07E-02 | 5.21E-03 | 2.39E-01 |
| salt      | GO:0005774~vacuolar membrane                | 19 | 8.23  | 2.17E-06 | AT1G53210, AT1G04120, AT2G38170, AT3G51390, AT4G32150, AT5G40770, AT2G04030, AT3G22200, AT2G41560, AT5G14040, AT5G11150, AT3G48680, AT1G49300, AT5G27150, AT1G15690, AT5G58070, AT4G24190, AT3G06370, AT4G39730                                                                                                                                                                                                                                                                                                                                                                            | 229 | 536  | 25147 | 3.892598 | 2.09E-04 | 6.95E-05 | 2.39E-03 |



|       |                                  |     |       |          |                                                                                                                                                                                                                                                                                                                                                                                                                                                                                                                                                                                                                                                                                                                                                                                                                                                                                                                                                                                                                                                                                                                                                                                                                                                                                                                                                                                                                                                      |     |      |       |          |          |          |          |
|-------|----------------------------------|-----|-------|----------|------------------------------------------------------------------------------------------------------------------------------------------------------------------------------------------------------------------------------------------------------------------------------------------------------------------------------------------------------------------------------------------------------------------------------------------------------------------------------------------------------------------------------------------------------------------------------------------------------------------------------------------------------------------------------------------------------------------------------------------------------------------------------------------------------------------------------------------------------------------------------------------------------------------------------------------------------------------------------------------------------------------------------------------------------------------------------------------------------------------------------------------------------------------------------------------------------------------------------------------------------------------------------------------------------------------------------------------------------------------------------------------------------------------------------------------------------|-----|------|-------|----------|----------|----------|----------|
| salt  |                                  |     |       |          | AT4G06634, AT1G16060, AT3G06930, AT3G12360, AT1G60940, AT5G26742, AT3G49810, AT5G63980, AT1G43160, AT1G27730, AT1G73500, AT5G62090, AT2G01900, AT2G47460, AT3G50500, AT4G25520, AT1G10170, AT1G78310, AT3G17980, AT2G26430, AT5G46350, AT4G16830, AT2G37678, AT1G73660, AT4G24500, AT3G55270, AT2G18250, AT1G10940, AT3G51960, AT2G43790, AT3G03450, AT4G38630, AT5G01520, AT5G08450, AT1G10570, AT2G19450, AT3G57180, AT5G03280, AT1G51500, AT1G14920, AT5G66880, AT3G46930, AT3G61890, AT3G17510, AT1G55870, AT1G14350, AT3G27460, AT5G05660, AT2G30250, AT1G53300, AT3G63060, AT1G31470, AT4G33950, AT5G26751, AT1G10880, AT2G27300, AT4G01370, AT4G40010, AT3G57480, AT1G66350, AT3G51780, AT2G01430, AT5G08520, AT2G39770, AT1G60220, AT4G14300, AT4G24190, AT1G67580, AT1G15100, AT1G01510, AT3G09350, AT5G37370, AT1G03060, AT2G32010, AT5G003740, AT1G28380, AT4G26630, AT3G05700, AT5G67300, AT4G22330, AT2G47580, AT5G08590, AT1G06040, AT1G12610, AT2G47900, AT5G13330, AT5G56030, AT3G51920, AT2G26190, AT4G21670, AT1G66230, AT2G32700, AT5G57630, AT3G23250, AT1G27760, AT3G51390, AT5G49450, AT1G56600, AT1G17950, AT1G32230, AT1G69310, AT2G33700, AT3G22310, AT5G40550, AT5G24240, AT5G63650, AT2G38470, AT2G45640, AT5G04760, AT1G21610, AT5G08620, AT5G02020, AT2G01570, AT5G63110, AT3G06010, AT5G35410, AT3G06590, AT4G34710, AT3G54770, AT4G01420, AT1G64460, AT5G58580, AT4G37260, AT4G23650, AT2G38340, AT2G35510, AT2G41010 | 229 | 9796 | 25147 | 1.423658 | 3.92E-05 | 1.96E-05 | 4.49E-04 |
| salt  | GO:0005634~nucleus               | 127 | 54.98 | 4.08E-07 | AT1G74920, AT1G01510, AT3G44110, AT4G24800, AT3G48330, AT3G06930, AT2G04030, AT1G60940, AT3G22200, AT5G66880, AT2G46500, AT5G63980, AT4G26630, AT1G65690, AT5G01410, AT5G24240, AT3G50500, AT3G17980, AT3G23940, AT2G47580, AT4G24500, AT3G55270, AT2G47900, AT4G33950, AT5G56030, AT3G51920, AT2G18250, AT5G26751, AT1G10940, AT4G01370, AT4G23650, AT4G40010, AT5G57630, AT3G20250, AT3G51780, AT1G15690, AT5G58070, AT4G14300, AT2G39770, AT5G61780, AT1G30580, AT5G07350, AT4G24190, AT4G38630, AT1G10370, AT1G67580, AT5G01520, AT4G39730                                                                                                                                                                                                                                                                                                                                                                                                                                                                                                                                                                                                                                                                                                                                                                                                                                                                                                       | 229 | 2309 | 25147 | 2.282801 | 9.97E-06 | 9.97E-06 | 1.14E-04 |
| water | GO:0009506~plasmodesma           | 19  | 9.00  | 1.77E-03 | AT2G37170, AT1G20450, AT2G37180, AT2G18960, AT3G54820, AT3G16240, AT4G35100, AT2G47800, AT3G16640, AT2G45960, AT5G56030, AT1G47128, AT4G00430, AT3G53420, AT1G32560, AT3G61430, AT1G80410, AT1G01620, AT4G24190                                                                                                                                                                                                                                                                                                                                                                                                                                                                                                                                                                                                                                                                                                                                                                                                                                                                                                                                                                                                                                                                                                                                                                                                                                      | 208 | 1008 | 25147 | 2.278851 | 1.55E-01 | 2.77E-02 | 1.93E+00 |
| water | GO:0042807~central vacuole       | 3   | 1.42  | 2.91E-03 | AT3G16240, AT2G36830, AT4G01470                                                                                                                                                                                                                                                                                                                                                                                                                                                                                                                                                                                                                                                                                                                                                                                                                                                                                                                                                                                                                                                                                                                                                                                                                                                                                                                                                                                                                      | 208 | 10   | 25147 | 36.26971 | 2.42E-01 | 2.73E-02 | 3.15E+00 |
| water | GO:0009941~chloroplast envelope  | 13  | 6.16  | 1.90E-03 | AT3G16240, AT3G52150, AT2G04030, AT2G42540, AT2G20890, AT1G76080, AT3G45140, AT1G32080, AT3G61430, AT5G52440, AT1G15690, AT5G67030, AT2G36830                                                                                                                                                                                                                                                                                                                                                                                                                                                                                                                                                                                                                                                                                                                                                                                                                                                                                                                                                                                                                                                                                                                                                                                                                                                                                                        | 208 | 543  | 25147 | 2.894452 | 1.66E-01 | 2.55E-02 | 2.07E+00 |
| water | GO:0005886~plasma membrane       | 47  | 22.27 | 2.43E-03 | AT2G37170, AT3G26090, AT4G35100, AT2G45960, AT4G18780, AT4G00430, AT1G18390, AT3G61050, AT5G06530, AT3G53420, AT5G47100, AT5G13750, AT2G41225, AT2G26650, AT1G21270, AT1G32080, AT1G07000, AT5G52440, AT3G10500, AT5G14420, AT1G01620, AT3G50500, AT1G05180, AT5G58430, AT2G18960, AT2G17820, AT2G37180, AT3G54820, AT3G16240, AT1G30270, AT4G31390, AT2G47800, AT3G51920, AT3G16640, AT4G17615, AT4G01420, AT5G52050, AT3G61430, AT1G15690, AT1G12480, AT3G01650, AT1G08720, AT1G12110, AT4G24190, AT1G79600, AT1G60200, AT4G39730                                                                                                                                                                                                                                                                                                                                                                                                                                                                                                                                                                                                                                                                                                                                                                                                                                                                                                                  | 208 | 3702 | 25147 | 1.534915 | 2.07E-01 | 2.54E-02 | 2.64E+00 |
| water | GO:0005783~endoplasmic reticulum | 15  | 7.11  | 2.15E-03 | AT2G17820, AT5G50430, AT1G58440, AT3G17000, AT2G41230, AT1G67360, AT5G18290, AT3G61050, AT1G08720, AT3G04090, AT3G12490, AT4G24190, AT3G18490, AT1G17280, AT4G39730                                                                                                                                                                                                                                                                                                                                                                                                                                                                                                                                                                                                                                                                                                                                                                                                                                                                                                                                                                                                                                                                                                                                                                                                                                                                                  | 208 | 703  | 25147 | 2.579638 | 1.85E-01 | 2.53E-02 | 2.34E+00 |
| water | GO:0005811~lipid particle        | 4   | 1.90  | 4.09E-04 | AT1G70670, AT1G67360, AT3G05500, AT2G47780                                                                                                                                                                                                                                                                                                                                                                                                                                                                                                                                                                                                                                                                                                                                                                                                                                                                                                                                                                                                                                                                                                                                                                                                                                                                                                                                                                                                           | 208 | 18   | 25147 | 26.86645 | 3.82E-02 | 7.75E-03 | 4.49E-01 |
| water | GO:0005634~nucleus               | 108 | 51.18 | 1.28E-04 | AT1G20450, AT4G31920, AT2G28625, AT1G15360, AT1G16060, AT1G52890,                                                                                                                                                                                                                                                                                                                                                                                                                                                                                                                                                                                                                                                                                                                                                                                                                                                                                                                                                                                                                                                                                                                                                                                                                                                                                                                                                                                    | 208 | 9796 | 25147 | 1.332901 | 1.21E-02 | 3.04E-03 | 1.41E-01 |

|                    |                                                  |    |       |          |                                                                                                                                                                                                                                                                                                                                                                                                                                                                                                                                                                                                                                                                                                                                                                                                                                                                                                                                                                                                                                                                                                                                                                  |     |      |       |          |          |          |          |  |
|--------------------|--------------------------------------------------|----|-------|----------|------------------------------------------------------------------------------------------------------------------------------------------------------------------------------------------------------------------------------------------------------------------------------------------------------------------------------------------------------------------------------------------------------------------------------------------------------------------------------------------------------------------------------------------------------------------------------------------------------------------------------------------------------------------------------------------------------------------------------------------------------------------------------------------------------------------------------------------------------------------------------------------------------------------------------------------------------------------------------------------------------------------------------------------------------------------------------------------------------------------------------------------------------------------|-----|------|-------|----------|----------|----------|----------|--|
|                    |                                                  |    |       |          | AT1G45249, AT1G18390, AT5G63980, AT3G16857, AT4G25480, AT1G07000, AT1G27730, AT3G50500, AT5G07690, AT1G04400, AT4G24275, AT2G30580, AT3G11020, AT1G78080, AT2G39550, AT3G56400, AT3G17000, AT2G41230, AT1G06770, AT4G39090, AT3G47600, AT5G18320, AT4G08920, AT2G31470, AT1G28520, AT5G66880, AT3G46930, AT2G46400, AT3G10500, AT3G13672, AT3G59380, AT1G14350, AT2G31870, AT2G33230, AT4G03260, AT5G64010, AT3G16800, AT3G20310, AT1G20440, AT3G63060, AT2G38880, AT4G33950, AT5G08120, AT5G60410, AT1G36060, AT4G14300, AT4G24190, AT1G69600, AT3G14080, AT4G35100, AT5G27620, AT5G11270, AT3G22380, AT5G64960, AT5G03740, AT5G62470, AT3G05700, AT1G33240, AT2G25180, AT3G46620, AT3G23050, AT2G18960, AT1G12610, AT2G40750, AT5G56030, AT3G51920, AT1G13740, AT3G23250, AT2G40220, AT1G08720, AT1G80710, AT1G80410, AT1G19120, AT5G05410, AT1G46768, AT3G62770, AT1G22810, AT5G48870, AT3G26090, AT3G15500, AT4G24020, AT2G42620, AT1G17950, AT1G32230, AT5G59550, AT1G69310, AT3G19600, AT3G22310, AT4G27410, AT5G14420, AT1G05180, AT5G08620, AT5G09410, AT1G30270, AT3G06010, AT3G12630, AT3G16640, AT3G54770, AT4G01420, AT4G23450, AT3G53600, AT1G54160 |     |      |       |          |          |          |          |  |
| water              | GO:0005829~cytosol                               | 43 | 20.38 | 7.55E-07 | AT1G74920, AT1G20450, AT3G62770, AT4G34890, AT3G52450, AT2G04030, AT5G64960, AT1G52690, AT5G66880, AT5G59550, AT1G32560, AT5G63980, AT1G07000, AT3G46620, AT3G50500, AT1G05180, AT3G46970, AT3G29320, AT5G58430, AT1G30270, AT1G20440, AT2G35930, AT5G13780, AT4G33950, AT5G56030, AT3G51920, AT3G16640, AT5G13030, AT1G47128, AT5G06760, AT5G58787, AT2G35300, AT3G20250, AT1G15690, AT1G08720, AT4G14300, AT3G12490, AT1G80410, AT4G24190, AT1G07240, AT1G10370, AT4G39730, AT1G52340                                                                                                                                                                                                                                                                                                                                                                                                                                                                                                                                                                                                                                                                          | 208 | 2309 | 25147 | 2.251476 | 7.17E-05 | 2.39E-05 | 8.30E-04 |  |
| water              | GO:0005773~vacuole                               | 22 | 10.43 | 6.39E-08 | AT2G37170, AT2G18960, AT2G37180, AT3G54820, AT3G16240, AT4G35100, AT2G47800, AT2G45960, AT1G67360, AT1G47128, AT4G00430, AT4G39090, AT3G53420, AT3G61430, AT3G20250, AT1G15690, AT2G36830, AT1G01620, AT4G24190, AT3G05500, AT1G04400, AT4G39730                                                                                                                                                                                                                                                                                                                                                                                                                                                                                                                                                                                                                                                                                                                                                                                                                                                                                                                 | 208 | 629  | 25147 | 4.228583 | 6.07E-06 | 3.03E-06 | 7.02E-05 |  |
| water              | GO:0005887~integral component of plasma membrane | 16 | 7.58  | 1.00E-08 | AT2G37170, AT2G37180, AT2G18960, AT3G54820, AT3G16240, AT4G35100, AT2G45960, AT5G18290, AT4G00430, AT3G53420, AT2G26650, AT3G61430, AT2G36830, AT3G04090, AT1G01620, AT4G01470                                                                                                                                                                                                                                                                                                                                                                                                                                                                                                                                                                                                                                                                                                                                                                                                                                                                                                                                                                                   | 208 | 275  | 25147 | 7.034126 | 9.54E-07 | 9.54E-07 | 1.10E-05 |  |
| Molecular function |                                                  |    |       |          |                                                                                                                                                                                                                                                                                                                                                                                                                                                                                                                                                                                                                                                                                                                                                                                                                                                                                                                                                                                                                                                                                                                                                                  |     |      |       |          |          |          |          |  |
| cold               | GO:0000166~nucleotide binding                    | 11 | 7.64  | 2.00E-03 | AT1G06960, AT3G52150, AT1G60650, AT2G21660, AT5G04280, AT4G13850, AT1G70200, AT4G24770, AT3G20930, AT3G26420, AT3G53460                                                                                                                                                                                                                                                                                                                                                                                                                                                                                                                                                                                                                                                                                                                                                                                                                                                                                                                                                                                                                                          | 122 | 504  | 18171 | 3.250732 | 2.62E-01 | 4.25E-02 | 2.37E+00 |  |
| cold               | GO:0003676~nucleic acid binding                  | 13 | 9.03  | 8.26E-04 | AT5G59820, AT2G33835, AT3G52150, AT5G04280, AT4G13850, AT1G70200, AT4G36020, AT3G53460, AT2G17870, AT1G60650, AT2G21660, AT4G38680, AT4G24770                                                                                                                                                                                                                                                                                                                                                                                                                                                                                                                                                                                                                                                                                                                                                                                                                                                                                                                                                                                                                    | 122 | 615  | 18171 | 3.148381 | 1.18E-01 | 2.07E-02 | 9.84E-01 |  |
| cold               | GO:0003729~mRNA binding                          | 10 | 6.94  | 5.72E-04 | AT2G21660, AT1G56070, AT5G04280, AT4G38680, AT4G24770, AT4G36020, AT3G26420, AT2G37230, AT3G53460, AT2G17870                                                                                                                                                                                                                                                                                                                                                                                                                                                                                                                                                                                                                                                                                                                                                                                                                                                                                                                                                                                                                                                     | 122 | 351  | 18171 | 4.24338  | 8.33E-02 | 1.72E-02 | 6.83E-01 |  |
| cold               | GO:0003677~DNA binding                           | 28 | 19.44 | 3.66E-04 | AT3G07740, AT5G62470, AT4G25480, AT4G36930, AT5G64220, AT4G38680, AT3G26420, AT2G46830, AT4G16420, AT3G61950, AT5G09410, AT2G33835, AT2G46810, AT2G40970, AT4G31690, AT2G46590, AT5G04280, AT1G01060, AT2G36530, AT2G17870, AT1G60650, AT3G23250, AT4G25470, AT4G25490, AT3G49530, AT4G08500, AT4G16150, AT1G46768                                                                                                                                                                                                                                                                                                                                                                                                                                                                                                                                                                                                                                                                                                                                                                                                                                               | 122 | 2047 | 18171 | 2.03732  | 5.41E-02 | 1.38E-02 | 4.37E-01 |  |
| cold               | GO:0003723~RNA binding                           | 17 | 11.81 | 5.11E-05 | AT3G52150, AT3G53110, AT3G14080, AT5G04280, AT1G01860, AT4G13850, AT3G21300, AT4G36020, AT3G53460, AT2G17870, AT1G06960, AT1G60650, AT2G21660, AT1G19120, AT4G24770, AT3G20930, AT3G26420                                                                                                                                                                                                                                                                                                                                                                                                                                                                                                                                                                                                                                                                                                                                                                                                                                                                                                                                                                        | 122 | 769  | 18171 | 3.29262  | 7.73E-03 | 2.58E-03 | 6.11E-02 |  |
| cold               | GO:0005515~protein binding                       | 30 | 20.83 | 1.49E-05 | AT5G54590, AT3G14080, AT2G39810, AT1G60170, AT1G27320, AT1G22770, AT4G12470, AT5G62390, AT5G10450, AT4G36930, AT4G29810, AT5G50950,                                                                                                                                                                                                                                                                                                                                                                                                                                                                                                                                                                                                                                                                                                                                                                                                                                                                                                                                                                                                                              | 122 | 1901 | 18171 | 2.350489 | 2.27E-03 | 1.13E-03 | 1.79E-02 |  |

|       |                                                                                                                          |    |       |          |                                                                                                                                                                                                                                                                                                                                                                                                                                                                                                                                                                                                                             |     |      |       |          |          |          |          |
|-------|--------------------------------------------------------------------------------------------------------------------------|----|-------|----------|-----------------------------------------------------------------------------------------------------------------------------------------------------------------------------------------------------------------------------------------------------------------------------------------------------------------------------------------------------------------------------------------------------------------------------------------------------------------------------------------------------------------------------------------------------------------------------------------------------------------------------|-----|------|-------|----------|----------|----------|----------|
|       |                                                                                                                          |    |       |          | AT4G26080, AT5G53470, AT2G18790, AT2G46830, AT4G16420, AT3G55580, AT5G20230, AT4G24500, AT1G10760, AT3G04740, AT2G17870, AT4G01370, AT5G15090, AT1G19120, AT2G43790, AT5G35750, AT1G33410, AT4G08500                                                                                                                                                                                                                                                                                                                                                                                                                        |     |      |       |          |          |          |          |
| cold  | GO:0001077~transcriptional activator activity, RNA polymerase II core promoter proximal region sequence-specific binding | 4  | 2.78  | 5.68E-06 | AT5G09410, AT2G22300, AT5G64220, AT4G16150                                                                                                                                                                                                                                                                                                                                                                                                                                                                                                                                                                                  | 122 | 6    | 18171 | 99.29508 | 8.63E-04 | 8.63E-04 | 6.79E-03 |
| heat  | GO:0043565~sequence-specific DNA binding                                                                                 | 12 | 11.76 | 6.06E-04 | AT2G26150, AT5G59820, AT2G20880, AT2G30250, AT1G12610, AT2G38470, AT5G16820, AT1G28520, AT3G10800, AT5G05410, AT5G07100, AT3G16770                                                                                                                                                                                                                                                                                                                                                                                                                                                                                          | 93  | 676  | 18171 | 3.46841  | 9.30E-02 | 4.76E-02 | 7.30E-01 |
| heat  | GO:0008094~DNA-dependent ATPase activity                                                                                 | 4  | 3.92  | 7.31E-04 | AT3G06400, AT3G10140, AT3G24320, AT2G46020                                                                                                                                                                                                                                                                                                                                                                                                                                                                                                                                                                                  | 93  | 35   | 18171 | 22.32995 | 1.11E-01 | 3.85E-02 | 8.80E-01 |
| heat  | GO:0005515~protein binding                                                                                               | 36 | 35.29 | 2.70E-12 | AT4G11260, AT4G29770, AT5G47910, AT3G28030, AT1G64520, AT1G54490, AT1G64280, AT5G07100, AT5G21160, AT2G26150, AT4G04950, AT3G06400, AT1G66340, AT1G03190, AT5G62390, AT3G17880, AT5G44650, AT4G26080, AT2G38470, AT5G02500, AT3G16770, AT5G56010, AT4G26840, AT2G30250, AT5G17020, AT2G46020, AT5G57050, AT5G60410, AT1G50500, AT1G74310, AT2G39770, AT5G53060, AT4G38630, AT1G56260, AT5G05410, AT3G10800                                                                                                                                                                                                                  | 93  | 1901 | 18171 | 3.700124 | 4.34E-10 | 4.34E-10 | 3.26E-09 |
| light | GO:0004871~signal transducer activity                                                                                    | 7  | 4.93  | 6.52E-04 | AT5G64330, AT1G53090, AT2G26300, AT4G16250, AT2G46340, AT2G18790, AT1G09570                                                                                                                                                                                                                                                                                                                                                                                                                                                                                                                                                 | 128 | 150  | 18171 | 6.624844 | 9.96E-02 | 9.50E-03 | 7.85E-01 |
| light | GO:0071949~FAD binding                                                                                                   | 4  | 2.82  | 6.85E-04 | AT4G08920, AT1G77760, AT1G37130, AT1G04400                                                                                                                                                                                                                                                                                                                                                                                                                                                                                                                                                                                  | 128 | 25   | 18171 | 22.71375 | 1.04E-01 | 9.16E-03 | 8.25E-01 |
| light | GO:0016987~sigma factor activity                                                                                         | 3  | 2.11  | 7.14E-04 | AT5G24120, AT1G08540, AT2G36990                                                                                                                                                                                                                                                                                                                                                                                                                                                                                                                                                                                             | 128 | 6    | 18171 | 70.98047 | 1.09E-01 | 8.80E-03 | 8.59E-01 |
| light | GO:0001053~plastid sigma factor activity                                                                                 | 3  | 2.11  | 7.14E-04 | AT5G24120, AT1G08540, AT2G36990                                                                                                                                                                                                                                                                                                                                                                                                                                                                                                                                                                                             | 128 | 6    | 18171 | 70.98047 | 1.09E-01 | 8.80E-03 | 8.59E-01 |
| light | GO:0008020~G-protein coupled photoreceptor activity                                                                      | 3  | 2.11  | 2.88E-04 | AT4G16250, AT2G18790, AT1G09570                                                                                                                                                                                                                                                                                                                                                                                                                                                                                                                                                                                             | 128 | 4    | 18171 | 106.4707 | 4.53E-02 | 4.63E-03 | 3.48E-01 |
| light | GO:0009883~red or far-red light photoreceptor activity                                                                   | 3  | 2.11  | 1.45E-04 | AT4G16250, AT2G18790, AT1G09570                                                                                                                                                                                                                                                                                                                                                                                                                                                                                                                                                                                             | 128 | 3    | 18171 | 141.9609 | 2.30E-02 | 2.59E-03 | 1.75E-01 |
| light | GO:0046983~protein dimerization activity                                                                                 | 11 | 7.75  | 9.61E-05 | AT1G26945, AT1G26260, AT2G20180, AT4G36930, AT1G02340, AT5G61270, AT5G48560, AT1G10120, AT2G43010, AT1G09530, AT4G34530                                                                                                                                                                                                                                                                                                                                                                                                                                                                                                     | 128 | 325  | 18171 | 4.804832 | 1.54E-02 | 1.93E-03 | 1.16E-01 |
| light | GO:0003677~DNA binding                                                                                                   | 31 | 21.83 | 5.93E-05 | AT1G26260, AT2G20180, AT5G43630, AT2G36890, AT1G10120, AT2G43010, AT2G36990, AT4G01120, AT2G21650, AT5G24120, AT3G61850, AT4G36930, AT5G48560, AT3G54610, AT5G07690, AT2G46590, AT1G02340, AT1G08540, AT1G09530, AT1G25540, AT4G34530, AT2G36530, AT4G25560, AT5G39760, AT1G10522, AT5G28490, AT5G20730, AT5G61270, AT4G28610, AT4G17490, AT1G54160                                                                                                                                                                                                                                                                         | 128 | 2047 | 18171 | 2.149873 | 9.51E-03 | 1.36E-03 | 7.17E-02 |
| light | GO:0000155~phosphorelay sensor kinase activity                                                                           | 5  | 3.52  | 8.13E-06 | AT3G45780, AT4G16250, AT5G58140, AT2G18790, AT1G09570                                                                                                                                                                                                                                                                                                                                                                                                                                                                                                                                                                       | 128 | 19   | 18171 | 37.35814 | 1.31E-03 | 2.18E-04 | 9.83E-03 |
| light | GO:0009881~photoreceptor activity                                                                                        | 5  | 3.52  | 1.08E-06 | AT1G68050, AT5G57360, AT4G16250, AT2G18790, AT1G09570                                                                                                                                                                                                                                                                                                                                                                                                                                                                                                                                                                       | 128 | 12   | 18171 | 59.15039 | 1.74E-04 | 3.47E-05 | 1.30E-03 |
| light | GO:0003700~transcription factor activity, sequence-specific DNA binding                                                  | 34 | 23.94 | 4.87E-08 | AT5G59820, AT1G26260, AT1G21970, AT2G20180, AT3G21150, AT2G36890, AT1G10120, AT2G43010, AT2G21320, AT2G36990, AT4G01120, AT3G02790, AT2G21650, AT5G24120, AT3G61850, AT4G36930, AT2G24790, AT5G48560, AT4G40060, AT1G10170, AT5G07690, AT2G46590, AT1G02340, AT1G08540, AT1G09530, AT4G34530, AT4G25560, AT5G39760, AT5G61270, AT5G20730, AT4G28610, AT4G17490, AT4G15090, AT1G54160                                                                                                                                                                                                                                        | 128 | 1711 | 18171 | 2.820965 | 7.85E-06 | 2.62E-06 | 5.89E-05 |
| light | GO:0042803~protein homodimerization activity                                                                             | 12 | 8.45  | 5.15E-08 | AT5G39760, AT2G37678, AT3G61600, AT4G08920, AT4G16250, AT2G46260, AT5G02200, AT3G47340, AT2G18790, AT1G09570, AT1G04400, AT2G40080                                                                                                                                                                                                                                                                                                                                                                                                                                                                                          | 128 | 179  | 18171 | 9.516934 | 8.29E-06 | 2.07E-06 | 6.23E-05 |
| light | GO:0009882~blue light photoreceptor activity                                                                             | 5  | 3.52  | 1.13E-08 | AT5G57360, AT4G08920, AT3G45780, AT5G58140, AT1G04400                                                                                                                                                                                                                                                                                                                                                                                                                                                                                                                                                                       | 128 | 5    | 18171 | 141.9609 | 1.82E-06 | 9.11E-07 | 1.37E-05 |
| light | GO:0005515~protein binding                                                                                               | 55 | 38.73 | 6.49E-21 | AT1G26260, AT1G21970, AT3G21150, AT4G16250, AT4G28860, AT1G10120, AT5G27620, AT4G14110, AT2G36990, AT5G55280, AT1G09570, AT1G22770, AT1G68050, AT1G20090, AT4G36930, AT5G48560, AT3G59220, AT2G46260, AT2G18790, AT1G04400, AT1G53090, AT5G57360, AT1G09530, AT1G25540, AT4G34530, AT4G25560, AT5G64330, AT1G10522, AT3G28860, AT4G28880, AT4G08920, AT2G20180, AT2G43010, AT1G48270, AT4G01120, AT3G05420, AT2G26300, AT3G45780, AT2G24790, AT1G77760, AT3G54610, AT1G26830, AT2G46340, AT1G66840, AT2G39840, AT3G61600, AT1G02340, AT1G70800, AT5G02200, AT1G10470, AT5G39760, AT2G05620, AT4G17490, AT5G43470, AT4G04770 | 128 | 1901 | 18171 | 4.107234 | 1.04E-18 | 1.04E-18 | 7.84E-18 |

|           |                                                                                           |    |       |          |                                                                                                                                                                                                                                                                                                                                                                                                                                                                                         |     |      |       |          |          |          |          |
|-----------|-------------------------------------------------------------------------------------------|----|-------|----------|-----------------------------------------------------------------------------------------------------------------------------------------------------------------------------------------------------------------------------------------------------------------------------------------------------------------------------------------------------------------------------------------------------------------------------------------------------------------------------------------|-----|------|-------|----------|----------|----------|----------|
| osmotic   | GO:0019900~kinase binding                                                                 | 3  | 2.63  | 1.26E-03 | AT5G35750, AT4G17615, AT4G08500                                                                                                                                                                                                                                                                                                                                                                                                                                                         | 99  | 10   | 18171 | 55.06364 | 1.54E-01 | 2.37E-02 | 1.46E+00 |
| osmotic   | GO:0005524~ATP binding                                                                    | 26 | 22.81 | 6.37E-04 | AT4G13850, AT1G60940, AT5G66880, AT1G72180, AT3G46930, AT3G45640, AT2G23030, AT5G45800, AT5G63650, AT3G50500, AT3G17510, AT1G78290, AT3G08730, AT5G35550, AT5G08590, AT4G33950, AT2G18250, AT1G10940, AT2G41560, AT4G01370, AT5G57630, AT2G43850, AT4G40010, AT2G43790, AT4G08500, AT1G35720                                                                                                                                                                                            | 99  | 2372 | 18171 | 2.011881 | 8.13E-02 | 1.40E-02 | 7.43E-01 |
| osmotic   | GO:0005034~osmosensor activity                                                            | 3  | 2.63  | 1.72E-04 | AT2G17820, AT1G27320, AT5G35750                                                                                                                                                                                                                                                                                                                                                                                                                                                         | 99  | 4    | 18171 | 137.6591 | 2.26E-02 | 4.55E-03 | 2.00E-01 |
| osmotic   | GO:0004672~protein kinase activity                                                        | 13 | 11.40 | 1.09E-05 | AT3G08730, AT5G08590, AT4G33950, AT1G60940, AT1G10940, AT5G66880, AT4G01370, AT1G72180, AT2G43850, AT3G45640, AT5G45800, AT2G43790, AT3G50500                                                                                                                                                                                                                                                                                                                                           | 99  | 482  | 18171 | 4.950396 | 1.45E-03 | 3.62E-04 | 1.27E-02 |
| osmotic   | GO:0004674~protein serine/threonine kinase activity                                       | 17 | 14.91 | 5.89E-06 | AT3G08730, AT5G08590, AT4G33950, AT1G60940, AT1G10940, AT5G66880, AT1G72180, AT2G43850, AT4G40010, AT5G57630, AT5G45800, AT2G23030, AT5G63650, AT3G50500, AT3G17510, AT4G08500, AT1G78290                                                                                                                                                                                                                                                                                               | 99  | 804  | 18171 | 3.880936 | 7.83E-04 | 2.61E-04 | 6.89E-03 |
| osmotic   | GO:0016301~kinase activity                                                                | 20 | 17.54 | 2.42E-06 | AT3G08730, AT5G08590, AT4G33950, AT1G60940, AT1G10940, AT5G66880, AT4G01370, AT1G72180, AT3G46930, AT2G43850, AT4G40010, AT5G57630, AT3G45640, AT2G23030, AT5G63650, AT2G43790, AT3G50500, AT3G17510, AT4G08500, AT1G78290                                                                                                                                                                                                                                                              | 99  | 1039 | 18171 | 3.533118 | 3.22E-04 | 1.61E-04 | 2.83E-03 |
| osmotic   | GO:0005515~protein binding                                                                | 34 | 29.82 | 4.90E-10 | AT1G01510, AT3G33520, AT1G43700, AT1G27320, AT4G18780, AT5G49450, AT5G66880, AT1G32230, AT1G72180, AT3G45640, AT5G01410, AT5G19660, AT5G62090, AT3G50500, AT4G25520, AT3G17510, AT3G08730, AT2G17820, AT5G13170, AT3G56400, AT4G33950, AT2G40750, AT5G57050, AT2G32700, AT4G01370, AT1G50500, AT2G43850, AT5G57630, AT2G40220, AT5G53060, AT2G43790, AT5G35750, AT4G08500, AT1G15100                                                                                                    | 99  | 1901 | 18171 | 3.28277  | 6.52E-08 | 6.52E-08 | 5.73E-07 |
| oxidative | GO:0005515~protein binding                                                                | 23 | 15.23 | 1.64E-03 | AT2G41090, AT5G20230, AT5G39610, AT5G20140, AT4G03520, AT1G78410, AT1G30460, AT1G08830, AT1G32230, AT1G76080, AT4G35090, AT3G11220, AT2G01980, AT5G01410, AT4G35000, AT3G45640, AT5G09830, AT4G11850, AT2G47510, AT4G10090, AT1G32640, AT3G06110, AT3G14990                                                                                                                                                                                                                             | 109 | 1901 | 18171 | 2.016964 | 2.40E-01 | 4.46E-02 | 1.98E+00 |
| oxidative | GO:0008113~peptide-methionine (S)-S-oxide reductase activity                              | 3  | 1.99  | 1.23E-03 | AT5G07460, AT4G04800, AT4G25130                                                                                                                                                                                                                                                                                                                                                                                                                                                         | 109 | 9    | 18171 | 55.56881 | 1.85E-01 | 4.02E-02 | 1.48E+00 |
| oxidative | GO:0047134~protein-disulfide reductase activity                                           | 4  | 2.65  | 6.67E-04 | AT1G76080, AT4G03520, AT1G03680, AT3G15360                                                                                                                                                                                                                                                                                                                                                                                                                                              | 109 | 29   | 18171 | 22.99399 | 1.05E-01 | 2.75E-02 | 8.08E-01 |
| oxidative | GO:0050897~cobalt ion binding                                                             | 6  | 3.97  | 8.50E-06 | AT5G08670, AT4G35090, AT4G11010, AT3G12490, AT1G02930, AT3G22200                                                                                                                                                                                                                                                                                                                                                                                                                        | 109 | 47   | 18171 | 21.28167 | 1.42E-03 | 7.09E-04 | 1.03E-02 |
| oxidative | GO:0004784~superoxide dismutase activity                                                  | 4  | 2.65  | 1.12E-05 | AT4G25100, AT5G18100, AT2G28190, AT1G08830                                                                                                                                                                                                                                                                                                                                                                                                                                              | 109 | 8    | 18171 | 83.35321 | 1.87E-03 | 6.23E-04 | 1.36E-02 |
| oxidative | GO:0005507~copper ion binding                                                             | 13 | 8.61  | 2.04E-08 | AT5G08670, AT2G14170, AT5G20230, AT1G13440, AT4G25100, AT5G18100, AT1G02930, AT2G05710, AT3G04120, AT2G28190, AT1G08830, AT1G35720, AT4G26970                                                                                                                                                                                                                                                                                                                                           | 109 | 241  | 18171 | 8.992463 | 3.41E-06 | 3.41E-06 | 2.48E-05 |
| salt      | GO:0000981~RNA polymerase II transcription factor activity, sequence-specific DNA binding | 8  | 3.46  | 2.09E-03 | AT4G37260, AT5G67300, AT3G23250, AT1G16060, AT2G47460, AT1G17950, AT1G14350, AT1G66230                                                                                                                                                                                                                                                                                                                                                                                                  | 204 | 159  | 18171 | 4.481687 | 3.68E-01 | 4.96E-02 | 2.63E+00 |
| salt      | GO:0003700~transcription factor activity, sequence-specific DNA binding                   | 34 | 14.72 | 1.34E-03 | AT1G16060, AT5G49450, AT1G14920, AT1G17950, AT5G24120, AT1G69310, AT3G61890, AT1G43160, AT5G67300, AT1G27730, AT5G04760, AT2G38470, AT2G47460, AT1G10170, AT1G14350, AT5G46350, AT2G01570, AT5G05660, AT1G06040, AT2G30250, AT1G12610, AT5G13330, AT2G47900, AT3G06590, AT1G66230, AT2G27300, AT4G37260, AT1G66350, AT2G01430, AT3G23250, AT3G51960, AT2G38340, AT5G08520, AT3G03450                                                                                                    | 204 | 1711 | 18171 | 1.770018 | 2.54E-01 | 4.77E-02 | 1.69E+00 |
| salt      | GO:0003690~double-stranded DNA binding                                                    | 6  | 2.60  | 1.34E-03 | AT5G55580, AT3G23830, AT3G18870, AT4G13850, AT4G14605, AT2G34620                                                                                                                                                                                                                                                                                                                                                                                                                        | 204 | 73   | 18171 | 7.321112 | 2.55E-01 | 4.12E-02 | 1.70E+00 |
| salt      | GO:0005524~ATP binding                                                                    | 43 | 18.61 | 1.52E-03 | AT3G44110, AT1G51460, AT4G13850, AT2G04030, AT5G59010, AT1G51500, AT1G60940, AT5G26742, AT5G66880, AT3G47950, AT2G46500, AT1G17840, AT3G46930, AT3G22310, AT4G29810, AT5G24240, AT5G63650, AT1G73500, AT3G50500, AT3G50310, AT3G17510, AT5G08620, AT1G04120, AT5G08590, AT1G73660, AT3G06010, AT5G35410, AT4G33950, AT5G56030, AT2G18250, AT5G26751, AT1G10940, AT2G41560, AT1G64460, AT4G01370, AT4G23650, AT4G40010, AT5G57630, AT1G60490, AT1G30580, AT2G43790, AT4G24190, AT1G67580 | 204 | 2372 | 18171 | 1.614739 | 2.83E-01 | 4.07E-02 | 1.91E+00 |

|       |                                                                         |    |       |          |                                                                                                                                                                                                                                                                                                                                                                                                                                                                                                                                                                                                       |     |      |       |          |          |          |          |
|-------|-------------------------------------------------------------------------|----|-------|----------|-------------------------------------------------------------------------------------------------------------------------------------------------------------------------------------------------------------------------------------------------------------------------------------------------------------------------------------------------------------------------------------------------------------------------------------------------------------------------------------------------------------------------------------------------------------------------------------------------------|-----|------|-------|----------|----------|----------|----------|
| salt  | GO:0015386~potassium:proton antiporter activity                         | 4  | 1.73  | 6.91E-04 | AT5G27150, AT2G01980, AT3G06370, AT3G19490                                                                                                                                                                                                                                                                                                                                                                                                                                                                                                                                                            | 204 | 16   | 18171 | 22.26838 | 1.40E-01 | 2.98E-02 | 8.75E-01 |
| salt  | GO:0000989~transcription factor activity, transcription factor binding  | 4  | 1.73  | 3.62E-04 | AT1G66350, AT2G01570, AT3G03450, AT1G14920                                                                                                                                                                                                                                                                                                                                                                                                                                                                                                                                                            | 204 | 13   | 18171 | 27.40724 | 7.62E-02 | 1.96E-02 | 4.59E-01 |
| salt  | GO:0044212~transcription regulatory region DNA binding                  | 14 | 6.06  | 6.43E-05 | AT2G01570, AT1G12610, AT5G49450, AT1G17950, AT1G66230, AT4G37260, AT1G69310, AT2G38340, AT3G23250, AT5G67300, AT1G27730, AT2G38470, AT2G47460, AT1G14350                                                                                                                                                                                                                                                                                                                                                                                                                                              | 204 | 319  | 18171 | 3.909183 | 1.40E-02 | 4.68E-03 | 8.17E-02 |
| salt  | GO:0043565~sequence-specific DNA binding                                | 27 | 11.69 | 3.95E-08 | AT4G06634, AT5G49450, AT1G14920, AT1G17950, AT3G61050, AT5G03740, AT1G69310, AT3G61890, AT5G67300, AT1G27730, AT2G38470, AT2G47460, AT1G14350, AT5G46350, AT2G01570, AT2G30250, AT1G12610, AT5G13330, AT1G66230, AT2G27300, AT4G37260, AT1G66350, AT2G01430, AT2G38340, AT3G51960, AT3G23250, AT3G03450                                                                                                                                                                                                                                                                                               | 204 | 676  | 18171 | 3.557671 | 8.65E-06 | 4.33E-06 | 5.02E-05 |
| salt  | GO:0005515~protein binding                                              | 53 | 22.94 | 6.24E-10 | AT1G01510, AT3G12360, AT2G04030, AT1G03060, AT4G26630, AT5G62090, AT3G50500, AT4G25520, AT1G78310, AT3G17980, AT5G46350, AT1G73660, AT4G24500, AT1G06040, AT5G56030, AT3G51920, AT4G21670, AT2G32700, AT5G27150, AT5G57630, AT2G01980, AT1G30580, AT2G43790, AT4G38630, AT3G03450, AT2G16005, AT5G35080, AT5G08450, AT5G63510, AT5G49450, AT1G14920, AT5G66880, AT1G32230, AT3G48680, AT1G17840, AT2G26650, AT1G59860, AT5G01410, AT4G29810, AT2G45640, AT2G38470, AT3G17510, AT4G24560, AT2G01570, AT5G63110, AT2G30250, AT5G35410, AT4G33950, AT4G01370, AT2G39770, AT2G41010, AT1G67580, AT1G15100 | 204 | 1901 | 18171 | 2.483376 | 1.37E-07 | 1.37E-07 | 7.94E-07 |
| water | GO:0071949~FAD binding                                                  | 4  | 1.90  | 2.12E-03 | AT4G08920, AT3G30775, AT5G67030, AT1G04400                                                                                                                                                                                                                                                                                                                                                                                                                                                                                                                                                            | 189 | 25   | 18171 | 15.38286 | 3.42E-01 | 3.73E-02 | 2.62E+00 |
| water | GO:0015204~urea transmembrane transporter activity                      | 3  | 1.42  | 1.55E-03 | AT3G16240, AT2G36830, AT4G01470                                                                                                                                                                                                                                                                                                                                                                                                                                                                                                                                                                       | 189 | 6    | 18171 | 48.07143 | 2.64E-01 | 3.02E-02 | 1.93E+00 |
| water | GO:0003677~DNA binding                                                  | 40 | 18.96 | 1.13E-04 | AT4G31920, AT1G22810, AT1G15360, AT3G15500, AT5G11270, AT4G24020, AT1G16060, AT1G17950, AT1G52890, AT1G45249, AT1G18390, AT5G62470, AT3G05700, AT4G25480, AT1G33240, AT3G16857, AT2G25180, AT3G22310, AT3G10500, AT4G27410, AT3G18490, AT5G07690, AT1G14350, AT5G09410, AT3G11020, AT3G20310, AT1G78080, AT1G12610, AT3G06010, AT3G12630, AT5G60410, AT1G36060, AT2G40220, AT3G23250, AT3G47600, AT1G69600, AT1G80710, AT1G54160, AT5G05410, AT1G46768                                                                                                                                                | 189 | 2047 | 18171 | 1.878708 | 2.21E-02 | 2.48E-03 | 1.42E-01 |
| water | GO:0004842~ubiquitin-protein transferase activity                       | 18 | 8.53  | 9.38E-06 | AT5G18320, AT2G30580, AT5G50430, AT4G34100, AT3G52450, AT2G35930, AT3G12630, AT3G17000, AT2G42620, AT4G23450, AT5G59550, AT1G06770, AT3G01650, AT3G46620, AT5G14420, AT3G13672, AT3G56580, AT1G17280                                                                                                                                                                                                                                                                                                                                                                                                  | 189 | 475  | 18171 | 3.643308 | 1.85E-03 | 2.31E-04 | 1.17E-02 |
| water | GO:0044212~transcription regulatory region DNA binding                  | 15 | 7.11  | 6.16E-06 | AT3G11020, AT3G20310, AT1G12610, AT1G17950, AT5G62470, AT1G69310, AT2G46400, AT2G40220, AT3G23250, AT3G53600, AT3G47600, AT1G27730, AT5G07690, AT5G05410, AT1G14350                                                                                                                                                                                                                                                                                                                                                                                                                                   | 189 | 319  | 18171 | 4.520824 | 1.21E-03 | 1.73E-04 | 7.70E-03 |
| water | GO:0003700~transcription factor activity, sequence-specific DNA binding | 39 | 18.48 | 4.77E-06 | AT4G31920, AT1G22810, AT1G15360, AT3G15500, AT5G11270, AT4G24020, AT1G16060, AT1G17950, AT1G52890, AT1G45249, AT5G62470, AT1G69310, AT2G46400, AT4G25480, AT1G33240, AT3G16857, AT2G25180, AT3G10500, AT1G27730, AT3G23050, AT4G27410, AT5G07690, AT1G14350, AT3G11020, AT3G20310, AT1G78080, AT3G56400, AT1G12610, AT2G38880, AT2G40750, AT1G36060, AT2G40220, AT3G23250, AT3G53600, AT3G47600, AT1G69600, AT1G54160, AT5G05410, AT1G46768                                                                                                                                                           | 189 | 1711 | 18171 | 2.19145  | 9.39E-04 | 1.57E-04 | 5.96E-03 |
| water | GO:0016874~ligase activity                                              | 14 | 6.64  | 3.26E-06 | AT5G18320, AT2G30580, AT4G34100, AT3G52450, AT2G35930, AT4G23450, AT1G06770, AT5G59550, AT5G60410, AT3G01650, AT3G46620, AT5G14420, AT3G13672, AT3G56580                                                                                                                                                                                                                                                                                                                                                                                                                                              | 189 | 260  | 18171 | 5.176923 | 6.42E-04 | 1.28E-04 | 4.08E-03 |
| water | GO:0043565~sequence-specific DNA binding                                | 28 | 13.27 | 1.75E-09 | AT1G15360, AT1G28520, AT1G17950, AT1G45249, AT3G61050, AT5G03740, AT5G62470, AT1G69310, AT2G46400, AT1G33240, AT3G10500, AT1G27730, AT4G27410, AT5G07690, AT1G14350, AT5G09410, AT3G11020, AT3G20310, AT1G78080, AT3G56400, AT1G12610, AT2G38880, AT2G40750, AT2G40220, AT3G23250, AT3G53600, AT3G47600, AT5G05410                                                                                                                                                                                                                                                                                    | 189 | 676  | 18171 | 3.982249 | 3.46E-07 | 8.64E-08 | 2.19E-06 |
| water | GO:0005515~protein binding                                              | 51 | 24.17 | 3.24E-10 | AT3G14080, AT4G35100, AT5G27620, AT2G04030, AT5G64960, AT4G18780, AT1G52890, AT1G45249, AT5G47100,                                                                                                                                                                                                                                                                                                                                                                                                                                                                                                    | 189 | 1901 | 18171 | 2.579319 | 6.38E-08 | 2.13E-08 | 4.05E-07 |

|       |                                      |    |      |          |                                                                                                                                                                                                                                                                                                                                                                                                                                                                              |     |    |       |          |          |          |          |
|-------|--------------------------------------|----|------|----------|------------------------------------------------------------------------------------------------------------------------------------------------------------------------------------------------------------------------------------------------------------------------------------------------------------------------------------------------------------------------------------------------------------------------------------------------------------------------------|-----|----|-------|----------|----------|----------|----------|
|       |                                      |    |      |          | AT3G23050, AT3G50500, AT1G04400, AT2G18960, AT2G30580, AT1G78080, AT3G56400, AT5G56030, AT2G40750, AT3G51920, AT5G57050, AT3G28270, AT2G40220, AT1G13740, AT1G08720, AT1G19120, AT5G05410, AT4G08920, AT2G31470, AT3G26090, AT3G15500, AT4G26070, AT5G66880, AT1G32230, AT1G76080, AT3G45140, AT2G26650, AT5G44650, AT2G37040, AT1G01620, AT5G40280, AT3G59380, AT2G17820, AT3G54820, AT3G20310, AT1G30270, AT2G38880, AT4G33950, AT5G08120, AT5G60410, AT2G05620, AT1G69600 |     |    |       |          |          |          |          |
| water | GO:0015250~water channel activity    | 14 | 6.64 | 6.46E-17 | AT2G37170, AT2G37180, AT3G54820, AT3G16240, AT4G35100, AT2G45960, AT5G18290, AT4G00430, AT3G53420, AT3G61430, AT2G36830, AT3G04090, AT1G01620, AT4G01470                                                                                                                                                                                                                                                                                                                     | 189 | 39 | 18171 | 34.51282 | 2.19E-14 | 1.09E-14 | 1.44E-13 |
| water | GO:0015254~glycerol channel activity | 14 | 6.64 | 1.89E-17 | AT2G37170, AT2G37180, AT3G54820, AT3G16240, AT4G35100, AT2G45960, AT5G18290, AT4G00430, AT3G53420, AT3G61430, AT2G36830, AT3G04090, AT1G01620, AT4G01470                                                                                                                                                                                                                                                                                                                     | 189 | 36 | 18171 | 37.38889 | 3.72E-15 | 3.72E-15 | 2.36E-14 |
